# Supplementary material for: Transcriptional immune suppression and up-regulation of double-stranded DNA damage and repair repertoires in ecDNA-containing tumors
Source: eLife. 2024 Jun 19;12:RP88895. doi: 10.7554/eLife.88895 (PMC11186631; doi:10.7554/eLife.88895)
Supplement: Supplementary file 1. — (A) CorEx genes. (B) Extrachromosomal DNA (ecDNA) status of 870 The Cancer Genome Atlas (TCGA) samples across 14 tumor types. (C) Highly co-expressed gene clusters identified using multiscale bootstrap resampling. (D) Cluster #3 and #74 members. (E) Cliff’s delta values of 643 CorEx genes in TCGA samples, and in 11 tumor types with at least 10 ecDNA(+) and 10 ecDNA(-) samples each. (F) Top-|LFC| genes: 643 most significantly differentially expressed genes based on logarithmic fold changes from a DESeq2 analysis. (G) Up-/down-regulated genes in 870 TCGA samples. (H) Gene Ontology (GO) biological processes enriched in up-regulated CorEx genes. (I) Clustering of GO biological processes enriched in up-regulated CorEx genes into 11 broad categories. (J) GO biological processes enriched in Cluster #3 genes. (K) Up-regulated CorEx genes unique to biological process categories. (L) Hand-curated list of 129 genes involved in DSB repair pathways. (M) ecDNA status of 1440 TCGA samples across 24 tumor types. (N) Up-/down-regulated genes in 1,440 TCGA samples. (O) GO biological processes enriched in down-regulated CorEx genes. (P) Clustering of GO biological processes enriched in down-regulated CorEx genes into seven broad categories. (Q) Down-regulated CorEx genes in NF-κB signaling (GO:0007249) involved in pro-apoptotic caspase activation. (R) Differentially mutated genes in ecDNA(+) and ecDNA(-) samples and their odds ratios. [file elife-88895-supp1.xlsx]

## Sheet: 1A
#Gene|GeneId	name	direction(for_geneset_enrichment)	harmonic_mean_rank	#trials(200)	Cluster#	Cluster_n	#trials(200)_by_cluster	avg(feature_importance_MDI)	trials_rank	trials_by_cluster_rank	MDI_rank	posteriorLFC	Cliff_delta
RAE1|8480	ribonucleic acid export 1	UP	1	200	74	2	200	0.00811483	1	1	1	0.327519	0.372803
FBXO17|115290	F-box protein 17	UP	1.2	200	224	1	200	0.00461957	1	1	2	0.766671	0.297667
YTHDF1|54915	YTH N6-methyladenosine RNA binding protein 1	UP	1.28571	200	222	1	200	0.00445897	1	1	3	0.222875	0.289416
DDX27|55661	DEAD-box helicase 27	UP	1.33333	199	230	1	199	0.004433	1	1	4	0.286856	0.276461
SEC61G|23480	SEC61 translocon gamma subunit	UP	1.36364	200	27	4	200	0.0043757	1	1	5	1.58156	0.313914
CHMP7|91782	charged multivesicular body protein 7	DOWN	1.38462	199	231	1	199	0.0043102	1	1	6	-0.279772	-0.316857
XPO7|23039	exportin 7	DOWN	1.41176	197	2	21	200	0.00388161	1	1	8	-0.210975	-0.247474
INTS9|55756	integrator complex subunit 9	DOWN	1.42105	200	48	2	200	0.00378553	1	1	9	-0.181845	-0.27935
GJC1|10052	gap junction protein gamma 1	UP	1.43478	200	223	1	200	0.00357027	1	1	11	0.456037	0.296243
METTL1|4234	methyltransferase like 1	UP	1.44444	197	31	3	200	0.0033361	1	1	13	1.31072	0.289644
TACR1|6869	tachykinin receptor 1	DOWN	1.44828	198	232	1	198	0.00332242	1	1	14	-0.219164	-0.305656
FAM72B|653820	family with sequence similarity 72 member B	UP	1.45714	200	47	2	200	0.00318236	1	1	17	0.586844	0.322596
NUP107|57122	nucleoporin 107	UP	1.46341	196	234	1	196	0.00312396	1	1	20	0.957539	0.272711
KIAA1967|57805	cell cycle and apoptosis regulator 2	DOWN	1.47458	195	48	2	200	0.00297501	1	1	29	-0.20647	-0.261235
C6orf145|221749	PX domain containing 1	UP	1.47619	197	233	1	197	0.00294123	1	1	31	0.367809	0.241265
EGFR|1956	epidermal growth factor receptor	UP	1.48673	195	235	1	195	0.00254479	1	1	56	1.34387	0.125934
C20orf20|55257	MRG domain binding protein	UP	2.4965	192	49	2	196	0.00393766	17	1	7	0.348355	0.322515
TPX2|22974	TPX2 microtubule nucleation factor	UP	2.67541	194	3	21	200	0.00319408	17	1	16	0.412767	0.310582
KIF2C|11004	kinesin family member 2C	UP	2.75889	190	3	21	200	0.00288962	17	1	35	0.335	0.27978
HOXA4|3201	homeobox A4	UP	2.77102	186	17	6	195	0.00275976	17	1	42	0.924445	0.282656
CDK4|1019	cyclin dependent kinase 4	UP	2.79856	188	31	3	200	0.00230454	17	1	76	1.59913	0.24785
PCM1|5108	methyl-CpG binding domain protein 1	DOWN	2.80185	180	2	21	200	0.00302388	31	1	26	-0.242441	-0.28142
AURKA|6790	aurora kinase A	UP	2.85851	184	3	21	200	0.00253784	31	1	58	0.445204	0.308411
HOXA2|3199	homeobox A2	UP	2.89087	162	17	6	195	0.00255073	52	1	54	1.43969	0.237623
C8orf41|80185	TELO2 interacting protein 2	DOWN	2.89575	146	2	21	200	0.00255702	61	1	51	-0.0750368	-0.199665
TSFM|10102	Ts translation elongation factor%2C mitochondrial	UP	2.90488	164	31	3	200	0.00230845	52	1	74	0.910751	0.204954
FAM72D|728833	family with sequence similarity 72 member D	UP	2.90901	158	47	2	200	0.00219444	52	1	83	0.593982	0.301873
HOXA5|3202	homeobox A5	UP	2.91037	138	17	6	195	0.00244781	67	1	63	0.640436	0.183391
PSMA7|5688	proteasome 20S subunit alpha 7	UP	2.91485	144	49	2	196	0.00234315	67	1	70	0.280287	0.293945
MCPH1|79648	microcephalin 1	DOWN	2.92999	112	2	21	200	0.00221455	89	1	79	-0.154064	-0.216114
CCDC25|55246	coiled-coil domain containing 25	DOWN	2.95122	84	2	21	200	0.00200152	120	1	122	-0.192277	-0.209368
INTS10|55174	integrator complex subunit 10	DOWN	2.95951	69	2	21	200	0.00185181	136	1	158	-0.153098	-0.202467
HOXA7|3204	homeobox A7	UP	2.96248	51	17	6	195	0.00189398	168	1	149	0.819709	0.219776
SPAG5|10615	sperm associated antigen 5	UP	2.96312	46	3	21	200	0.00187402	168	1	154	0.477511	0.297519
CNOT7|29883	CCR4-NOT transcription complex subunit 7	DOWN	2.96921	43	2	21	200	0.00175134	188	1	198	-0.0829538	-0.164154
BUB1|699	BUB1 mitotic checkpoint serine/threonine kinase	UP	2.97006	35	3	21	200	0.00172514	188	1	210	0.414001	0.299078
HOXA3|3200	homeobox A3	UP	2.97076	39	17	6	195	0.001691	188	1	221	0.508603	0.20754
TRIM35|23087	tripartite motif containing 35	DOWN	2.97284	22	2	21	200	0.00178361	266	1	186	-0.266708	-0.159181
PPP2R2A|5520	protein phosphatase 2 regulatory subunit Balpha	DOWN	2.97559	24	2	21	200	0.00168749	266	1	225	-0.21866	-0.120693
WRN|7486	WRN RecQ like helicase		2.97606	10	2	21	200	0.00177442	356	1	191	-0.105875	-0.102551
HOXA6|3203	homeobox A6	UP	2.9762	21	17	6	195	0.00166718	266	1	236	0.497753	0.17643
VPS37A|137492	VPS37A subunit of ESCRT-I	DOWN	2.9768	29	2	21	200	0.00157142	222	1	304	-0.159142	-0.203247
TRIP13|9319	thyroid hormone receptor interactor 13	UP	2.97731	15	3	21	200	0.00163043	266	1	259	0.487636	0.275184
ZNF395|55893	zinc finger protein 395	DOWN	2.97739	11	2	21	200	0.00172561	356	1	209	-0.179401	-0.128245
FUT10|84750	fucosyltransferase 10	DOWN	2.97887	19	2	21	200	0.00157756	266	1	300	-0.180016	-0.206727
KIF4A|24137	kinesin family member 4A	UP	2.97897	15	3	21	200	0.00157145	266	1	303	0.327603	0.258305
FDFT1|2222	farnesyl-diphosphate farnesyltransferase 1	DOWN	2.97974	21	2	21	200	0.00151575	266	1	329	0.00535158	-0.147517
NCAPH|23397	non-SMC condensin I complex subunit H	UP	2.98191	9	3	21	200	0.00157002	356	1	307	0.440193	0.286567
GSG2|83903	histone H3 associated protein kinase	UP	2.98274	13	3	21	200	0.00150231	356	1	336	0.233175	0.21221
CDCA5|113130	cell division cycle associated 5	UP	2.98329	10	3	21	200	0.00146028	356	1	358	0.328929	0.252621
MAK16|84549	MAK16 homolog		2.98445	0	2	21	200	0.00146169	419	1	354	-0.0188428	-0.069478
ERI1|90459	exoribonuclease 1		2.98543	0	2	21	200	0.00136433	419	1	401	-0.0229087	-0.0988281
RAD54L|8438	ATRX chromatin remodeler	UP	2.98585	3	3	21	200	0.00126778	419	1	425	0.315916	0.224057
FBXO25|26260	F-box protein 25	DOWN	2.98595	2	2	21	200	0.0012388	419	1	431	-0.172819	-0.181597
PINX1|54984	PIN2 (TERF1) interacting telomerase inhibitor 1		2.98606	0	2	21	200	0.00119149	419	1	438	0.0392659	-0.0538085
RAD51|5888	RAD51 recombinase	UP	2.98616	1	3	21	200	0.00117403	419	1	445	0.335235	0.254717
MCM10|55388	minichromosome maintenance 10 replication initiation factor	UP	2.98634	0	3	21	200	0.00113189	419	1	457	0.372789	0.253373
PLK1|5347	polo like kinase 1	UP	2.98635	2	3	21	200	0.00112455	419	1	458	0.385761	0.258856
CDCA8|55143	cell division cycle associated 8	UP	2.98638	0	3	21	200	0.00109904	419	1	460	0.276594	0.230232
ORC1L|4998	origin recognition complex subunit 1	UP	2.98645	0	3	21	200	0.00108945	419	1	465	0.126613	0.177418
CSTF1|1477	cleavage stimulation factor subunit 1	UP	2.98646	0	74	2	200	0.00108804	419	1	466	0.144571	0.164248
CDC20|991	cell division cycle 20	UP	2.98654	0	3	21	200	0.00105527	419	1	472	0.337879	0.199269
POLR3D|661	RNA polymerase III subunit D		2.98657	0	2	21	200	0.00104328	419	1	474	-0.0775003	-0.101455
FOXM1|2305	forkhead box M1	UP	2.98658	0	3	21	200	0.00104184	419	1	475	0.346306	0.231508
MRPS17|51373	mitochondrial ribosomal protein S17	UP	2.98666	0	27	4	200	0.000984413	419	1	481	0.502802	0.20404
UBXN8|7993	UBX domain protein 8		2.98678	0	2	21	200	0.000949537	419	1	490	-0.0614913	-0.067395
ERICH1|157697	glutamate rich 1		2.98701	0	2	21	200	0.000874597	419	1	510	-0.122261	-0.0949578
KPNA2|3838	karyopherin subunit alpha 2	UP	2.98715	0	3	21	200	0.000845295	419	1	522	0.267007	0.208138
CHCHD2|51142	coiled-coil-helix-coiled-coil-helix domain containing 2	UP	2.98716	0	27	4	200	0.000842926	419	1	523	0.527289	0.133621
CDC6|990	cell division cycle 6	UP	2.98722	0	3	21	200	0.000830687	419	1	529	0.428572	0.210087
CCT6A|908	chaperonin containing TCP1 subunit 6A	UP	2.98739	0	27	4	200	0.000798421	419	1	545	0.578013	0.193007
CDC45|8318	cell division cycle 45	UP	2.98745	0	3	21	200	0.000783063	419	1	551	0.388535	0.235634
PARP8|79668	poly(ADP-ribose) polymerase family member 8	DOWN	17.3891	192	237	1	192	0.00371136	17	73	10	-0.408027	-0.292009
FAM64A|54478	PICALM interacting mitotic regulator	UP	23.4233	190	239	1	190	0.00315044	17	73	18	0.692724	0.331492
DOCK5|80005	dedicator of cytokinesis 5	DOWN	23.9705	188	242	1	188	0.00313003	17	73	19	-0.545948	-0.238591
ADAM28|10863	ADAM metallopeptidase domain 28	DOWN	25.4287	193	236	1	193	0.00306664	17	73	22	-1.10736	-0.307934
DTHD1|401124	death domain containing 1	DOWN	26.2589	168	263	1	168	0.00341363	46	109	12	-1.38755	-0.29035
NCAPG|64151	non-SMC condensin I complex subunit G	UP	27.0686	183	75	2	183	0.00319649	31	84	15	0.376673	0.271213
GPR18|2841	G protein-coupled receptor 18	DOWN	27.7171	192	238	1	192	0.00300397	17	73	28	-0.777531	-0.246089
TTC9|23508	tetratricopeptide repeat domain 9	DOWN	29.4308	187	243	1	187	0.00291209	17	73	34	-0.488948	-0.242851
MDM2|4193	MDM2 proto-oncogene	UP	30.7622	194	50	2	194	0.00280659	17	73	40	1.55369	0.00346718
KCNRG|283518	potassium channel regulator	DOWN	31.3224	187	244	1	187	0.00272003	17	73	43	-0.524228	-0.163912
TSPAN31|6302	tetraspanin 31	UP	32.1352	190	51	2	190	0.00264796	17	73	48	1.31851	0.0773531
KIF15|56992	kinesin family member 15	UP	32.6862	175	255	1	175	0.00311728	31	84	21	0.519152	0.300516
HOXA11|3207	homeobox A11	UP	34.2305	184	32	3	184	0.00305088	31	84	23	0.144074	0.124469
KIF13B|23303	kinesin family member 13B	DOWN	34.953	178	253	1	178	0.00304551	31	84	24	-0.433858	-0.294388
UCKL1|54963	uridine-cytidine kinase 1 like 1	UP	35.6452	180	42	3	180	0.00304486	31	84	25	0.333068	0.279162
SYK|6850	spleen associated tyrosine kinase	DOWN	36.9459	177	254	1	177	0.00300981	31	84	27	-0.364506	-0.237623
CCT2|10576	chaperonin containing TCP1 subunit 2	UP	40.2869	184	52	2	185	0.00291239	31	84	33	0.915706	0.263445
CDC42SE2|56990	CDC42 small effector 2	DOWN	42.1408	175	256	1	175	0.002836	31	84	37	-0.340868	-0.305764
PFDN4|5203	prefoldin subunit 4	UP	42.5661	185	245	1	185	0.00281132	31	84	38	0.39819	0.266745
HOXA1|3198	homeobox A1	UP	45.1909	181	247	1	181	0.0026934	31	84	45	0.466617	0.267054
PCDH7|5099	protocadherin 7	DOWN	46.695	170	77	2	170	0.00294276	46	109	30	-0.379349	-0.244947
ITGB7|3695	integrin subunit beta 7	DOWN	46.756	184	246	1	184	0.0025787	31	84	50	-0.506252	-0.246372
PSTPIP1|9051	proline-serine-threonine phosphatase interacting protein 1	DOWN	47.5958	179	252	1	179	0.00255192	31	84	53	-0.358244	-0.262377
AKNA|80709	AT-hook transcription factor	DOWN	48.2599	170	259	1	170	0.00292093	46	109	32	-0.445865	-0.304675
OS9|10956	OS9 endoplasmic reticulum lectin	UP	50.7716	179	33	3	181	0.00236161	31	84	67	0.991186	0.0738591
CYP27B1|1594	cytochrome P450 family 27 subfamily B member 1	UP	53.8559	159	278	1	159	0.00287711	52	115	36	0.83651	0.259152
MLLT3|4300	MLLT3 super elongation complex subunit	DOWN	57.3431	160	44	3	160	0.00276426	52	115	41	-0.152987	-0.274069
ORAOV1|220064	LTO1 maturation factor of ABCE1	UP	58.6078	168	22	4	177	0.00254429	46	84	57	0.949285	0.261853
TCF19|6941	transcription factor 19	UP	59.2257	159	45	3	159	0.00269379	52	115	44	0.173443	0.202212
STX19|415117	syntaxin 19	DOWN	59.8274	173	258	1	173	0.00255496	46	109	52	-0.375241	-0.235379
C10orf95|79946	chromosome 10 open reading frame 95	DOWN	59.9587	153	281	1	153	0.00280747	61	125	39	-0.750092	-0.210369
CDCA2|157313	cell division cycle associated 2		62.0674	165	264	1	165	0.00262649	52	115	49	0.000817968	0.073382
AVIL|10677	advillin	UP	64.4628	174	257	1	174	0.00242146	46	109	64	0.894445	0.127587
PDRG1|81572	p53 and DNA damage regulated 1	UP	65.0643	156	279	1	156	0.00254524	52	115	55	0.35176	0.295813
TMEM194A|23306	nuclear envelope integral membrane protein 1	UP	67.6334	140	294	1	140	0.0026918	67	130	46	0.291312	0.270843
PRC1|9055	protein regulator of cytokinesis 1	UP	68.346	143	291	1	143	0.00268581	67	130	47	0.295906	0.286956
SGOL2|151246	shugoshin 2	UP	70.3692	162	265	1	162	0.00234982	52	115	68	0.357162	0.295651
PPFIA1|8500	PTPRF interacting protein alpha 1	UP	71.0652	135	22	4	177	0.00237797	67	84	65	0.601145	0.19511
CCDC108|255101	cilia and flagella associated protein 65	DOWN	73.0636	151	284	1	151	0.00249806	61	125	60	-1.25811	-0.233249
ELP3|55140	elongator acetyltransferase complex subunit 3	DOWN	74.033	153	280	1	153	0.00246073	61	125	62	-0.225725	-0.272241
NLRC3|197358	NLR family CARD domain containing 3	DOWN	77.1482	151	283	1	151	0.00234596	61	125	69	-0.566683	-0.289886
HOXC9|3225	homeobox C9	UP	79.3664	133	11	7	144	0.00252872	76	130	59	0.712256	0.297882
TOP2A|7153	DNA topoisomerase II alpha	UP	79.4298	144	290	1	144	0.00237344	67	130	66	0.569517	0.322367
ESR1|2099	estrogen receptor 1	DOWN	84.6544	143	292	1	143	0.00222165	67	130	78	-0.141752	-0.244853
CXCR6|10663	C-X-C motif chemokine receptor 6	DOWN	85.4271	138	298	1	138	0.0022142	67	130	80	-0.59288	-0.197334
GZMK|3003	granzyme K	DOWN	87.2259	152	282	1	152	0.00208704	61	125	100	-0.552603	-0.21471
CXCR3|2833	C-X-C motif chemokine receptor 3	DOWN	89.9001	141	293	1	141	0.00214077	67	130	93	-0.589046	-0.233155
NUF2|83540	NUF2 component of NDC80 kinetochore complex	UP	90.5307	133	29	4	133	0.00223092	76	143	77	0.556354	0.31503
CENPL|91687	centromere protein L	UP	91.7652	121	80	2	121	0.00230964	80	154	73	0.336826	0.277926
MARCH9|92979	membrane associated ring-CH-type finger 9	UP	92.1145	111	51	2	190	0.00195687	89	73	131	1.54451	0.0701634
SHOX2|6474	short stature homeobox 2	UP	92.8021	116	315	1	116	0.0023065	80	154	75	0.604693	0.271119
FAM179A|165186	TOG array regulator of axonemal microtubules 2	DOWN	97.0928	115	317	1	115	0.0021916	80	154	84	-1.17279	-0.267739
RSPO1|284654	R-spondin 1	DOWN	97.3553	114	319	1	114	0.00233686	89	182	71	-0.131025	-0.233229
MAP6D1|79929	MAP6 domain containing 1	UP	97.9773	111	321	1	111	0.00231339	89	182	72	0.132158	0.233961
TAF4|6874	TATA-box binding protein associated factor 4	UP	98.8235	117	81	2	117	0.00217059	80	154	88	0.228797	0.246721
KCTD9|54793	potassium channel tetramerization domain containing 9	DOWN	99.2067	68	53	2	125	0.00246097	136	154	61	-0.250482	-0.0986534
CD5|921	CD5 molecule	DOWN	101.243	123	308	1	123	0.00213942	80	154	94	-0.777684	-0.231387
FASLG|356	Fas ligand	DOWN	101.403	128	306	1	128	0.00206512	76	143	106	-0.699693	-0.224668
TBC1D10C|374403	TBC1 domain family member 10C	DOWN	102.006	131	299	1	131	0.00205899	76	143	108	-0.405784	-0.221792
CENPN|55839	centromere protein N	UP	103.294	97	54	2	122	0.00220654	98	154	81	0.199539	0.205625
IFT52|51098	intraflagellar transport 52	UP	103.714	111	322	1	111	0.00220401	89	182	82	0.2604	0.225528
GTF2E2|2961	general transcription factor IIE subunit 2	DOWN	105.403	99	53	2	125	0.00218432	98	154	85	-0.164572	-0.116393
TNIP1|10318	TNFAIP3 interacting protein 1	DOWN	106.29	114	318	1	114	0.00217164	89	182	87	-0.206091	-0.241883
CCR4|1233	CCR4-NOT transcription complex subunit 6	DOWN	106.505	115	82	2	115	0.00205353	80	154	109	-1.08061	-0.16494
NUDT18|79873	nudix hydrolase 18	DOWN	106.821	119	314	1	119	0.00204862	80	154	110	-0.186737	-0.263761
YEATS4|8089	YEATS domain containing 4	UP	108.321	105	52	2	185	0.00179416	98	84	179	0.917541	0.210436
TTC7B|145567	tetratricopeptide repeat domain 7B	UP	111.659	115	316	1	115	0.0019831	80	154	127	0.274866	0.220851
C10orf26|54838	WW domain binding protein 1 like	DOWN	112.649	114	320	1	114	0.00208041	89	182	101	-0.174978	-0.263156
C9orf25|203259	family with sequence similarity 219 member A	UP	115.059	104	339	1	104	0.00215374	98	200	92	0.0420242	0.20279
ENTPD4|9583	ectonucleoside triphosphate diphosphohydrolase 4	DOWN	115.226	124	307	1	124	0.00191999	80	154	142	-0.225109	-0.228538
GSR|2936	glutathione-disulfide reductase	DOWN	116.553	107	334	1	107	0.00204437	89	182	111	-0.390485	-0.186086
USP54|159195	ubiquitin specific peptidase 54	DOWN	116.594	102	340	1	102	0.0021364	98	200	95	-0.654868	-0.28572
C5orf34|375444	chromosome 5 open reading frame 34	UP	117.036	86	92	1	86	0.00217449	109	207	86	0.477555	0.27931
FAM160B2|64760	family with sequence similarity 160 member B2	DOWN	118.072	105	335	1	105	0.00210257	98	200	98	-0.195821	-0.242111
NLRX1|79671	NLR family member X1	DOWN	118.553	104	337	1	104	0.00209641	98	200	99	-0.258125	-0.222142
CBX7|23492	chromobox 7	DOWN	118.853	93	55	2	93	0.00216892	109	207	89	-0.596955	-0.193578
MAD2L1|4085	mitotic arrest deficient 2 like 1	UP	119.962	104	338	1	104	0.00207651	98	200	102	0.352657	0.254818
MRPL36|64979	mitochondrial ribosomal protein L36	UP	121.782	98	8	9	117	0.00198696	98	154	126	0.345978	0.276058
ZNF385B|151126	zinc finger protein 385B	DOWN	122.841	90	89	1	90	0.00213459	109	207	96	-1.1057	-0.265602
CD3E|916	CD3e molecule	DOWN	122.97	109	34	3	116	0.00189308	89	154	150	-0.511774	-0.207856
FAF1|11124	Fas associated factor 1	UP	123.383	91	88	1	91	0.00210343	109	207	97	0.0605263	0.203764
TRIM8|81603	tripartite motif containing 8	DOWN	126.435	82	101	1	82	0.00216204	120	227	91	-0.22225	-0.2509
DDIT3|1649	DNA damage inducible transcript 3	UP	126.696	95	86	1	95	0.00201747	98	200	118	0.749545	0.247984
UBE2C|11065	ubiquitin conjugating enzyme E2 C	UP	127.008	90	90	1	90	0.00206675	109	207	104	0.596236	0.296673
HOXC8|3224	homeobox C8	UP	127.16	71	11	7	144	0.00201915	136	130	117	0.443555	0.269977
CLIC5|53405	chloride intracellular channel 5	DOWN	127.255	90	20	5	130	0.00194104	109	143	135	-0.749466	-0.276165
MLH1|4292	mutL homolog 1		133.161	71	23	4	71	0.00216468	136	246	90	0.0962065	0.143431
EEF1B2|1933	eukaryotic translation elongation factor 1 beta 2	DOWN	133.939	105	336	1	105	0.00192678	98	200	139	-0.264548	-0.199437
CKAP2L|150468	cytoskeleton associated protein 2 like	UP	134.756	78	102	1	78	0.00206529	120	227	105	0.400577	0.300583
C5orf33|133686	NAD kinase 2%2C mitochondrial	UP	135.53	92	87	1	92	0.00200152	109	207	123	0.279721	0.204691
C20orf111|51526	oxidative stress responsive serine rich 1	UP	138.965	75	105	1	75	0.00203838	120	227	113	0.228047	0.243724
FAM119B|25895	EEF1A lysine methyltransferase 3	UP	139.071	38	33	3	181	0.00168282	188	84	230	1.56212	0.176101
KDELR2|11014	KDEL endoplasmic reticulum protein retention receptor 2	UP	139.379	91	56	2	91	0.00194467	109	207	133	0.225516	0.158765
ERAL1|26284	Era like 12S mitochondrial rRNA chaperone 1	UP	141.898	79	35	3	79	0.00201511	120	227	119	0.253678	0.226267
CTNNBL1|56259	catenin beta like 1	UP	142.369	85	96	1	85	0.00201284	120	227	120	0.21188	0.266019
C6orf97|80129	coiled-coil domain containing 170	DOWN	142.802	84	20	5	130	0.00180394	120	143	176	-0.67242	-0.278477
LTB|4050	lymphotoxin beta	DOWN	142.836	83	99	1	83	0.00200152	120	227	121	-0.140997	-0.216685
NAT1|9	solute carrier family 6 member 2	UP	145.977	83	98	1	83	0.00197207	120	227	128	1.01499	-0.165894
SLC35E3|55508	solute carrier family 35 member E3	UP	146.092	17	50	2	194	0.00153688	266	73	325	1.30383	0.0353438
MUC16|94025	mucin 16%2C cell surface associated	DOWN	146.836	84	97	1	84	0.00195709	120	227	130	-0.323135	-0.181987
MAD2L2|10459	mitotic arrest deficient 2 like 2	UP	147.445	70	110	1	70	0.00203868	136	246	112	0.416706	0.236185
IPCEF1|26034	interaction protein for cytohesin exchange factors 1	DOWN	147.679	76	103	1	76	0.00194491	120	227	132	-0.639738	-0.301833
SHCBP1|79801	SHC binding and spindle associated 1	UP	148.083	57	54	2	122	0.00192662	151	154	140	0.291475	0.257526
PRKCQ|5588	protein kinase C theta	DOWN	148.79	59	119	1	59	0.00207207	151	261	103	-0.720407	-0.246627
MIPOL1|145282	mirror-image polydactyly 1		149.78	87	57	2	88	0.00183511	109	207	166	-0.0408506	-0.082527
C17orf37|84299	migration and invasion enhancer 1	UP	150.584	89	91	1	89	0.00182505	109	207	169	1.66695	0.133621
HOXA10|3206	homeobox A10	UP	151.076	30	32	3	184	0.00159326	222	84	290	0.412109	0.123219
MPV17L|255027	MPV17 mitochondrial inner membrane protein like	UP	153.521	85	95	1	85	0.00189858	120	227	147	0.256762	0.181261
CYP4X1|260293	cytochrome P450 family 4 subfamily X member 1	DOWN	153.984	74	108	1	74	0.00199223	136	246	124	-0.592508	-0.2423
HOXC5|3222	homeobox C5	UP	154.466	37	11	7	144	0.00185883	188	130	156	0.742752	0.247628
RPL3|6122	ribosomal protein L3	DOWN	154.496	74	106	1	74	0.00199	136	246	125	-0.224235	-0.243482
SNTN|132203	sentan%2C cilia apical structure protein	DOWN	154.772	73	5	12	111	0.00187403	136	182	153	-2.08855	-0.169663
ACAP1|9744	ArfGAP with coiled-coil%2C ankyrin repeat and PH domains 1	DOWN	155.016	86	93	1	86	0.0017832	109	207	187	-0.468259	-0.219279
MED10|84246	mediator complex subunit 10	UP	155.836	56	8	9	117	0.00184011	151	154	163	0.222973	0.264554
ZNF883|169834	zinc finger protein 883	UP	157.277	64	114	1	64	0.00203355	151	261	116	0.451016	0.201809
FTSJ2|29960	mitochondrial rRNA methyltransferase 2	UP	158.313	75	104	1	75	0.00184422	120	227	161	0.134891	0.235016
CKS1B|1163	CDC28 protein kinase regulatory subunit 1B	UP	158.893	74	109	1	74	0.00194349	136	246	134	0.452148	0.267054
PNPT1|87178	polyribonucleotide nucleotidyltransferase 1	UP	160.28	74	107	1	74	0.00193826	136	246	137	0.236182	0.262028
EPB49|2039	dematin actin binding protein	DOWN	162.073	73	59	2	73	0.00192534	136	246	141	-0.456263	-0.247964
HOXC4|3221	homeobox C4	UP	163.384	53	11	7	144	0.00172098	168	130	212	0.706524	0.245081
MBD2|8932	methyl-CpG binding domain protein 2		163.973	49	132	1	49	0.00203702	168	280	114	-0.092165	-0.0795839
CASP1|834	caspase 1	DOWN	164.659	49	63	2	49	0.00203432	168	280	115	-0.303217	-0.0762243
AGPAT3|56894	1-acylglycerol-3-phosphate O-acyltransferase 3	DOWN	164.782	57	121	1	57	0.00195921	151	261	129	-0.168582	-0.210746
HOXA9|3205	homeobox A9		165.608	12	32	3	184	0.00158734	356	84	294	0.0161066	0.116601
NDC80|10403	NDC80 kinetochore complex component	UP	167.033	7	75	2	183	0.00156942	356	84	308	0.471116	0.270252
UBASH3A|53347	ubiquitin associated and SH3 domain containing A	DOWN	167.661	85	94	1	85	0.00176715	120	227	194	-0.760638	-0.225132
DEPDC1|55635	DEP domain containing 1	UP	168.659	68	111	1	68	0.0018579	136	246	157	0.284372	0.244396
CD2|914	CD2 molecule	DOWN	168.871	41	34	3	116	0.00182768	188	154	168	-0.526847	-0.204187
CD3G|917	CD3g molecule	DOWN	169.05	74	46	2	78	0.00183296	136	227	167	-0.821027	-0.163757
DPM1|8813	dolichyl-phosphate mannosyltransferase subunit 1%2C catalytic	UP	169.123	85	58	2	85	0.00173655	120	227	200	0.283961	0.285868
BIN3|55909	bridging integrator 3	DOWN	171.639	67	60	2	67	0.00183537	136	246	165	-0.206774	-0.184056
RNF114|55905	ring finger protein 114	UP	174.31	59	118	1	59	0.00189631	151	261	148	0.143265	0.204792
SKA3|221150	spindle and kinetochore associated complex subunit 3	UP	176.13	59	117	1	59	0.00187672	151	261	152	0.389406	0.244638
IGDCC4|57722	immunoglobulin superfamily DCC subclass member 4	UP	177.641	83	100	1	83	0.0016639	120	227	241	0.795528	0.0763183
MRPS27|23107	mitochondrial ribosomal protein S27	DOWN	177.759	47	64	2	47	0.00193887	168	280	136	-0.155067	-0.20158
ANKLE1|126549	ankyrin repeat and LEM domain containing 1	UP	178.889	53	129	1	53	0.00193067	168	280	138	0.607426	0.220811
ST6GALNAC1|55808	ST6 N-acetylgalactosaminide alpha-2%2C6-sialyltransferase 1	DOWN	179.462	64	12	7	88	0.00177794	151	207	190	-0.821828	-0.26528
PCMT1|5110	protein-L-isoaspartate (D-aspartate) O-methyltransferase	UP	179.544	66	112	1	66	0.00177972	136	246	189	0.15285	0.230668
INTS5|80789	integrator complex subunit 5	DOWN	179.598	56	124	1	56	0.00184475	151	261	160	-0.140951	-0.220085
CTDSP2|10106	CTD small phosphatase 2	UP	179.754	5	33	3	181	0.00129038	419	84	417	0.622419	0.061052
FADD|8772	Fas associated via death domain	UP	181.504	0	22	4	177	0.00117277	419	84	447	0.573606	0.157112
GPR174|84636	G protein-coupled receptor 174	DOWN	181.633	52	131	1	52	0.0019123	168	280	143	-0.862569	-0.161896
CCNB2|9133	cyclin B2	UP	183.227	48	133	1	48	0.00189888	168	280	146	0.432755	0.281541
RTEL1|51750	regulator of telomere elongation helicase 1	UP	184.101	0	42	3	180	0.00092417	419	84	499	0.182057	0.0857926
CTTN|2017	cortactin	UP	184.281	0	22	4	177	0.000894128	419	84	503	0.686546	0.0311643
KIF23|9493	kinesin family member 23	UP	184.412	57	120	1	57	0.00181772	151	261	172	0.426005	0.285236
JHDM1D|80853	lysine demethylase 7A	DOWN	185.173	62	115	1	62	0.00181096	151	261	174	-0.247914	-0.195748
NOP56|10528	NOP56 ribonucleoprotein	UP	186.661	64	36	3	65	0.00179621	151	261	178	0.218159	0.264326
NPEPL1|79716	aminopeptidase like 1	UP	186.748	0	42	3	180	0.000752475	419	84	564	0.29319	0.13987
TMED6|146456	transmembrane p24 trafficking protein 6	DOWN	187.749	61	116	1	61	0.00179237	151	261	181	-0.50172	-0.0877211
WDR67|93594	TBC1 domain family member 31	UP	187.788	46	24	4	50	0.0018706	168	280	155	0.370367	0.287467
PER2|8864	period circadian regulator 2	DOWN	188.461	65	113	1	65	0.00179111	151	261	183	-0.284654	-0.221859
HOXC6|3223	homeobox C6	UP	190.102	27	11	7	144	0.00160779	222	130	279	0.585827	0.253299
BLM|641	BLM RecQ like helicase	UP	191.496	54	62	2	55	0.0018204	168	261	170	0.404304	0.28486
PLEKHG7|440107	pleckstrin homology and RhoGEF domain containing G7	DOWN	191.543	62	61	2	62	0.00176942	151	261	192	-0.560764	-0.25727
ERLIN1|10613	ER lipid raft associated 1	DOWN	192.321	21	216	1	21	0.00206434	266	401	107	-0.174831	-0.123192
CDC25A|993	cell division cycle 25A	UP	193.076	38	152	1	38	0.00190062	188	301	145	0.358549	0.254502
LDLRAD1|388633	low density lipoprotein receptor class A domain containing 1	DOWN	193.629	34	5	12	111	0.00179221	222	182	182	-1.46979	-0.21553
YWHAB|7529	tyrosine 3-monooxygenase/tryptophan 5-monooxygenase activation protein beta	UP	198.036	56	122	1	56	0.001717	151	261	213	0.138075	0.215221
MCM6|4175	minichromosome maintenance complex component 6		199.328	5	45	3	159	0.00164816	419	115	252	0.0764467	0.143807
TMEM203|94107	transmembrane protein 203	UP	200.827	56	123	1	56	0.00169063	151	261	223	0.212391	0.184083
WDHD1|11169	WD repeat and HMG-box DNA binding protein 1	UP	200.928	45	136	1	45	0.00184855	188	301	159	0.0912387	0.149385
PIGR|5284	polymeric immunoglobulin receptor	DOWN	201.133	50	12	7	88	0.00166353	168	207	242	-0.801266	-0.250907
C11orf16|56673	chromosome 11 open reading frame 16	DOWN	202.296	37	5	12	111	0.00165229	188	182	249	-0.782602	-0.182128
STARD3|10948	StAR related lipid transfer domain containing 3	UP	206.912	47	134	1	47	0.0017364	168	280	201	0.991869	0.166593
EIF3L|51386	eukaryotic translation initiation factor 3 subunit L	DOWN	207.048	42	143	1	42	0.00181844	188	301	171	-0.222138	-0.210221
RAI2|10742	retinoic acid induced 2	DOWN	207.145	33	20	5	130	0.00150635	222	143	335	-0.486371	-0.237274
UQCC|55245	ubiquinol-cytochrome c reductase complex assembly factor 1	UP	208.019	43	140	1	43	0.00181117	188	301	173	0.144116	0.18321
CCDC150|284992	coiled-coil domain containing 150	UP	208.65	47	65	2	47	0.00172904	168	280	206	0.537543	0.246748
MUC5B|727897	mucin 5B%2C oligomeric mucus/gel-forming	DOWN	208.976	40	147	1	40	0.00180637	188	301	175	-0.649719	-0.219467
TRIB3|57761	tribbles pseudokinase 3	UP	208.99	53	125	1	53	0.00172711	168	280	207	0.347389	0.25465
KRT10|3858	keratin 10		209.581	32	9	9	32	0.00190102	222	349	144	-0.21793	0.238429
PTK2B|2185	protein tyrosine kinase 2 beta	DOWN	211.313	43	141	1	43	0.00179281	188	301	180	-0.360789	-0.211673
SAE1|10055	SUMO1 activating enzyme subunit 1	UP	218.286	45	66	2	45	0.00176559	188	301	196	0.145848	0.254179
SPRED2|200734	sprouty related EVH1 domain containing 2	UP	219.514	41	25	4	41	0.001746	188	301	199	0.16649	0.176033
MKNK2|2872	MAPK interacting serine/threonine kinase 2	DOWN	220.5	46	135	1	46	0.00165572	168	280	245	-0.128231	-0.183841
ATP9B|374868	ATPase phospholipid transporting 9B (putative)	DOWN	220.72	41	146	1	41	0.00173636	188	301	202	-0.20995	-0.204053
RILPL1|353116	Rab interacting lysosomal protein like 1	UP	221.037	52	130	1	52	0.00165479	168	280	247	0.213545	0.164624
PLEKHA2|59339	pleckstrin homology domain containing A2		221.611	0	77	2	170	0.000882433	419	109	506	-0.00321761	-0.102954
ATP6V1B2|526	ATPase H+ transporting V1 subunit B2	DOWN	221.831	53	128	1	53	0.00164977	168	280	250	-0.31489	-0.231354
KIAA1797|54914	focadhesin	DOWN	223.477	1	44	3	160	0.00126019	419	115	427	-0.105038	-0.177707
FAM46C|54855	terminal nucleotidyltransferase 5C	DOWN	224.203	42	142	1	42	0.00172144	188	301	211	-0.721648	-0.249395
C10orf114|399726	MIR1915 host gene	UP	225.69	37	67	2	40	0.00171101	188	301	215	0.685699	0.172781
MURC|347273	caveolae associated protein 4		226.42	44	138	1	44	0.001702	188	301	217	-0.14135	0.201312
PTN|5764	pleiotrophin	UP	227.268	53	126	1	53	0.00161598	168	280	272	0.926882	0.0799871
FCRL6|343413	Fc receptor like 6	DOWN	227.499	41	145	1	41	0.00169274	188	301	220	-0.988244	-0.241426
WDR76|79968	WD repeat domain 76		228.964	0	45	3	159	0.000939802	419	115	495	0.00874099	0.114908
BSPRY|54836	B-box and SPRY domain containing	DOWN	229.6	38	153	1	38	0.00168694	188	301	226	-0.299418	-0.198967
ISPD|729920	CDP-L-ribitol pyrophosphorylase A	UP	229.943	40	148	1	40	0.00168564	188	301	227	0.203824	0.14796
GPR171|29909	G protein-coupled receptor 171	DOWN	230.623	39	150	1	39	0.00168477	188	301	229	-0.796793	-0.208757
C20orf85|128602	chromosome 20 open reading frame 85	DOWN	231.368	34	5	12	111	0.00149983	222	182	337	-2.28835	-0.187389
KIAA0415|9907	adaptor related protein complex 5 subunit zeta 1	UP	232.997	23	203	1	23	0.00188042	266	401	151	0.198082	0.171646
HOXC10|3226	homeobox C10	UP	233.486	6	11	7	144	0.00126698	356	130	426	0.484251	0.237583
WDR63|126820	WD repeat domain 63	DOWN	234.29	29	175	1	29	0.00179086	222	349	184	-0.506239	-0.212782
KLHL9|55958	kelch like family member 9		235.416	0	44	3	160	0.00067223	419	115	602	-0.0901248	-0.0819895
CHEK1|1111	checkpoint kinase 1		236.426	34	162	1	34	0.00178112	222	349	188	0.103792	0.132499
C16orf54|283897	chromosome 16 open reading frame 54	DOWN	236.711	44	139	1	44	0.00165451	188	301	248	-0.852745	-0.233054
EME1|146956	essential meiotic structure-specific endonuclease 1	UP	236.809	53	127	1	53	0.00155247	168	280	318	0.632004	0.288865
TOM1|10043	target of myb1 membrane trafficking protein	DOWN	238.797	37	155	1	37	0.00164468	188	301	255	-0.218356	-0.242111
CNDP2|55748	carnosine dipeptidase 2	DOWN	239.088	39	151	1	39	0.00164361	188	301	256	-0.243539	-0.248307
AMPD3|272	adenosine monophosphate deaminase 3	DOWN	239.378	38	154	1	38	0.00163971	188	301	257	-0.517691	-0.240062
MYBL2|4605	MYB proto-oncogene like 2	UP	240.038	27	183	1	27	0.0017667	222	349	195	0.517657	0.279659
TIFAB|497189	TIFA inhibitor	DOWN	240.84	32	69	2	35	0.00170492	222	301	216	-0.544098	-0.195002
INPP4A|3631	inositol polyphosphate-4-phosphatase type I A		241.042	26	188	1	26	0.00176519	222	349	197	0.0868697	0.108316
CPVL|54504	carboxypeptidase vitellogenic like		241.429	23	6	12	23	0.00184186	266	401	162	0.0664366	0.0696259
HOXC11|3227	homeobox C11	UP	241.742	3	11	7	144	0.00124404	419	130	429	0.747768	0.236239
TNFAIP6|7130	TNF alpha induced protein 6	UP	242.195	37	156	1	37	0.00162142	188	301	267	0.451321	0.222955
ORMDL3|94103	ORMDL sphingolipid biosynthesis regulator 3	UP	242.901	19	240	1	19	0.00183787	266	401	164	0.526214	0.0772322
C20orf107|388799	family with sequence similarity 209 member B	UP	243.983	26	21	5	26	0.00173298	222	349	203	0.410175	0.153685
CCDC6|8030	coiled-coil domain containing 6		244.08	37	157	1	37	0.00161217	188	301	274	-0.0680635	-0.141543
SCEL|8796	sciellin	DOWN	244.463	30	171	1	30	0.00173102	222	349	204	-0.96616	-0.129522
DUSP12|11266	dual specificity phosphatase 12	UP	245.899	35	158	1	35	0.00160471	188	301	281	0.255172	0.256477
SCUBE1|80274	signal peptide%2C CUB domain and EGF like domain containing 1	DOWN	247.408	39	149	1	39	0.00159844	188	301	287	-0.359344	-0.227289
ABCF1|23	ATP binding cassette subfamily F member 1	UP	248.631	39	68	2	39	0.00158902	188	301	292	0.177173	0.223821
POLL|27343	DNA polymerase lambda	DOWN	249.113	30	172	1	30	0.00171448	222	349	214	-0.125748	-0.223889
CDHR4|389118	cadherin related family member 4	DOWN	251.965	18	5	12	111	0.00142982	266	182	377	-2.06529	-0.195842
C8orf79|57604	tRNA methyltransferase 9B (putative)	DOWN	252.04	25	192	1	25	0.00179805	266	401	177	0.104195	-0.205928
CSE1L|1434	chromosome segregation 1 like	UP	253.504	31	170	1	31	0.00169054	222	349	224	0.314953	0.280654
TMEM66|51669	store-operated calcium entry associated regulatory factor	DOWN	253.893	41	144	1	41	0.00156288	188	301	315	-0.251876	-0.220354
TAGAP|117289	T cell activation RhoGTPase activating protein	DOWN	257.032	44	137	1	44	0.00151503	188	301	330	-0.749486	-0.206983
CALU|813	calumenin	UP	257.253	30	173	1	30	0.0016729	222	349	233	0.0588179	0.158254
DAPL1|92196	death associated protein like 1	DOWN	257.321	17	262	1	17	0.0017848	266	401	185	0.0320059	-0.16797
RASGEF1B|153020	RasGEF domain family member 1B	DOWN	258.861	27	182	1	27	0.00166649	222	349	237	-0.457878	-0.23898
ZNF516|9658	zinc finger protein 516	DOWN	259.257	28	177	1	28	0.00166399	222	349	238	-0.25915	-0.223526
IL5RA|3568	interleukin 5 receptor subunit alpha	DOWN	259.652	31	168	1	31	0.00166393	222	349	239	-0.966659	-0.230547
TTK|7272	TTK protein kinase	UP	260.601	0	29	4	133	0.00107051	419	143	469	0.420233	0.261114
WDR70|55100	WD repeat domain 70	UP	261.209	31	165	1	31	0.00165869	222	349	243	0.219349	0.234962
ARMC3|219681	armadillo repeat containing 3	DOWN	261.593	30	174	1	30	0.00165826	222	349	244	-1.22465	-0.237119
IK|3550	potassium calcium-activated channel subfamily N member 4		262.364	23	204	1	23	0.0017679	266	401	193	-0.0798321	-0.138022
SLC40A1|30061	solute carrier family 40 member 1	DOWN	264.088	0	20	5	130	0.000882701	419	143	505	-0.447852	-0.152005
CDK1|983	cyclin dependent kinase 1	UP	264.897	0	29	4	133	0.000870078	419	143	514	0.327974	0.211135
DACH1|1602	dachshund family transcription factor 1	DOWN	265.939	0	20	5	130	0.000835256	419	143	526	-0.189594	-0.116527
BHLHA15|168620	basic helix-loop-helix family member a15	DOWN	266.766	27	185	1	27	0.00163283	222	349	258	-0.60536	-0.198772
BRD9|65980	bromodomain containing 9		268.106	0	8	9	117	0.00122468	419	154	433	0.124974	0.115868
SIT1|27240	signaling threshold regulating transmembrane adaptor 1	DOWN	268.526	31	166	1	31	0.00162811	222	349	263	-0.609279	-0.207104
NEK2|4751	NIMA related kinase 2	UP	268.765	0	29	4	133	0.000756621	419	143	561	0.35663	0.212318
MAP7D3|79649	MAP7 domain containing 3	UP	269.512	15	287	1	15	0.00172912	266	401	205	0.169577	0.184177
IL2RB|3560	interleukin 2 receptor subunit beta	DOWN	269.56	31	169	1	31	0.00162229	222	349	266	-0.470309	-0.194525
CCDC127|133957	coiled-coil domain containing 127		270.213	0	8	9	117	0.00116283	419	154	450	0.112905	0.121943
C1orf112|55732	chromosome 1 open reading frame 112	UP	270.333	3	80	2	121	0.0011543	419	154	451	0.390503	0.272335
EYA2|2139	EYA transcriptional coactivator and phosphatase 2		270.58	26	190	1	26	0.00161833	222	349	269	0.0124965	-0.051833
CD3D|915	CD3d molecule	DOWN	270.926	0	34	3	116	0.00114051	419	154	456	-0.367322	-0.184748
RAB36|9609	RAB36%2C member RAS oncogene family		271.227	16	271	1	16	0.00172701	266	401	208	-0.111709	-0.0420228
STAC|6769	SH3 and cysteine rich domain	UP	271.251	27	181	1	27	0.0016163	222	349	271	0.27778	0.12666
DIDO1|11083	death inducer-obliterator 1		271.625	0	81	2	117	0.00109509	419	154	462	0.0895092	0.105715
FAHD2B|151313	fumarylacetoacetate hydrolase domain containing 2B	UP	272.574	26	189	1	26	0.00161172	222	349	275	0.288222	0.192899
MON1B|22879	MON1 homolog B%2C secretory trafficking associated	DOWN	272.9	31	70	2	31	0.00161078	222	349	276	-0.193906	-0.221127
ZNF622|90441	zinc finger protein 622		273.636	0	8	9	117	0.00099476	419	154	480	0.129579	0.12033
PDCD6|10016	programmed cell death 6	UP	274.066	0	8	9	117	0.000959396	419	154	484	0.178914	0.137868
NDUFS6|4726	NADH:ubiquinone oxidoreductase subunit S6	UP	274.385	0	8	9	117	0.000953161	419	154	487	0.351035	0.170645
SPC25|57405	SPC25 component of NDC80 kinetochore complex	UP	275.143	34	159	1	34	0.00160125	222	349	283	0.418138	0.292923
SDHA|6389	succinate dehydrogenase complex flavoprotein subunit A		275.426	0	8	9	117	0.00093698	419	154	497	0.0194056	0.0304118
CNTFR|1271	ciliary neurotrophic factor receptor	UP	275.458	33	163	1	33	0.00160117	222	349	284	0.508904	0.11476
THEMIS|387357	thymocyte selection associated	DOWN	277.444	16	13	7	41	0.00162034	266	301	268	-0.600201	-0.189035
SLPI|6590	secretory leukocyte peptidase inhibitor	DOWN	278.221	30	26	4	30	0.00158817	222	349	293	-0.405593	-0.172365
CLNK|116449	cytokine dependent hematopoietic cell linker	DOWN	278.605	27	13	7	41	0.00149698	222	301	340	-0.103215	-0.182854
NUDT1|4521	nudix hydrolase 1	UP	279.116	34	161	1	34	0.00158155	222	349	296	0.415362	0.276676
RPAP3|79657	RNA polymerase II associated protein 3	UP	280.581	28	179	1	28	0.00157695	222	349	301	0.230715	0.180119
CCR8|1237	C-C motif chemokine receptor 8	DOWN	282.018	0	82	2	115	0.000728905	419	154	569	-0.234875	-0.106938
EXOC3|11336	exocyst complex component 3		282.984	0	8	9	117	0.000711324	419	154	581	0.0183173	0.00206284
CTBP2|1488	C-terminal binding protein 2	DOWN	283.496	21	218	1	21	0.00168258	266	401	231	-0.163912	-0.197925
FRS2|10818	fibroblast growth factor receptor substrate 2	UP	283.997	17	73	2	23	0.00167423	266	401	232	0.983604	0.127869
ASPM|259266	abnormal spindle microtubule assembly	UP	284.99	17	43	3	17	0.00167084	266	401	234	0.315498	0.233269
ZNF772|400720	zinc finger protein 772	UP	285.484	23	196	1	23	0.0016693	266	401	235	0.140993	0.111514
PGR|5241	progesterone receptor	DOWN	285.588	28	180	1	28	0.00154868	222	349	319	-1.47917	-0.253131
SEPT1|1731	septin 1	DOWN	286.385	34	160	1	34	0.00154426	222	349	322	-0.372429	-0.219669
GAL|51083	galanin and GMAP prepropeptide	UP	287.913	19	14	7	19	0.00166391	266	401	240	1.33611	0.223385
REEP4|80346	receptor accessory protein 4		290.748	16	270	1	16	0.00165495	266	401	246	-0.0713563	0.0217976
KLRK1|22914	killer cell lectin like receptor K1	DOWN	291.195	27	184	1	27	0.00149232	222	349	341	-0.559314	-0.245901
CDC25B|994	cell division cycle 25B	UP	291.679	29	176	1	29	0.00149029	222	349	343	0.349193	0.232973
PRSS27|83886	serine protease 27	DOWN	293.048	21	7	10	21	0.00164851	266	401	251	-0.72233	0.00106166
BCR|613	BCR activator of RhoGEF and GTPase	DOWN	293.952	24	71	2	24	0.00164793	266	401	253	-0.324276	-0.217116
PTX3|5806	paired like homeodomain 3	UP	294.04	26	187	1	26	0.00146266	222	349	353	2.04938	0.169596
NOXO1|124056	NADPH oxidase organizer 1	DOWN	294.401	23	198	1	23	0.00164627	266	401	254	-0.0114559	-0.149183
S1PR4|8698	sphingosine-1-phosphate receptor 4	DOWN	294.501	28	178	1	28	0.00146072	222	349	355	-0.507229	-0.227692
SORBS2|8470	sorbin and SH3 domain containing 2	DOWN	294.73	32	164	1	32	0.00146069	222	349	356	-0.496613	-0.238577
RPS6KA1|6195	ribosomal protein S6 kinase A1	DOWN	295.86	31	167	1	31	0.00145709	222	349	361	-0.160435	-0.192388
EYA4|2070	EYA transcriptional coactivator and phosphatase 4	UP	297.05	23	207	1	23	0.00162962	266	401	260	1.22898	0.190635
ENPP3|5169	ectonucleotide pyrophosphatase/phosphodiesterase 3	DOWN	297.484	18	251	1	18	0.00162888	266	401	261	-0.0378626	-0.242253
ANKRD44|91526	ankyrin repeat domain 44	DOWN	297.916	15	289	1	15	0.00162838	266	401	262	-0.584378	-0.158274
STAU1|6780	staufen double-stranded RNA binding protein 1	UP	298.774	24	194	1	24	0.00162545	266	401	264	0.171627	0.21432
HEXIM2|124790	HEXIM P-TEFb complex subunit 2		299.2	23	206	1	23	0.00162528	266	401	265	-0.0779571	-0.129327
SLC25A21|89874	solute carrier family 25 member 21	DOWN	301.287	5	57	2	88	0.00144197	419	207	365	-0.384273	-0.149754
LEPROTL1|23484	leptin receptor overlapping transcript like 1	DOWN	301.3	23	202	1	23	0.00161782	266	401	270	-0.180447	-0.204537
ARHGAP11A|9824	Rho GTPase activating protein 11A	UP	302.195	27	186	1	27	0.00139397	222	349	391	0.284282	0.223882
C2orf54|79919	mab-21 like 4	DOWN	302.536	16	276	1	16	0.00161276	266	401	273	-0.4386	-0.13307
BCL2L15|440603	BCL2 like 15	DOWN	303.888	7	12	7	88	0.00116511	356	207	448	-1.03344	-0.192066
IGF1|3479	insulin like growth factor 1	DOWN	304.159	22	209	1	22	0.00160964	266	401	277	0.0690638	-0.23937
GNB3|2784	G protein subunit beta 3	UP	304.56	16	273	1	16	0.00160811	266	401	278	0.38	0.172654
TUBA4B|80086	tubulin alpha 4b	DOWN	305.174	0	5	12	111	0.000870446	419	182	513	-1.20288	-0.130832
CCDC17|149483	coiled-coil domain containing 17	DOWN	306.79	0	5	12	111	0.00083391	419	182	527	-0.728845	-0.0705733
TIRAP|114609	TIR domain containing adaptor protein	DOWN	307.316	15	285	1	15	0.00159934	266	401	285	-0.0581587	-0.197683
SRPR|6734	SRP receptor subunit alpha		308.471	21	37	3	21	0.0015955	266	401	288	0.0350053	-0.123838
CXCR5|643	C-X-C motif chemokine receptor 5	DOWN	308.853	25	191	1	25	0.00159349	266	401	289	-1.05669	-0.207964
DCDC2B|149069	doublecortin domain containing 2B	DOWN	309.194	0	5	12	111	0.000791242	419	182	549	-1.97374	-0.120008
ARSD|414	arylsulfatase D	DOWN	309.611	23	208	1	23	0.00159007	266	401	291	-0.269494	-0.15351
P2RY10|27334	P2Y receptor family member 10	DOWN	310.583	11	46	2	78	0.00134297	356	227	409	-0.914797	-0.186495
C20orf4|25980	AAR2 splicing factor	UP	311.107	21	220	1	21	0.00158218	266	401	295	0.153403	0.206862
TMEM190|147744	transmembrane protein 190	DOWN	311.348	0	5	12	111	0.000723808	419	182	570	-1.82098	-0.105581
C1orf186|440712	regulator of hemoglobinization and erythroid cell expansion	DOWN	311.845	25	193	1	25	0.00158128	266	401	297	-0.157315	-0.20627
XPO5|57510	exportin 5	UP	312.212	18	248	1	18	0.00158118	266	401	298	0.235159	0.219682
DAK|26007	triokinase and FMN cyclase	DOWN	312.577	16	275	1	16	0.00158109	266	401	299	-0.119796	-0.196998
FUT6|2528	fucosyltransferase 6	DOWN	312.688	25	18	6	35	0.00137239	266	301	398	-0.289009	-0.177216
CXCL17|284340	C-X-C motif chemokine ligand 17	DOWN	313.098	17	18	6	35	0.00136615	266	301	400	-0.724965	-0.196118
CCDC152|100129792	coiled-coil domain containing 152	UP	313.662	23	72	2	23	0.00157556	266	401	302	0.598116	0.0382667
GZMH|2999	granzyme H	DOWN	314.734	24	195	1	24	0.00157128	266	401	305	-0.425203	-0.18704
TTLL10|254173	tubulin tyrosine ligase like 10	DOWN	314.932	0	5	12	111	0.000654676	419	182	608	-0.626646	-0.106549
TCTEX1D4|343521	Tctex1 domain containing 4	DOWN	315.021	0	5	12	111	0.000646415	419	182	609	-0.380447	-0.121311
BET1|10282	Bet1 golgi vesicular membrane trafficking protein		315.088	19	40	3	19	0.00157116	266	401	306	0.0838461	0.100226
PAM|5066	MYC binding protein 2	DOWN	316.142	21	213	1	21	0.00156876	266	401	309	-0.284022	-0.216323
MYBPC2|4606	myosin binding protein C%2C fast type	DOWN	316.49	21	214	1	21	0.00156822	266	401	310	-1.64453	-0.226106
LPXN|9404	leupaxin	DOWN	317.182	23	201	1	23	0.00156634	266	401	312	-0.440982	-0.231703
APOBEC4|403314	apolipoprotein B mRNA editing enzyme catalytic polypeptide like 4	DOWN	317.756	0	5	12	111	0.000475663	419	182	641	-1.95701	-0.140495
LYN|4067	LYN proto-oncogene%2C Src family tyrosine kinase	DOWN	318.548	23	199	1	23	0.00155889	266	401	316	-0.343587	-0.0844622
EEF2|1938	eukaryotic translation elongation factor 2	DOWN	318.886	21	217	1	21	0.00155345	266	401	317	-0.19936	-0.236844
LRFN1|57622	leucine rich repeat and fibronectin type III domain containing 1	UP	320.224	23	200	1	23	0.00154542	266	401	321	0.727977	0.199712
XKRX|402415	XK related X-linked	DOWN	320.885	16	266	1	16	0.00154418	266	401	323	-0.782679	-0.159141
C1orf52|148423	chromosome 1 open reading frame 52	UP	321.213	16	277	1	16	0.00154067	266	401	324	0.191097	0.227342
EPM2AIP1|9852	EPM2A interacting protein 1		322.275	4	23	4	71	0.00146624	419	246	350	-0.00557648	0.0297667
SLC6A20|54716	solute carrier family 6 member 20	DOWN	322.399	0	12	7	88	0.000995223	419	207	479	-0.641463	-0.190621
IGF2BP3|10643	insulin like growth factor 2 mRNA binding protein 3	UP	322.513	19	28	4	19	0.00152415	266	401	328	0.459175	0.211149
PTPRCAP|5790	protein tyrosine phosphatase receptor type C associated protein	DOWN	323.474	23	197	1	23	0.00151367	266	401	331	-0.425732	-0.220381
TMEM199|147007	transmembrane protein 199	UP	325.411	4	35	3	79	0.0013355	419	227	412	0.185557	0.202736
MARCKS|4082	myristoylated alanine rich protein kinase C substrate	UP	326.899	18	250	1	18	0.00149062	266	401	342	0.18503	0.174206
KCNMA1|3778	potassium calcium-activated channel subfamily M alpha 1	DOWN	327.183	11	328	1	11	0.00169986	356	564	218	-0.589718	-0.206492
SLC18A2|6571	solute carrier family 18 member A2	DOWN	327.506	17	260	1	17	0.00148728	266	401	344	-0.400207	-0.23046
EZH1|2145	enhancer of zeste 1 polycomb repressive complex 2 subunit	DOWN	327.536	0	55	2	93	0.00086739	419	207	515	-0.207832	-0.067086
C19orf44|84167	chromosome 19 open reading frame 44	UP	327.932	12	313	1	12	0.00169546	356	564	219	0.222413	0.0519809
ALDH2|217	aldehyde dehydrogenase 2 family member	DOWN	328.407	21	221	1	21	0.00147256	266	401	347	-0.596224	-0.262149
PSRC1|84722	proline and serine rich coiled-coil 1	UP	328.705	16	76	2	18	0.00147108	266	401	348	0.784117	0.205343
GCHFR|2644	GTP cyclohydrolase I feedback regulator	DOWN	329.002	21	38	3	21	0.00146745	266	401	349	-0.0162598	-0.19339
MFHAS1|9258	malignant fibrous histiocytoma amplified sequence 1	DOWN	329.885	19	241	1	19	0.00146267	266	401	352	-0.264089	-0.177754
C7orf42|55069	transmembrane protein 248		330.159	10	30	4	10	0.00169079	356	564	222	0.102096	0.140555
SNX20|124460	sorting nexin 20	DOWN	331.907	21	212	1	21	0.00145946	266	401	359	-0.659035	-0.258923
TCF25|22980	transcription factor 25	DOWN	332.757	18	249	1	18	0.00145188	266	401	362	-0.197166	-0.223055
TMEFF1|8577	transmembrane protein with EGF like and two follistatin like domains 1	UP	333.038	20	225	1	20	0.00144584	266	401	363	0.323104	0.206351
GZMM|3004	granzyme M	DOWN	334.152	17	261	1	17	0.00143965	266	401	367	-0.341225	-0.201621
HMGB2|3148	high mobility group box 2	UP	334.427	23	205	1	23	0.00143802	266	401	368	0.311896	0.233034
C17orf96|100170841	elongin BC and polycomb repressive complex 2 associated protein	UP	334.523	10	353	1	10	0.00168521	356	564	228	0.396786	0.171908
CFTR|1080	CF transmembrane conductance regulator	DOWN	334.605	0	12	7	88	0.000723114	419	207	572	-0.345271	-0.170947
SYTL3|94120	synaptotagmin like 3	DOWN	334.702	16	268	1	16	0.00143709	266	401	369	-0.313512	-0.22401
COL4A3BP|10087	ceramide transporter 1	DOWN	335.249	20	228	1	20	0.00143615	266	401	371	-0.217336	-0.235634
CHAF1A|10036	chromatin assembly factor 1 subunit A	UP	335.791	20	229	1	20	0.00143296	266	401	373	0.131226	0.188941
SLMO2|51012	PRELI domain containing 3B	UP	336.339	0	58	2	85	0.00106595	419	227	470	0.242562	0.19943
C12orf74|338809	chromosome 12 open reading frame 74	DOWN	336.387	7	61	2	62	0.00119098	356	261	439	-0.714736	-0.235768
KDELR3|11015	KDEL endoplasmic reticulum protein retention receptor 3		336.498	0	56	2	91	0.000698973	419	207	589	0.0890155	0.0365264
TLR3|7098	toll like receptor 3	DOWN	336.597	16	267	1	16	0.00143129	266	401	376	-0.520511	-0.244947
DMBT1|1755	deleted in malignant brain tumors 1	DOWN	337.039	0	12	7	88	0.000686972	419	207	594	-1.52422	-0.148934
DHX35|60625	DEAH-box helicase 35	UP	337.129	22	210	1	22	0.00142829	266	401	378	0.202182	0.243979
GRB7|2886	growth factor receptor bound protein 7	UP	337.657	16	1	26	16	0.00141739	266	401	380	1.42275	0.104755
POLDIP2|26073	DNA polymerase delta interacting protein 2	UP	337.687	0	35	3	79	0.00101014	419	227	478	0.179278	0.116823
NKAIN1|79570	sodium/potassium transporting ATPase interacting 1	UP	337.92	15	286	1	15	0.00141737	266	401	381	1.08633	0.187208
ZFP64|55734	ZFP64 zinc finger protein	UP	338.182	21	211	1	21	0.00141683	266	401	382	0.190574	0.235238
SPN|6693	protein phosphatase 1 regulatory subunit 9B	DOWN	338.702	16	39	3	20	0.00141226	266	401	384	-0.621363	-0.227759
CTSB|1508	cathepsin B	DOWN	339.732	15	288	1	15	0.00140354	266	401	388	-0.067296	-0.168091
RNF144B|255488	ring finger protein 144B	DOWN	339.987	16	269	1	16	0.00140145	266	401	389	-0.0738562	-0.163038
C5orf20|140947	dendritic cell associated nuclear protein	DOWN	340.158	7	69	2	35	0.00143357	356	301	372	-0.681528	-0.216255
PSMD3|5709	proteasome 26S subunit%2C non-ATPase 3	UP	340.998	20	227	1	20	0.00139218	266	401	393	0.444527	0.226805
MS4A8B|83661	membrane spanning 4-domains A8	DOWN	341.968	0	12	7	88	0.000442169	419	207	643	-1.49534	-0.160337
LARP4B|23185	La ribonucleoprotein 4B		343.463	21	215	1	21	0.00136112	266	401	403	-0.0281354	-0.0590429
CFLAR|8837	CASP8 and FADD like apoptosis regulator	DOWN	343.946	21	219	1	21	0.0013528	266	401	405	-0.327058	-0.0916788
C8orf58|541565	chromosome 8 open reading frame 58		344.066	0	60	2	67	0.00118962	419	246	441	-0.0912018	-0.116325
SERPINB1|1992	serpin family B member 1	DOWN	344.186	15	78	2	15	0.00135152	266	401	406	-0.484676	-0.146589
SPC24|147841	SPC24 component of NDC80 kinetochore complex	UP	344.663	20	226	1	20	0.00134775	266	401	408	0.498742	0.265065
FAM81B|153643	family with sequence similarity 81 member B	DOWN	345.842	19	41	3	19	0.00131024	266	401	413	-1.4041	-0.193222
ERBB2|2064	erb-b2 receptor tyrosine kinase 2	UP	346.308	16	274	1	16	0.00130639	266	401	415	1.51384	0.0595872
HKDC1|80201	hexokinase domain containing 1	DOWN	348.14	16	272	1	16	0.00127093	266	401	423	-0.932293	-0.218594
C20orf27|54976	chromosome 20 open reading frame 27	UP	349.107	2	36	3	65	0.00127304	419	261	421	0.18539	0.19177
IDH3B|3420	isocitrate dehydrogenase (NAD(+)) 3 non-catalytic subunit beta	UP	352.459	0	36	3	65	0.0012068	419	261	436	0.163085	0.185051
CENPO|79172	centromere protein O	UP	356.47	2	62	2	55	0.00114236	419	261	455	0.27642	0.276669
ZNF311|282890	zinc finger protein 311	UP	357.902	0	23	4	71	0.000856861	419	246	518	0.298533	0.124879
C2orf74|339804	chromosome 2 open reading frame 74		360.085	0	23	4	71	0.000828313	419	246	532	-0.0427947	0.0211659
ATAD2|29028	ATPase family AAA domain containing 2	UP	361.685	5	24	4	50	0.00125408	419	280	428	0.290086	0.247433
NPM2|10361	nucleophosmin/nucleoplasmin 2	DOWN	364.474	0	59	2	73	0.000755569	419	246	562	-0.224452	-0.0825942
GTPBP4|23560	GTP binding protein 4	UP	367.942	10	349	1	10	0.00160518	356	564	280	0.164776	0.155311
USP1|7398	ubiquitin specific peptidase 1	UP	369.088	10	85	2	10	0.00160329	356	564	282	0.0677083	0.16023
C10orf140|387640	SKI/DACH domain containing 1	UP	369.789	5	67	2	40	0.00129062	419	301	416	0.616657	0.185367
MTBP|27085	MDM2 binding protein	UP	371.232	2	24	4	50	0.00106391	419	280	471	0.420682	0.27642
CNOT2|4848	CCR4-NOT transcription complex subunit 2	UP	371.263	8	73	2	23	0.00145875	356	401	360	0.535327	0.153631
SUN1|23353	Sad1 and UNC84 domain containing 1	UP	371.354	13	300	1	13	0.00159896	356	564	286	0.189243	0.186805
CARD16|114769	caspase recruitment domain family member 16	DOWN	375.442	0	63	2	49	0.000943743	419	280	492	-0.197517	-0.0716014
DHX16|8449	DEAH-box helicase 16	UP	376.348	0	68	2	39	0.001184	419	301	442	0.159476	0.192133
DSCC1|79075	DNA replication and sister chromatid cohesion 1	UP	377.165	0	24	4	50	0.00090232	419	280	501	0.414529	0.247433
PTCD2|79810	pentatricopeptide repeat domain 2		377.354	0	64	2	47	0.000896226	419	280	502	-0.0428522	-0.0118328
FLT3|2322	fms related tyrosine kinase 3	DOWN	378.727	0	13	7	41	0.00115032	419	301	452	-0.0806921	-0.186207
C4orf21|55345	zinc finger GRF-type containing 1	UP	379.937	0	65	2	47	0.000865868	419	280	516	0.235298	0.192644
FUT3|2525	fucosyltransferase 3 (Lewis blood group)	DOWN	382.378	0	18	6	35	0.00107078	419	301	468	-0.370113	-0.135583
MORN5|254956	MORN repeat containing 5	DOWN	383.239	12	4	14	19	0.00137898	356	401	396	-0.925243	-0.200525
RACGAP1|29127	Rac GTPase activating protein 1	UP	384.74	10	346	1	10	0.00156688	356	564	311	0.30809	0.27552
PDCD1|5133	programmed cell death 1	DOWN	385.757	14	295	1	14	0.00156461	356	564	313	-0.442702	-0.182229
FKBP9|11328	FKBP prolyl isomerase 9	UP	386.262	10	350	1	10	0.00156333	356	564	314	0.251064	0.188572
ZNF831|128611	zinc finger protein 831	DOWN	388.348	0	13	7	41	0.000937552	419	301	496	-0.706197	-0.205457
SPRY4|81848	sprouty RTK signaling antagonist 4		389.161	0	25	4	41	0.000908564	419	301	500	0.126715	0.0810756
R3HCC1|203069	R3H domain and coiled-coil containing 1	DOWN	389.255	12	309	1	12	0.00154788	356	564	320	-0.128695	-0.180374
DUSP6|1848	dual specificity phosphatase 6		391.542	0	25	4	41	0.000871562	419	301	512	-0.0358642	-0.0123098
EPHB2|2048	EPH receptor B2	UP	392.181	11	84	2	11	0.00153208	356	564	326	0.350027	0.170618
ARFGAP1|55738	ADP ribosylation factor GTPase activating protein 3	UP	392.663	14	297	1	14	0.00153107	356	564	327	0.2801	0.184036
KIAA0748|9840	thymocyte expressed%2C positive selection associated 1	DOWN	393.083	0	13	7	41	0.000850265	419	301	520	-0.683078	-0.209765
STX18|53407	syntaxin 18	DOWN	395.044	10	344	1	10	0.00151227	356	564	332	-0.247653	-0.213265
CYP7B1|9420	cytochrome P450 family 7 subfamily B member 1	DOWN	395.515	11	331	1	11	0.0015099	356	564	333	-0.498004	-0.155815
STAT4|6775	signal transducer and activator of transcription 4	DOWN	395.697	0	13	7	41	0.000827675	419	301	534	-0.514225	-0.179863
SDF2|6388	stromal cell derived factor 2	UP	395.985	11	83	2	11	0.00150765	356	564	334	0.196641	0.183861
ETV4|2118	ETS variant transcription factor 4		396.425	0	25	4	41	0.000808321	419	301	538	0.108553	0.0805918
PPP5C|5536	protein phosphatase 5 catalytic subunit	UP	396.966	0	66	2	45	0.000801556	419	301	541	0.100282	0.158698
ZBBX|79740	zinc finger B-box domain containing	DOWN	397.088	7	4	14	19	0.00117778	356	401	444	-1.58354	-0.186838
GARS|2617	phosphoribosylglycinamide formyltransferase%2C phosphoribosylglycinamide synthetase%2C phosphoribosylaminoimidazole synthetase	UP	397.845	13	302	1	13	0.00149963	356	564	338	0.181064	0.202891
SYTL1|84958	synaptotagmin like 1	DOWN	398.306	10	343	1	10	0.00149845	356	564	339	-0.262295	-0.140246
MUC20|200958	mucin 20%2C cell surface associated		399.43	0	18	6	35	0.000777969	419	301	555	0.0292385	-0.0805515
MAP4K1|11184	mitogen-activated protein kinase kinase kinase kinase 1	DOWN	401.038	11	327	1	11	0.00148288	356	564	345	-0.376706	-0.185145
ARMC4|55130	armadillo repeat containing 4	DOWN	401.488	13	305	1	13	0.00148211	356	564	346	-0.998819	-0.231918
MUC4|4585	mucin 4%2C cell surface associated	DOWN	402.628	0	18	6	35	0.000719505	419	301	574	-0.697955	-0.103612
GPR110|266977	adhesion G protein-coupled receptor F1		402.955	0	18	6	35	0.000718013	419	301	576	-0.073115	-0.0907179
CCR5|1234	C-C motif chemokine receptor 5 (gene/pseudogene)	DOWN	402.982	3	39	3	20	0.00140021	419	401	390	-0.558944	-0.19945
CD6|923	CD6 molecule	DOWN	403.712	11	332	1	11	0.00146282	356	564	351	-0.392637	-0.198409
TUBB|203068	tubulin beta class I	UP	406.33	13	79	2	13	0.00146062	356	564	357	0.294748	0.244477
TXNDC3|51314	NME/NM23 family member 8	DOWN	409.317	10	342	1	10	0.00144208	356	564	364	-0.804682	-0.185521
IL12B|3593	interleukin 12B	DOWN	409.881	0	13	7	41	0.000608288	419	301	621	-0.402701	-0.0575042
WDR62|284403	WD repeat domain 62	UP	410.157	10	341	1	10	0.00144004	356	564	366	0.299382	0.235204
ALCAM|214	activated leukocyte cell adhesion molecule	DOWN	411.82	10	354	1	10	0.00143651	356	564	370	-0.326829	-0.197898
FUT2|2524	fucosyltransferase 2	DOWN	412.067	0	26	4	30	0.000943029	419	349	493	-0.467301	-0.154558
PDZK1IP1|10158	PDZK1 interacting protein 1	DOWN	412.3	0	26	4	30	0.000942857	419	349	494	-0.402129	-0.143875
FZD7|8324	frizzled class receptor 7	UP	413.46	12	312	1	12	0.00143243	356	564	374	0.359834	0.178493
FANCD2|2177	FA complementation group D2	UP	413.867	10	352	1	10	0.00143199	356	564	375	0.371536	0.245579
IGF2BP2|10644	insulin like growth factor 2 mRNA binding protein 2	UP	414.428	0	28	4	19	0.00126867	419	401	424	0.212574	0.142544
SIKE1|80143	suppressor of IKBKE 1	UP	415.48	11	10	9	11	0.00142257	356	564	379	0.153085	0.216054
LCN2|3934	lipocalin 2	DOWN	416.152	0	26	4	30	0.000873315	419	349	511	-0.639078	-0.141832
ADRA2B|151	adrenoceptor alpha 2B	UP	417.072	11	333	1	11	0.00141585	356	564	383	0.63532	0.184036
TNFRSF10A|8797	TNF receptor superfamily member 10a	DOWN	417.86	11	324	1	11	0.0014055	356	564	385	-0.454574	-0.13604
HPS6|79803	HPS6 biogenesis of lysosomal organelles complex 2 subunit 3	DOWN	418.252	12	310	1	12	0.00140414	356	564	386	-0.147048	-0.210504
SEPP1|6414	selenoprotein P	UP	418.484	0	72	2	23	0.00119724	419	401	437	0.211234	-0.0585793
FBXO18|84893	F-box DNA helicase 1		418.643	10	351	1	10	0.00140363	356	564	387	0.0189311	-0.00288932
SLFN12L|342615	schlafen family member 12 like	DOWN	420.577	13	301	1	13	0.00139318	356	564	392	-0.557388	-0.0822986
WWP2|11060	WW domain containing E3 ubiquitin protein ligase 2	DOWN	421.282	0	70	2	31	0.000825347	419	349	535	-0.182842	-0.150769
NUSAP1|51203	nucleolar and spindle associated protein 1	UP	421.342	11	326	1	11	0.00138968	356	564	394	0.307404	0.249301
HOXD13|3239	homeobox D13	UP	421.722	12	311	1	12	0.00138232	356	564	395	0.596951	0.247312
ITGAL|3683	integrin subunit alpha L	DOWN	422.085	2	39	3	20	0.00116329	419	401	449	-0.627595	-0.236172
DLL3|10683	delta like canonical Notch ligand 3	UP	422.48	13	303	1	13	0.00137306	356	564	397	-0.0301436	0.161479
CNR2|1269	protocadherin alpha 6	DOWN	423.232	13	304	1	13	0.00136901	356	564	399	-1.43424	-0.162507
STMN1|3925	stathmin 1	UP	423.256	2	76	2	18	0.00114943	419	401	453	0.259115	0.17639
PSMB10|5699	proteasome 20S subunit beta 10	DOWN	424.352	8	15	7	11	0.00136358	356	564	402	-0.0670236	-0.171263
FAM32A|26017	family with sequence similarity 32 member A	UP	425.093	11	329	1	11	0.0013539	356	564	404	0.210642	0.159275
STT3A|3703	STT3 oligosaccharyltransferase complex catalytic subunit A		425.556	0	37	3	21	0.00109721	419	401	461	-0.0252408	-0.0586599
FAM24B|196792	family with sequence similarity 24 member B	UP	425.89	0	21	5	26	0.000763658	419	349	558	0.175045	0.144325
PNPLA1|285848	patatin like phospholipase domain containing 1	UP	426.084	0	9	9	32	0.000759451	419	349	559	0.0860142	0.16023
TNFRSF10B|8795	TNF receptor superfamily member 10b	DOWN	426.194	11	323	1	11	0.0013494	356	564	407	-0.247839	-0.151911
ALOXE3|59344	arachidonate lipoxygenase 3		426.277	0	9	9	32	0.000759378	419	349	560	0.117447	0.0755658
FRMPD2|143162	FERM and PDZ domain containing 2	DOWN	426.405	3	4	14	19	0.0010941	419	401	464	-0.811833	-0.200774
THEM5|284486	thioesterase superfamily member 5		427.236	0	9	9	32	0.000748802	419	349	565	-0.0266856	-0.0630006
MSL1|339287	small nuclear ribonucleoprotein polypeptide B2	UP	427.286	10	347	1	10	0.00134082	356	564	410	0.23231	0.185199
CUZD1|50624	CUB and zona pellucida like domains 1		427.427	0	21	5	26	0.000737428	419	349	566	0.121278	0.108847
CD27|939	CD27 molecule	DOWN	427.647	14	296	1	14	0.00133551	356	564	411	-0.454416	-0.207292
IKZF2|22807	IKAROS family zinc finger 2	DOWN	428.725	10	348	1	10	0.00130944	356	564	414	-0.2401	-0.190319
CENPF|1063	centromere protein F	UP	428.904	0	43	3	17	0.00105159	419	401	473	0.385916	0.248629
DGCR2|9993	DiGeorge syndrome critical region gene 2		429.723	0	71	2	24	0.00102604	419	401	476	-0.132765	-0.115553
SNRPD1|6632	small nuclear ribonucleoprotein D2 polypeptide	UP	430.146	12	19	6	12	0.00128991	356	564	418	0.299641	0.258359
E2F1|1869	E2F transcription factor 1	UP	430.498	11	330	1	11	0.00128385	356	564	419	0.419173	0.265522
ASMT|438	acetylserotonin O-methyltransferase		430.587	0	21	5	26	0.000709119	419	349	583	0.0731511	0.0660781
RASAL3|64926	RAS protein activator like 3	DOWN	430.849	11	325	1	11	0.00127906	356	564	420	-0.445931	-0.235876
PRRG2|5639	proline rich and Gla domain 2		431.339	0	1	26	16	0.000983998	419	401	482	0.00439883	-0.100831
IGF2BP1|10642	insulin like growth factor 2 mRNA binding protein 1		432.136	0	28	4	19	0.000954952	419	401	485	0.114563	0.140226
ST14|6768	suppression of tumorigenicity 14		432.927	0	1	26	16	0.000951339	419	401	488	-0.103475	-0.1199
HMGA2|8091	high mobility group AT-hook 2	UP	433.189	0	28	4	19	0.000949889	419	401	489	0.738596	0.0847444
KIF14|9928	kinesin family member 14	UP	433.71	0	43	3	17	0.000945552	419	401	491	0.411169	0.248602
CD52|1043	CD52 molecule	DOWN	434.303	6	16	7	11	0.00123968	356	564	430	-0.630107	-0.18966
RP9|6100	RP9 pre-mRNA splicing factor	UP	434.981	10	345	1	10	0.00123501	356	564	432	0.265634	0.207587
AKR1A1|10327	aldo-keto reductase family 1 member A1		437.029	0	38	3	21	0.000888161	419	401	504	-0.0629779	-0.133258
C9orf169|375791	cysteine rich tail 1	DOWN	437.778	0	7	10	21	0.000881612	419	401	507	-0.654459	-0.0503548
ALOX12B|242	arachidonate 12-lipoxygenase%2C 12R type		437.994	0	9	9	32	0.000587739	419	349	626	-0.0168502	-0.00811025
SQRDL|58472	sulfide quinone oxidoreductase	DOWN	438.026	0	78	2	15	0.000879583	419	401	508	-0.361378	-0.117387
SLC4A5|57835	solute carrier family 4 member 4		438.274	0	14	7	19	0.000877593	419	401	509	0.0939695	0.0495619
KRT1|3848	keratin 1		438.482	0	9	9	32	0.000565432	419	349	629	-0.0166773	0.00569801
SBSN|374897	suprabasin	DOWN	438.644	0	9	9	32	0.000561697	419	349	630	-0.338842	0.0973365
PLA2G4D|283748	phospholipase A2 group IVD	DOWN	439.606	0	9	9	32	0.000535325	419	349	636	-0.165493	-0.0079893
C20orf106|200232	family with sequence similarity 209 member A	UP	439.765	0	21	5	26	0.000529705	419	349	637	0.240304	0.0483524
DSG1|1828	desmoglein 1	DOWN	440.082	0	9	9	32	0.000512126	419	349	639	-0.210272	0.0960934
RSPH4A|345895	radial spoke head component 4A	DOWN	440.229	0	4	14	19	0.000858343	419	401	517	-0.61192	-0.16494
C1orf192|257177	cilia and flagella associated protein 126	DOWN	440.711	0	4	14	19	0.000853662	419	401	519	-0.585357	-0.184412
C17orf72|92340	proline rich 29	DOWN	441.904	0	41	3	19	0.000837959	419	401	524	-0.592045	-0.105749
KCTD11|147040	potassium channel tetramerization domain containing 11		442.141	0	7	10	21	0.000836168	419	401	525	0.0296159	-0.0834341
LSR|51599	lipolysis stimulated lipoprotein receptor		442.848	0	1	26	16	0.000831455	419	401	528	0.106275	-0.0237999
C2orf39|92749	dynein regulatory complex subunit 1	DOWN	443.315	0	41	3	19	0.000828891	419	401	530	-0.801932	-0.0604136
GATAD1|57798	GATA zinc finger domain containing 1		445.389	0	40	3	19	0.000805008	419	401	539	0.0509851	0.0221066
VWA3A|146177	von Willebrand factor A domain containing 3A	DOWN	446.069	0	4	14	19	0.000800712	419	401	542	-0.601393	-0.140562
GLTP|51228	glycolipid transfer protein	DOWN	446.294	0	7	10	21	0.000800638	419	401	543	-0.147862	-0.0397853
DPAGT1|1798	dolichyl-phosphate N-acetylglucosaminephosphotransferase 1		446.519	0	37	3	21	0.000799602	419	401	544	0.0531677	0.00149841
C1orf230|284485	regulatory subunit of type II PKA R-subunit domain containing 1	DOWN	446.967	0	4	14	19	0.000798039	419	401	546	-0.372434	-0.182968
SLC39A2|29986	solute carrier family 39 member 2		447.413	0	7	10	21	0.000792061	419	401	548	0.0264613	8.06e-05
CRB3|92359	crumbs cell polarity complex component 3	DOWN	447.856	0	1	26	16	0.00078738	419	401	550	-0.114634	-0.162474
CCDC135|84229	dynein regulatory complex subunit 7	DOWN	448.516	0	4	14	19	0.000779055	419	401	553	-0.588328	-0.172425
TMEM106A|113277	transmembrane protein 106A	DOWN	448.735	0	6	12	23	0.000778601	419	401	554	-0.146595	-0.109163
C1orf210|149466	chromosome 1 open reading frame 210		449.172	0	1	26	16	0.000771916	419	401	556	-0.0984942	-0.11689
C1orf172|126695	keratinocyte differentiation factor 1		449.389	0	1	26	16	0.000765787	419	401	557	0.028152	-0.00979681
SCNN1A|6337	sodium channel epithelial 1 alpha subunit	DOWN	451.742	0	1	26	16	0.000730846	419	401	568	-0.152248	-0.129428
NCCRP1|342897	NCCRP1%2C F-box associated domain containing		452.372	0	7	10	21	0.000723552	419	401	571	-0.0282698	0.0457991
CNKSR1|10256	connector enhancer of kinase suppressor of Ras 1		452.789	0	1	26	16	0.000720437	419	401	573	0.0242373	-0.0271193
KIAA1751|85452	cilia and flagella associated protein 74	DOWN	453.204	0	4	14	19	0.000718294	419	401	575	-0.437859	-0.0555892
PRSS22|64063	serine protease 22		453.617	0	1	26	16	0.000717969	419	401	577	-0.0686002	-0.0732812
RTDR1|27156	radial spoke head 14 homolog		453.823	0	4	14	19	0.000715839	419	401	578	-0.0441686	-0.0889104
CD163|9332	CD163 molecule		454.233	0	6	12	23	0.000711582	419	401	580	-0.100192	-0.00061818
MSR1|4481	macrophage scavenger receptor 1	DOWN	455.047	0	6	12	23	0.000709113	419	401	584	-0.22626	0.0355521
OLAH|55301	oleoyl-ACP hydrolase		455.249	0	14	7	19	0.000708699	419	401	585	-0.120482	0.100481
ACTL8|81569	actin like 8		455.45	0	14	7	19	0.000706756	419	401	586	0.129513	0.140804
CNFN|84518	cornifelin	DOWN	455.652	0	7	10	21	0.00070603	419	401	587	-0.411881	0.0112616
MTHFD2|10797	methylenetetrahydrofolate dehydrogenase (NADP+ dependent) 2%2C methenyltetrahydrofolate cyclohydrolase		455.852	0	14	7	19	0.000705354	419	401	588	0.0612965	0.0558109
CHMP4C|92421	charged multivesicular body protein 4C		456.252	0	1	26	16	0.000698468	419	401	590	0.0198029	-0.0118664
RNF222|643904	ring finger protein 222	DOWN	456.451	0	7	10	21	0.000693638	419	401	591	-0.236533	0.0172754
CIB1|10519	calcium and integrin binding 1		456.65	0	38	3	21	0.000692891	419	401	592	-0.00347034	-0.108907
ESRP2|80004	epithelial splicing regulatory protein 2		456.848	0	1	26	16	0.000687469	419	401	593	0.00837711	0.0015992
TMEM79|84283	transmembrane protein 79		457.635	0	7	10	21	0.000685042	419	401	597	0.023155	0.0772187
YSK4|80122	mitogen-activated protein kinase kinase kinase 19	DOWN	458.026	0	4	14	19	0.000680133	419	401	599	-0.968286	-0.15857
SPINT2|10653	serine peptidase inhibitor%2C Kunitz type 2	UP	458.22	0	1	26	16	0.000679805	419	401	600	0.185446	-0.0309896
ELMO3|79767	engulfment and cell motility 3		458.415	0	1	26	16	0.00067652	419	401	601	0.0318317	-0.042641
RAB25|57111	RAB25%2C member RAS oncogene family		458.802	0	1	26	16	0.00067023	419	401	603	-0.0798999	-0.0895151
TEX19|400629	testis expressed 19	DOWN	458.994	0	14	7	19	0.000669764	419	401	604	-0.54678	0.101019
SIGLEC1|6614	sialic acid binding Ig like lectin 1		459.187	0	6	12	23	0.000666208	419	401	605	0.0685978	-0.0374671
FCGR2A|2212	Fc fragment of IgG receptor IIa	DOWN	459.378	0	6	12	23	0.000664712	419	401	606	-0.165169	0.0078482
IFT20|90410	intraflagellar transport 20	UP	459.464	0	83	2	11	0.001273	419	564	422	0.269754	0.150796
AP1M2|10053	adaptor related protein complex 1 subunit mu 2		459.57	0	1	26	16	0.00066077	419	401	607	0.0621159	-0.0553069
MS4A6A|64231	membrane spanning 4-domains A6A		460.33	0	6	12	23	0.000633022	419	401	611	-0.132431	-0.0483726
FCGR3A|2214	Fc fragment of IgG receptor IIIb	DOWN	460.708	0	6	12	23	0.000632213	419	401	613	-0.15959	0.0169328
TMEM184A|202915	transmembrane protein 184A		460.896	0	1	26	16	0.000624062	419	401	614	-0.0209322	-0.0278584
ELF3|1999	E74 like ETS transcription factor 3		461.27	0	1	26	16	0.000619695	419	401	616	0.0354413	-0.0339461
PRSS8|5652	serine protease 8		461.457	0	1	26	16	0.000619254	419	401	617	0.005437	-0.14292
FOLR2|2350	folate receptor beta	UP	461.643	0	6	12	23	0.000617285	419	401	618	0.296771	-0.092727
CBLC|23624	Cbl proto-oncogene C	UP	461.829	0	1	26	16	0.000616197	419	401	619	0.177093	-0.0216766
MS4A7|58475	membrane spanning 4-domains A7		462.014	0	6	12	23	0.000609551	419	401	620	0.0409776	-0.0346046
C20orf151|140893	RBBP8 N-terminal like	UP	462.384	0	1	26	16	0.00059629	419	401	622	0.179653	-0.0524378
OVOL2|58495	ovo like zinc finger 2		462.568	0	1	26	16	0.000591309	419	401	623	0.0350503	-0.0589152
C7orf23|79161	transmembrane protein 243		462.751	0	40	3	19	0.000590778	419	401	624	-0.0833785	-0.00134387
CCDC64B|146439	BICD family like cargo adaptor 2		462.934	0	1	26	16	0.00059028	419	401	625	-0.10161	-0.105373
MPP1|4354	membrane palmitoylated protein 1		463.299	0	6	12	23	0.000583739	419	401	627	-0.0579342	-0.0604607
CLDN4|1364	claudin 4		463.481	0	1	26	16	0.000583502	419	401	628	0.0221013	-0.0520615
GRHL2|79977	grainyhead like transcription factor 2		464.024	0	1	26	16	0.000558416	419	401	631	0.0762876	0.0261786
CYBA|1535	cytochrome b-245 alpha chain	DOWN	464.121	3	15	7	11	0.0012206	419	564	434	-0.0942451	-0.167419
MS4A4A|51338	membrane spanning 4-domains A4A		464.204	0	6	12	23	0.000556017	419	401	632	0.0337322	-0.0281944
CLDN7|1366	claudin 7		464.383	0	1	26	16	0.000551646	419	401	633	-0.0780318	-0.0707547
CSDE1|7812	cold shock domain containing E1		464.502	0	10	9	11	0.00121217	419	564	435	-0.0552036	-0.0260845
C1orf194|127003	chromosome 1 open reading frame 194	DOWN	464.563	0	4	14	19	0.000547917	419	401	634	-0.685106	-0.17729
HORMAD1|84072	HORMA domain containing 1	UP	464.741	0	14	7	19	0.000542557	419	401	635	0.277481	0.0985123
C10orf99|387695	chromosome 10 open reading frame 99		465.275	0	7	10	21	0.000516126	419	401	638	-0.0746553	0.00904424
C9orf171|389799	cilia and flagella associated protein 77	DOWN	465.629	0	4	14	19	0.000491177	419	401	640	-0.567521	-0.0897839
C6orf118|168090	chromosome 6 open reading frame 118	DOWN	465.981	0	4	14	19	0.00044569	419	401	642	-0.154082	-0.112495
TYW1|55253	tRNA-yW synthesizing protein 1 homolog	UP	466.388	0	30	4	10	0.00119079	419	564	440	0.108097	0.196635
VKORC1L1|154807	vitamin K epoxide reductase complex subunit 1 like 1		467.507	1	30	4	10	0.00117978	419	564	443	0.0464479	0.127291
KLRB1|3820	killer cell lectin like receptor B1	DOWN	468.615	5	16	7	11	0.00117333	419	564	446	-0.56926	-0.21768
LIPG|9388	lipase G%2C endothelial type	UP	471.526	0	84	2	11	0.00114338	419	564	454	0.159302	0.0389453
CRCP|27297	CGRP receptor component		473.311	0	30	4	10	0.00110534	419	564	459	0.120219	0.129791
CD40LG|959	CD40 ligand	DOWN	474.72	4	16	7	11	0.00109493	419	564	463	-0.794348	-0.195399
NRAS|4893	NRAS proto-oncogene%2C GTPase	UP	476.114	0	10	9	11	0.00107259	419	564	467	0.341528	0.120041
DR1|1810	down-regulator of transcription 1		479.53	0	10	9	11	0.00102192	419	564	477	0.0678031	0.0987341
LIME1|54923	Lck interacting transmembrane adaptor 1	UP	481.535	0	15	7	11	0.000968846	419	564	483	0.228925	-0.103666
HIAT1|64645	major facilitator superfamily domain containing 14A		482.525	0	10	9	11	0.000954622	419	564	486	0.0184641	0.0341208
PBX4|80714	PBX homeobox 4	UP	486.404	0	15	7	11	0.000930509	419	564	498	0.467916	0.0940708
CCR2|729230	C-C motif chemokine receptor 2	DOWN	493.497	0	16	7	11	0.000848379	419	564	521	-0.63367	-0.186952
NRM|11270	nurim	UP	496.448	0	79	2	13	0.000828478	419	564	531	0.33838	0.19556
TPRKB|51002	TP53 regulating kinase	UP	497.03	0	19	6	12	0.000828103	419	564	533	0.202731	0.165894
ZNHIT6|54680	zinc finger HIT-type containing 6		497.896	0	10	9	11	0.000824346	419	564	536	0.077656	0.104775
GNAI3|2773	G protein subunit alpha i3	UP	498.183	0	10	9	11	0.00081006	419	564	537	0.0876729	0.175711
INSL3|3640	insulin like 3		499.04	0	15	7	11	0.00080347	419	564	540	0.0956719	0.00450196
CTTNBP2NL|55917	CTTNBP2 N-terminal like		501.016	0	10	9	11	0.000793579	419	564	547	-0.0471363	-0.0198086
METTL5|29081	methyltransferase like 5		502.405	0	19	6	12	0.000782302	419	564	552	0.132721	0.126767
CD48|962	CD48 molecule	DOWN	505.401	0	16	7	11	0.000755137	419	564	563	-0.58481	-0.157784
RBMXL1|494115	RBMX like 1		506.47	0	10	9	11	0.000736149	419	564	567	-0.0669227	0.010966
SNRPG|6637	small nuclear ribonucleoprotein polypeptide G	UP	509.615	0	19	6	12	0.000715233	419	564	579	0.233114	0.174797
GMIP|51291	GEM interacting protein		510.387	0	15	7	11	0.000709703	419	564	582	-0.0518243	-0.117521
DEK|7913	DEK proto-oncogene	UP	513.667	0	85	2	10	0.000686699	419	564	595	0.155867	0.120774
MITD1|129531	microtubule interacting and trafficking domain containing 1		513.915	0	19	6	12	0.000686434	419	564	596	0.0786458	0.0659437
SLAMF7|57823	SLAM family member 7	DOWN	514.41	0	16	7	11	0.000682215	419	564	598	-0.405574	-0.11263
LY9|4063	lymphocyte antigen 9	DOWN	517.328	0	16	7	11	0.000638902	419	564	610	-0.645697	-0.170745
C10orf125|282969	fucose mutarotase	UP	517.806	0	15	7	11	0.000632808	419	564	612	0.247152	0.0371042
SNRPA1|6627	small nuclear ribonucleoprotein polypeptide A'	UP	518.52	0	19	6	12	0.000622942	419	564	615	0.153813	0.107321

## Sheet: 1B
ecDNA_status	Tumor	Sample_barcode	SampleType	full_barcode	Center	platform
ecDNA(+)	GBM	TCGA-02-2483-01	Primary Solid Tumor	TCGA-02-2483-01A-01R-1849-01	UNC	HiSeq		Tumor	ecDNA(+)	ecDNA(-)	Total
ecDNA(+)	GBM	TCGA-02-2485-01	Primary Solid Tumor	TCGA-02-2485-01A-01R-1849-01	UNC	HiSeq		OV	3	12	15
ecDNA(+)	LUAD	TCGA-05-4396-01	Primary Solid Tumor	TCGA-05-4396-01A-21R-1858-07	UNC	HiSeq		SKCM	4	12	16
ecDNA(+)	LUAD	TCGA-05-5715-01	Primary Solid Tumor	TCGA-05-5715-01A-01R-1628-07	UNC	HiSeq		LUSC	10	19	29
ecDNA(+)	GBM	TCGA-06-0125-01	Primary Solid Tumor	TCGA-06-0125-01A-01R-1849-01	UNC	HiSeq		LGG	12	70	82
ecDNA(+)	GBM	TCGA-06-0157-01	Primary Solid Tumor	TCGA-06-0157-01A-01R-1849-01	UNC	HiSeq		SARC	15	15	30
ecDNA(+)	GBM	TCGA-06-0210-01	Primary Solid Tumor	TCGA-06-0210-01A-01R-1849-01	UNC	HiSeq		CESC	15	38	53
ecDNA(+)	GBM	TCGA-06-0211-01	Primary Solid Tumor	TCGA-06-0211-01A-01R-1849-01	UNC	HiSeq		LUAD	16	93	109
ecDNA(+)	GBM	TCGA-06-0686-01	Primary Solid Tumor	TCGA-06-0686-01A-01R-1849-01	UNC	HiSeq		UCEC	16	111	127
ecDNA(+)	GBM	TCGA-06-0744-01	Primary Solid Tumor	TCGA-06-0744-01A-01R-1849-01	UNC	HiSeq		ESCA	18	23	41
ecDNA(+)	GBM	TCGA-06-0745-01	Primary Solid Tumor	TCGA-06-0745-01A-01R-1849-01	UNC	HiSeq		GBM	19	4	23
ecDNA(+)	GBM	TCGA-06-2570-01	Primary Solid Tumor	TCGA-06-2570-01A-01R-1849-01	UNC	HiSeq		BRCA	21	47	68
ecDNA(+)	GBM	TCGA-06-5415-01	Primary Solid Tumor	TCGA-06-5415-01A-01R-1849-01	UNC	HiSeq		STAD	25	68	93
ecDNA(+)	GBM	TCGA-14-2554-01	Primary Solid Tumor	TCGA-14-2554-01A-01R-1850-01	UNC	HiSeq		HNSC	28	80	108
ecDNA(+)	GBM	TCGA-19-2620-01	Primary Solid Tumor	TCGA-19-2620-01A-01R-1850-01	UNC	HiSeq		BLCA	32	44	76
ecDNA(+)	GBM	TCGA-19-2624-01	Primary Solid Tumor	TCGA-19-2624-01A-01R-1850-01	UNC	HiSeq			234	636	870
ecDNA(+)	GBM	TCGA-19-5960-01	Primary Solid Tumor	TCGA-19-5960-01A-11R-1850-01	UNC	HiSeq
ecDNA(+)	LUSC	TCGA-22-5477-01	Primary Solid Tumor	TCGA-22-5477-01A-01R-1635-07	UNC	HiSeq
ecDNA(+)	OV	TCGA-24-1419-01	Primary Solid Tumor	TCGA-24-1419-01A-01R-1565-13	BCGSC	HiSeq
ecDNA(+)	GBM	TCGA-26-5132-01	Primary Solid Tumor	TCGA-26-5132-01A-01R-1850-01	UNC	HiSeq
ecDNA(+)	GBM	TCGA-26-5135-01	Primary Solid Tumor	TCGA-26-5135-01A-01R-1850-01	UNC	HiSeq
ecDNA(+)	GBM	TCGA-27-2523-01	Primary Solid Tumor	TCGA-27-2523-01A-01R-1850-01	UNC	HiSeq
ecDNA(+)	LUSC	TCGA-33-4586-01	Primary Solid Tumor	TCGA-33-4586-01A-01R-1443-07	UNC	HiSeq
ecDNA(+)	OV	TCGA-36-1571-01	Primary Solid Tumor	TCGA-36-1571-01A-01R-1566-13	BCGSC	HiSeq
ecDNA(+)	LUSC	TCGA-37-4135-01	Primary Solid Tumor	TCGA-37-4135-01A-01R-1100-07	UNC	HiSeq
ecDNA(+)	LUAD	TCGA-38-4631-01	Primary Solid Tumor	TCGA-38-4631-01A-01R-1755-07	UNC	HiSeq
ecDNA(+)	GBM	TCGA-41-5651-01	Primary Solid Tumor	TCGA-41-5651-01A-01R-1850-01	UNC	HiSeq
ecDNA(+)	LUAD	TCGA-44-4112-01	Primary Solid Tumor	TCGA-44-4112-01A-01R-1107-07	UNC	HiSeq
ecDNA(+)	LUAD	TCGA-44-6774-01	Primary Solid Tumor	TCGA-44-6774-01A-21R-1858-07	UNC	HiSeq
ecDNA(+)	LUAD	TCGA-49-4510-01	Primary Solid Tumor	TCGA-49-4510-01A-01R-1206-07	UNC	HiSeq
ecDNA(+)	LUAD	TCGA-49-6767-01	Primary Solid Tumor	TCGA-49-6767-01A-11R-1858-07	UNC	HiSeq
ecDNA(+)	LUAD	TCGA-50-5933-01	Primary Solid Tumor	TCGA-50-5933-01A-11R-1755-07	UNC	HiSeq
ecDNA(+)	LUAD	TCGA-50-5944-01	Primary Solid Tumor	TCGA-50-5944-01A-11R-1755-07	UNC	HiSeq
ecDNA(+)	LUAD	TCGA-50-6597-01	Primary Solid Tumor	TCGA-50-6597-01A-11R-1858-07	UNC	HiSeq
ecDNA(+)	LUSC	TCGA-60-2724-01	Primary Solid Tumor	TCGA-60-2724-01A-01R-0851-07	UNC	HiSeq
ecDNA(+)	LUSC	TCGA-60-2726-01	Primary Solid Tumor	TCGA-60-2726-01A-01R-0851-07	UNC	HiSeq
ecDNA(+)	OV	TCGA-61-2000-01	Primary Solid Tumor	TCGA-61-2000-01A-01R-1568-13	BCGSC	HiSeq
ecDNA(+)	LUSC	TCGA-66-2756-01	Primary Solid Tumor	TCGA-66-2756-01A-01R-0851-07	UNC	HiSeq
ecDNA(+)	LUSC	TCGA-66-2759-01	Primary Solid Tumor	TCGA-66-2759-01A-01R-0851-07	UNC	HiSeq
ecDNA(+)	LUSC	TCGA-66-2766-01	Primary Solid Tumor	TCGA-66-2766-01A-01R-0851-07	UNC	HiSeq
ecDNA(+)	LUAD	TCGA-71-6725-01	Primary Solid Tumor	TCGA-71-6725-01A-11R-1858-07	UNC	HiSeq
ecDNA(+)	LUAD	TCGA-73-4668-01	Primary Solid Tumor	TCGA-73-4668-01A-01R-1206-07	UNC	HiSeq
ecDNA(+)	LUSC	TCGA-85-8277-01	Primary Solid Tumor	TCGA-85-8277-01A-11R-2296-07	UNC	HiSeq
ecDNA(+)	LUAD	TCGA-91-6831-01	Primary Solid Tumor	TCGA-91-6831-01A-11R-1858-07	UNC	HiSeq
ecDNA(+)	LUAD	TCGA-91-6836-01	Primary Solid Tumor	TCGA-91-6836-01A-21R-1858-07	UNC	HiSeq
ecDNA(+)	LUAD	TCGA-91-6840-01	Primary Solid Tumor	TCGA-91-6840-01A-11R-1949-07	UNC	HiSeq
ecDNA(+)	LUAD	TCGA-91-6847-01	Primary Solid Tumor	TCGA-91-6847-01A-11R-1949-07	UNC	HiSeq
ecDNA(+)	LUSC	TCGA-98-8022-01	Primary Solid Tumor	TCGA-98-8022-01A-11R-2247-07	UNC	HiSeq
ecDNA(+)	BRCA	TCGA-A2-A04P-01	Primary Solid Tumor	TCGA-A2-A04P-01A-31R-A034-07	UNC	HiSeq
ecDNA(+)	BRCA	TCGA-A2-A04X-01	Primary Solid Tumor	TCGA-A2-A04X-01A-21R-A034-07	UNC	HiSeq
ecDNA(+)	BRCA	TCGA-A2-A0D1-01	Primary Solid Tumor	TCGA-A2-A0D1-01A-11R-A034-07	UNC	HiSeq
ecDNA(+)	BRCA	TCGA-A2-A3XX-01	Primary Solid Tumor	TCGA-A2-A3XX-01A-21R-A239-07	UNC	HiSeq
ecDNA(+)	UCEC	TCGA-A5-A0G5-01	Primary Solid Tumor	TCGA-A5-A0G5-01A-11R-A040-07	UNC	GA
ecDNA(+)	UCEC	TCGA-A5-A0GE-01	Primary Solid Tumor	TCGA-A5-A0GE-01A-11R-A16W-07	UNC	GA
ecDNA(+)	BRCA	TCGA-A7-A0D9-01	Primary Solid Tumor	TCGA-A7-A0D9-01A-31R-A056-07	UNC	HiSeq
ecDNA(+)	BRCA	TCGA-A7-A13D-01	Primary Solid Tumor	TCGA-A7-A13D-01A-13R-A12P-07	UNC	HiSeq
ecDNA(+)	BRCA	TCGA-A8-A07I-01	Primary Solid Tumor	TCGA-A8-A07I-01A-11R-A00Z-07	UNC	HiSeq
ecDNA(+)	BRCA	TCGA-A8-A09I-01	Primary Solid Tumor	TCGA-A8-A09I-01A-22R-A034-07	UNC	HiSeq
ecDNA(+)	BRCA	TCGA-AC-A2BK-01	Primary Solid Tumor	TCGA-AC-A2BK-01A-11R-A21T-07	UNC	HiSeq
ecDNA(+)	BRCA	TCGA-AN-A0XR-01	Primary Solid Tumor	TCGA-AN-A0XR-01A-11R-A109-07	UNC	HiSeq
ecDNA(+)	BRCA	TCGA-AO-A0JL-01	Primary Solid Tumor	TCGA-AO-A0JL-01A-11R-A056-07	UNC	HiSeq
ecDNA(+)	BRCA	TCGA-AO-A124-01	Primary Solid Tumor	TCGA-AO-A124-01A-11R-A10J-07	UNC	HiSeq
ecDNA(+)	UCEC	TCGA-AP-A05A-01	Primary Solid Tumor	TCGA-AP-A05A-01A-11R-A00V-07	UNC	GA
ecDNA(+)	UCEC	TCGA-AP-A0LH-01	Primary Solid Tumor	TCGA-AP-A0LH-01A-11R-A16W-07	UNC	GA
ecDNA(+)	UCEC	TCGA-AX-A0IU-01	Primary Solid Tumor	TCGA-AX-A0IU-01A-11R-A16W-07	UNC	GA
ecDNA(+)	UCEC	TCGA-AX-A0IW-01	Primary Solid Tumor	TCGA-AX-A0IW-01A-11R-A040-07	UNC	GA
ecDNA(+)	UCEC	TCGA-AX-A2H5-01	Primary Solid Tumor	TCGA-AX-A2H5-01A-11R-A17B-07	UNC	GA
ecDNA(+)	UCEC	TCGA-B5-A1MY-01	Primary Solid Tumor	TCGA-B5-A1MY-01A-11R-A144-07	UNC	GA
ecDNA(+)	BRCA	TCGA-B6-A0I1-01	Primary Solid Tumor	TCGA-B6-A0I1-01A-11R-A21T-07	UNC	HiSeq
ecDNA(+)	STAD	TCGA-B7-5818-01	Primary Solid Tumor	TCGA-B7-5818-01A-11R-1602-13	BCGSC	HiSeq
ecDNA(+)	HNSC	TCGA-BA-4076-01	Primary Solid Tumor	TCGA-BA-4076-01A-01R-1436-07	UNC	HiSeq
ecDNA(+)	HNSC	TCGA-BA-6872-01	Primary Solid Tumor	TCGA-BA-6872-01A-11R-1873-07	UNC	HiSeq
ecDNA(+)	HNSC	TCGA-BB-4224-01	Primary Solid Tumor	TCGA-BB-4224-01A-01R-1436-07	UNC	HiSeq
ecDNA(+)	BRCA	TCGA-BH-A0HB-01	Primary Solid Tumor	TCGA-BH-A0HB-01A-11R-A056-07	UNC	HiSeq
ecDNA(+)	BRCA	TCGA-BH-A18U-01	Primary Solid Tumor	TCGA-BH-A18U-01A-21R-A12D-07	UNC	HiSeq
ecDNA(+)	BLCA	TCGA-BL-A0C8-01	Primary Solid Tumor	TCGA-BL-A0C8-01A-11R-A10U-07	UNC	HiSeq
ecDNA(+)	BLCA	TCGA-BL-A13J-01	Primary Solid Tumor	TCGA-BL-A13J-01A-11R-A10U-07	UNC	HiSeq
ecDNA(+)	STAD	TCGA-BR-4255-01	Primary Solid Tumor	TCGA-BR-4255-01A-01R-1131-13	BCGSC	GA
ecDNA(+)	STAD	TCGA-BR-4267-01	Primary Solid Tumor	TCGA-BR-4267-01A-01R-1131-13	BCGSC	GA
ecDNA(+)	STAD	TCGA-BR-4357-01	Primary Solid Tumor	TCGA-BR-4357-01A-01R-1157-13	BCGSC	GA
ecDNA(+)	STAD	TCGA-BR-4366-01	Primary Solid Tumor	TCGA-BR-4366-01A-01R-1157-13	BCGSC	GA
ecDNA(+)	STAD	TCGA-BR-4367-01	Primary Solid Tumor	TCGA-BR-4367-01A-01R-1157-13	BCGSC	GA
ecDNA(+)	STAD	TCGA-BR-4369-01	Primary Solid Tumor	TCGA-BR-4369-01A-01R-1157-13	BCGSC	GA
ecDNA(+)	STAD	TCGA-BR-6706-01	Primary Solid Tumor	TCGA-BR-6706-01A-11R-1884-13	BCGSC	HiSeq
ecDNA(+)	UCEC	TCGA-BS-A0TA-01	Primary Solid Tumor	TCGA-BS-A0TA-01A-11R-A104-07	UNC	GA
ecDNA(+)	BLCA	TCGA-BT-A0S7-01	Primary Solid Tumor	TCGA-BT-A0S7-01A-11R-A10U-07	UNC	HiSeq
ecDNA(+)	BLCA	TCGA-BT-A20P-01	Primary Solid Tumor	TCGA-BT-A20P-01A-11R-A14Y-07	UNC	HiSeq
ecDNA(+)	BLCA	TCGA-BT-A2LB-01	Primary Solid Tumor	TCGA-BT-A2LB-01A-11R-A18C-07	UNC	HiSeq
ecDNA(+)	BLCA	TCGA-BT-A2LD-01	Primary Solid Tumor	TCGA-BT-A2LD-01A-12R-A20F-07	UNC	HiSeq
ecDNA(+)	BLCA	TCGA-C4-A0F0-01	Primary Solid Tumor	TCGA-C4-A0F0-01A-12R-A10U-07	UNC	HiSeq
ecDNA(+)	CESC	TCGA-C5-A1BJ-01	Primary Solid Tumor	TCGA-C5-A1BJ-01A-11R-A13Y-07	UNC	HiSeq
ecDNA(+)	CESC	TCGA-C5-A1M9-01	Primary Solid Tumor	TCGA-C5-A1M9-01A-11R-A13Y-07	UNC	HiSeq
ecDNA(+)	CESC	TCGA-C5-A2LX-01	Primary Solid Tumor	TCGA-C5-A2LX-01A-11R-A18M-07	UNC	HiSeq
ecDNA(+)	CESC	TCGA-C5-A2M1-01	Primary Solid Tumor	TCGA-C5-A2M1-01A-11R-A18M-07	UNC	HiSeq
ecDNA(+)	CESC	TCGA-C5-A3HD-01	Primary Solid Tumor	TCGA-C5-A3HD-01B-11R-A213-07	UNC	HiSeq
ecDNA(+)	BRCA	TCGA-C8-A130-01	Primary Solid Tumor	TCGA-C8-A130-01A-31R-A115-07	UNC	HiSeq
ecDNA(+)	STAD	TCGA-CD-5799-01	Primary Solid Tumor	TCGA-CD-5799-01A-11R-1602-13	BCGSC	HiSeq
ecDNA(+)	STAD	TCGA-CD-5800-01	Primary Solid Tumor	TCGA-CD-5800-01A-11R-1602-13	BCGSC	HiSeq
ecDNA(+)	BLCA	TCGA-CF-A1HS-01	Primary Solid Tumor	TCGA-CF-A1HS-01A-11R-A13Y-07	UNC	HiSeq
ecDNA(+)	STAD	TCGA-CG-4301-01	Primary Solid Tumor	TCGA-CG-4301-01A-01R-1157-13	BCGSC	GA
ecDNA(+)	STAD	TCGA-CG-4440-01	Primary Solid Tumor	TCGA-CG-4440-01A-01R-1157-13	BCGSC	GA
ecDNA(+)	STAD	TCGA-CG-4444-01	Primary Solid Tumor	TCGA-CG-4444-01A-01R-1157-13	BCGSC	GA
ecDNA(+)	STAD	TCGA-CG-4449-01	Primary Solid Tumor	TCGA-CG-4449-01A-01R-1157-13	BCGSC	GA
ecDNA(+)	STAD	TCGA-CG-4466-01	Primary Solid Tumor	TCGA-CG-4466-01A-01R-1157-13	BCGSC	GA
ecDNA(+)	STAD	TCGA-CG-4469-01	Primary Solid Tumor	TCGA-CG-4469-01A-01R-1157-13	BCGSC	GA
ecDNA(+)	STAD	TCGA-CG-4475-01	Primary Solid Tumor	TCGA-CG-4475-01A-01R-1157-13	BCGSC	GA
ecDNA(+)	STAD	TCGA-CG-5724-01	Primary Solid Tumor	TCGA-CG-5724-01A-11R-1602-13	BCGSC	HiSeq
ecDNA(+)	STAD	TCGA-CG-5725-01	Primary Solid Tumor	TCGA-CG-5725-01A-11R-1602-13	BCGSC	HiSeq
ecDNA(+)	STAD	TCGA-CG-5734-01	Primary Solid Tumor	TCGA-CG-5734-01A-11R-1602-13	BCGSC	HiSeq
ecDNA(+)	HNSC	TCGA-CN-4725-01	Primary Solid Tumor	TCGA-CN-4725-01A-01R-1436-07	UNC	HiSeq
ecDNA(+)	HNSC	TCGA-CN-4742-01	Primary Solid Tumor	TCGA-CN-4742-01A-02R-1514-07	UNC	HiSeq
ecDNA(+)	HNSC	TCGA-CN-5365-01	Primary Solid Tumor	TCGA-CN-5365-01A-01R-1436-07	UNC	HiSeq
ecDNA(+)	HNSC	TCGA-CN-5367-01	Primary Solid Tumor	TCGA-CN-5367-01A-01R-1436-07	UNC	HiSeq
ecDNA(+)	HNSC	TCGA-CN-5374-01	Primary Solid Tumor	TCGA-CN-5374-01A-01R-1436-07	UNC	HiSeq
ecDNA(+)	HNSC	TCGA-CN-6011-01	Primary Solid Tumor	TCGA-CN-6011-01A-11R-1686-07	UNC	HiSeq
ecDNA(+)	HNSC	TCGA-CN-6994-01	Primary Solid Tumor	TCGA-CN-6994-01A-11R-1915-07	UNC	HiSeq
ecDNA(+)	HNSC	TCGA-CQ-5330-01	Primary Solid Tumor	TCGA-CQ-5330-01A-01R-1686-07	UNC	HiSeq
ecDNA(+)	HNSC	TCGA-CQ-6228-01	Primary Solid Tumor	TCGA-CQ-6228-01A-11R-1915-07	UNC	HiSeq
ecDNA(+)	HNSC	TCGA-CQ-6229-01	Primary Solid Tumor	TCGA-CQ-6229-01A-11R-1915-07	UNC	HiSeq
ecDNA(+)	HNSC	TCGA-CR-6482-01	Primary Solid Tumor	TCGA-CR-6482-01A-11R-1873-07	UNC	HiSeq
ecDNA(+)	HNSC	TCGA-CR-7369-01	Primary Solid Tumor	TCGA-CR-7369-01A-11R-2132-07	UNC	HiSeq
ecDNA(+)	HNSC	TCGA-CR-7404-01	Primary Solid Tumor	TCGA-CR-7404-01A-11R-2132-07	UNC	HiSeq
ecDNA(+)	LGG	TCGA-CS-4941-01	Primary Solid Tumor	TCGA-CS-4941-01A-01R-1470-07	UNC	HiSeq
ecDNA(+)	LGG	TCGA-CS-5395-01	Primary Solid Tumor	TCGA-CS-5395-01A-01R-1470-07	UNC	HiSeq
ecDNA(+)	HNSC	TCGA-CV-5432-01	Primary Solid Tumor	TCGA-CV-5432-01A-02R-1686-07	UNC	HiSeq
ecDNA(+)	HNSC	TCGA-CV-5443-01	Primary Solid Tumor	TCGA-CV-5443-01A-01R-1514-07	UNC	HiSeq
ecDNA(+)	HNSC	TCGA-CV-5973-01	Primary Solid Tumor	TCGA-CV-5973-01A-11R-1686-07	UNC	HiSeq
ecDNA(+)	HNSC	TCGA-CV-6933-01	Primary Solid Tumor	TCGA-CV-6933-01A-11R-1915-07	UNC	HiSeq
ecDNA(+)	HNSC	TCGA-CV-7090-01	Primary Solid Tumor	TCGA-CV-7090-01A-11R-2016-07	UNC	HiSeq
ecDNA(+)	HNSC	TCGA-CV-7095-01	Primary Solid Tumor	TCGA-CV-7095-01A-21R-2016-07	UNC	HiSeq
ecDNA(+)	HNSC	TCGA-CV-7100-01	Primary Solid Tumor	TCGA-CV-7100-01A-11R-2016-07	UNC	HiSeq
ecDNA(+)	HNSC	TCGA-CV-7414-01	Primary Solid Tumor	TCGA-CV-7414-01A-11R-2081-07	UNC	HiSeq
ecDNA(+)	HNSC	TCGA-CV-7416-01	Primary Solid Tumor	TCGA-CV-7416-01A-11R-2081-07	UNC	HiSeq
ecDNA(+)	HNSC	TCGA-CV-7434-01	Primary Solid Tumor	TCGA-CV-7434-01A-11R-2132-07	UNC	HiSeq
ecDNA(+)	UCEC	TCGA-D1-A17K-01	Primary Solid Tumor	TCGA-D1-A17K-01A-11R-A12I-07	UNC	GA
ecDNA(+)	UCEC	TCGA-D1-A1NU-01	Primary Solid Tumor	TCGA-D1-A1NU-01A-11R-A14D-07	UNC	GA
ecDNA(+)	UCEC	TCGA-D1-A1O0-01	Primary Solid Tumor	TCGA-D1-A1O0-01A-11R-A17B-07	UNC	GA
ecDNA(+)	UCEC	TCGA-D1-A2G6-01	Primary Solid Tumor	TCGA-D1-A2G6-01A-11R-A17B-07	UNC	GA
ecDNA(+)	HNSC	TCGA-D6-6826-01	Primary Solid Tumor	TCGA-D6-6826-01A-11R-1915-07	UNC	HiSeq
ecDNA(+)	STAD	TCGA-D7-6518-01	Primary Solid Tumor	TCGA-D7-6518-01A-11R-1802-13	BCGSC	HiSeq
ecDNA(+)	STAD	TCGA-D7-6519-01	Primary Solid Tumor	TCGA-D7-6519-01A-11R-1802-13	BCGSC	HiSeq
ecDNA(+)	STAD	TCGA-D7-6526-01	Primary Solid Tumor	TCGA-D7-6526-01A-11R-1802-13	BCGSC	HiSeq
ecDNA(+)	STAD	TCGA-D7-6527-01	Primary Solid Tumor	TCGA-D7-6527-01A-11R-1802-13	BCGSC	HiSeq
ecDNA(+)	CESC	TCGA-DG-A2KJ-01	Primary Solid Tumor	TCGA-DG-A2KJ-01A-11R-A32Y-07	UNC	HiSeq
ecDNA(+)	BLCA	TCGA-DK-A1A3-01	Primary Solid Tumor	TCGA-DK-A1A3-01A-11R-A13Y-07	UNC	HiSeq
ecDNA(+)	BLCA	TCGA-DK-A1A5-01	Primary Solid Tumor	TCGA-DK-A1A5-01A-11R-A13Y-07	UNC	HiSeq
ecDNA(+)	BLCA	TCGA-DK-A1A6-01	Primary Solid Tumor	TCGA-DK-A1A6-01A-11R-A13Y-07	UNC	HiSeq
ecDNA(+)	BLCA	TCGA-DK-A1AC-01	Primary Solid Tumor	TCGA-DK-A1AC-01A-11R-A13Y-07	UNC	HiSeq
ecDNA(+)	BLCA	TCGA-DK-A1AD-01	Primary Solid Tumor	TCGA-DK-A1AD-01A-11R-A13Y-07	UNC	HiSeq
ecDNA(+)	BLCA	TCGA-DK-A3IT-01	Primary Solid Tumor	TCGA-DK-A3IT-01A-31R-A20F-07	UNC	HiSeq
ecDNA(+)	BLCA	TCGA-DK-A3WX-01	Primary Solid Tumor	TCGA-DK-A3WX-01A-22R-A22U-07	UNC	HiSeq
ecDNA(+)	HNSC	TCGA-DQ-5625-01	Primary Solid Tumor	TCGA-DQ-5625-01A-01R-1873-07	UNC	HiSeq
ecDNA(+)	LGG	TCGA-DU-5852-01	Primary Solid Tumor	TCGA-DU-5852-01A-11R-1708-07	UNC	HiSeq
ecDNA(+)	LGG	TCGA-DU-5854-01	Primary Solid Tumor	TCGA-DU-5854-01A-11R-1708-07	UNC	HiSeq
ecDNA(+)	LGG	TCGA-DU-6403-01	Primary Solid Tumor	TCGA-DU-6403-01A-11R-1708-07	UNC	HiSeq
ecDNA(+)	LGG	TCGA-DU-6405-01	Primary Solid Tumor	TCGA-DU-6405-01A-11R-1708-07	UNC	HiSeq
ecDNA(+)	LGG	TCGA-DU-7010-01	Primary Solid Tumor	TCGA-DU-7010-01A-11R-2027-07	UNC	HiSeq
ecDNA(+)	LGG	TCGA-DU-7292-01	Primary Solid Tumor	TCGA-DU-7292-01A-11R-2027-07	UNC	HiSeq
ecDNA(+)	SARC	TCGA-DX-A1KW-01	Primary Solid Tumor	TCGA-DX-A1KW-01A-22R-A24X-07	UNC	HiSeq
ecDNA(+)	SARC	TCGA-DX-A1L0-01	Primary Solid Tumor	TCGA-DX-A1L0-01A-11R-A24X-07	UNC	HiSeq
ecDNA(+)	SARC	TCGA-DX-A1L2-01	Primary Solid Tumor	TCGA-DX-A1L2-01A-22R-A24X-07	UNC	HiSeq
ecDNA(+)	SARC	TCGA-DX-A1L3-01	Primary Solid Tumor	TCGA-DX-A1L3-01A-11R-A24X-07	UNC	HiSeq
ecDNA(+)	SARC	TCGA-DX-A23R-01	Primary Solid Tumor	TCGA-DX-A23R-01A-11R-A26T-07	UNC	HiSeq
ecDNA(+)	SARC	TCGA-DX-A240-01	Primary Solid Tumor	TCGA-DX-A240-01A-32R-A27Q-07	UNC	HiSeq
ecDNA(+)	SARC	TCGA-DX-A2J4-01	Primary Solid Tumor	TCGA-DX-A2J4-01A-32R-A21T-07	UNC	HiSeq
ecDNA(+)	SARC	TCGA-DX-A3LS-01	Primary Solid Tumor	TCGA-DX-A3LS-01A-11R-A21T-07	UNC	HiSeq
ecDNA(+)	SARC	TCGA-DX-A3LU-01	Primary Solid Tumor	TCGA-DX-A3LU-01A-11R-A21T-07	UNC	HiSeq
ecDNA(+)	SARC	TCGA-DX-A3LW-01	Primary Solid Tumor	TCGA-DX-A3LW-01A-21R-A21T-07	UNC	HiSeq
ecDNA(+)	SARC	TCGA-DX-A3LY-01	Primary Solid Tumor	TCGA-DX-A3LY-01B-11R-A27Q-07	UNC	HiSeq
ecDNA(+)	SARC	TCGA-DX-A3M1-01	Primary Solid Tumor	TCGA-DX-A3M1-01A-11R-A22K-07	UNC	HiSeq
ecDNA(+)	SARC	TCGA-DX-A3U5-01	Primary Solid Tumor	TCGA-DX-A3U5-01A-11R-A22K-07	UNC	HiSeq
ecDNA(+)	BRCA	TCGA-E2-A109-01	Primary Solid Tumor	TCGA-E2-A109-01A-11R-A10J-07	UNC	HiSeq
ecDNA(+)	BRCA	TCGA-E2-A1LG-01	Primary Solid Tumor	TCGA-E2-A1LG-01A-21R-A14M-07	UNC	HiSeq
ecDNA(+)	BRCA	TCGA-E2-A1LL-01	Primary Solid Tumor	TCGA-E2-A1LL-01A-11R-A144-07	UNC	HiSeq
ecDNA(+)	BLCA	TCGA-E7-A3X6-01	Primary Solid Tumor	TCGA-E7-A3X6-01A-12R-A22U-07	UNC	HiSeq
ecDNA(+)	CESC	TCGA-EA-A3QD-01	Primary Solid Tumor	TCGA-EA-A3QD-01A-32R-A22U-07	UNC	HiSeq
ecDNA(+)	SKCM	TCGA-EB-A24C-01	Primary Solid Tumor	TCGA-EB-A24C-01A-11R-A18T-07	UNC	HiSeq
ecDNA(+)	CESC	TCGA-EK-A2PM-01	Primary Solid Tumor	TCGA-EK-A2PM-01A-11R-A18M-07	UNC	HiSeq
ecDNA(+)	CESC	TCGA-EK-A2R9-01	Primary Solid Tumor	TCGA-EK-A2R9-01A-11R-A18M-07	UNC	HiSeq
ecDNA(+)	CESC	TCGA-EK-A2RM-01	Primary Solid Tumor	TCGA-EK-A2RM-01A-21R-A18M-07	UNC	HiSeq
ecDNA(+)	CESC	TCGA-EK-A3GJ-01	Primary Solid Tumor	TCGA-EK-A3GJ-01A-21R-A213-07	UNC	HiSeq
ecDNA(+)	UCEC	TCGA-EO-A1Y8-01	Primary Solid Tumor	TCGA-EO-A1Y8-01A-11R-A157-07	UNC	GA
ecDNA(+)	SKCM	TCGA-ER-A196-01	Primary Solid Tumor	TCGA-ER-A196-01A-11R-A18T-07	UNC	HiSeq
ecDNA(+)	SKCM	TCGA-ER-A19T-01	Primary Solid Tumor	TCGA-ER-A19T-01A-11R-A18T-07	UNC	HiSeq
ecDNA(+)	BRCA	TCGA-EW-A1PC-01	Primary Solid Tumor	TCGA-EW-A1PC-01B-11R-A21T-07	UNC	HiSeq
ecDNA(+)	BRCA	TCGA-EW-A3U0-01	Primary Solid Tumor	TCGA-EW-A3U0-01A-11R-A22K-07	UNC	HiSeq
ecDNA(+)	CESC	TCGA-EX-A3L1-01	Primary Solid Tumor	TCGA-EX-A3L1-01A-11R-A32Y-07	UNC	HiSeq
ecDNA(+)	UCEC	TCGA-EY-A1GC-01	Primary Solid Tumor	TCGA-EY-A1GC-01A-11R-A13S-07	UNC	GA
ecDNA(+)	BLCA	TCGA-FD-A3B6-01	Primary Solid Tumor	TCGA-FD-A3B6-01A-21R-A20F-07	UNC	HiSeq
ecDNA(+)	BLCA	TCGA-FD-A3N5-01	Primary Solid Tumor	TCGA-FD-A3N5-01A-11R-A21D-07	UNC	HiSeq
ecDNA(+)	BLCA	TCGA-FD-A3N6-01	Primary Solid Tumor	TCGA-FD-A3N6-01A-11R-A21D-07	UNC	HiSeq
ecDNA(+)	BLCA	TCGA-FD-A3SL-01	Primary Solid Tumor	TCGA-FD-A3SL-01A-21R-A22U-07	UNC	HiSeq
ecDNA(+)	BLCA	TCGA-FD-A3SM-01	Primary Solid Tumor	TCGA-FD-A3SM-01A-11R-A22U-07	UNC	HiSeq
ecDNA(+)	BLCA	TCGA-FD-A3SO-01	Primary Solid Tumor	TCGA-FD-A3SO-01A-11R-A22U-07	UNC	HiSeq
ecDNA(+)	LGG	TCGA-FG-6688-01	Primary Solid Tumor	TCGA-FG-6688-01A-11R-1896-07	UNC	HiSeq
ecDNA(+)	LGG	TCGA-FG-6692-01	Primary Solid Tumor	TCGA-FG-6692-01A-11R-1896-07	UNC	HiSeq
ecDNA(+)	UCEC	TCGA-FI-A2CY-01	Primary Solid Tumor	TCGA-FI-A2CY-01A-11R-A17B-07	UNC	GA
ecDNA(+)	BLCA	TCGA-FT-A3EE-01	Primary Solid Tumor	TCGA-FT-A3EE-01A-11R-A206-07	UNC	HiSeq
ecDNA(+)	BLCA	TCGA-G2-A2EK-01	Primary Solid Tumor	TCGA-G2-A2EK-01A-22R-A18C-07	UNC	HiSeq
ecDNA(+)	BLCA	TCGA-GC-A3RD-01	Primary Solid Tumor	TCGA-GC-A3RD-01A-12R-A22U-07	UNC	HiSeq
ecDNA(+)	SKCM	TCGA-GF-A2C7-01	Primary Solid Tumor	TCGA-GF-A2C7-01A-11R-A18T-07	UNC	HiSeq
ecDNA(+)	BLCA	TCGA-GV-A3JV-01	Primary Solid Tumor	TCGA-GV-A3JV-01A-11R-A220-07	UNC	HiSeq
ecDNA(+)	BLCA	TCGA-GV-A3JW-01	Primary Solid Tumor	TCGA-GV-A3JW-01A-11R-A20F-07	UNC	HiSeq
ecDNA(+)	BLCA	TCGA-GV-A3JZ-01	Primary Solid Tumor	TCGA-GV-A3JZ-01A-11R-A21D-07	UNC	HiSeq
ecDNA(+)	BLCA	TCGA-GV-A3QF-01	Primary Solid Tumor	TCGA-GV-A3QF-01A-31R-A22U-07	UNC	HiSeq
ecDNA(+)	BLCA	TCGA-GV-A3QH-01	Primary Solid Tumor	TCGA-GV-A3QH-01A-11R-A220-07	UNC	HiSeq
ecDNA(+)	BLCA	TCGA-H4-A2HQ-01	Primary Solid Tumor	TCGA-H4-A2HQ-01A-11R-A180-07	UNC	HiSeq
ecDNA(+)	LGG	TCGA-HT-A61B-01	Primary Solid Tumor	TCGA-HT-A61B-01A-11R-A29R-07	UNC	HiSeq
ecDNA(+)	STAD	TCGA-HU-A4G6-01	Primary Solid Tumor	TCGA-HU-A4G6-01A-11R-A24K-31	BCGSC	HiSeq
ecDNA(+)	ESCA	TCGA-IG-A3I8-01	Primary Solid Tumor	TCGA-IG-A3I8-01A-11R-A24K-31	BCGSC	HiSeq
ecDNA(+)	ESCA	TCGA-IG-A50L-01	Primary Solid Tumor	TCGA-IG-A50L-01A-11R-A260-31	BCGSC	HiSeq
ecDNA(+)	ESCA	TCGA-IG-A97I-01	Primary Solid Tumor	TCGA-IG-A97I-01A-11R-A38D-31	BCGSC	HiSeq
ecDNA(+)	LGG	TCGA-IK-7675-01	Primary Solid Tumor	TCGA-IK-7675-01A-11R-2090-07	UNC	HiSeq
ecDNA(+)	CESC	TCGA-IR-A3LA-01	Primary Solid Tumor	TCGA-IR-A3LA-01A-11R-A22U-07	UNC	HiSeq
ecDNA(+)	CESC	TCGA-IR-A3LH-01	Primary Solid Tumor	TCGA-IR-A3LH-01A-21R-A213-07	UNC	HiSeq
ecDNA(+)	CESC	TCGA-IR-A3LK-01	Primary Solid Tumor	TCGA-IR-A3LK-01A-12R-A213-07	UNC	HiSeq
ecDNA(+)	SARC	TCGA-IS-A3KA-01	Primary Solid Tumor	TCGA-IS-A3KA-01A-11R-A21T-07	UNC	HiSeq
ecDNA(+)	BLCA	TCGA-K4-A3WV-01	Primary Solid Tumor	TCGA-K4-A3WV-01A-11R-A22U-07	UNC	HiSeq
ecDNA(+)	ESCA	TCGA-L5-A43M-01	Primary Solid Tumor	TCGA-L5-A43M-01A-11R-A24K-31	BCGSC	HiSeq
ecDNA(+)	ESCA	TCGA-L5-A4OH-01	Primary Solid Tumor	TCGA-L5-A4OH-01A-11R-A260-31	BCGSC	HiSeq
ecDNA(+)	ESCA	TCGA-L5-A4OJ-01	Primary Solid Tumor	TCGA-L5-A4OJ-01A-11R-A260-31	BCGSC	HiSeq
ecDNA(+)	ESCA	TCGA-L5-A4ON-01	Primary Solid Tumor	TCGA-L5-A4ON-01A-11R-A260-31	BCGSC	HiSeq
ecDNA(+)	ESCA	TCGA-L5-A4OT-01	Primary Solid Tumor	TCGA-L5-A4OT-01A-11R-A28J-31	BCGSC	HiSeq
ecDNA(+)	ESCA	TCGA-L5-A8NE-01	Primary Solid Tumor	TCGA-L5-A8NE-01A-11R-A37I-31	BCGSC	HiSeq
ecDNA(+)	ESCA	TCGA-L7-A56G-01	Primary Solid Tumor	TCGA-L7-A56G-01A-21R-A260-31	BCGSC	HiSeq
ecDNA(+)	ESCA	TCGA-L7-A6VZ-01	Primary Solid Tumor	TCGA-L7-A6VZ-01A-12R-A336-31	BCGSC	HiSeq
ecDNA(+)	ESCA	TCGA-LN-A49R-01	Primary Solid Tumor	TCGA-LN-A49R-01A-11R-A24K-31	BCGSC	HiSeq
ecDNA(+)	ESCA	TCGA-LN-A49V-01	Primary Solid Tumor	TCGA-LN-A49V-01A-11R-A24K-31	BCGSC	HiSeq
ecDNA(+)	ESCA	TCGA-LN-A49W-01	Primary Solid Tumor	TCGA-LN-A49W-01A-11R-A260-31	BCGSC	HiSeq
ecDNA(+)	ESCA	TCGA-LN-A4A8-01	Primary Solid Tumor	TCGA-LN-A4A8-01A-32R-A260-31	BCGSC	HiSeq
ecDNA(+)	ESCA	TCGA-LN-A5U5-01	Primary Solid Tumor	TCGA-LN-A5U5-01A-21R-A28J-31	BCGSC	HiSeq
ecDNA(+)	ESCA	TCGA-LN-A9FQ-01	Primary Solid Tumor	TCGA-LN-A9FQ-01A-31R-A38D-31	BCGSC	HiSeq
ecDNA(+)	ESCA	TCGA-V5-A7RC-01	Primary Solid Tumor	TCGA-V5-A7RC-01B-11R-A406-31	BCGSC	HiSeq
ecDNA(+)	SARC	TCGA-X2-A95T-01	Primary Solid Tumor	TCGA-X2-A95T-01A-11R-A37L-07	UNC	HiSeq
ecDNA(-)	OV	TCGA-04-1514-01	Primary Solid Tumor	TCGA-04-1514-01A-01R-1566-13	BCGSC	HiSeq
ecDNA(-)	LUAD	TCGA-05-4249-01	Primary Solid Tumor	TCGA-05-4249-01A-01R-1107-07	UNC	HiSeq
ecDNA(-)	LUAD	TCGA-05-4384-01	Primary Solid Tumor	TCGA-05-4384-01A-01R-1755-07	UNC	HiSeq
ecDNA(-)	LUAD	TCGA-05-4389-01	Primary Solid Tumor	TCGA-05-4389-01A-01R-1206-07	UNC	HiSeq
ecDNA(-)	LUAD	TCGA-05-4390-01	Primary Solid Tumor	TCGA-05-4390-01A-02R-1755-07	UNC	HiSeq
ecDNA(-)	LUAD	TCGA-05-4395-01	Primary Solid Tumor	TCGA-05-4395-01A-01R-1206-07	UNC	HiSeq
ecDNA(-)	LUAD	TCGA-05-4398-01	Primary Solid Tumor	TCGA-05-4398-01A-01R-1206-07	UNC	HiSeq
ecDNA(-)	LUAD	TCGA-05-4402-01	Primary Solid Tumor	TCGA-05-4402-01A-01R-1206-07	UNC	HiSeq
ecDNA(-)	LUAD	TCGA-05-4403-01	Primary Solid Tumor	TCGA-05-4403-01A-01R-1206-07	UNC	HiSeq
ecDNA(-)	LUAD	TCGA-05-4410-01	Primary Solid Tumor	TCGA-05-4410-01A-21R-1858-07	UNC	HiSeq
ecDNA(-)	LUAD	TCGA-05-4417-01	Primary Solid Tumor	TCGA-05-4417-01A-22R-1858-07	UNC	HiSeq
ecDNA(-)	LUAD	TCGA-05-4418-01	Primary Solid Tumor	TCGA-05-4418-01A-01R-1206-07	UNC	HiSeq
ecDNA(-)	LUAD	TCGA-05-4424-01	Primary Solid Tumor	TCGA-05-4424-01A-22R-1858-07	UNC	HiSeq
ecDNA(-)	LUAD	TCGA-05-4425-01	Primary Solid Tumor	TCGA-05-4425-01A-01R-1755-07	UNC	HiSeq
ecDNA(-)	LUAD	TCGA-05-4426-01	Primary Solid Tumor	TCGA-05-4426-01A-01R-1206-07	UNC	HiSeq
ecDNA(-)	LUAD	TCGA-05-4427-01	Primary Solid Tumor	TCGA-05-4427-01A-21R-1858-07	UNC	HiSeq
ecDNA(-)	LUAD	TCGA-05-4430-01	Primary Solid Tumor	TCGA-05-4430-01A-02R-1206-07	UNC	HiSeq
ecDNA(-)	LUAD	TCGA-05-4433-01	Primary Solid Tumor	TCGA-05-4433-01A-22R-1858-07	UNC	HiSeq
ecDNA(-)	LUAD	TCGA-05-4434-01	Primary Solid Tumor	TCGA-05-4434-01A-01R-1206-07	UNC	HiSeq
ecDNA(-)	LUAD	TCGA-05-5429-01	Primary Solid Tumor	TCGA-05-5429-01A-01R-1628-07	UNC	HiSeq
ecDNA(-)	GBM	TCGA-06-0190-01	Primary Solid Tumor	TCGA-06-0190-01A-01R-1849-01	UNC	HiSeq
ecDNA(-)	OV	TCGA-09-1666-01	Primary Solid Tumor	TCGA-09-1666-01A-01R-1566-13	BCGSC	HiSeq
ecDNA(-)	OV	TCGA-09-2045-01	Primary Solid Tumor	TCGA-09-2045-01A-01R-1568-13	BCGSC	HiSeq
ecDNA(-)	OV	TCGA-13-1411-01	Primary Solid Tumor	TCGA-13-1411-01A-01R-1565-13	BCGSC	HiSeq
ecDNA(-)	GBM	TCGA-14-1034-01	Primary Solid Tumor	TCGA-14-1034-01A-01R-1849-01	UNC	HiSeq
ecDNA(-)	GBM	TCGA-15-1444-01	Primary Solid Tumor	TCGA-15-1444-01A-02R-1850-01	UNC	HiSeq
ecDNA(-)	LUSC	TCGA-18-3415-01	Primary Solid Tumor	TCGA-18-3415-01A-01R-0980-07	UNC	HiSeq
ecDNA(-)	LUSC	TCGA-18-4721-01	Primary Solid Tumor	TCGA-18-4721-01A-01R-1443-07	UNC	HiSeq
ecDNA(-)	GBM	TCGA-19-2629-01	Primary Solid Tumor	TCGA-19-2629-01A-01R-1850-01	UNC	HiSeq
ecDNA(-)	LUSC	TCGA-21-1076-01	Primary Solid Tumor	TCGA-21-1076-01A-01R-0692-07	UNC	HiSeq
ecDNA(-)	LUSC	TCGA-21-1082-01	Primary Solid Tumor	TCGA-21-1082-01A-01R-0692-07	UNC	HiSeq
ecDNA(-)	LUSC	TCGA-22-5485-01	Primary Solid Tumor	TCGA-22-5485-01A-01R-1635-07	UNC	HiSeq
ecDNA(-)	LUSC	TCGA-22-5492-01	Primary Solid Tumor	TCGA-22-5492-01A-01R-1635-07	UNC	HiSeq
ecDNA(-)	OV	TCGA-24-1548-01	Primary Solid Tumor	TCGA-24-1548-01A-01R-1566-13	BCGSC	HiSeq
ecDNA(-)	OV	TCGA-24-1557-01	Primary Solid Tumor	TCGA-24-1557-01A-01R-1566-13	BCGSC	HiSeq
ecDNA(-)	OV	TCGA-24-1562-01	Primary Solid Tumor	TCGA-24-1562-01A-01R-1566-13	BCGSC	HiSeq
ecDNA(-)	OV	TCGA-24-2024-01	Primary Solid Tumor	TCGA-24-2024-01A-02R-1568-13	BCGSC	HiSeq
ecDNA(-)	OV	TCGA-24-2290-01	Primary Solid Tumor	TCGA-24-2290-01A-01R-1568-13	BCGSC	HiSeq
ecDNA(-)	OV	TCGA-25-1632-01	Primary Solid Tumor	TCGA-25-1632-01A-01R-1566-13	BCGSC	HiSeq
ecDNA(-)	OV	TCGA-25-2391-01	Primary Solid Tumor	TCGA-25-2391-01A-01R-1569-13	BCGSC	HiSeq
ecDNA(-)	LUSC	TCGA-34-2596-01	Primary Solid Tumor	TCGA-34-2596-01A-01R-0851-07	UNC	HiSeq
ecDNA(-)	LUSC	TCGA-34-5240-01	Primary Solid Tumor	TCGA-34-5240-01A-01R-1443-07	UNC	HiSeq
ecDNA(-)	LUAD	TCGA-35-4122-01	Primary Solid Tumor	TCGA-35-4122-01A-01R-1107-07	UNC	HiSeq
ecDNA(-)	LUAD	TCGA-35-4123-01	Primary Solid Tumor	TCGA-35-4123-01A-01R-1107-07	UNC	HiSeq
ecDNA(-)	OV	TCGA-36-1570-01	Primary Solid Tumor	TCGA-36-1570-01A-01R-1566-13	BCGSC	HiSeq
ecDNA(-)	LUAD	TCGA-38-4628-01	Primary Solid Tumor	TCGA-38-4628-01A-01R-1206-07	UNC	HiSeq
ecDNA(-)	LUAD	TCGA-38-6178-01	Primary Solid Tumor	TCGA-38-6178-01A-11R-1755-07	UNC	HiSeq
ecDNA(-)	LUSC	TCGA-43-3920-01	Primary Solid Tumor	TCGA-43-3920-01A-01R-0980-07	UNC	HiSeq
ecDNA(-)	LUSC	TCGA-43-5670-01	Primary Solid Tumor	TCGA-43-5670-01A-21R-2125-07	UNC	HiSeq
ecDNA(-)	LUAD	TCGA-44-2656-01	Primary Solid Tumor	TCGA-44-2656-01A-02R-0946-07	UNC	HiSeq
ecDNA(-)	LUAD	TCGA-44-2666-01	Primary Solid Tumor	TCGA-44-2666-01A-01R-0946-07	UNC	HiSeq
ecDNA(-)	LUAD	TCGA-44-2668-01	Primary Solid Tumor	TCGA-44-2668-01A-01R-0946-07	UNC	HiSeq
ecDNA(-)	LUAD	TCGA-44-3396-01	Primary Solid Tumor	TCGA-44-3396-01A-01R-1206-07	UNC	HiSeq
ecDNA(-)	LUAD	TCGA-44-3918-01	Primary Solid Tumor	TCGA-44-3918-01A-01R-1107-07	UNC	HiSeq
ecDNA(-)	LUAD	TCGA-44-3919-01	Primary Solid Tumor	TCGA-44-3919-01A-02R-1107-07	UNC	HiSeq
ecDNA(-)	LUAD	TCGA-44-6145-01	Primary Solid Tumor	TCGA-44-6145-01A-11R-1755-07	UNC	HiSeq
ecDNA(-)	LUAD	TCGA-44-6146-01	Primary Solid Tumor	TCGA-44-6146-01A-11R-1755-07	UNC	HiSeq
ecDNA(-)	LUAD	TCGA-44-6148-01	Primary Solid Tumor	TCGA-44-6148-01A-11R-1755-07	UNC	HiSeq
ecDNA(-)	LUAD	TCGA-44-6775-01	Primary Solid Tumor	TCGA-44-6775-01A-11R-1858-07	UNC	HiSeq
ecDNA(-)	LUAD	TCGA-44-6776-01	Primary Solid Tumor	TCGA-44-6776-01A-11R-1858-07	UNC	HiSeq
ecDNA(-)	LUAD	TCGA-44-6777-01	Primary Solid Tumor	TCGA-44-6777-01A-11R-1858-07	UNC	HiSeq
ecDNA(-)	LUAD	TCGA-44-6778-01	Primary Solid Tumor	TCGA-44-6778-01A-11R-1858-07	UNC	HiSeq
ecDNA(-)	LUAD	TCGA-44-6779-01	Primary Solid Tumor	TCGA-44-6779-01A-11R-1858-07	UNC	HiSeq
ecDNA(-)	LUAD	TCGA-49-4486-01	Primary Solid Tumor	TCGA-49-4486-01A-01R-1206-07	UNC	HiSeq
ecDNA(-)	LUAD	TCGA-49-4494-01	Primary Solid Tumor	TCGA-49-4494-01A-01R-1206-07	UNC	HiSeq
ecDNA(-)	LUAD	TCGA-49-4506-01	Primary Solid Tumor	TCGA-49-4506-01A-01R-1206-07	UNC	HiSeq
ecDNA(-)	LUAD	TCGA-49-4512-01	Primary Solid Tumor	TCGA-49-4512-01A-21R-1858-07	UNC	HiSeq
ecDNA(-)	LUAD	TCGA-49-6742-01	Primary Solid Tumor	TCGA-49-6742-01A-11R-1858-07	UNC	HiSeq
ecDNA(-)	LUAD	TCGA-49-6743-01	Primary Solid Tumor	TCGA-49-6743-01A-11R-1858-07	UNC	HiSeq
ecDNA(-)	LUAD	TCGA-49-6744-01	Primary Solid Tumor	TCGA-49-6744-01A-11R-1858-07	UNC	HiSeq
ecDNA(-)	LUAD	TCGA-50-5045-01	Primary Solid Tumor	TCGA-50-5045-01A-01R-1628-07	UNC	HiSeq
ecDNA(-)	LUAD	TCGA-50-5049-01	Primary Solid Tumor	TCGA-50-5049-01A-01R-1628-07	UNC	HiSeq
ecDNA(-)	LUAD	TCGA-50-5051-01	Primary Solid Tumor	TCGA-50-5051-01A-21R-1858-07	UNC	HiSeq
ecDNA(-)	LUAD	TCGA-50-5055-01	Primary Solid Tumor	TCGA-50-5055-01A-01R-1628-07	UNC	HiSeq
ecDNA(-)	LUAD	TCGA-50-5066-01	Primary Solid Tumor	TCGA-50-5066-01A-01R-1628-07	UNC	HiSeq
ecDNA(-)	LUAD	TCGA-50-5930-01	Primary Solid Tumor	TCGA-50-5930-01A-11R-1755-07	UNC	HiSeq
ecDNA(-)	LUAD	TCGA-50-5932-01	Primary Solid Tumor	TCGA-50-5932-01A-11R-1755-07	UNC	HiSeq
ecDNA(-)	LUAD	TCGA-50-5935-01	Primary Solid Tumor	TCGA-50-5935-01A-11R-1755-07	UNC	HiSeq
ecDNA(-)	LUAD	TCGA-50-5941-01	Primary Solid Tumor	TCGA-50-5941-01A-11R-1755-07	UNC	HiSeq
ecDNA(-)	LUAD	TCGA-50-5942-01	Primary Solid Tumor	TCGA-50-5942-01A-21R-1755-07	UNC	HiSeq
ecDNA(-)	LUAD	TCGA-50-5946-01	Primary Solid Tumor	TCGA-50-5946-01A-11R-1755-07	UNC	HiSeq
ecDNA(-)	LUAD	TCGA-50-6592-01	Primary Solid Tumor	TCGA-50-6592-01A-11R-1755-07	UNC	HiSeq
ecDNA(-)	LUAD	TCGA-50-6593-01	Primary Solid Tumor	TCGA-50-6593-01A-11R-1755-07	UNC	HiSeq
ecDNA(-)	LUSC	TCGA-52-7812-01	Primary Solid Tumor	TCGA-52-7812-01A-11R-2125-07	UNC	HiSeq
ecDNA(-)	LUAD	TCGA-55-6543-01	Primary Solid Tumor	TCGA-55-6543-01A-11R-1755-07	UNC	HiSeq
ecDNA(-)	LUAD	TCGA-55-6642-01	Primary Solid Tumor	TCGA-55-6642-01A-11R-1858-07	UNC	HiSeq
ecDNA(-)	LUAD	TCGA-55-6712-01	Primary Solid Tumor	TCGA-55-6712-01A-11R-1858-07	UNC	HiSeq
ecDNA(-)	LUAD	TCGA-55-6972-01	Primary Solid Tumor	TCGA-55-6972-01A-11R-1949-07	UNC	HiSeq
ecDNA(-)	LUAD	TCGA-55-6984-01	Primary Solid Tumor	TCGA-55-6984-01A-11R-1949-07	UNC	HiSeq
ecDNA(-)	LUAD	TCGA-55-6986-01	Primary Solid Tumor	TCGA-55-6986-01A-11R-1949-07	UNC	HiSeq
ecDNA(-)	LUAD	TCGA-55-7281-01	Primary Solid Tumor	TCGA-55-7281-01A-11R-2039-07	UNC	HiSeq
ecDNA(-)	LUAD	TCGA-55-8299-01	Primary Solid Tumor	TCGA-55-8299-01A-11R-2287-07	UNC	HiSeq
ecDNA(-)	LUSC	TCGA-56-7582-01	Primary Solid Tumor	TCGA-56-7582-01A-11R-2045-07	UNC	HiSeq
ecDNA(-)	LUSC	TCGA-60-2695-01	Primary Solid Tumor	TCGA-60-2695-01A-01R-0851-07	UNC	HiSeq
ecDNA(-)	LUSC	TCGA-60-2698-01	Primary Solid Tumor	TCGA-60-2698-01A-01R-0851-07	UNC	HiSeq
ecDNA(-)	LUAD	TCGA-64-1680-01	Primary Solid Tumor	TCGA-64-1680-01A-02R-0946-07	UNC	HiSeq
ecDNA(-)	LUAD	TCGA-64-5775-01	Primary Solid Tumor	TCGA-64-5775-01A-01R-1628-07	UNC	HiSeq
ecDNA(-)	LUAD	TCGA-64-5781-01	Primary Solid Tumor	TCGA-64-5781-01A-01R-1628-07	UNC	HiSeq
ecDNA(-)	LUAD	TCGA-64-5815-01	Primary Solid Tumor	TCGA-64-5815-01A-01R-1628-07	UNC	HiSeq
ecDNA(-)	LUSC	TCGA-66-2757-01	Primary Solid Tumor	TCGA-66-2757-01A-01R-0851-07	UNC	HiSeq
ecDNA(-)	LUSC	TCGA-66-2789-01	Primary Solid Tumor	TCGA-66-2789-01A-01R-0980-07	UNC	HiSeq
ecDNA(-)	LUSC	TCGA-66-2793-01	Primary Solid Tumor	TCGA-66-2793-01A-01R-1201-07	UNC	HiSeq
ecDNA(-)	LUAD	TCGA-67-6215-01	Primary Solid Tumor	TCGA-67-6215-01A-11R-1755-07	UNC	HiSeq
ecDNA(-)	LUAD	TCGA-67-6216-01	Primary Solid Tumor	TCGA-67-6216-01A-11R-1755-07	UNC	HiSeq
ecDNA(-)	LUAD	TCGA-73-4658-01	Primary Solid Tumor	TCGA-73-4658-01A-01R-1755-07	UNC	HiSeq
ecDNA(-)	LUAD	TCGA-73-4659-01	Primary Solid Tumor	TCGA-73-4659-01A-01R-1206-07	UNC	HiSeq
ecDNA(-)	LUAD	TCGA-73-4662-01	Primary Solid Tumor	TCGA-73-4662-01A-01R-1206-07	UNC	HiSeq
ecDNA(-)	LUAD	TCGA-73-4666-01	Primary Solid Tumor	TCGA-73-4666-01A-01R-1206-07	UNC	HiSeq
ecDNA(-)	LUAD	TCGA-73-4670-01	Primary Solid Tumor	TCGA-73-4670-01A-01R-1206-07	UNC	HiSeq
ecDNA(-)	LUAD	TCGA-73-4675-01	Primary Solid Tumor	TCGA-73-4675-01A-01R-1206-07	UNC	HiSeq
ecDNA(-)	LUAD	TCGA-73-4676-01	Primary Solid Tumor	TCGA-73-4676-01A-01R-1755-07	UNC	HiSeq
ecDNA(-)	LUAD	TCGA-73-4677-01	Primary Solid Tumor	TCGA-73-4677-01A-01R-1206-07	UNC	HiSeq
ecDNA(-)	LUAD	TCGA-75-5125-01	Primary Solid Tumor	TCGA-75-5125-01A-01R-1755-07	UNC	HiSeq
ecDNA(-)	LUAD	TCGA-75-5126-01	Primary Solid Tumor	TCGA-75-5126-01A-01R-1755-07	UNC	HiSeq
ecDNA(-)	LUAD	TCGA-75-5147-01	Primary Solid Tumor	TCGA-75-5147-01A-01R-1628-07	UNC	HiSeq
ecDNA(-)	LUAD	TCGA-75-6203-01	Primary Solid Tumor	TCGA-75-6203-01A-11R-1755-07	UNC	HiSeq
ecDNA(-)	LUAD	TCGA-75-6206-01	Primary Solid Tumor	TCGA-75-6206-01A-11R-1755-07	UNC	HiSeq
ecDNA(-)	LUAD	TCGA-75-7030-01	Primary Solid Tumor	TCGA-75-7030-01A-11R-1949-07	UNC	HiSeq
ecDNA(-)	LUAD	TCGA-78-7143-01	Primary Solid Tumor	TCGA-78-7143-01A-11R-2039-07	UNC	HiSeq
ecDNA(-)	LUAD	TCGA-78-7156-01	Primary Solid Tumor	TCGA-78-7156-01A-11R-2039-07	UNC	HiSeq
ecDNA(-)	LUAD	TCGA-78-7158-01	Primary Solid Tumor	TCGA-78-7158-01A-11R-2039-07	UNC	HiSeq
ecDNA(-)	LUAD	TCGA-78-7535-01	Primary Solid Tumor	TCGA-78-7535-01A-11R-2066-07	UNC	HiSeq
ecDNA(-)	LUSC	TCGA-85-8052-01	Primary Solid Tumor	TCGA-85-8052-01A-11R-2247-07	UNC	HiSeq
ecDNA(-)	LUAD	TCGA-86-6562-01	Primary Solid Tumor	TCGA-86-6562-01A-11R-1755-07	UNC	HiSeq
ecDNA(-)	LUSC	TCGA-90-7767-01	Primary Solid Tumor	TCGA-90-7767-01A-11R-2125-07	UNC	HiSeq
ecDNA(-)	LUAD	TCGA-91-6829-01	Primary Solid Tumor	TCGA-91-6829-01A-21R-1858-07	UNC	HiSeq
ecDNA(-)	LUAD	TCGA-91-6835-01	Primary Solid Tumor	TCGA-91-6835-01A-11R-1858-07	UNC	HiSeq
ecDNA(-)	LUAD	TCGA-97-8171-01	Primary Solid Tumor	TCGA-97-8171-01A-11R-2287-07	UNC	HiSeq
ecDNA(-)	BRCA	TCGA-A2-A04T-01	Primary Solid Tumor	TCGA-A2-A04T-01A-21R-A034-07	UNC	HiSeq
ecDNA(-)	BRCA	TCGA-A2-A0D2-01	Primary Solid Tumor	TCGA-A2-A0D2-01A-21R-A034-07	UNC	HiSeq
ecDNA(-)	BRCA	TCGA-A2-A0D4-01	Primary Solid Tumor	TCGA-A2-A0D4-01A-11R-A00Z-07	UNC	HiSeq
ecDNA(-)	BRCA	TCGA-A2-A0EU-01	Primary Solid Tumor	TCGA-A2-A0EU-01A-22R-A056-07	UNC	HiSeq
ecDNA(-)	BRCA	TCGA-A2-A259-01	Primary Solid Tumor	TCGA-A2-A259-01A-11R-A16F-07	UNC	HiSeq
ecDNA(-)	BRCA	TCGA-A2-A3Y0-01	Primary Solid Tumor	TCGA-A2-A3Y0-01A-11R-A239-07	UNC	HiSeq
ecDNA(-)	UCEC	TCGA-A5-A0G2-01	Primary Solid Tumor	TCGA-A5-A0G2-01A-11R-A16W-07	UNC	GA
ecDNA(-)	UCEC	TCGA-A5-A0G9-01	Primary Solid Tumor	TCGA-A5-A0G9-01A-11R-A040-07	UNC	GA
ecDNA(-)	UCEC	TCGA-A5-A0GA-01	Primary Solid Tumor	TCGA-A5-A0GA-01A-11R-A040-07	UNC	GA
ecDNA(-)	UCEC	TCGA-A5-A0GB-01	Primary Solid Tumor	TCGA-A5-A0GB-01A-11R-A040-07	UNC	GA
ecDNA(-)	UCEC	TCGA-A5-A0GD-01	Primary Solid Tumor	TCGA-A5-A0GD-01A-11R-A16W-07	UNC	GA
ecDNA(-)	UCEC	TCGA-A5-A0GG-01	Primary Solid Tumor	TCGA-A5-A0GG-01A-11R-A118-07	UNC	GA
ecDNA(-)	UCEC	TCGA-A5-A0GJ-01	Primary Solid Tumor	TCGA-A5-A0GJ-01A-11R-A040-07	UNC	GA
ecDNA(-)	UCEC	TCGA-A5-A0GN-01	Primary Solid Tumor	TCGA-A5-A0GN-01A-11R-A040-07	UNC	GA
ecDNA(-)	UCEC	TCGA-A5-A0GU-01	Primary Solid Tumor	TCGA-A5-A0GU-01A-11R-A16W-07	UNC	GA
ecDNA(-)	UCEC	TCGA-A5-A0GV-01	Primary Solid Tumor	TCGA-A5-A0GV-01A-31R-A16W-07	UNC	GA
ecDNA(-)	UCEC	TCGA-A5-A0GW-01	Primary Solid Tumor	TCGA-A5-A0GW-01A-11R-A16W-07	UNC	GA
ecDNA(-)	UCEC	TCGA-A5-A0GX-01	Primary Solid Tumor	TCGA-A5-A0GX-01A-11R-A040-07	UNC	GA
ecDNA(-)	UCEC	TCGA-A5-A0R6-01	Primary Solid Tumor	TCGA-A5-A0R6-01A-11R-A104-07	UNC	GA
ecDNA(-)	UCEC	TCGA-A5-A0R7-01	Primary Solid Tumor	TCGA-A5-A0R7-01A-31R-A16W-07	UNC	GA
ecDNA(-)	UCEC	TCGA-A5-A0R8-01	Primary Solid Tumor	TCGA-A5-A0R8-01A-11R-A104-07	UNC	GA
ecDNA(-)	UCEC	TCGA-A5-A0R9-01	Primary Solid Tumor	TCGA-A5-A0R9-01A-11R-A104-07	UNC	GA
ecDNA(-)	UCEC	TCGA-A5-A0RA-01	Primary Solid Tumor	TCGA-A5-A0RA-01A-21R-A104-07	UNC	GA
ecDNA(-)	UCEC	TCGA-A5-A0VP-01	Primary Solid Tumor	TCGA-A5-A0VP-01A-21R-A104-07	UNC	GA
ecDNA(-)	UCEC	TCGA-A5-A0VQ-01	Primary Solid Tumor	TCGA-A5-A0VQ-01A-11R-A104-07	UNC	GA
ecDNA(-)	BRCA	TCGA-A7-A0CE-01	Primary Solid Tumor	TCGA-A7-A0CE-01A-11R-A00Z-07	UNC	HiSeq
ecDNA(-)	BRCA	TCGA-A7-A0DC-01	Primary Solid Tumor	TCGA-A7-A0DC-01A-11R-A00Z-07	UNC	HiSeq
ecDNA(-)	BRCA	TCGA-A7-A26F-01	Primary Solid Tumor	TCGA-A7-A26F-01A-21R-A169-07	UNC	HiSeq
ecDNA(-)	BRCA	TCGA-A7-A26G-01	Primary Solid Tumor	TCGA-A7-A26G-01A-21R-A169-07	UNC	HiSeq
ecDNA(-)	BRCA	TCGA-A8-A075-01	Primary Solid Tumor	TCGA-A8-A075-01A-11R-A084-07	UNC	HiSeq
ecDNA(-)	BRCA	TCGA-A8-A08L-01	Primary Solid Tumor	TCGA-A8-A08L-01A-11R-A00Z-07	UNC	HiSeq
ecDNA(-)	BRCA	TCGA-A8-A094-01	Primary Solid Tumor	TCGA-A8-A094-01A-11R-A00Z-07	UNC	HiSeq
ecDNA(-)	BRCA	TCGA-A8-A09X-01	Primary Solid Tumor	TCGA-A8-A09X-01A-11R-A00Z-07	UNC	HiSeq
ecDNA(-)	UCEC	TCGA-AJ-A23M-01	Primary Solid Tumor	TCGA-AJ-A23M-01A-11R-A157-07	UNC	GA
ecDNA(-)	BRCA	TCGA-AN-A04D-01	Primary Solid Tumor	TCGA-AN-A04D-01A-21R-A034-07	UNC	HiSeq
ecDNA(-)	BRCA	TCGA-AN-A0AT-01	Primary Solid Tumor	TCGA-AN-A0AT-01A-11R-A034-07	UNC	HiSeq
ecDNA(-)	BRCA	TCGA-AO-A03N-01	Primary Solid Tumor	TCGA-AO-A03N-01B-11R-A10J-07	UNC	HiSeq
ecDNA(-)	BRCA	TCGA-AO-A0J2-01	Primary Solid Tumor	TCGA-AO-A0J2-01A-11R-A034-07	UNC	HiSeq
ecDNA(-)	BRCA	TCGA-AO-A0JF-01	Primary Solid Tumor	TCGA-AO-A0JF-01A-11R-A056-07	UNC	HiSeq
ecDNA(-)	BRCA	TCGA-AO-A0JJ-01	Primary Solid Tumor	TCGA-AO-A0JJ-01A-11R-A056-07	UNC	HiSeq
ecDNA(-)	BRCA	TCGA-AO-A12H-01	Primary Solid Tumor	TCGA-AO-A12H-01A-11R-A115-07	UNC	HiSeq
ecDNA(-)	UCEC	TCGA-AP-A051-01	Primary Solid Tumor	TCGA-AP-A051-01A-21R-A00V-07	UNC	GA
ecDNA(-)	UCEC	TCGA-AP-A052-01	Primary Solid Tumor	TCGA-AP-A052-01A-11R-A00V-07	UNC	GA
ecDNA(-)	UCEC	TCGA-AP-A054-01	Primary Solid Tumor	TCGA-AP-A054-01A-11R-A16W-07	UNC	GA
ecDNA(-)	UCEC	TCGA-AP-A05P-01	Primary Solid Tumor	TCGA-AP-A05P-01A-11R-A16W-07	UNC	GA
ecDNA(-)	UCEC	TCGA-AP-A0L8-01	Primary Solid Tumor	TCGA-AP-A0L8-01A-11R-A040-07	UNC	GA
ecDNA(-)	UCEC	TCGA-AP-A0L9-01	Primary Solid Tumor	TCGA-AP-A0L9-01A-11R-A040-07	UNC	GA
ecDNA(-)	UCEC	TCGA-AP-A0LD-01	Primary Solid Tumor	TCGA-AP-A0LD-01A-11R-A040-07	UNC	GA
ecDNA(-)	UCEC	TCGA-AP-A0LE-01	Primary Solid Tumor	TCGA-AP-A0LE-01A-11R-A104-07	UNC	GA
ecDNA(-)	UCEC	TCGA-AP-A0LI-01	Primary Solid Tumor	TCGA-AP-A0LI-01A-11R-A040-07	UNC	GA
ecDNA(-)	UCEC	TCGA-AP-A0LJ-01	Primary Solid Tumor	TCGA-AP-A0LJ-01A-11R-A040-07	UNC	GA
ecDNA(-)	UCEC	TCGA-AP-A0LL-01	Primary Solid Tumor	TCGA-AP-A0LL-01A-12R-A104-07	UNC	GA
ecDNA(-)	UCEC	TCGA-AP-A0LO-01	Primary Solid Tumor	TCGA-AP-A0LO-01A-11R-A040-07	UNC	GA
ecDNA(-)	UCEC	TCGA-AP-A0LP-01	Primary Solid Tumor	TCGA-AP-A0LP-01A-12R-A104-07	UNC	GA
ecDNA(-)	UCEC	TCGA-AP-A0LT-01	Primary Solid Tumor	TCGA-AP-A0LT-01A-11R-A040-07	UNC	GA
ecDNA(-)	BRCA	TCGA-AQ-A04J-01	Primary Solid Tumor	TCGA-AQ-A04J-01A-02R-A034-07	UNC	HiSeq
ecDNA(-)	BRCA	TCGA-AR-A256-01	Primary Solid Tumor	TCGA-AR-A256-01A-11R-A169-07	UNC	HiSeq
ecDNA(-)	UCEC	TCGA-AX-A05S-01	Primary Solid Tumor	TCGA-AX-A05S-01A-11R-A00V-07	UNC	GA
ecDNA(-)	UCEC	TCGA-AX-A06B-01	Primary Solid Tumor	TCGA-AX-A06B-01A-11R-A00V-07	UNC	GA
ecDNA(-)	UCEC	TCGA-AX-A0J1-01	Primary Solid Tumor	TCGA-AX-A0J1-01A-11R-A040-07	UNC	GA
ecDNA(-)	UCEC	TCGA-AX-A1CI-01	Primary Solid Tumor	TCGA-AX-A1CI-01A-11R-A137-07	UNC	GA
ecDNA(-)	UCEC	TCGA-AX-A1CJ-01	Primary Solid Tumor	TCGA-AX-A1CJ-01A-11R-A137-07	UNC	GA
ecDNA(-)	UCEC	TCGA-AX-A2HD-01	Primary Solid Tumor	TCGA-AX-A2HD-01A-21R-A17B-07	UNC	GA
ecDNA(-)	UCEC	TCGA-B5-A0JR-01	Primary Solid Tumor	TCGA-B5-A0JR-01A-13R-A466-07	UNC	HiSeq
ecDNA(-)	UCEC	TCGA-B5-A0JS-01	Primary Solid Tumor	TCGA-B5-A0JS-01A-11R-A104-07	UNC	GA
ecDNA(-)	UCEC	TCGA-B5-A0JV-01	Primary Solid Tumor	TCGA-B5-A0JV-01A-11R-A104-07	UNC	GA
ecDNA(-)	UCEC	TCGA-B5-A0JY-01	Primary Solid Tumor	TCGA-B5-A0JY-01A-11R-A104-07	UNC	GA
ecDNA(-)	UCEC	TCGA-B5-A0K0-01	Primary Solid Tumor	TCGA-B5-A0K0-01A-11R-A16W-07	UNC	GA
ecDNA(-)	UCEC	TCGA-B5-A0K1-01	Primary Solid Tumor	TCGA-B5-A0K1-01A-11R-A16W-07	UNC	GA
ecDNA(-)	UCEC	TCGA-B5-A0K3-01	Primary Solid Tumor	TCGA-B5-A0K3-01A-11R-A040-07	UNC	GA
ecDNA(-)	UCEC	TCGA-B5-A0K4-01	Primary Solid Tumor	TCGA-B5-A0K4-01A-11R-A040-07	UNC	GA
ecDNA(-)	UCEC	TCGA-B5-A0K6-01	Primary Solid Tumor	TCGA-B5-A0K6-01A-11R-A040-07	UNC	GA
ecDNA(-)	UCEC	TCGA-B5-A0K7-01	Primary Solid Tumor	TCGA-B5-A0K7-01A-11R-A104-07	UNC	GA
ecDNA(-)	UCEC	TCGA-B5-A0K8-01	Primary Solid Tumor	TCGA-B5-A0K8-01A-11R-A14M-07	UNC	GA
ecDNA(-)	UCEC	TCGA-B5-A0K9-01	Primary Solid Tumor	TCGA-B5-A0K9-01A-21R-A104-07	UNC	HiSeq
ecDNA(-)	UCEC	TCGA-B5-A11G-01	Primary Solid Tumor	TCGA-B5-A11G-01A-13R-A118-07	UNC	GA
ecDNA(-)	UCEC	TCGA-B5-A11H-01	Primary Solid Tumor	TCGA-B5-A11H-01A-11R-A118-07	UNC	GA
ecDNA(-)	BRCA	TCGA-B6-A0RI-01	Primary Solid Tumor	TCGA-B6-A0RI-01A-11R-A056-07	UNC	HiSeq
ecDNA(-)	BRCA	TCGA-B6-A0RT-01	Primary Solid Tumor	TCGA-B6-A0RT-01A-21R-A084-07	UNC	HiSeq
ecDNA(-)	BRCA	TCGA-B6-A0WX-01	Primary Solid Tumor	TCGA-B6-A0WX-01A-11R-A109-07	UNC	HiSeq
ecDNA(-)	BRCA	TCGA-B6-A0X4-01	Primary Solid Tumor	TCGA-B6-A0X4-01A-11R-A109-07	UNC	HiSeq
ecDNA(-)	BRCA	TCGA-B6-A0X5-01	Primary Solid Tumor	TCGA-B6-A0X5-01A-21R-A109-07	UNC	HiSeq
ecDNA(-)	STAD	TCGA-B7-5816-01	Primary Solid Tumor	TCGA-B7-5816-01A-21R-1602-13	BCGSC	HiSeq
ecDNA(-)	HNSC	TCGA-BA-4078-01	Primary Solid Tumor	TCGA-BA-4078-01A-01R-1436-07	UNC	HiSeq
ecDNA(-)	HNSC	TCGA-BA-5151-01	Primary Solid Tumor	TCGA-BA-5151-01A-01R-1436-07	UNC	HiSeq
ecDNA(-)	HNSC	TCGA-BA-5153-01	Primary Solid Tumor	TCGA-BA-5153-01A-01R-1436-07	UNC	HiSeq
ecDNA(-)	HNSC	TCGA-BA-5555-01	Primary Solid Tumor	TCGA-BA-5555-01A-01R-1514-07	UNC	HiSeq
ecDNA(-)	HNSC	TCGA-BA-5556-01	Primary Solid Tumor	TCGA-BA-5556-01A-01R-1514-07	UNC	HiSeq
ecDNA(-)	HNSC	TCGA-BA-5557-01	Primary Solid Tumor	TCGA-BA-5557-01A-01R-1514-07	UNC	HiSeq
ecDNA(-)	HNSC	TCGA-BA-5558-01	Primary Solid Tumor	TCGA-BA-5558-01A-01R-1514-07	UNC	HiSeq
ecDNA(-)	HNSC	TCGA-BA-5559-01	Primary Solid Tumor	TCGA-BA-5559-01A-01R-1514-07	UNC	HiSeq
ecDNA(-)	HNSC	TCGA-BA-6869-01	Primary Solid Tumor	TCGA-BA-6869-01A-11R-1873-07	UNC	HiSeq
ecDNA(-)	HNSC	TCGA-BA-6873-01	Primary Solid Tumor	TCGA-BA-6873-01A-11R-1873-07	UNC	HiSeq
ecDNA(-)	HNSC	TCGA-BA-A4IH-01	Primary Solid Tumor	TCGA-BA-A4IH-01A-11R-A266-07	UNC	HiSeq
ecDNA(-)	HNSC	TCGA-BB-4223-01	Primary Solid Tumor	TCGA-BB-4223-01A-01R-1436-07	UNC	HiSeq
ecDNA(-)	HNSC	TCGA-BB-4225-01	Primary Solid Tumor	TCGA-BB-4225-01A-01R-1436-07	UNC	HiSeq
ecDNA(-)	HNSC	TCGA-BB-4228-01	Primary Solid Tumor	TCGA-BB-4228-01A-01R-1436-07	UNC	HiSeq
ecDNA(-)	SKCM	TCGA-BF-A1PU-01	Primary Solid Tumor	TCGA-BF-A1PU-01A-11R-A18S-07	UNC	HiSeq
ecDNA(-)	SKCM	TCGA-BF-A1PV-01	Primary Solid Tumor	TCGA-BF-A1PV-01A-11R-A18U-07	UNC	HiSeq
ecDNA(-)	SKCM	TCGA-BF-A1PX-01	Primary Solid Tumor	TCGA-BF-A1PX-01A-12R-A18T-07	UNC	HiSeq
ecDNA(-)	SKCM	TCGA-BF-A1PZ-01	Primary Solid Tumor	TCGA-BF-A1PZ-01A-11R-A18S-07	UNC	HiSeq
ecDNA(-)	SKCM	TCGA-BF-A1Q0-01	Primary Solid Tumor	TCGA-BF-A1Q0-01A-21R-A18S-07	UNC	HiSeq
ecDNA(-)	UCEC	TCGA-BG-A0LW-01	Primary Solid Tumor	TCGA-BG-A0LW-01A-11R-A16W-07	UNC	GA
ecDNA(-)	UCEC	TCGA-BG-A0LX-01	Primary Solid Tumor	TCGA-BG-A0LX-01A-11R-A16W-07	UNC	GA
ecDNA(-)	UCEC	TCGA-BG-A0M0-01	Primary Solid Tumor	TCGA-BG-A0M0-01A-11R-A104-07	UNC	GA
ecDNA(-)	UCEC	TCGA-BG-A0M2-01	Primary Solid Tumor	TCGA-BG-A0M2-01A-11R-A104-07	UNC	GA
ecDNA(-)	UCEC	TCGA-BG-A0M3-01	Primary Solid Tumor	TCGA-BG-A0M3-01A-11R-A104-07	UNC	GA
ecDNA(-)	UCEC	TCGA-BG-A0M4-01	Primary Solid Tumor	TCGA-BG-A0M4-01A-11R-A104-07	UNC	GA
ecDNA(-)	UCEC	TCGA-BG-A0M9-01	Primary Solid Tumor	TCGA-BG-A0M9-01A-21R-A104-07	UNC	GA
ecDNA(-)	UCEC	TCGA-BG-A0MC-01	Primary Solid Tumor	TCGA-BG-A0MC-01A-21R-A040-07	UNC	GA
ecDNA(-)	UCEC	TCGA-BG-A0MG-01	Primary Solid Tumor	TCGA-BG-A0MG-01A-21R-A104-07	UNC	GA
ecDNA(-)	UCEC	TCGA-BG-A0MO-01	Primary Solid Tumor	TCGA-BG-A0MO-01A-11R-A040-07	UNC	GA
ecDNA(-)	UCEC	TCGA-BG-A0MQ-01	Primary Solid Tumor	TCGA-BG-A0MQ-01A-11R-A104-07	UNC	GA
ecDNA(-)	UCEC	TCGA-BG-A0MT-01	Primary Solid Tumor	TCGA-BG-A0MT-01A-11R-A104-07	UNC	GA
ecDNA(-)	UCEC	TCGA-BG-A0MU-01	Primary Solid Tumor	TCGA-BG-A0MU-01A-11R-A104-07	UNC	GA
ecDNA(-)	UCEC	TCGA-BG-A0RY-01	Primary Solid Tumor	TCGA-BG-A0RY-01A-11R-A104-07	UNC	GA
ecDNA(-)	UCEC	TCGA-BG-A186-01	Primary Solid Tumor	TCGA-BG-A186-01A-11R-A12I-07	UNC	GA
ecDNA(-)	UCEC	TCGA-BG-A18A-01	Primary Solid Tumor	TCGA-BG-A18A-01A-21R-A12I-07	UNC	GA
ecDNA(-)	UCEC	TCGA-BG-A18C-01	Primary Solid Tumor	TCGA-BG-A18C-01A-11R-A12I-07	UNC	GA
ecDNA(-)	BRCA	TCGA-BH-A0AV-01	Primary Solid Tumor	TCGA-BH-A0AV-01A-31R-A115-07	UNC	HiSeq
ecDNA(-)	BRCA	TCGA-BH-A0B3-01	Primary Solid Tumor	TCGA-BH-A0B3-01A-11R-A056-07	UNC	HiSeq
ecDNA(-)	BRCA	TCGA-BH-A0BM-01	Primary Solid Tumor	TCGA-BH-A0BM-01A-11R-A056-07	UNC	HiSeq
ecDNA(-)	BRCA	TCGA-BH-A0BW-01	Primary Solid Tumor	TCGA-BH-A0BW-01A-11R-A115-07	UNC	HiSeq
ecDNA(-)	BRCA	TCGA-BH-A0DK-01	Primary Solid Tumor	TCGA-BH-A0DK-01A-21R-A056-07	UNC	HiSeq
ecDNA(-)	BRCA	TCGA-BH-A0DT-01	Primary Solid Tumor	TCGA-BH-A0DT-01A-21R-A12D-07	UNC	HiSeq
ecDNA(-)	BRCA	TCGA-BH-A0EA-01	Primary Solid Tumor	TCGA-BH-A0EA-01A-11R-A115-07	UNC	HiSeq
ecDNA(-)	BRCA	TCGA-BH-A0H0-01	Primary Solid Tumor	TCGA-BH-A0H0-01A-11R-A056-07	UNC	HiSeq
ecDNA(-)	BRCA	TCGA-BH-A0HK-01	Primary Solid Tumor	TCGA-BH-A0HK-01A-11R-A056-07	UNC	HiSeq
ecDNA(-)	BRCA	TCGA-BH-A0W5-01	Primary Solid Tumor	TCGA-BH-A0W5-01A-11R-A109-07	UNC	HiSeq
ecDNA(-)	BRCA	TCGA-BH-A1FC-01	Primary Solid Tumor	TCGA-BH-A1FC-01A-11R-A13Q-07	UNC	HiSeq
ecDNA(-)	UCEC	TCGA-BK-A0CA-01	Primary Solid Tumor	TCGA-BK-A0CA-01A-21R-A118-07	UNC	GA
ecDNA(-)	UCEC	TCGA-BK-A0CB-01	Primary Solid Tumor	TCGA-BK-A0CB-01A-32R-A104-07	UNC	GA
ecDNA(-)	UCEC	TCGA-BK-A0CC-01	Primary Solid Tumor	TCGA-BK-A0CC-01A-21R-A16W-07	UNC	GA
ecDNA(-)	BLCA	TCGA-BL-A13I-01	Primary Solid Tumor	TCGA-BL-A13I-01A-11R-A13Y-07	UNC	HiSeq
ecDNA(-)	BLCA	TCGA-BL-A3JM-01	Primary Solid Tumor	TCGA-BL-A3JM-01A-12R-A21D-07	UNC	HiSeq
ecDNA(-)	STAD	TCGA-BR-4187-01	Primary Solid Tumor	TCGA-BR-4187-01A-01R-1131-13	BCGSC	HiSeq
ecDNA(-)	STAD	TCGA-BR-4191-01	Primary Solid Tumor	TCGA-BR-4191-01A-02R-1131-13	BCGSC	GA
ecDNA(-)	STAD	TCGA-BR-4201-01	Primary Solid Tumor	TCGA-BR-4201-01A-01R-1131-13	BCGSC	GA
ecDNA(-)	STAD	TCGA-BR-4253-01	Primary Solid Tumor	TCGA-BR-4253-01A-01R-1131-13	BCGSC	GA
ecDNA(-)	STAD	TCGA-BR-4256-01	Primary Solid Tumor	TCGA-BR-4256-01A-01R-1131-13	BCGSC	GA
ecDNA(-)	STAD	TCGA-BR-4257-01	Primary Solid Tumor	TCGA-BR-4257-01A-01R-1131-13	BCGSC	HiSeq
ecDNA(-)	STAD	TCGA-BR-4279-01	Primary Solid Tumor	TCGA-BR-4279-01A-01R-1131-13	BCGSC	GA
ecDNA(-)	STAD	TCGA-BR-4280-01	Primary Solid Tumor	TCGA-BR-4280-01A-01R-1131-13	BCGSC	HiSeq
ecDNA(-)	STAD	TCGA-BR-4292-01	Primary Solid Tumor	TCGA-BR-4292-01A-01R-1131-13	BCGSC	HiSeq
ecDNA(-)	STAD	TCGA-BR-4363-01	Primary Solid Tumor	TCGA-BR-4363-01A-01R-1157-13	BCGSC	GA
ecDNA(-)	STAD	TCGA-BR-4368-01	Primary Solid Tumor	TCGA-BR-4368-01A-01R-1157-13	BCGSC	GA
ecDNA(-)	STAD	TCGA-BR-4370-01	Primary Solid Tumor	TCGA-BR-4370-01A-01R-1157-13	BCGSC	GA
ecDNA(-)	STAD	TCGA-BR-6452-01	Primary Solid Tumor	TCGA-BR-6452-01A-12R-1802-13	BCGSC	HiSeq
ecDNA(-)	STAD	TCGA-BR-6453-01	Primary Solid Tumor	TCGA-BR-6453-01A-11R-1802-13	BCGSC	HiSeq
ecDNA(-)	STAD	TCGA-BR-6454-01	Primary Solid Tumor	TCGA-BR-6454-01A-11R-1802-13	BCGSC	HiSeq
ecDNA(-)	STAD	TCGA-BR-6455-01	Primary Solid Tumor	TCGA-BR-6455-01A-11R-1802-13	BCGSC	HiSeq
ecDNA(-)	STAD	TCGA-BR-6456-01	Primary Solid Tumor	TCGA-BR-6456-01A-11R-1802-13	BCGSC	HiSeq
ecDNA(-)	STAD	TCGA-BR-6457-01	Primary Solid Tumor	TCGA-BR-6457-01A-21R-1802-13	BCGSC	HiSeq
ecDNA(-)	STAD	TCGA-BR-6564-01	Primary Solid Tumor	TCGA-BR-6564-01A-12R-1884-13	BCGSC	HiSeq
ecDNA(-)	STAD	TCGA-BR-6565-01	Primary Solid Tumor	TCGA-BR-6565-01A-11R-1802-13	BCGSC	HiSeq
ecDNA(-)	STAD	TCGA-BR-6566-01	Primary Solid Tumor	TCGA-BR-6566-01A-11R-1802-13	BCGSC	HiSeq
ecDNA(-)	STAD	TCGA-BR-6707-01	Primary Solid Tumor	TCGA-BR-6707-01A-11R-1884-13	BCGSC	HiSeq
ecDNA(-)	STAD	TCGA-BR-6801-01	Primary Solid Tumor	TCGA-BR-6801-01A-11R-1884-13	BCGSC	HiSeq
ecDNA(-)	STAD	TCGA-BR-6802-01	Primary Solid Tumor	TCGA-BR-6802-01A-11R-1884-13	BCGSC	HiSeq
ecDNA(-)	STAD	TCGA-BR-6803-01	Primary Solid Tumor	TCGA-BR-6803-01A-11R-1884-13	BCGSC	HiSeq
ecDNA(-)	STAD	TCGA-BR-6852-01	Primary Solid Tumor	TCGA-BR-6852-01A-11R-1884-13	BCGSC	HiSeq
ecDNA(-)	STAD	TCGA-BR-7722-01	Primary Solid Tumor	TCGA-BR-7722-01A-31R-2203-13	BCGSC	HiSeq
ecDNA(-)	STAD	TCGA-BR-8373-01	Primary Solid Tumor	TCGA-BR-8373-01A-11R-2343-13	BCGSC	HiSeq
ecDNA(-)	STAD	TCGA-BR-8381-01	Primary Solid Tumor	TCGA-BR-8381-01A-11R-2402-13	BCGSC	HiSeq
ecDNA(-)	STAD	TCGA-BR-8682-01	Primary Solid Tumor	TCGA-BR-8682-01A-11R-2402-13	BCGSC	HiSeq
ecDNA(-)	STAD	TCGA-BR-8690-01	Primary Solid Tumor	TCGA-BR-8690-01A-11R-2402-13	BCGSC	HiSeq
ecDNA(-)	UCEC	TCGA-BS-A0T9-01	Primary Solid Tumor	TCGA-BS-A0T9-01A-11R-A12I-07	UNC	GA
ecDNA(-)	UCEC	TCGA-BS-A0TC-01	Primary Solid Tumor	TCGA-BS-A0TC-01A-11R-A104-07	UNC	GA
ecDNA(-)	UCEC	TCGA-BS-A0TD-01	Primary Solid Tumor	TCGA-BS-A0TD-01A-11R-A104-07	UNC	GA
ecDNA(-)	UCEC	TCGA-BS-A0TE-01	Primary Solid Tumor	TCGA-BS-A0TE-01A-11R-A104-07	UNC	GA
ecDNA(-)	UCEC	TCGA-BS-A0TG-01	Primary Solid Tumor	TCGA-BS-A0TG-01A-32R-A16W-07	UNC	GA
ecDNA(-)	UCEC	TCGA-BS-A0TI-01	Primary Solid Tumor	TCGA-BS-A0TI-01A-11R-A104-07	UNC	GA
ecDNA(-)	UCEC	TCGA-BS-A0TJ-01	Primary Solid Tumor	TCGA-BS-A0TJ-01A-11R-A104-07	UNC	GA
ecDNA(-)	UCEC	TCGA-BS-A0U7-01	Primary Solid Tumor	TCGA-BS-A0U7-01A-21R-A104-07	UNC	GA
ecDNA(-)	UCEC	TCGA-BS-A0U8-01	Primary Solid Tumor	TCGA-BS-A0U8-01A-11R-A104-07	UNC	GA
ecDNA(-)	UCEC	TCGA-BS-A0UF-01	Primary Solid Tumor	TCGA-BS-A0UF-01A-11R-A104-07	UNC	GA
ecDNA(-)	UCEC	TCGA-BS-A0UJ-01	Primary Solid Tumor	TCGA-BS-A0UJ-01A-12R-A104-07	UNC	GA
ecDNA(-)	UCEC	TCGA-BS-A0UT-01	Primary Solid Tumor	TCGA-BS-A0UT-01A-11R-A104-07	UNC	GA
ecDNA(-)	UCEC	TCGA-BS-A0UV-01	Primary Solid Tumor	TCGA-BS-A0UV-01A-11R-A16W-07	UNC	GA
ecDNA(-)	UCEC	TCGA-BS-A0V8-01	Primary Solid Tumor	TCGA-BS-A0V8-01A-11R-A118-07	UNC	GA
ecDNA(-)	BLCA	TCGA-BT-A0YX-01	Primary Solid Tumor	TCGA-BT-A0YX-01A-11R-A10U-07	UNC	HiSeq
ecDNA(-)	BLCA	TCGA-BT-A20O-01	Primary Solid Tumor	TCGA-BT-A20O-01A-21R-A14Y-07	UNC	HiSeq
ecDNA(-)	BLCA	TCGA-BT-A20T-01	Primary Solid Tumor	TCGA-BT-A20T-01A-11R-A14Y-07	UNC	HiSeq
ecDNA(-)	BLCA	TCGA-BT-A20U-01	Primary Solid Tumor	TCGA-BT-A20U-01A-11R-A14Y-07	UNC	HiSeq
ecDNA(-)	BLCA	TCGA-BT-A20X-01	Primary Solid Tumor	TCGA-BT-A20X-01A-11R-A16R-07	UNC	HiSeq
ecDNA(-)	BLCA	TCGA-BT-A3PH-01	Primary Solid Tumor	TCGA-BT-A3PH-01A-11R-A220-07	UNC	HiSeq
ecDNA(-)	BLCA	TCGA-BT-A3PK-01	Primary Solid Tumor	TCGA-BT-A3PK-01A-21R-A220-07	UNC	HiSeq
ecDNA(-)	CESC	TCGA-C5-A1BF-01	Primary Solid Tumor	TCGA-C5-A1BF-01B-11R-A13Y-07	UNC	HiSeq
ecDNA(-)	CESC	TCGA-C5-A1BQ-01	Primary Solid Tumor	TCGA-C5-A1BQ-01C-11R-A213-07	UNC	HiSeq
ecDNA(-)	CESC	TCGA-C5-A1M8-01	Primary Solid Tumor	TCGA-C5-A1M8-01A-21R-A13Y-07	UNC	HiSeq
ecDNA(-)	CESC	TCGA-C5-A1MI-01	Primary Solid Tumor	TCGA-C5-A1MI-01A-11R-A14Y-07	UNC	HiSeq
ecDNA(-)	CESC	TCGA-C5-A2LS-01	Primary Solid Tumor	TCGA-C5-A2LS-01A-22R-A22U-07	UNC	HiSeq
ecDNA(-)	CESC	TCGA-C5-A2LT-01	Primary Solid Tumor	TCGA-C5-A2LT-01A-11R-A18M-07	UNC	HiSeq
ecDNA(-)	CESC	TCGA-C5-A2LZ-01	Primary Solid Tumor	TCGA-C5-A2LZ-01A-11R-A213-07	UNC	HiSeq
ecDNA(-)	CESC	TCGA-C5-A3HF-01	Primary Solid Tumor	TCGA-C5-A3HF-01A-11R-A213-07	UNC	HiSeq
ecDNA(-)	CESC	TCGA-C5-A3HL-01	Primary Solid Tumor	TCGA-C5-A3HL-01A-11R-A213-07	UNC	HiSeq
ecDNA(-)	STAD	TCGA-CD-5798-01	Primary Solid Tumor	TCGA-CD-5798-01A-11R-1602-13	BCGSC	HiSeq
ecDNA(-)	STAD	TCGA-CD-5801-01	Primary Solid Tumor	TCGA-CD-5801-01A-11R-1602-13	BCGSC	HiSeq
ecDNA(-)	STAD	TCGA-CD-5803-01	Primary Solid Tumor	TCGA-CD-5803-01A-11R-1602-13	BCGSC	HiSeq
ecDNA(-)	STAD	TCGA-CD-8529-01	Primary Solid Tumor	TCGA-CD-8529-01A-11R-2343-13	BCGSC	HiSeq
ecDNA(-)	BLCA	TCGA-CF-A1HR-01	Primary Solid Tumor	TCGA-CF-A1HR-01A-11R-A13Y-07	UNC	HiSeq
ecDNA(-)	BLCA	TCGA-CF-A27C-01	Primary Solid Tumor	TCGA-CF-A27C-01A-11R-A16R-07	UNC	HiSeq
ecDNA(-)	BLCA	TCGA-CF-A3MF-01	Primary Solid Tumor	TCGA-CF-A3MF-01A-12R-A21D-07	UNC	HiSeq
ecDNA(-)	BLCA	TCGA-CF-A3MH-01	Primary Solid Tumor	TCGA-CF-A3MH-01A-11R-A20F-07	UNC	HiSeq
ecDNA(-)	STAD	TCGA-CG-4304-01	Primary Solid Tumor	TCGA-CG-4304-01A-01R-1157-13	BCGSC	GA
ecDNA(-)	STAD	TCGA-CG-4305-01	Primary Solid Tumor	TCGA-CG-4305-01A-01R-1157-13	BCGSC	GA
ecDNA(-)	STAD	TCGA-CG-4306-01	Primary Solid Tumor	TCGA-CG-4306-01A-01R-1157-13	BCGSC	GA
ecDNA(-)	STAD	TCGA-CG-4436-01	Primary Solid Tumor	TCGA-CG-4436-01A-01R-1157-13	BCGSC	GA
ecDNA(-)	STAD	TCGA-CG-4437-01	Primary Solid Tumor	TCGA-CG-4437-01A-01R-1802-13	BCGSC	HiSeq
ecDNA(-)	STAD	TCGA-CG-4441-01	Primary Solid Tumor	TCGA-CG-4441-01A-01R-1802-13	BCGSC	HiSeq
ecDNA(-)	STAD	TCGA-CG-4442-01	Primary Solid Tumor	TCGA-CG-4442-01A-01R-1157-13	BCGSC	GA
ecDNA(-)	STAD	TCGA-CG-4462-01	Primary Solid Tumor	TCGA-CG-4462-01A-01R-1157-13	BCGSC	GA
ecDNA(-)	STAD	TCGA-CG-4465-01	Primary Solid Tumor	TCGA-CG-4465-01A-01R-1157-13	BCGSC	GA
ecDNA(-)	STAD	TCGA-CG-4474-01	Primary Solid Tumor	TCGA-CG-4474-01A-02R-1157-13	BCGSC	GA
ecDNA(-)	STAD	TCGA-CG-4477-01	Primary Solid Tumor	TCGA-CG-4477-01A-01R-1157-13	BCGSC	GA
ecDNA(-)	STAD	TCGA-CG-5717-01	Primary Solid Tumor	TCGA-CG-5717-01A-11R-1602-13	BCGSC	HiSeq
ecDNA(-)	STAD	TCGA-CG-5719-01	Primary Solid Tumor	TCGA-CG-5719-01A-11R-1602-13	BCGSC	HiSeq
ecDNA(-)	STAD	TCGA-CG-5720-01	Primary Solid Tumor	TCGA-CG-5720-01A-11R-1602-13	BCGSC	HiSeq
ecDNA(-)	STAD	TCGA-CG-5721-01	Primary Solid Tumor	TCGA-CG-5721-01A-11R-1602-13	BCGSC	HiSeq
ecDNA(-)	STAD	TCGA-CG-5722-01	Primary Solid Tumor	TCGA-CG-5722-01A-21R-1602-13	BCGSC	HiSeq
ecDNA(-)	STAD	TCGA-CG-5723-01	Primary Solid Tumor	TCGA-CG-5723-01A-11R-1602-13	BCGSC	HiSeq
ecDNA(-)	STAD	TCGA-CG-5726-01	Primary Solid Tumor	TCGA-CG-5726-01A-11R-1602-13	BCGSC	HiSeq
ecDNA(-)	HNSC	TCGA-CN-4722-01	Primary Solid Tumor	TCGA-CN-4722-01A-01R-1436-07	UNC	HiSeq
ecDNA(-)	HNSC	TCGA-CN-4730-01	Primary Solid Tumor	TCGA-CN-4730-01A-01R-1436-07	UNC	HiSeq
ecDNA(-)	HNSC	TCGA-CN-4731-01	Primary Solid Tumor	TCGA-CN-4731-01A-01R-1436-07	UNC	HiSeq
ecDNA(-)	HNSC	TCGA-CN-4733-01	Primary Solid Tumor	TCGA-CN-4733-01A-02R-1873-07	UNC	HiSeq
ecDNA(-)	HNSC	TCGA-CN-4738-01	Primary Solid Tumor	TCGA-CN-4738-01A-02R-1514-07	UNC	HiSeq
ecDNA(-)	HNSC	TCGA-CN-4739-01	Primary Solid Tumor	TCGA-CN-4739-01A-02R-1514-07	UNC	HiSeq
ecDNA(-)	HNSC	TCGA-CN-5355-01	Primary Solid Tumor	TCGA-CN-5355-01A-01R-1436-07	UNC	HiSeq
ecDNA(-)	HNSC	TCGA-CN-5356-01	Primary Solid Tumor	TCGA-CN-5356-01A-01R-1436-07	UNC	HiSeq
ecDNA(-)	HNSC	TCGA-CN-5360-01	Primary Solid Tumor	TCGA-CN-5360-01A-01R-1436-07	UNC	HiSeq
ecDNA(-)	HNSC	TCGA-CN-5364-01	Primary Solid Tumor	TCGA-CN-5364-01A-01R-1436-07	UNC	HiSeq
ecDNA(-)	HNSC	TCGA-CN-5369-01	Primary Solid Tumor	TCGA-CN-5369-01A-01R-1436-07	UNC	HiSeq
ecDNA(-)	HNSC	TCGA-CN-5373-01	Primary Solid Tumor	TCGA-CN-5373-01A-01R-1436-07	UNC	HiSeq
ecDNA(-)	HNSC	TCGA-CN-6017-01	Primary Solid Tumor	TCGA-CN-6017-01A-11R-1686-07	UNC	HiSeq
ecDNA(-)	HNSC	TCGA-CN-6019-01	Primary Solid Tumor	TCGA-CN-6019-01A-11R-1686-07	UNC	HiSeq
ecDNA(-)	HNSC	TCGA-CN-6998-01	Primary Solid Tumor	TCGA-CN-6998-01A-23R-2016-07	UNC	HiSeq
ecDNA(-)	HNSC	TCGA-CQ-5325-01	Primary Solid Tumor	TCGA-CQ-5325-01A-01R-1686-07	UNC	HiSeq
ecDNA(-)	HNSC	TCGA-CQ-5327-01	Primary Solid Tumor	TCGA-CQ-5327-01A-01R-1686-07	UNC	HiSeq
ecDNA(-)	HNSC	TCGA-CQ-6220-01	Primary Solid Tumor	TCGA-CQ-6220-01A-11R-1915-07	UNC	HiSeq
ecDNA(-)	HNSC	TCGA-CQ-6224-01	Primary Solid Tumor	TCGA-CQ-6224-01A-11R-1915-07	UNC	HiSeq
ecDNA(-)	HNSC	TCGA-CQ-7068-01	Primary Solid Tumor	TCGA-CQ-7068-01A-11R-2081-07	UNC	HiSeq
ecDNA(-)	HNSC	TCGA-CR-5243-01	Primary Solid Tumor	TCGA-CR-5243-01A-01R-1514-07	UNC	HiSeq
ecDNA(-)	HNSC	TCGA-CR-5248-01	Primary Solid Tumor	TCGA-CR-5248-01A-01R-2016-07	UNC	HiSeq
ecDNA(-)	HNSC	TCGA-CR-5249-01	Primary Solid Tumor	TCGA-CR-5249-01A-01R-1514-07	UNC	HiSeq
ecDNA(-)	HNSC	TCGA-CR-5250-01	Primary Solid Tumor	TCGA-CR-5250-01A-01R-1514-07	UNC	HiSeq
ecDNA(-)	HNSC	TCGA-CR-6467-01	Primary Solid Tumor	TCGA-CR-6467-01A-11R-1873-07	UNC	HiSeq
ecDNA(-)	HNSC	TCGA-CR-6470-01	Primary Solid Tumor	TCGA-CR-6470-01A-11R-1873-07	UNC	HiSeq
ecDNA(-)	HNSC	TCGA-CR-6471-01	Primary Solid Tumor	TCGA-CR-6471-01A-11R-1873-07	UNC	HiSeq
ecDNA(-)	HNSC	TCGA-CR-6472-01	Primary Solid Tumor	TCGA-CR-6472-01A-11R-1873-07	UNC	HiSeq
ecDNA(-)	HNSC	TCGA-CR-6480-01	Primary Solid Tumor	TCGA-CR-6480-01A-11R-1873-07	UNC	HiSeq
ecDNA(-)	HNSC	TCGA-CR-6481-01	Primary Solid Tumor	TCGA-CR-6481-01A-11R-1873-07	UNC	HiSeq
ecDNA(-)	HNSC	TCGA-CR-7368-01	Primary Solid Tumor	TCGA-CR-7368-01A-11R-2132-07	UNC	HiSeq
ecDNA(-)	HNSC	TCGA-CR-7382-01	Primary Solid Tumor	TCGA-CR-7382-01A-11R-2132-07	UNC	HiSeq
ecDNA(-)	HNSC	TCGA-CR-7385-01	Primary Solid Tumor	TCGA-CR-7385-01A-11R-2016-07	UNC	HiSeq
ecDNA(-)	HNSC	TCGA-CR-7391-01	Primary Solid Tumor	TCGA-CR-7391-01A-11R-2016-07	UNC	HiSeq
ecDNA(-)	LGG	TCGA-CS-4938-01	Primary Solid Tumor	TCGA-CS-4938-01B-11R-1896-07	UNC	HiSeq
ecDNA(-)	LGG	TCGA-CS-4944-01	Primary Solid Tumor	TCGA-CS-4944-01A-01R-1470-07	UNC	HiSeq
ecDNA(-)	LGG	TCGA-CS-5396-01	Primary Solid Tumor	TCGA-CS-5396-01A-02R-1470-07	UNC	HiSeq
ecDNA(-)	LGG	TCGA-CS-6186-01	Primary Solid Tumor	TCGA-CS-6186-01A-12R-2027-07	UNC	HiSeq
ecDNA(-)	LGG	TCGA-CS-6290-01	Primary Solid Tumor	TCGA-CS-6290-01A-11R-1708-07	UNC	HiSeq
ecDNA(-)	LGG	TCGA-CS-6668-01	Primary Solid Tumor	TCGA-CS-6668-01A-11R-1896-07	UNC	HiSeq
ecDNA(-)	LGG	TCGA-CS-6669-01	Primary Solid Tumor	TCGA-CS-6669-01A-11R-1896-07	UNC	HiSeq
ecDNA(-)	BLCA	TCGA-CU-A0YO-01	Primary Solid Tumor	TCGA-CU-A0YO-01A-11R-A10U-07	UNC	HiSeq
ecDNA(-)	BLCA	TCGA-CU-A3YL-01	Primary Solid Tumor	TCGA-CU-A3YL-01A-11R-A22U-07	UNC	HiSeq
ecDNA(-)	HNSC	TCGA-CV-5439-01	Primary Solid Tumor	TCGA-CV-5439-01A-01R-1686-07	UNC	HiSeq
ecDNA(-)	HNSC	TCGA-CV-5966-01	Primary Solid Tumor	TCGA-CV-5966-01A-11R-1686-07	UNC	HiSeq
ecDNA(-)	HNSC	TCGA-CV-5970-01	Primary Solid Tumor	TCGA-CV-5970-01A-11R-1686-07	UNC	HiSeq
ecDNA(-)	HNSC	TCGA-CV-5971-01	Primary Solid Tumor	TCGA-CV-5971-01A-11R-1686-07	UNC	HiSeq
ecDNA(-)	HNSC	TCGA-CV-6003-01	Primary Solid Tumor	TCGA-CV-6003-01A-11R-1686-07	UNC	HiSeq
ecDNA(-)	HNSC	TCGA-CV-6433-01	Primary Solid Tumor	TCGA-CV-6433-01A-11R-1686-07	UNC	HiSeq
ecDNA(-)	HNSC	TCGA-CV-6938-01	Primary Solid Tumor	TCGA-CV-6938-01A-11R-1915-07	UNC	HiSeq
ecDNA(-)	HNSC	TCGA-CV-6939-01	Primary Solid Tumor	TCGA-CV-6939-01A-11R-1915-07	UNC	HiSeq
ecDNA(-)	HNSC	TCGA-CV-6945-01	Primary Solid Tumor	TCGA-CV-6945-01A-11R-1915-07	UNC	HiSeq
ecDNA(-)	HNSC	TCGA-CV-6951-01	Primary Solid Tumor	TCGA-CV-6951-01A-11R-1915-07	UNC	HiSeq
ecDNA(-)	HNSC	TCGA-CV-6952-01	Primary Solid Tumor	TCGA-CV-6952-01A-11R-1915-07	UNC	HiSeq
ecDNA(-)	HNSC	TCGA-CV-6954-01	Primary Solid Tumor	TCGA-CV-6954-01A-11R-1915-07	UNC	HiSeq
ecDNA(-)	HNSC	TCGA-CV-6956-01	Primary Solid Tumor	TCGA-CV-6956-01A-21R-2016-07	UNC	HiSeq
ecDNA(-)	HNSC	TCGA-CV-6959-01	Primary Solid Tumor	TCGA-CV-6959-01A-11R-1915-07	UNC	HiSeq
ecDNA(-)	HNSC	TCGA-CV-6961-01	Primary Solid Tumor	TCGA-CV-6961-01A-21R-1915-07	UNC	HiSeq
ecDNA(-)	HNSC	TCGA-CV-7178-01	Primary Solid Tumor	TCGA-CV-7178-01A-21R-2016-07	UNC	HiSeq
ecDNA(-)	HNSC	TCGA-CV-7180-01	Primary Solid Tumor	TCGA-CV-7180-01A-11R-2016-07	UNC	HiSeq
ecDNA(-)	HNSC	TCGA-CV-7183-01	Primary Solid Tumor	TCGA-CV-7183-01A-11R-2016-07	UNC	HiSeq
ecDNA(-)	HNSC	TCGA-CV-7238-01	Primary Solid Tumor	TCGA-CV-7238-01A-11R-2016-07	UNC	HiSeq
ecDNA(-)	HNSC	TCGA-CV-7263-01	Primary Solid Tumor	TCGA-CV-7263-01A-11R-2016-07	UNC	HiSeq
ecDNA(-)	HNSC	TCGA-CV-7411-01	Primary Solid Tumor	TCGA-CV-7411-01A-11R-2081-07	UNC	HiSeq
ecDNA(-)	HNSC	TCGA-CV-7429-01	Primary Solid Tumor	TCGA-CV-7429-01A-11R-2132-07	UNC	HiSeq
ecDNA(-)	HNSC	TCGA-CV-7432-01	Primary Solid Tumor	TCGA-CV-7432-01A-11R-2132-07	UNC	HiSeq
ecDNA(-)	HNSC	TCGA-CX-7085-01	Primary Solid Tumor	TCGA-CX-7085-01A-21R-2016-07	UNC	HiSeq
ecDNA(-)	UCEC	TCGA-D1-A168-01	Primary Solid Tumor	TCGA-D1-A168-01A-31R-A12I-07	UNC	GA
ecDNA(-)	UCEC	TCGA-D1-A16B-01	Primary Solid Tumor	TCGA-D1-A16B-01A-11R-A12I-07	UNC	GA
ecDNA(-)	UCEC	TCGA-D1-A16D-01	Primary Solid Tumor	TCGA-D1-A16D-01A-11R-A12I-07	UNC	GA
ecDNA(-)	UCEC	TCGA-D1-A16E-01	Primary Solid Tumor	TCGA-D1-A16E-01A-22R-A12I-07	UNC	GA
ecDNA(-)	UCEC	TCGA-D1-A16Q-01	Primary Solid Tumor	TCGA-D1-A16Q-01A-12R-A12I-07	UNC	GA
ecDNA(-)	UCEC	TCGA-D1-A16R-01	Primary Solid Tumor	TCGA-D1-A16R-01A-11R-A12I-07	UNC	GA
ecDNA(-)	UCEC	TCGA-D1-A16X-01	Primary Solid Tumor	TCGA-D1-A16X-01A-11R-A12I-07	UNC	GA
ecDNA(-)	UCEC	TCGA-D1-A174-01	Primary Solid Tumor	TCGA-D1-A174-01A-11R-A12I-07	UNC	GA
ecDNA(-)	UCEC	TCGA-D1-A177-01	Primary Solid Tumor	TCGA-D1-A177-01A-21R-A12I-07	UNC	GA
ecDNA(-)	UCEC	TCGA-D1-A17B-01	Primary Solid Tumor	TCGA-D1-A17B-01A-22R-A12I-07	UNC	GA
ecDNA(-)	UCEC	TCGA-D1-A17C-01	Primary Solid Tumor	TCGA-D1-A17C-01A-11R-A12I-07	UNC	GA
ecDNA(-)	UCEC	TCGA-D1-A17D-01	Primary Solid Tumor	TCGA-D1-A17D-01A-12R-A12I-07	UNC	GA
ecDNA(-)	UCEC	TCGA-D1-A17N-01	Primary Solid Tumor	TCGA-D1-A17N-01A-11R-A12I-07	UNC	GA
ecDNA(-)	UCEC	TCGA-D1-A17Q-01	Primary Solid Tumor	TCGA-D1-A17Q-01A-11R-A12I-07	UNC	GA
ecDNA(-)	UCEC	TCGA-D1-A17R-01	Primary Solid Tumor	TCGA-D1-A17R-01A-11R-A12I-07	UNC	GA
ecDNA(-)	UCEC	TCGA-D1-A17U-01	Primary Solid Tumor	TCGA-D1-A17U-01A-21R-A12I-07	UNC	GA
ecDNA(-)	UCEC	TCGA-D1-A2G0-01	Primary Solid Tumor	TCGA-D1-A2G0-01A-11R-A32Y-07	UNC	HiSeq
ecDNA(-)	HNSC	TCGA-D6-6515-01	Primary Solid Tumor	TCGA-D6-6515-01A-21R-1873-07	UNC	HiSeq
ecDNA(-)	HNSC	TCGA-D6-6517-01	Primary Solid Tumor	TCGA-D6-6517-01A-11R-1873-07	UNC	HiSeq
ecDNA(-)	HNSC	TCGA-D6-6825-01	Primary Solid Tumor	TCGA-D6-6825-01A-21R-1915-07	UNC	HiSeq
ecDNA(-)	HNSC	TCGA-D6-6827-01	Primary Solid Tumor	TCGA-D6-6827-01A-11R-1915-07	UNC	HiSeq
ecDNA(-)	STAD	TCGA-D7-5577-01	Primary Solid Tumor	TCGA-D7-5577-01A-01R-1602-13	BCGSC	HiSeq
ecDNA(-)	STAD	TCGA-D7-6520-01	Primary Solid Tumor	TCGA-D7-6520-01A-11R-1802-13	BCGSC	HiSeq
ecDNA(-)	STAD	TCGA-D7-6522-01	Primary Solid Tumor	TCGA-D7-6522-01A-11R-1802-13	BCGSC	HiSeq
ecDNA(-)	STAD	TCGA-D7-6524-01	Primary Solid Tumor	TCGA-D7-6524-01A-11R-1802-13	BCGSC	HiSeq
ecDNA(-)	STAD	TCGA-D7-6525-01	Primary Solid Tumor	TCGA-D7-6525-01A-11R-1802-13	BCGSC	HiSeq
ecDNA(-)	STAD	TCGA-D7-6822-01	Primary Solid Tumor	TCGA-D7-6822-01A-11R-1884-13	BCGSC	HiSeq
ecDNA(-)	STAD	TCGA-D7-8570-01	Primary Solid Tumor	TCGA-D7-8570-01A-11R-2343-13	BCGSC	HiSeq
ecDNA(-)	BRCA	TCGA-D8-A27F-01	Primary Solid Tumor	TCGA-D8-A27F-01A-11R-A16F-07	UNC	HiSeq
ecDNA(-)	BRCA	TCGA-D8-A27H-01	Primary Solid Tumor	TCGA-D8-A27H-01A-11R-A16F-07	UNC	HiSeq
ecDNA(-)	LGG	TCGA-DB-5273-01	Primary Solid Tumor	TCGA-DB-5273-01A-01R-1470-07	UNC	HiSeq
ecDNA(-)	LGG	TCGA-DB-5276-01	Primary Solid Tumor	TCGA-DB-5276-01A-01R-1470-07	UNC	HiSeq
ecDNA(-)	LGG	TCGA-DB-5278-01	Primary Solid Tumor	TCGA-DB-5278-01A-01R-1470-07	UNC	HiSeq
ecDNA(-)	LGG	TCGA-DB-5279-01	Primary Solid Tumor	TCGA-DB-5279-01A-03R-2347-07	UNC	HiSeq
ecDNA(-)	LGG	TCGA-DB-5280-01	Primary Solid Tumor	TCGA-DB-5280-01A-01R-1470-07	UNC	HiSeq
ecDNA(-)	LGG	TCGA-DH-5143-01	Primary Solid Tumor	TCGA-DH-5143-01A-01R-1470-07	UNC	HiSeq
ecDNA(-)	LGG	TCGA-DH-A669-01	Primary Solid Tumor	TCGA-DH-A669-01A-12R-A31N-07	UNC	HiSeq
ecDNA(-)	UCEC	TCGA-DI-A1BU-01	Primary Solid Tumor	TCGA-DI-A1BU-01A-11R-A137-07	UNC	HiSeq
ecDNA(-)	UCEC	TCGA-DI-A1NN-01	Primary Solid Tumor	TCGA-DI-A1NN-01A-11R-A16F-07	UNC	GA
ecDNA(-)	BLCA	TCGA-DK-A1AA-01	Primary Solid Tumor	TCGA-DK-A1AA-01A-11R-A13Y-07	UNC	HiSeq
ecDNA(-)	BLCA	TCGA-DK-A1AB-01	Primary Solid Tumor	TCGA-DK-A1AB-01A-11R-A13Y-07	UNC	HiSeq
ecDNA(-)	BLCA	TCGA-DK-A1AE-01	Primary Solid Tumor	TCGA-DK-A1AE-01A-11R-A13Y-07	UNC	HiSeq
ecDNA(-)	BLCA	TCGA-DK-A1AG-01	Primary Solid Tumor	TCGA-DK-A1AG-01A-11R-A13Y-07	UNC	HiSeq
ecDNA(-)	BLCA	TCGA-DK-A2I1-01	Primary Solid Tumor	TCGA-DK-A2I1-01A-11R-A180-07	UNC	HiSeq
ecDNA(-)	BLCA	TCGA-DK-A3IL-01	Primary Solid Tumor	TCGA-DK-A3IL-01A-11R-A20F-07	UNC	HiSeq
ecDNA(-)	BLCA	TCGA-DK-A3IQ-01	Primary Solid Tumor	TCGA-DK-A3IQ-01A-31R-A32Y-07	UNC	HiSeq
ecDNA(-)	BLCA	TCGA-DK-A3IU-01	Primary Solid Tumor	TCGA-DK-A3IU-01A-11R-A20F-07	UNC	HiSeq
ecDNA(-)	BLCA	TCGA-DK-A3WY-01	Primary Solid Tumor	TCGA-DK-A3WY-01A-11R-A22U-07	UNC	HiSeq
ecDNA(-)	BLCA	TCGA-DK-A3X2-01	Primary Solid Tumor	TCGA-DK-A3X2-01A-11R-A22U-07	UNC	HiSeq
ecDNA(-)	HNSC	TCGA-DQ-5630-01	Primary Solid Tumor	TCGA-DQ-5630-01A-01R-1873-07	UNC	HiSeq
ecDNA(-)	HNSC	TCGA-DQ-5631-01	Primary Solid Tumor	TCGA-DQ-5631-01A-01R-1873-07	UNC	HiSeq
ecDNA(-)	LGG	TCGA-DU-5847-01	Primary Solid Tumor	TCGA-DU-5847-01A-11R-1708-07	UNC	HiSeq
ecDNA(-)	LGG	TCGA-DU-5849-01	Primary Solid Tumor	TCGA-DU-5849-01A-11R-1708-07	UNC	HiSeq
ecDNA(-)	LGG	TCGA-DU-5870-01	Primary Solid Tumor	TCGA-DU-5870-01A-11R-1708-07	UNC	HiSeq
ecDNA(-)	LGG	TCGA-DU-5872-01	Primary Solid Tumor	TCGA-DU-5872-01A-11R-1708-07	UNC	HiSeq
ecDNA(-)	LGG	TCGA-DU-5874-01	Primary Solid Tumor	TCGA-DU-5874-01A-11R-1708-07	UNC	HiSeq
ecDNA(-)	LGG	TCGA-DU-6392-01	Primary Solid Tumor	TCGA-DU-6392-01A-11R-1708-07	UNC	HiSeq
ecDNA(-)	LGG	TCGA-DU-6397-01	Primary Solid Tumor	TCGA-DU-6397-01A-11R-1708-07	UNC	HiSeq
ecDNA(-)	LGG	TCGA-DU-6399-01	Primary Solid Tumor	TCGA-DU-6399-01A-12R-1708-07	UNC	HiSeq
ecDNA(-)	LGG	TCGA-DU-6401-01	Primary Solid Tumor	TCGA-DU-6401-01A-11R-1708-07	UNC	HiSeq
ecDNA(-)	LGG	TCGA-DU-6402-01	Primary Solid Tumor	TCGA-DU-6402-01A-11R-1708-07	UNC	HiSeq
ecDNA(-)	LGG	TCGA-DU-6404-01	Primary Solid Tumor	TCGA-DU-6404-01A-11R-1708-07	UNC	HiSeq
ecDNA(-)	LGG	TCGA-DU-6407-01	Primary Solid Tumor	TCGA-DU-6407-01A-13R-1708-07	UNC	HiSeq
ecDNA(-)	LGG	TCGA-DU-6408-01	Primary Solid Tumor	TCGA-DU-6408-01A-11R-1708-07	UNC	HiSeq
ecDNA(-)	LGG	TCGA-DU-6542-01	Primary Solid Tumor	TCGA-DU-6542-01A-11R-1896-07	UNC	HiSeq
ecDNA(-)	LGG	TCGA-DU-7006-01	Primary Solid Tumor	TCGA-DU-7006-01A-11R-2027-07	UNC	HiSeq
ecDNA(-)	LGG	TCGA-DU-7008-01	Primary Solid Tumor	TCGA-DU-7008-01A-11R-2027-07	UNC	HiSeq
ecDNA(-)	LGG	TCGA-DU-7009-01	Primary Solid Tumor	TCGA-DU-7009-01A-11R-2027-07	UNC	HiSeq
ecDNA(-)	LGG	TCGA-DU-7018-01	Primary Solid Tumor	TCGA-DU-7018-01A-11R-2027-07	UNC	HiSeq
ecDNA(-)	LGG	TCGA-DU-7290-01	Primary Solid Tumor	TCGA-DU-7290-01A-11R-2027-07	UNC	HiSeq
ecDNA(-)	LGG	TCGA-DU-7294-01	Primary Solid Tumor	TCGA-DU-7294-01A-11R-2027-07	UNC	HiSeq
ecDNA(-)	LGG	TCGA-DU-7301-01	Primary Solid Tumor	TCGA-DU-7301-01A-11R-2090-07	UNC	HiSeq
ecDNA(-)	LGG	TCGA-DU-7304-01	Primary Solid Tumor	TCGA-DU-7304-01A-12R-2090-07	UNC	HiSeq
ecDNA(-)	SARC	TCGA-DX-A3U8-01	Primary Solid Tumor	TCGA-DX-A3U8-01A-11R-A29R-07	UNC	HiSeq
ecDNA(-)	SARC	TCGA-DX-A48U-01	Primary Solid Tumor	TCGA-DX-A48U-01A-11R-A30C-07	UNC	HiSeq
ecDNA(-)	SARC	TCGA-DX-A6Z2-01	Primary Solid Tumor	TCGA-DX-A6Z2-01A-12R-A36F-07	UNC	HiSeq
ecDNA(-)	LGG	TCGA-E1-5303-01	Primary Solid Tumor	TCGA-E1-5303-01A-01R-1470-07	UNC	HiSeq
ecDNA(-)	LGG	TCGA-E1-5305-01	Primary Solid Tumor	TCGA-E1-5305-01A-01R-1896-07	UNC	HiSeq
ecDNA(-)	LGG	TCGA-E1-5307-01	Primary Solid Tumor	TCGA-E1-5307-01A-01R-1896-07	UNC	HiSeq
ecDNA(-)	LGG	TCGA-E1-5318-01	Primary Solid Tumor	TCGA-E1-5318-01A-01R-1470-07	UNC	HiSeq
ecDNA(-)	LGG	TCGA-E1-5319-01	Primary Solid Tumor	TCGA-E1-5319-01A-01R-1896-07	UNC	HiSeq
ecDNA(-)	BRCA	TCGA-E2-A14P-01	Primary Solid Tumor	TCGA-E2-A14P-01A-31R-A12D-07	UNC	HiSeq
ecDNA(-)	BRCA	TCGA-E2-A156-01	Primary Solid Tumor	TCGA-E2-A156-01A-11R-A12D-07	UNC	HiSeq
ecDNA(-)	BLCA	TCGA-E5-A2PC-01	Primary Solid Tumor	TCGA-E5-A2PC-01A-11R-A206-07	UNC	HiSeq
ecDNA(-)	UCEC	TCGA-E6-A1LZ-01	Primary Solid Tumor	TCGA-E6-A1LZ-01A-11R-A144-07	UNC	GA
ecDNA(-)	BLCA	TCGA-E7-A3Y1-01	Primary Solid Tumor	TCGA-E7-A3Y1-01A-11R-A22U-07	UNC	HiSeq
ecDNA(-)	BRCA	TCGA-E9-A1NH-01	Primary Solid Tumor	TCGA-E9-A1NH-01A-11R-A14D-07	UNC	HiSeq
ecDNA(-)	CESC	TCGA-EA-A1QS-01	Primary Solid Tumor	TCGA-EA-A1QS-01A-61R-A22U-07	UNC	HiSeq
ecDNA(-)	CESC	TCGA-EA-A3HS-01	Primary Solid Tumor	TCGA-EA-A3HS-01A-11R-A213-07	UNC	HiSeq
ecDNA(-)	CESC	TCGA-EA-A3HT-01	Primary Solid Tumor	TCGA-EA-A3HT-01A-61R-A21T-07	UNC	HiSeq
ecDNA(-)	CESC	TCGA-EA-A3QE-01	Primary Solid Tumor	TCGA-EA-A3QE-01A-21R-A21T-07	UNC	HiSeq
ecDNA(-)	CESC	TCGA-EA-A3Y4-01	Primary Solid Tumor	TCGA-EA-A3Y4-01A-51R-A24H-07	UNC	HiSeq
ecDNA(-)	SKCM	TCGA-EB-A24D-01	Primary Solid Tumor	TCGA-EB-A24D-01A-11R-A18T-07	UNC	HiSeq
ecDNA(-)	SKCM	TCGA-EB-A299-01	Primary Solid Tumor	TCGA-EB-A299-01A-21R-A18U-07	UNC	HiSeq
ecDNA(-)	CESC	TCGA-EK-A2PK-01	Primary Solid Tumor	TCGA-EK-A2PK-01A-11R-A18M-07	UNC	HiSeq
ecDNA(-)	CESC	TCGA-EK-A2PL-01	Primary Solid Tumor	TCGA-EK-A2PL-01A-11R-A18M-07	UNC	HiSeq
ecDNA(-)	CESC	TCGA-EK-A2R7-01	Primary Solid Tumor	TCGA-EK-A2R7-01A-11R-A18M-07	UNC	HiSeq
ecDNA(-)	CESC	TCGA-EK-A2R8-01	Primary Solid Tumor	TCGA-EK-A2R8-01A-21R-A18M-07	UNC	HiSeq
ecDNA(-)	CESC	TCGA-EK-A2RE-01	Primary Solid Tumor	TCGA-EK-A2RE-01A-11R-A18M-07	UNC	HiSeq
ecDNA(-)	CESC	TCGA-EK-A2RL-01	Primary Solid Tumor	TCGA-EK-A2RL-01A-11R-A18M-07	UNC	HiSeq
ecDNA(-)	CESC	TCGA-EK-A2RN-01	Primary Solid Tumor	TCGA-EK-A2RN-01A-12R-A213-07	UNC	HiSeq
ecDNA(-)	CESC	TCGA-EK-A3GN-01	Primary Solid Tumor	TCGA-EK-A3GN-01A-11R-A213-07	UNC	HiSeq
ecDNA(-)	SKCM	TCGA-ER-A194-01	Primary Solid Tumor	TCGA-ER-A194-01A-11R-A18U-07	UNC	HiSeq
ecDNA(-)	SKCM	TCGA-ER-A19K-01	Primary Solid Tumor	TCGA-ER-A19K-01A-21R-A18T-07	UNC	HiSeq
ecDNA(-)	SKCM	TCGA-ER-A2NF-01	Primary Solid Tumor	TCGA-ER-A2NF-01A-11R-A18T-07	UNC	HiSeq
ecDNA(-)	BRCA	TCGA-EW-A1PB-01	Primary Solid Tumor	TCGA-EW-A1PB-01A-11R-A144-07	UNC	HiSeq
ecDNA(-)	CESC	TCGA-EX-A1H6-01	Primary Solid Tumor	TCGA-EX-A1H6-01B-11R-A22U-07	UNC	HiSeq
ecDNA(-)	UCEC	TCGA-EY-A1GW-01	Primary Solid Tumor	TCGA-EY-A1GW-01A-22R-A13S-07	UNC	GA
ecDNA(-)	LGG	TCGA-EZ-7264-01	Primary Solid Tumor	TCGA-EZ-7264-01A-11R-2027-07	UNC	HiSeq
ecDNA(-)	STAD	TCGA-F1-6177-01	Primary Solid Tumor	TCGA-F1-6177-01A-11R-1802-13	BCGSC	HiSeq
ecDNA(-)	STAD	TCGA-F1-6874-01	Primary Solid Tumor	TCGA-F1-6874-01A-11R-1884-13	BCGSC	HiSeq
ecDNA(-)	BLCA	TCGA-FD-A3B4-01	Primary Solid Tumor	TCGA-FD-A3B4-01A-12R-A206-07	UNC	HiSeq
ecDNA(-)	BLCA	TCGA-FD-A3B5-01	Primary Solid Tumor	TCGA-FD-A3B5-01A-11R-A20F-07	UNC	HiSeq
ecDNA(-)	BLCA	TCGA-FD-A3B8-01	Primary Solid Tumor	TCGA-FD-A3B8-01A-31R-A20F-07	UNC	HiSeq
ecDNA(-)	BLCA	TCGA-FD-A3SN-01	Primary Solid Tumor	TCGA-FD-A3SN-01A-12R-A22U-07	UNC	HiSeq
ecDNA(-)	BLCA	TCGA-FD-A3SQ-01	Primary Solid Tumor	TCGA-FD-A3SQ-01A-21R-A22U-07	UNC	HiSeq
ecDNA(-)	BLCA	TCGA-FD-A3SS-01	Primary Solid Tumor	TCGA-FD-A3SS-01A-12R-A22U-07	UNC	HiSeq
ecDNA(-)	LGG	TCGA-FG-5963-01	Primary Solid Tumor	TCGA-FG-5963-01A-11R-1708-07	UNC	HiSeq
ecDNA(-)	LGG	TCGA-FG-5964-01	Primary Solid Tumor	TCGA-FG-5964-01A-11R-1708-07	UNC	HiSeq
ecDNA(-)	LGG	TCGA-FG-5965-01	Primary Solid Tumor	TCGA-FG-5965-01B-11R-1896-07	UNC	HiSeq
ecDNA(-)	LGG	TCGA-FG-6689-01	Primary Solid Tumor	TCGA-FG-6689-01A-11R-1896-07	UNC	HiSeq
ecDNA(-)	LGG	TCGA-FG-6690-01	Primary Solid Tumor	TCGA-FG-6690-01A-11R-1896-07	UNC	HiSeq
ecDNA(-)	LGG	TCGA-FG-6691-01	Primary Solid Tumor	TCGA-FG-6691-01A-11R-1896-07	UNC	HiSeq
ecDNA(-)	LGG	TCGA-FG-7636-01	Primary Solid Tumor	TCGA-FG-7636-01A-11R-2090-07	UNC	HiSeq
ecDNA(-)	LGG	TCGA-FG-7643-01	Primary Solid Tumor	TCGA-FG-7643-01A-11R-2090-07	UNC	HiSeq
ecDNA(-)	LGG	TCGA-FG-8182-01	Primary Solid Tumor	TCGA-FG-8182-01A-11R-2256-07	UNC	HiSeq
ecDNA(-)	LGG	TCGA-FG-A4MT-01	Primary Solid Tumor	TCGA-FG-A4MT-01A-11R-A26U-07	UNC	HiSeq
ecDNA(-)	UCEC	TCGA-FI-A2D0-01	Primary Solid Tumor	TCGA-FI-A2D0-01A-11R-A17B-07	UNC	GA
ecDNA(-)	UCEC	TCGA-FI-A2D4-01	Primary Solid Tumor	TCGA-FI-A2D4-01A-12R-A17B-07	UNC	GA
ecDNA(-)	LGG	TCGA-FN-7833-01	Primary Solid Tumor	TCGA-FN-7833-01A-11R-2090-07	UNC	HiSeq
ecDNA(-)	STAD	TCGA-FP-7998-01	Primary Solid Tumor	TCGA-FP-7998-01A-11R-2203-13	BCGSC	HiSeq
ecDNA(-)	SKCM	TCGA-FS-A1ZN-01	Primary Solid Tumor	TCGA-FS-A1ZN-01A-11R-A18T-07	UNC	HiSeq
ecDNA(-)	CESC	TCGA-FU-A3EO-01	Primary Solid Tumor	TCGA-FU-A3EO-01A-11R-A213-07	UNC	HiSeq
ecDNA(-)	CESC	TCGA-FU-A3HY-01	Primary Solid Tumor	TCGA-FU-A3HY-01A-11R-A21T-07	UNC	HiSeq
ecDNA(-)	CESC	TCGA-FU-A3HZ-01	Primary Solid Tumor	TCGA-FU-A3HZ-01A-11R-A213-07	UNC	HiSeq
ecDNA(-)	CESC	TCGA-FU-A3NI-01	Primary Solid Tumor	TCGA-FU-A3NI-01A-11R-A21T-07	UNC	HiSeq
ecDNA(-)	CESC	TCGA-FU-A3TQ-01	Primary Solid Tumor	TCGA-FU-A3TQ-01A-11R-A22U-07	UNC	HiSeq
ecDNA(-)	CESC	TCGA-FU-A3TX-01	Primary Solid Tumor	TCGA-FU-A3TX-01A-11R-A22U-07	UNC	HiSeq
ecDNA(-)	CESC	TCGA-FU-A3WB-01	Primary Solid Tumor	TCGA-FU-A3WB-01A-11R-A22U-07	UNC	HiSeq
ecDNA(-)	CESC	TCGA-FU-A3YQ-01	Primary Solid Tumor	TCGA-FU-A3YQ-01A-11R-A22U-07	UNC	HiSeq
ecDNA(-)	SARC	TCGA-FX-A3NJ-01	Primary Solid Tumor	TCGA-FX-A3NJ-01A-11R-A21T-07	UNC	HiSeq
ecDNA(-)	SARC	TCGA-FX-A3RE-01	Primary Solid Tumor	TCGA-FX-A3RE-01A-11R-A22K-07	UNC	HiSeq
ecDNA(-)	SARC	TCGA-FX-A48G-01	Primary Solid Tumor	TCGA-FX-A48G-01A-11R-A24X-07	UNC	HiSeq
ecDNA(-)	BLCA	TCGA-G2-A2EJ-01	Primary Solid Tumor	TCGA-G2-A2EJ-01A-11R-A180-07	UNC	HiSeq
ecDNA(-)	BLCA	TCGA-G2-A2EL-01	Primary Solid Tumor	TCGA-G2-A2EL-01A-12R-A18C-07	UNC	HiSeq
ecDNA(-)	BLCA	TCGA-G2-A2ES-01	Primary Solid Tumor	TCGA-G2-A2ES-01A-11R-A180-07	UNC	HiSeq
ecDNA(-)	BLCA	TCGA-G2-A3IB-01	Primary Solid Tumor	TCGA-G2-A3IB-01A-11R-A20F-07	UNC	HiSeq
ecDNA(-)	BLCA	TCGA-GC-A3I6-01	Primary Solid Tumor	TCGA-GC-A3I6-01A-11R-A20F-07	UNC	HiSeq
ecDNA(-)	BLCA	TCGA-GC-A3OO-01	Primary Solid Tumor	TCGA-GC-A3OO-01A-11R-A22U-07	UNC	HiSeq
ecDNA(-)	BLCA	TCGA-GC-A3WC-01	Primary Solid Tumor	TCGA-GC-A3WC-01A-31R-A22U-07	UNC	HiSeq
ecDNA(-)	BLCA	TCGA-GD-A3OP-01	Primary Solid Tumor	TCGA-GD-A3OP-01A-21R-A220-07	UNC	HiSeq
ecDNA(-)	BLCA	TCGA-GD-A3OQ-01	Primary Solid Tumor	TCGA-GD-A3OQ-01A-32R-A220-07	UNC	HiSeq
ecDNA(-)	BRCA	TCGA-GI-A2C9-01	Primary Solid Tumor	TCGA-GI-A2C9-01A-11R-A21T-07	UNC	HiSeq
ecDNA(-)	BRCA	TCGA-GM-A3XL-01	Primary Solid Tumor	TCGA-GM-A3XL-01A-11R-A22U-07	UNC	HiSeq
ecDNA(-)	SKCM	TCGA-GN-A26C-01	Primary Solid Tumor	TCGA-GN-A26C-01A-11R-A18T-07	UNC	HiSeq
ecDNA(-)	BLCA	TCGA-GV-A3QG-01	Primary Solid Tumor	TCGA-GV-A3QG-01A-11R-A220-07	UNC	HiSeq
ecDNA(-)	HNSC	TCGA-H7-7774-01	Primary Solid Tumor	TCGA-H7-7774-01A-21R-2081-07	UNC	HiSeq
ecDNA(-)	SARC	TCGA-HB-A43Z-01	Primary Solid Tumor	TCGA-HB-A43Z-01A-11R-A24X-07	UNC	HiSeq
ecDNA(-)	SARC	TCGA-HB-A5W3-01	Primary Solid Tumor	TCGA-HB-A5W3-01A-11R-A29R-07	UNC	HiSeq
ecDNA(-)	HNSC	TCGA-HD-7753-01	Primary Solid Tumor	TCGA-HD-7753-01A-11R-2081-07	UNC	HiSeq
ecDNA(-)	STAD	TCGA-HF-7136-01	Primary Solid Tumor	TCGA-HF-7136-01A-11R-2055-13	BCGSC	HiSeq
ecDNA(-)	CESC	TCGA-HM-A3JK-01	Primary Solid Tumor	TCGA-HM-A3JK-01A-11R-A32Y-07	UNC	HiSeq
ecDNA(-)	LGG	TCGA-HT-7468-01	Primary Solid Tumor	TCGA-HT-7468-01A-11R-2027-07	UNC	HiSeq
ecDNA(-)	LGG	TCGA-HT-7472-01	Primary Solid Tumor	TCGA-HT-7472-01A-11R-2027-07	UNC	HiSeq
ecDNA(-)	LGG	TCGA-HT-7473-01	Primary Solid Tumor	TCGA-HT-7473-01A-11R-2027-07	UNC	HiSeq
ecDNA(-)	LGG	TCGA-HT-7476-01	Primary Solid Tumor	TCGA-HT-7476-01A-11R-2027-07	UNC	HiSeq
ecDNA(-)	LGG	TCGA-HT-7481-01	Primary Solid Tumor	TCGA-HT-7481-01A-11R-2027-07	UNC	HiSeq
ecDNA(-)	LGG	TCGA-HT-7601-01	Primary Solid Tumor	TCGA-HT-7601-01A-11R-2090-07	UNC	HiSeq
ecDNA(-)	LGG	TCGA-HT-7602-01	Primary Solid Tumor	TCGA-HT-7602-01A-21R-2090-07	UNC	HiSeq
ecDNA(-)	LGG	TCGA-HT-7689-01	Primary Solid Tumor	TCGA-HT-7689-01A-11R-2256-07	UNC	HiSeq
ecDNA(-)	LGG	TCGA-HT-7695-01	Primary Solid Tumor	TCGA-HT-7695-01A-11R-2256-07	UNC	HiSeq
ecDNA(-)	STAD	TCGA-HU-8608-01	Primary Solid Tumor	TCGA-HU-8608-01A-11R-2402-13	BCGSC	HiSeq
ecDNA(-)	STAD	TCGA-HU-A4H0-01	Primary Solid Tumor	TCGA-HU-A4H0-01A-11R-A251-31	BCGSC	HiSeq
ecDNA(-)	LGG	TCGA-HW-7486-01	Primary Solid Tumor	TCGA-HW-7486-01A-11R-2027-07	UNC	HiSeq
ecDNA(-)	LGG	TCGA-HW-7487-01	Primary Solid Tumor	TCGA-HW-7487-01A-11R-2027-07	UNC	HiSeq
ecDNA(-)	LGG	TCGA-HW-7489-01	Primary Solid Tumor	TCGA-HW-7489-01A-11R-2027-07	UNC	HiSeq
ecDNA(-)	LGG	TCGA-HW-7495-01	Primary Solid Tumor	TCGA-HW-7495-01A-11R-2027-07	UNC	HiSeq
ecDNA(-)	SARC	TCGA-IE-A4EI-01	Primary Solid Tumor	TCGA-IE-A4EI-01A-11R-A24X-07	UNC	HiSeq
ecDNA(-)	SARC	TCGA-IE-A4EK-01	Primary Solid Tumor	TCGA-IE-A4EK-01A-11R-A24X-07	UNC	HiSeq
ecDNA(-)	SARC	TCGA-IF-A4AJ-01	Primary Solid Tumor	TCGA-IF-A4AJ-01A-11R-A24X-07	UNC	HiSeq
ecDNA(-)	ESCA	TCGA-IG-A3QL-01	Primary Solid Tumor	TCGA-IG-A3QL-01A-11R-A24K-31	BCGSC	HiSeq
ecDNA(-)	ESCA	TCGA-IG-A3Y9-01	Primary Solid Tumor	TCGA-IG-A3Y9-01A-12R-A24K-31	BCGSC	HiSeq
ecDNA(-)	ESCA	TCGA-IG-A3YA-01	Primary Solid Tumor	TCGA-IG-A3YA-01A-11R-A24K-31	BCGSC	HiSeq
ecDNA(-)	ESCA	TCGA-IG-A4P3-01	Primary Solid Tumor	TCGA-IG-A4P3-01A-11R-A260-31	BCGSC	HiSeq
ecDNA(-)	ESCA	TCGA-IG-A4QT-01	Primary Solid Tumor	TCGA-IG-A4QT-01A-21R-A260-31	BCGSC	HiSeq
ecDNA(-)	ESCA	TCGA-IG-A5B8-01	Primary Solid Tumor	TCGA-IG-A5B8-01A-11R-A28J-31	BCGSC	HiSeq
ecDNA(-)	STAD	TCGA-IN-7806-01	Primary Solid Tumor	TCGA-IN-7806-01A-11R-2055-13	BCGSC	HiSeq
ecDNA(-)	CESC	TCGA-IR-A3L7-01	Primary Solid Tumor	TCGA-IR-A3L7-01A-21R-A213-07	UNC	HiSeq
ecDNA(-)	CESC	TCGA-IR-A3LC-01	Primary Solid Tumor	TCGA-IR-A3LC-01A-11R-A213-07	UNC	HiSeq
ecDNA(-)	CESC	TCGA-IR-A3LF-01	Primary Solid Tumor	TCGA-IR-A3LF-01A-21R-A22U-07	UNC	HiSeq
ecDNA(-)	CESC	TCGA-IR-A3LL-01	Primary Solid Tumor	TCGA-IR-A3LL-01A-11R-A213-07	UNC	HiSeq
ecDNA(-)	SARC	TCGA-IS-A3K7-01	Primary Solid Tumor	TCGA-IS-A3K7-01A-11R-A21T-07	UNC	HiSeq
ecDNA(-)	SARC	TCGA-IW-A3M4-01	Primary Solid Tumor	TCGA-IW-A3M4-01A-11R-A21T-07	UNC	HiSeq
ecDNA(-)	SARC	TCGA-IW-A3M5-01	Primary Solid Tumor	TCGA-IW-A3M5-01A-22R-A21T-07	UNC	HiSeq
ecDNA(-)	CESC	TCGA-JX-A3Q0-01	Primary Solid Tumor	TCGA-JX-A3Q0-01A-11R-A32Y-07	UNC	HiSeq
ecDNA(-)	CESC	TCGA-JX-A3Q8-01	Primary Solid Tumor	TCGA-JX-A3Q8-01A-11R-A21T-07	UNC	HiSeq
ecDNA(-)	ESCA	TCGA-JY-A93C-01	Primary Solid Tumor	TCGA-JY-A93C-01A-11R-A38D-31	BCGSC	HiSeq
ecDNA(-)	BLCA	TCGA-K4-A3WS-01	Primary Solid Tumor	TCGA-K4-A3WS-01A-11R-A22U-07	UNC	HiSeq
ecDNA(-)	ESCA	TCGA-L5-A43E-01	Primary Solid Tumor	TCGA-L5-A43E-01A-11R-A24K-31	BCGSC	HiSeq
ecDNA(-)	ESCA	TCGA-L5-A43H-01	Primary Solid Tumor	TCGA-L5-A43H-01A-11R-A24K-31	BCGSC	HiSeq
ecDNA(-)	ESCA	TCGA-L5-A43J-01	Primary Solid Tumor	TCGA-L5-A43J-01A-12R-A24K-31	BCGSC	HiSeq
ecDNA(-)	ESCA	TCGA-L5-A4OE-01	Primary Solid Tumor	TCGA-L5-A4OE-01A-11R-A260-31	BCGSC	HiSeq
ecDNA(-)	ESCA	TCGA-L5-A4OF-01	Primary Solid Tumor	TCGA-L5-A4OF-01A-11R-A260-31	BCGSC	HiSeq
ecDNA(-)	ESCA	TCGA-L5-A4OI-01	Primary Solid Tumor	TCGA-L5-A4OI-01A-11R-A36D-31	BCGSC	HiSeq
ecDNA(-)	ESCA	TCGA-L5-A4OP-01	Primary Solid Tumor	TCGA-L5-A4OP-01A-11R-A260-31	BCGSC	HiSeq
ecDNA(-)	ESCA	TCGA-L5-A4OS-01	Primary Solid Tumor	TCGA-L5-A4OS-01A-11R-A28J-31	BCGSC	HiSeq
ecDNA(-)	ESCA	TCGA-LN-A49N-01	Primary Solid Tumor	TCGA-LN-A49N-01A-11R-A24K-31	BCGSC	HiSeq
ecDNA(-)	ESCA	TCGA-LN-A49O-01	Primary Solid Tumor	TCGA-LN-A49O-01A-11R-A24K-31	BCGSC	HiSeq
ecDNA(-)	ESCA	TCGA-LN-A49S-01	Primary Solid Tumor	TCGA-LN-A49S-01A-11R-A24K-31	BCGSC	HiSeq
ecDNA(-)	ESCA	TCGA-LN-A49U-01	Primary Solid Tumor	TCGA-LN-A49U-01A-31R-A260-31	BCGSC	HiSeq
ecDNA(-)	ESCA	TCGA-LN-A4A2-01	Primary Solid Tumor	TCGA-LN-A4A2-01A-31R-A260-31	BCGSC	HiSeq
ecDNA(-)	ESCA	TCGA-LN-A4A6-01	Primary Solid Tumor	TCGA-LN-A4A6-01A-11R-A260-31	BCGSC	HiSeq
ecDNA(-)	ESCA	TCGA-LN-A4MQ-01	Primary Solid Tumor	TCGA-LN-A4MQ-01A-11R-A28J-31	BCGSC	HiSeq
ecDNA(-)	ESCA	TCGA-LN-A4MR-01	Primary Solid Tumor	TCGA-LN-A4MR-01A-11R-A28J-31	BCGSC	HiSeq
ecDNA(-)	SARC	TCGA-MO-A47R-01	Primary Solid Tumor	TCGA-MO-A47R-01A-11R-A24X-07	UNC	HiSeq
ecDNA(-)	LGG	TCGA-TM-A7CF-01	Primary Solid Tumor	TCGA-TM-A7CF-01A-11R-A32Q-07	UNC	HiSeq
ecDNA(-)	LGG	TCGA-TQ-A7RK-01	Primary Solid Tumor	TCGA-TQ-A7RK-01A-11R-A33Z-07	UNC	HiSeq
ecDNA(-)	LGG	TCGA-TQ-A7RV-01	Primary Solid Tumor	TCGA-TQ-A7RV-01A-21R-A34F-07	UNC	HiSeq
ecDNA(-)	LGG	TCGA-TQ-A8XE-01	Primary Solid Tumor	TCGA-TQ-A8XE-01A-11R-A36H-07	UNC	HiSeq

## Sheet: 1C
Cluster#	trial_count_by_cluster	au	#CorEx_genes	#Boruta_genes	#Core_genes	CorEx_genes	Boruta_genes	Core_genes
1	16	0.974168	26	1	1	AP1M2|10053;C1orf172|126695;C1orf210|149466;C20orf151|140893;CBLC|23624;CCDC64B|146439;CHMP4C|92421;CLDN4|1364;CLDN7|1366;CNKSR1|10256;CRB3|92359;ELF3|1999;ELMO3|79767;ESRP2|80004;GRB7|2886;GRHL2|79977;LSR|51599;OVOL2|58495;PRRG2|5639;PRSS22|64063;PRSS8|5652;RAB25|57111;SCNN1A|6337;SPINT2|10653;ST14|6768;TMEM184A|202915	GRB7|2886	GRB7|2886
2	200	0.976688	21	15	14	C8orf41|80185;CCDC25|55246;CNOT7|29883;ERI1|90459;ERICH1|157697;FBXO25|26260;FDFT1|2222;FUT10|84750;INTS10|55174;MAK16|84549;MCPH1|79648;PCM1|5108;PINX1|54984;POLR3D|661;PPP2R2A|5520;TRIM35|23087;UBXN8|7993;VPS37A|137492;WRN|7486;XPO7|23039;ZNF395|55893	C8orf41|80185;CCDC25|55246;CNOT7|29883;FBXO25|26260;FDFT1|2222;FUT10|84750;INTS10|55174;MCPH1|79648;PCM1|5108;PPP2R2A|5520;TRIM35|23087;VPS37A|137492;WRN|7486;XPO7|23039;ZNF395|55893	C8orf41|80185;CCDC25|55246;CNOT7|29883;FDFT1|2222;FUT10|84750;INTS10|55174;MCPH1|79648;PCM1|5108;PPP2R2A|5520;TRIM35|23087;VPS37A|137492;WRN|7486;XPO7|23039;ZNF395|55893
3	200	0.979347	21	13	9	AURKA|6790;BUB1|699;CDC20|991;CDC45|8318;CDC6|990;CDCA5|113130;CDCA8|55143;FOXM1|2305;GSG2|83903;KIF2C|11004;KIF4A|24137;KPNA2|3838;MCM10|55388;NCAPH|23397;ORC1L|4998;PLK1|5347;RAD51|5888;RAD54L|8438;SPAG5|10615;TPX2|22974;TRIP13|9319	AURKA|6790;BUB1|699;CDCA5|113130;GSG2|83903;KIF2C|11004;KIF4A|24137;NCAPH|23397;PLK1|5347;RAD51|5888;RAD54L|8438;SPAG5|10615;TPX2|22974;TRIP13|9319	AURKA|6790;BUB1|699;CDCA5|113130;GSG2|83903;KIF2C|11004;KIF4A|24137;SPAG5|10615;TPX2|22974;TRIP13|9319
4	19	0.957647	14	3	1	C1orf192|257177;C1orf194|127003;C1orf230|284485;C6orf118|168090;C9orf171|389799;CCDC135|84229;FRMPD2|143162;KIAA1751|85452;MORN5|254956;RSPH4A|345895;RTDR1|27156;VWA3A|146177;YSK4|80122;ZBBX|79740	FRMPD2|143162;MORN5|254956;ZBBX|79740	MORN5|254956
5	111	0.975984	12	5	5	APOBEC4|403314;C11orf16|56673;C20orf85|128602;CCDC17|149483;CDHR4|389118;DCDC2B|149069;LDLRAD1|388633;SNTN|132203;TCTEX1D4|343521;TMEM190|147744;TTLL10|254173;TUBA4B|80086	C11orf16|56673;C20orf85|128602;CDHR4|389118;LDLRAD1|388633;SNTN|132203	C11orf16|56673;C20orf85|128602;CDHR4|389118;LDLRAD1|388633;SNTN|132203
6	23	0.953709	12	1	1	CD163|9332;CPVL|54504;FCGR2A|2212;FCGR3A|2214;FOLR2|2350;MPP1|4354;MS4A4A|51338;MS4A6A|64231;MS4A7|58475;MSR1|4481;SIGLEC1|6614;TMEM106A|113277	CPVL|54504	CPVL|54504
7	21	0.953937	10	1	1	C10orf99|387695;C9orf169|375791;CNFN|84518;GLTP|51228;KCTD11|147040;NCCRP1|342897;PRSS27|83886;RNF222|643904;SLC39A2|29986;TMEM79|84283	PRSS27|83886	PRSS27|83886
8	117	0.974681	9	2	2	BRD9|65980;CCDC127|133957;EXOC3|11336;MED10|84246;MRPL36|64979;NDUFS6|4726;PDCD6|10016;SDHA|6389;ZNF622|90441	MED10|84246;MRPL36|64979	MED10|84246;MRPL36|64979
9	32	0.96548	9	1	1	ALOX12B|242;ALOXE3|59344;DSG1|1828;KRT10|3858;KRT1|3848;PLA2G4D|283748;PNPLA1|285848;SBSN|374897;THEM5|284486	KRT10|3858	KRT10|3858
10	11	0.97673	9	1	1	CSDE1|7812;CTTNBP2NL|55917;DR1|1810;GNAI3|2773;HIAT1|64645;NRAS|4893;RBMXL1|494115;SIKE1|80143;ZNHIT6|54680	SIKE1|80143	SIKE1|80143
11	144	1	7	7	5	HOXC10|3226;HOXC11|3227;HOXC4|3221;HOXC5|3222;HOXC6|3223;HOXC8|3224;HOXC9|3225	HOXC10|3226;HOXC11|3227;HOXC4|3221;HOXC5|3222;HOXC6|3223;HOXC8|3224;HOXC9|3225	HOXC4|3221;HOXC5|3222;HOXC6|3223;HOXC8|3224;HOXC9|3225
12	88	0.970631	7	3	2	BCL2L15|440603;CFTR|1080;DMBT1|1755;MS4A8B|83661;PIGR|5284;SLC6A20|54716;ST6GALNAC1|55808	BCL2L15|440603;PIGR|5284;ST6GALNAC1|55808	PIGR|5284;ST6GALNAC1|55808
13	41	0.961616	7	2	2	CLNK|116449;FLT3|2322;IL12B|3593;KIAA0748|9840;STAT4|6775;THEMIS|387357;ZNF831|128611	CLNK|116449;THEMIS|387357	CLNK|116449;THEMIS|387357
14	19	0.959917	7	1	1	ACTL8|81569;GAL|51083;HORMAD1|84072;MTHFD2|10797;OLAH|55301;SLC4A5|57835;TEX19|400629	GAL|51083	GAL|51083
15	11	0.98537	7	2	0	C10orf125|282969;CYBA|1535;GMIP|51291;INSL3|3640;LIME1|54923;PBX4|80714;PSMB10|5699	CYBA|1535;PSMB10|5699
16	11	0.960444	7	3	0	CCR2|729230;CD40LG|959;CD48|962;CD52|1043;KLRB1|3820;LY9|4063;SLAMF7|57823	CD40LG|959;CD52|1043;KLRB1|3820
17	195	0.964382	6	6	6	HOXA2|3199;HOXA3|3200;HOXA4|3201;HOXA5|3202;HOXA6|3203;HOXA7|3204	HOXA2|3199;HOXA3|3200;HOXA4|3201;HOXA5|3202;HOXA6|3203;HOXA7|3204	HOXA2|3199;HOXA3|3200;HOXA4|3201;HOXA5|3202;HOXA6|3203;HOXA7|3204
18	35	0.963372	6	2	2	CXCL17|284340;FUT3|2525;FUT6|2528;GPR110|266977;MUC20|200958;MUC4|4585	CXCL17|284340;FUT6|2528	CXCL17|284340;FUT6|2528
19	12	0.961491	6	1	1	METTL5|29081;MITD1|129531;SNRPA1|6627;SNRPD1|6632;SNRPG|6637;TPRKB|51002	SNRPD1|6632	SNRPD1|6632
20	130	0.97271	5	3	3	C6orf97|80129;CLIC5|53405;DACH1|1602;RAI2|10742;SLC40A1|30061	C6orf97|80129;CLIC5|53405;RAI2|10742	C6orf97|80129;CLIC5|53405;RAI2|10742
21	26	0.958737	5	1	1	ASMT|438;C20orf106|200232;C20orf107|388799;CUZD1|50624;FAM24B|196792	C20orf107|388799	C20orf107|388799
22	177	0.991903	4	2	2	CTTN|2017;FADD|8772;ORAOV1|220064;PPFIA1|8500	ORAOV1|220064;PPFIA1|8500	ORAOV1|220064;PPFIA1|8500
23	71	0.955434	4	2	1	C2orf74|339804;EPM2AIP1|9852;MLH1|4292;ZNF311|282890	EPM2AIP1|9852;MLH1|4292	MLH1|4292
24	50	0.958577	4	3	1	ATAD2|29028;DSCC1|79075;MTBP|27085;WDR67|93594	ATAD2|29028;MTBP|27085;WDR67|93594	WDR67|93594
25	41	0.959074	4	1	1	DUSP6|1848;ETV4|2118;SPRED2|200734;SPRY4|81848	SPRED2|200734	SPRED2|200734
26	30	0.958049	4	1	1	FUT2|2524;LCN2|3934;PDZK1IP1|10158;SLPI|6590	SLPI|6590	SLPI|6590
27	200	0.992432	4	1	1	CCT6A|908;CHCHD2|51142;MRPS17|51373;SEC61G|23480	SEC61G|23480	SEC61G|23480
28	19	0.999104	4	1	1	HMGA2|8091;IGF2BP1|10642;IGF2BP2|10644;IGF2BP3|10643	IGF2BP3|10643	IGF2BP3|10643
29	133	0.954815	4	1	1	CDK1|983;NEK2|4751;NUF2|83540;TTK|7272	NUF2|83540	NUF2|83540
30	10	0.991326	4	2	1	C7orf42|55069;CRCP|27297;TYW1|55253;VKORC1L1|154807	C7orf42|55069;VKORC1L1|154807	C7orf42|55069
31	200	0.96038	3	3	3	CDK4|1019;METTL1|4234;TSFM|10102	CDK4|1019;METTL1|4234;TSFM|10102	CDK4|1019;METTL1|4234;TSFM|10102
32	184	0.955858	3	3	3	HOXA10|3206;HOXA11|3207;HOXA9|3205	HOXA10|3206;HOXA11|3207;HOXA9|3205	HOXA10|3206;HOXA11|3207;HOXA9|3205
33	181	0.958569	3	3	2	CTDSP2|10106;FAM119B|25895;OS9|10956	CTDSP2|10106;FAM119B|25895;OS9|10956	FAM119B|25895;OS9|10956
34	116	0.983946	3	2	2	CD2|914;CD3D|915;CD3E|916	CD2|914;CD3E|916	CD2|914;CD3E|916
35	79	0.982349	3	2	1	ERAL1|26284;POLDIP2|26073;TMEM199|147007	ERAL1|26284;TMEM199|147007	ERAL1|26284
36	65	0.987018	3	2	1	C20orf27|54976;IDH3B|3420;NOP56|10528	C20orf27|54976;NOP56|10528	NOP56|10528
37	21	0.994548	3	1	1	DPAGT1|1798;SRPR|6734;STT3A|3703	SRPR|6734	SRPR|6734
38	21	0.976593	3	1	1	AKR1A1|10327;CIB1|10519;GCHFR|2644	GCHFR|2644	GCHFR|2644
39	20	0.973498	3	3	1	CCR5|1234;ITGAL|3683;SPN|6693	CCR5|1234;ITGAL|3683;SPN|6693	SPN|6693
40	19	0.997795	3	1	1	BET1|10282;C7orf23|79161;GATAD1|57798	BET1|10282	BET1|10282
41	19	0.958427	3	1	1	C17orf72|92340;C2orf39|92749;FAM81B|153643	FAM81B|153643	FAM81B|153643
42	180	0.956361	3	1	1	NPEPL1|79716;RTEL1|51750;UCKL1|54963	UCKL1|54963	UCKL1|54963
43	17	1	3	1	1	ASPM|259266;CENPF|1063;KIF14|9928	ASPM|259266	ASPM|259266
44	160	0.985255	3	2	1	KIAA1797|54914;KLHL9|55958;MLLT3|4300	KIAA1797|54914;MLLT3|4300	MLLT3|4300
45	159	0.955157	3	2	1	MCM6|4175;TCF19|6941;WDR76|79968	MCM6|4175;TCF19|6941	TCF19|6941
46	78	0.970186	2	2	2	CD3G|917;P2RY10|27334	CD3G|917;P2RY10|27334	CD3G|917;P2RY10|27334
47	200	1	2	2	2	FAM72B|653820;FAM72D|728833	FAM72B|653820;FAM72D|728833	FAM72B|653820;FAM72D|728833
48	200	0.986272	2	2	2	INTS9|55756;KIAA1967|57805	INTS9|55756;KIAA1967|57805	INTS9|55756;KIAA1967|57805
49	196	0.997124	2	2	2	C20orf20|55257;PSMA7|5688	C20orf20|55257;PSMA7|5688	C20orf20|55257;PSMA7|5688
50	194	0.996022	2	2	2	MDM2|4193;SLC35E3|55508	MDM2|4193;SLC35E3|55508	MDM2|4193;SLC35E3|55508
51	190	0.953771	2	2	2	MARCH9|92979;TSPAN31|6302	MARCH9|92979;TSPAN31|6302	MARCH9|92979;TSPAN31|6302
52	185	0.999094	2	2	2	CCT2|10576;YEATS4|8089	CCT2|10576;YEATS4|8089	CCT2|10576;YEATS4|8089
53	125	0.951736	2	2	2	GTF2E2|2961;KCTD9|54793	GTF2E2|2961;KCTD9|54793	GTF2E2|2961;KCTD9|54793
54	122	0.965767	2	2	2	CENPN|55839;SHCBP1|79801	CENPN|55839;SHCBP1|79801	CENPN|55839;SHCBP1|79801
55	93	0.992632	2	1	1	CBX7|23492;EZH1|2145	CBX7|23492	CBX7|23492
56	91	0.993173	2	1	1	KDELR2|11014;KDELR3|11015	KDELR2|11014	KDELR2|11014
57	88	1	2	2	1	MIPOL1|145282;SLC25A21|89874	MIPOL1|145282;SLC25A21|89874	MIPOL1|145282
58	85	0.999085	2	1	1	DPM1|8813;SLMO2|51012	DPM1|8813	DPM1|8813
59	73	0.985536	2	1	1	EPB49|2039;NPM2|10361	EPB49|2039	EPB49|2039
60	67	0.983894	2	1	1	BIN3|55909;C8orf58|541565	BIN3|55909	BIN3|55909
61	62	1	2	2	1	C12orf74|338809;PLEKHG7|440107	C12orf74|338809;PLEKHG7|440107	PLEKHG7|440107
62	55	0.986897	2	2	1	BLM|641;CENPO|79172	BLM|641;CENPO|79172	BLM|641
63	49	1	2	1	1	CARD16|114769;CASP1|834	CASP1|834	CASP1|834
64	47	0.998075	2	1	1	MRPS27|23107;PTCD2|79810	MRPS27|23107	MRPS27|23107
65	47	0.984052	2	1	1	C4orf21|55345;CCDC150|284992	CCDC150|284992	CCDC150|284992
66	45	0.985768	2	1	1	PPP5C|5536;SAE1|10055	SAE1|10055	SAE1|10055
67	40	1	2	2	1	C10orf114|399726;C10orf140|387640	C10orf114|399726;C10orf140|387640	C10orf114|399726
68	39	1	2	1	1	ABCF1|23;DHX16|8449	ABCF1|23	ABCF1|23
69	35	1	2	2	1	C5orf20|140947;TIFAB|497189	C5orf20|140947;TIFAB|497189	TIFAB|497189
70	31	0.997473	2	1	1	MON1B|22879;WWP2|11060	MON1B|22879	MON1B|22879
71	24	0.952232	2	1	1	BCR|613;DGCR2|9993	BCR|613	BCR|613
72	23	1	2	1	1	CCDC152|100129792;SEPP1|6414	CCDC152|100129792	CCDC152|100129792
73	23	0.966957	2	2	1	CNOT2|4848;FRS2|10818	CNOT2|4848;FRS2|10818	FRS2|10818
74	200	0.973703	2	1	1	CSTF1|1477;RAE1|8480	RAE1|8480	RAE1|8480
75	183	0.961159	2	2	1	NCAPG|64151;NDC80|10403	NCAPG|64151;NDC80|10403	NCAPG|64151
76	18	0.997967	2	2	1	PSRC1|84722;STMN1|3925	PSRC1|84722;STMN1|3925	PSRC1|84722
77	170	0.973198	2	1	1	PCDH7|5099;PLEKHA2|59339	PCDH7|5099	PCDH7|5099
78	15	0.950474	2	1	1	SERPINB1|1992;SQRDL|58472	SERPINB1|1992	SERPINB1|1992
79	13	0.997643	2	1	1	NRM|11270;TUBB|203068	TUBB|203068	TUBB|203068
80	121	1	2	2	1	C1orf112|55732;CENPL|91687	C1orf112|55732;CENPL|91687	CENPL|91687
81	117	1	2	1	1	DIDO1|11083;TAF4|6874	TAF4|6874	TAF4|6874
82	115	0.971421	2	1	1	CCR4|1233;CCR8|1237	CCR4|1233	CCR4|1233
83	11	0.995924	2	1	1	IFT20|90410;SDF2|6388	SDF2|6388	SDF2|6388
84	11	0.966255	2	1	1	EPHB2|2048;LIPG|9388	EPHB2|2048	EPHB2|2048
85	10	0.999192	2	1	1	DEK|7913;USP1|7398	USP1|7398	USP1|7398
86	95	DDIT3|1649	1	1	1	DDIT3|1649	DDIT3|1649	DDIT3|1649
87	92	C5orf33|133686	1	1	1	C5orf33|133686	C5orf33|133686	C5orf33|133686
88	91	FAF1|11124	1	1	1	FAF1|11124	FAF1|11124	FAF1|11124
89	90	ZNF385B|151126	1	1	1	ZNF385B|151126	ZNF385B|151126	ZNF385B|151126
90	90	UBE2C|11065	1	1	1	UBE2C|11065	UBE2C|11065	UBE2C|11065
91	89	C17orf37|84299	1	1	1	C17orf37|84299	C17orf37|84299	C17orf37|84299
92	86	C5orf34|375444	1	1	1	C5orf34|375444	C5orf34|375444	C5orf34|375444
93	86	ACAP1|9744	1	1	1	ACAP1|9744	ACAP1|9744	ACAP1|9744
94	85	UBASH3A|53347	1	1	1	UBASH3A|53347	UBASH3A|53347	UBASH3A|53347
95	85	MPV17L|255027	1	1	1	MPV17L|255027	MPV17L|255027	MPV17L|255027
96	85	CTNNBL1|56259	1	1	1	CTNNBL1|56259	CTNNBL1|56259	CTNNBL1|56259
97	84	MUC16|94025	1	1	1	MUC16|94025	MUC16|94025	MUC16|94025
98	83	NAT1|9	1	1	1	NAT1|9	NAT1|9	NAT1|9
99	83	LTB|4050	1	1	1	LTB|4050	LTB|4050	LTB|4050
100	83	IGDCC4|57722	1	1	1	IGDCC4|57722	IGDCC4|57722	IGDCC4|57722
101	82	TRIM8|81603	1	1	1	TRIM8|81603	TRIM8|81603	TRIM8|81603
102	78	CKAP2L|150468	1	1	1	CKAP2L|150468	CKAP2L|150468	CKAP2L|150468
103	76	IPCEF1|26034	1	1	1	IPCEF1|26034	IPCEF1|26034	IPCEF1|26034
104	75	FTSJ2|29960	1	1	1	FTSJ2|29960	FTSJ2|29960	FTSJ2|29960
105	75	C20orf111|51526	1	1	1	C20orf111|51526	C20orf111|51526	C20orf111|51526
106	74	RPL3|6122	1	1	1	RPL3|6122	RPL3|6122	RPL3|6122
107	74	PNPT1|87178	1	1	1	PNPT1|87178	PNPT1|87178	PNPT1|87178
108	74	CYP4X1|260293	1	1	1	CYP4X1|260293	CYP4X1|260293	CYP4X1|260293
109	74	CKS1B|1163	1	1	1	CKS1B|1163	CKS1B|1163	CKS1B|1163
110	70	MAD2L2|10459	1	1	1	MAD2L2|10459	MAD2L2|10459	MAD2L2|10459
111	68	DEPDC1|55635	1	1	1	DEPDC1|55635	DEPDC1|55635	DEPDC1|55635
112	66	PCMT1|5110	1	1	1	PCMT1|5110	PCMT1|5110	PCMT1|5110
113	65	PER2|8864	1	1	1	PER2|8864	PER2|8864	PER2|8864
114	64	ZNF883|169834	1	1	1	ZNF883|169834	ZNF883|169834	ZNF883|169834
115	62	JHDM1D|80853	1	1	1	JHDM1D|80853	JHDM1D|80853	JHDM1D|80853
116	61	TMED6|146456	1	1	1	TMED6|146456	TMED6|146456	TMED6|146456
117	59	SKA3|221150	1	1	1	SKA3|221150	SKA3|221150	SKA3|221150
118	59	RNF114|55905	1	1	1	RNF114|55905	RNF114|55905	RNF114|55905
119	59	PRKCQ|5588	1	1	1	PRKCQ|5588	PRKCQ|5588	PRKCQ|5588
120	57	KIF23|9493	1	1	1	KIF23|9493	KIF23|9493	KIF23|9493
121	57	AGPAT3|56894	1	1	1	AGPAT3|56894	AGPAT3|56894	AGPAT3|56894
122	56	YWHAB|7529	1	1	1	YWHAB|7529	YWHAB|7529	YWHAB|7529
123	56	TMEM203|94107	1	1	1	TMEM203|94107	TMEM203|94107	TMEM203|94107
124	56	INTS5|80789	1	1	1	INTS5|80789	INTS5|80789	INTS5|80789
125	53	TRIB3|57761	1	1	1	TRIB3|57761	TRIB3|57761	TRIB3|57761
126	53	PTN|5764	1	1	1	PTN|5764	PTN|5764	PTN|5764
127	53	EME1|146956	1	1	1	EME1|146956	EME1|146956	EME1|146956
128	53	ATP6V1B2|526	1	1	1	ATP6V1B2|526	ATP6V1B2|526	ATP6V1B2|526
129	53	ANKLE1|126549	1	1	1	ANKLE1|126549	ANKLE1|126549	ANKLE1|126549
130	52	RILPL1|353116	1	1	1	RILPL1|353116	RILPL1|353116	RILPL1|353116
131	52	GPR174|84636	1	1	1	GPR174|84636	GPR174|84636	GPR174|84636
132	49	MBD2|8932	1	1	1	MBD2|8932	MBD2|8932	MBD2|8932
133	48	CCNB2|9133	1	1	1	CCNB2|9133	CCNB2|9133	CCNB2|9133
134	47	STARD3|10948	1	1	1	STARD3|10948	STARD3|10948	STARD3|10948
135	46	MKNK2|2872	1	1	1	MKNK2|2872	MKNK2|2872	MKNK2|2872
136	45	WDHD1|11169	1	1	1	WDHD1|11169	WDHD1|11169	WDHD1|11169
137	44	TAGAP|117289	1	1	1	TAGAP|117289	TAGAP|117289	TAGAP|117289
138	44	MURC|347273	1	1	1	MURC|347273	MURC|347273	MURC|347273
139	44	C16orf54|283897	1	1	1	C16orf54|283897	C16orf54|283897	C16orf54|283897
140	43	UQCC|55245	1	1	1	UQCC|55245	UQCC|55245	UQCC|55245
141	43	PTK2B|2185	1	1	1	PTK2B|2185	PTK2B|2185	PTK2B|2185
142	42	FAM46C|54855	1	1	1	FAM46C|54855	FAM46C|54855	FAM46C|54855
143	42	EIF3L|51386	1	1	1	EIF3L|51386	EIF3L|51386	EIF3L|51386
144	41	TMEM66|51669	1	1	1	TMEM66|51669	TMEM66|51669	TMEM66|51669
145	41	FCRL6|343413	1	1	1	FCRL6|343413	FCRL6|343413	FCRL6|343413
146	41	ATP9B|374868	1	1	1	ATP9B|374868	ATP9B|374868	ATP9B|374868
147	40	MUC5B|727897	1	1	1	MUC5B|727897	MUC5B|727897	MUC5B|727897
148	40	ISPD|729920	1	1	1	ISPD|729920	ISPD|729920	ISPD|729920
149	39	SCUBE1|80274	1	1	1	SCUBE1|80274	SCUBE1|80274	SCUBE1|80274
150	39	GPR171|29909	1	1	1	GPR171|29909	GPR171|29909	GPR171|29909
151	39	CNDP2|55748	1	1	1	CNDP2|55748	CNDP2|55748	CNDP2|55748
152	38	CDC25A|993	1	1	1	CDC25A|993	CDC25A|993	CDC25A|993
153	38	BSPRY|54836	1	1	1	BSPRY|54836	BSPRY|54836	BSPRY|54836
154	38	AMPD3|272	1	1	1	AMPD3|272	AMPD3|272	AMPD3|272
155	37	TOM1|10043	1	1	1	TOM1|10043	TOM1|10043	TOM1|10043
156	37	TNFAIP6|7130	1	1	1	TNFAIP6|7130	TNFAIP6|7130	TNFAIP6|7130
157	37	CCDC6|8030	1	1	1	CCDC6|8030	CCDC6|8030	CCDC6|8030
158	35	DUSP12|11266	1	1	1	DUSP12|11266	DUSP12|11266	DUSP12|11266
159	34	SPC25|57405	1	1	1	SPC25|57405	SPC25|57405	SPC25|57405
160	34	SEPT1|1731	1	1	1	SEPT1|1731	SEPT1|1731	SEPT1|1731
161	34	NUDT1|4521	1	1	1	NUDT1|4521	NUDT1|4521	NUDT1|4521
162	34	CHEK1|1111	1	1	1	CHEK1|1111	CHEK1|1111	CHEK1|1111
163	33	CNTFR|1271	1	1	1	CNTFR|1271	CNTFR|1271	CNTFR|1271
164	32	SORBS2|8470	1	1	1	SORBS2|8470	SORBS2|8470	SORBS2|8470
165	31	WDR70|55100	1	1	1	WDR70|55100	WDR70|55100	WDR70|55100
166	31	SIT1|27240	1	1	1	SIT1|27240	SIT1|27240	SIT1|27240
167	31	RPS6KA1|6195	1	1	1	RPS6KA1|6195	RPS6KA1|6195	RPS6KA1|6195
168	31	IL5RA|3568	1	1	1	IL5RA|3568	IL5RA|3568	IL5RA|3568
169	31	IL2RB|3560	1	1	1	IL2RB|3560	IL2RB|3560	IL2RB|3560
170	31	CSE1L|1434	1	1	1	CSE1L|1434	CSE1L|1434	CSE1L|1434
171	30	SCEL|8796	1	1	1	SCEL|8796	SCEL|8796	SCEL|8796
172	30	POLL|27343	1	1	1	POLL|27343	POLL|27343	POLL|27343
173	30	CALU|813	1	1	1	CALU|813	CALU|813	CALU|813
174	30	ARMC3|219681	1	1	1	ARMC3|219681	ARMC3|219681	ARMC3|219681
175	29	WDR63|126820	1	1	1	WDR63|126820	WDR63|126820	WDR63|126820
176	29	CDC25B|994	1	1	1	CDC25B|994	CDC25B|994	CDC25B|994
177	28	ZNF516|9658	1	1	1	ZNF516|9658	ZNF516|9658	ZNF516|9658
178	28	S1PR4|8698	1	1	1	S1PR4|8698	S1PR4|8698	S1PR4|8698
179	28	RPAP3|79657	1	1	1	RPAP3|79657	RPAP3|79657	RPAP3|79657
180	28	PGR|5241	1	1	1	PGR|5241	PGR|5241	PGR|5241
181	27	STAC|6769	1	1	1	STAC|6769	STAC|6769	STAC|6769
182	27	RASGEF1B|153020	1	1	1	RASGEF1B|153020	RASGEF1B|153020	RASGEF1B|153020
183	27	MYBL2|4605	1	1	1	MYBL2|4605	MYBL2|4605	MYBL2|4605
184	27	KLRK1|22914	1	1	1	KLRK1|22914	KLRK1|22914	KLRK1|22914
185	27	BHLHA15|168620	1	1	1	BHLHA15|168620	BHLHA15|168620	BHLHA15|168620
186	27	ARHGAP11A|9824	1	1	1	ARHGAP11A|9824	ARHGAP11A|9824	ARHGAP11A|9824
187	26	PTX3|5806	1	1	1	PTX3|5806	PTX3|5806	PTX3|5806
188	26	INPP4A|3631	1	1	1	INPP4A|3631	INPP4A|3631	INPP4A|3631
189	26	FAHD2B|151313	1	1	1	FAHD2B|151313	FAHD2B|151313	FAHD2B|151313
190	26	EYA2|2139	1	1	1	EYA2|2139	EYA2|2139	EYA2|2139
191	25	CXCR5|643	1	1	1	CXCR5|643	CXCR5|643	CXCR5|643
192	25	C8orf79|57604	1	1	1	C8orf79|57604	C8orf79|57604	C8orf79|57604
193	25	C1orf186|440712	1	1	1	C1orf186|440712	C1orf186|440712	C1orf186|440712
194	24	STAU1|6780	1	1	1	STAU1|6780	STAU1|6780	STAU1|6780
195	24	GZMH|2999	1	1	1	GZMH|2999	GZMH|2999	GZMH|2999
196	23	ZNF772|400720	1	1	1	ZNF772|400720	ZNF772|400720	ZNF772|400720
197	23	PTPRCAP|5790	1	1	1	PTPRCAP|5790	PTPRCAP|5790	PTPRCAP|5790
198	23	NOXO1|124056	1	1	1	NOXO1|124056	NOXO1|124056	NOXO1|124056
199	23	LYN|4067	1	1	1	LYN|4067	LYN|4067	LYN|4067
200	23	LRFN1|57622	1	1	1	LRFN1|57622	LRFN1|57622	LRFN1|57622
201	23	LPXN|9404	1	1	1	LPXN|9404	LPXN|9404	LPXN|9404
202	23	LEPROTL1|23484	1	1	1	LEPROTL1|23484	LEPROTL1|23484	LEPROTL1|23484
203	23	KIAA0415|9907	1	1	1	KIAA0415|9907	KIAA0415|9907	KIAA0415|9907
204	23	IK|3550	1	1	1	IK|3550	IK|3550	IK|3550
205	23	HMGB2|3148	1	1	1	HMGB2|3148	HMGB2|3148	HMGB2|3148
206	23	HEXIM2|124790	1	1	1	HEXIM2|124790	HEXIM2|124790	HEXIM2|124790
207	23	EYA4|2070	1	1	1	EYA4|2070	EYA4|2070	EYA4|2070
208	23	ARSD|414	1	1	1	ARSD|414	ARSD|414	ARSD|414
209	22	IGF1|3479	1	1	1	IGF1|3479	IGF1|3479	IGF1|3479
210	22	DHX35|60625	1	1	1	DHX35|60625	DHX35|60625	DHX35|60625
211	21	ZFP64|55734	1	1	1	ZFP64|55734	ZFP64|55734	ZFP64|55734
212	21	SNX20|124460	1	1	1	SNX20|124460	SNX20|124460	SNX20|124460
213	21	PAM|5066	1	1	1	PAM|5066	PAM|5066	PAM|5066
214	21	MYBPC2|4606	1	1	1	MYBPC2|4606	MYBPC2|4606	MYBPC2|4606
215	21	LARP4B|23185	1	1	1	LARP4B|23185	LARP4B|23185	LARP4B|23185
216	21	ERLIN1|10613	1	1	1	ERLIN1|10613	ERLIN1|10613	ERLIN1|10613
217	21	EEF2|1938	1	1	1	EEF2|1938	EEF2|1938	EEF2|1938
218	21	CTBP2|1488	1	1	1	CTBP2|1488	CTBP2|1488	CTBP2|1488
219	21	CFLAR|8837	1	1	1	CFLAR|8837	CFLAR|8837	CFLAR|8837
220	21	C20orf4|25980	1	1	1	C20orf4|25980	C20orf4|25980	C20orf4|25980
221	21	ALDH2|217	1	1	1	ALDH2|217	ALDH2|217	ALDH2|217
222	200	YTHDF1|54915	1	1	1	YTHDF1|54915	YTHDF1|54915	YTHDF1|54915
223	200	GJC1|10052	1	1	1	GJC1|10052	GJC1|10052	GJC1|10052
224	200	FBXO17|115290	1	1	1	FBXO17|115290	FBXO17|115290	FBXO17|115290
225	20	TMEFF1|8577	1	1	1	TMEFF1|8577	TMEFF1|8577	TMEFF1|8577
226	20	SPC24|147841	1	1	1	SPC24|147841	SPC24|147841	SPC24|147841
227	20	PSMD3|5709	1	1	1	PSMD3|5709	PSMD3|5709	PSMD3|5709
228	20	COL4A3BP|10087	1	1	1	COL4A3BP|10087	COL4A3BP|10087	COL4A3BP|10087
229	20	CHAF1A|10036	1	1	1	CHAF1A|10036	CHAF1A|10036	CHAF1A|10036
230	199	DDX27|55661	1	1	1	DDX27|55661	DDX27|55661	DDX27|55661
231	199	CHMP7|91782	1	1	1	CHMP7|91782	CHMP7|91782	CHMP7|91782
232	198	TACR1|6869	1	1	1	TACR1|6869	TACR1|6869	TACR1|6869
233	197	C6orf145|221749	1	1	1	C6orf145|221749	C6orf145|221749	C6orf145|221749
234	196	NUP107|57122	1	1	1	NUP107|57122	NUP107|57122	NUP107|57122
235	195	EGFR|1956	1	1	1	EGFR|1956	EGFR|1956	EGFR|1956
236	193	ADAM28|10863	1	1	1	ADAM28|10863	ADAM28|10863	ADAM28|10863
237	192	PARP8|79668	1	1	1	PARP8|79668	PARP8|79668	PARP8|79668
238	192	GPR18|2841	1	1	1	GPR18|2841	GPR18|2841	GPR18|2841
239	190	FAM64A|54478	1	1	1	FAM64A|54478	FAM64A|54478	FAM64A|54478
240	19	ORMDL3|94103	1	1	1	ORMDL3|94103	ORMDL3|94103	ORMDL3|94103
241	19	MFHAS1|9258	1	1	1	MFHAS1|9258	MFHAS1|9258	MFHAS1|9258
242	188	DOCK5|80005	1	1	1	DOCK5|80005	DOCK5|80005	DOCK5|80005
243	187	TTC9|23508	1	1	1	TTC9|23508	TTC9|23508	TTC9|23508
244	187	KCNRG|283518	1	1	1	KCNRG|283518	KCNRG|283518	KCNRG|283518
245	185	PFDN4|5203	1	1	1	PFDN4|5203	PFDN4|5203	PFDN4|5203
246	184	ITGB7|3695	1	1	1	ITGB7|3695	ITGB7|3695	ITGB7|3695
247	181	HOXA1|3198	1	1	1	HOXA1|3198	HOXA1|3198	HOXA1|3198
248	18	XPO5|57510	1	1	1	XPO5|57510	XPO5|57510	XPO5|57510
249	18	TCF25|22980	1	1	1	TCF25|22980	TCF25|22980	TCF25|22980
250	18	MARCKS|4082	1	1	1	MARCKS|4082	MARCKS|4082	MARCKS|4082
251	18	ENPP3|5169	1	1	1	ENPP3|5169	ENPP3|5169	ENPP3|5169
252	179	PSTPIP1|9051	1	1	1	PSTPIP1|9051	PSTPIP1|9051	PSTPIP1|9051
253	178	KIF13B|23303	1	1	1	KIF13B|23303	KIF13B|23303	KIF13B|23303
254	177	SYK|6850	1	1	1	SYK|6850	SYK|6850	SYK|6850
255	175	KIF15|56992	1	1	1	KIF15|56992	KIF15|56992	KIF15|56992
256	175	CDC42SE2|56990	1	1	1	CDC42SE2|56990	CDC42SE2|56990	CDC42SE2|56990
257	174	AVIL|10677	1	1	1	AVIL|10677	AVIL|10677	AVIL|10677
258	173	STX19|415117	1	1	1	STX19|415117	STX19|415117	STX19|415117
259	170	AKNA|80709	1	1	1	AKNA|80709	AKNA|80709	AKNA|80709
260	17	SLC18A2|6571	1	1	1	SLC18A2|6571	SLC18A2|6571	SLC18A2|6571
261	17	GZMM|3004	1	1	1	GZMM|3004	GZMM|3004	GZMM|3004
262	17	DAPL1|92196	1	1	1	DAPL1|92196	DAPL1|92196	DAPL1|92196
263	168	DTHD1|401124	1	1	1	DTHD1|401124	DTHD1|401124	DTHD1|401124
264	165	CDCA2|157313	1	1	1	CDCA2|157313	CDCA2|157313	CDCA2|157313
265	162	SGOL2|151246	1	1	1	SGOL2|151246	SGOL2|151246	SGOL2|151246
266	16	XKRX|402415	1	1	1	XKRX|402415	XKRX|402415	XKRX|402415
267	16	TLR3|7098	1	1	1	TLR3|7098	TLR3|7098	TLR3|7098
268	16	SYTL3|94120	1	1	1	SYTL3|94120	SYTL3|94120	SYTL3|94120
269	16	RNF144B|255488	1	1	1	RNF144B|255488	RNF144B|255488	RNF144B|255488
270	16	REEP4|80346	1	1	1	REEP4|80346	REEP4|80346	REEP4|80346
271	16	RAB36|9609	1	1	1	RAB36|9609	RAB36|9609	RAB36|9609
272	16	HKDC1|80201	1	1	1	HKDC1|80201	HKDC1|80201	HKDC1|80201
273	16	GNB3|2784	1	1	1	GNB3|2784	GNB3|2784	GNB3|2784
274	16	ERBB2|2064	1	1	1	ERBB2|2064	ERBB2|2064	ERBB2|2064
275	16	DAK|26007	1	1	1	DAK|26007	DAK|26007	DAK|26007
276	16	C2orf54|79919	1	1	1	C2orf54|79919	C2orf54|79919	C2orf54|79919
277	16	C1orf52|148423	1	1	1	C1orf52|148423	C1orf52|148423	C1orf52|148423
278	159	CYP27B1|1594	1	1	1	CYP27B1|1594	CYP27B1|1594	CYP27B1|1594
279	156	PDRG1|81572	1	1	1	PDRG1|81572	PDRG1|81572	PDRG1|81572
280	153	ELP3|55140	1	1	1	ELP3|55140	ELP3|55140	ELP3|55140
281	153	C10orf95|79946	1	1	1	C10orf95|79946	C10orf95|79946	C10orf95|79946
282	152	GZMK|3003	1	1	1	GZMK|3003	GZMK|3003	GZMK|3003
283	151	NLRC3|197358	1	1	1	NLRC3|197358	NLRC3|197358	NLRC3|197358
284	151	CCDC108|255101	1	1	1	CCDC108|255101	CCDC108|255101	CCDC108|255101
285	15	TIRAP|114609	1	1	1	TIRAP|114609	TIRAP|114609	TIRAP|114609
286	15	NKAIN1|79570	1	1	1	NKAIN1|79570	NKAIN1|79570	NKAIN1|79570
287	15	MAP7D3|79649	1	1	1	MAP7D3|79649	MAP7D3|79649	MAP7D3|79649
288	15	CTSB|1508	1	1	1	CTSB|1508	CTSB|1508	CTSB|1508
289	15	ANKRD44|91526	1	1	1	ANKRD44|91526	ANKRD44|91526	ANKRD44|91526
290	144	TOP2A|7153	1	1	1	TOP2A|7153	TOP2A|7153	TOP2A|7153
291	143	PRC1|9055	1	1	1	PRC1|9055	PRC1|9055	PRC1|9055
292	143	ESR1|2099	1	1	1	ESR1|2099	ESR1|2099	ESR1|2099
293	141	CXCR3|2833	1	1	1	CXCR3|2833	CXCR3|2833	CXCR3|2833
294	140	TMEM194A|23306	1	1	1	TMEM194A|23306	TMEM194A|23306	TMEM194A|23306
295	14	PDCD1|5133	1	1	1	PDCD1|5133	PDCD1|5133	PDCD1|5133
296	14	CD27|939	1	1	1	CD27|939	CD27|939	CD27|939
297	14	ARFGAP1|55738	1	1	1	ARFGAP1|55738	ARFGAP1|55738	ARFGAP1|55738
298	138	CXCR6|10663	1	1	1	CXCR6|10663	CXCR6|10663	CXCR6|10663
299	131	TBC1D10C|374403	1	1	1	TBC1D10C|374403	TBC1D10C|374403	TBC1D10C|374403
300	13	SUN1|23353	1	1	1	SUN1|23353	SUN1|23353	SUN1|23353
301	13	SLFN12L|342615	1	1	1	SLFN12L|342615	SLFN12L|342615	SLFN12L|342615
302	13	GARS|2617	1	1	1	GARS|2617	GARS|2617	GARS|2617
303	13	DLL3|10683	1	1	1	DLL3|10683	DLL3|10683	DLL3|10683
304	13	CNR2|1269	1	1	1	CNR2|1269	CNR2|1269	CNR2|1269
305	13	ARMC4|55130	1	1	1	ARMC4|55130	ARMC4|55130	ARMC4|55130
306	128	FASLG|356	1	1	1	FASLG|356	FASLG|356	FASLG|356
307	124	ENTPD4|9583	1	1	1	ENTPD4|9583	ENTPD4|9583	ENTPD4|9583
308	123	CD5|921	1	1	1	CD5|921	CD5|921	CD5|921
309	12	R3HCC1|203069	1	1	1	R3HCC1|203069	R3HCC1|203069	R3HCC1|203069
310	12	HPS6|79803	1	1	1	HPS6|79803	HPS6|79803	HPS6|79803
311	12	HOXD13|3239	1	1	1	HOXD13|3239	HOXD13|3239	HOXD13|3239
312	12	FZD7|8324	1	1	1	FZD7|8324	FZD7|8324	FZD7|8324
313	12	C19orf44|84167	1	1	1	C19orf44|84167	C19orf44|84167	C19orf44|84167
314	119	NUDT18|79873	1	1	1	NUDT18|79873	NUDT18|79873	NUDT18|79873
315	116	SHOX2|6474	1	1	1	SHOX2|6474	SHOX2|6474	SHOX2|6474
316	115	TTC7B|145567	1	1	1	TTC7B|145567	TTC7B|145567	TTC7B|145567
317	115	FAM179A|165186	1	1	1	FAM179A|165186	FAM179A|165186	FAM179A|165186
318	114	TNIP1|10318	1	1	1	TNIP1|10318	TNIP1|10318	TNIP1|10318
319	114	RSPO1|284654	1	1	1	RSPO1|284654	RSPO1|284654	RSPO1|284654
320	114	C10orf26|54838	1	1	1	C10orf26|54838	C10orf26|54838	C10orf26|54838
321	111	MAP6D1|79929	1	1	1	MAP6D1|79929	MAP6D1|79929	MAP6D1|79929
322	111	IFT52|51098	1	1	1	IFT52|51098	IFT52|51098	IFT52|51098
323	11	TNFRSF10B|8795	1	1	1	TNFRSF10B|8795	TNFRSF10B|8795	TNFRSF10B|8795
324	11	TNFRSF10A|8797	1	1	1	TNFRSF10A|8797	TNFRSF10A|8797	TNFRSF10A|8797
325	11	RASAL3|64926	1	1	1	RASAL3|64926	RASAL3|64926	RASAL3|64926
326	11	NUSAP1|51203	1	1	1	NUSAP1|51203	NUSAP1|51203	NUSAP1|51203
327	11	MAP4K1|11184	1	1	1	MAP4K1|11184	MAP4K1|11184	MAP4K1|11184
328	11	KCNMA1|3778	1	1	1	KCNMA1|3778	KCNMA1|3778	KCNMA1|3778
329	11	FAM32A|26017	1	1	1	FAM32A|26017	FAM32A|26017	FAM32A|26017
330	11	E2F1|1869	1	1	1	E2F1|1869	E2F1|1869	E2F1|1869
331	11	CYP7B1|9420	1	1	1	CYP7B1|9420	CYP7B1|9420	CYP7B1|9420
332	11	CD6|923	1	1	1	CD6|923	CD6|923	CD6|923
333	11	ADRA2B|151	1	1	1	ADRA2B|151	ADRA2B|151	ADRA2B|151
334	107	GSR|2936	1	1	1	GSR|2936	GSR|2936	GSR|2936
335	105	FAM160B2|64760	1	1	1	FAM160B2|64760	FAM160B2|64760	FAM160B2|64760
336	105	EEF1B2|1933	1	1	1	EEF1B2|1933	EEF1B2|1933	EEF1B2|1933
337	104	NLRX1|79671	1	1	1	NLRX1|79671	NLRX1|79671	NLRX1|79671
338	104	MAD2L1|4085	1	1	1	MAD2L1|4085	MAD2L1|4085	MAD2L1|4085
339	104	C9orf25|203259	1	1	1	C9orf25|203259	C9orf25|203259	C9orf25|203259
340	102	USP54|159195	1	1	1	USP54|159195	USP54|159195	USP54|159195
341	10	WDR62|284403	1	1	1	WDR62|284403	WDR62|284403	WDR62|284403
342	10	TXNDC3|51314	1	1	1	TXNDC3|51314	TXNDC3|51314	TXNDC3|51314
343	10	SYTL1|84958	1	1	1	SYTL1|84958	SYTL1|84958	SYTL1|84958
344	10	STX18|53407	1	1	1	STX18|53407	STX18|53407	STX18|53407
345	10	RP9|6100	1	1	1	RP9|6100	RP9|6100	RP9|6100
346	10	RACGAP1|29127	1	1	1	RACGAP1|29127	RACGAP1|29127	RACGAP1|29127
347	10	MSL1|339287	1	1	1	MSL1|339287	MSL1|339287	MSL1|339287
348	10	IKZF2|22807	1	1	1	IKZF2|22807	IKZF2|22807	IKZF2|22807
349	10	GTPBP4|23560	1	1	1	GTPBP4|23560	GTPBP4|23560	GTPBP4|23560
350	10	FKBP9|11328	1	1	1	FKBP9|11328	FKBP9|11328	FKBP9|11328
351	10	FBXO18|84893	1	1	1	FBXO18|84893	FBXO18|84893	FBXO18|84893
352	10	FANCD2|2177	1	1	1	FANCD2|2177	FANCD2|2177	FANCD2|2177
353	10	C17orf96|100170841	1	1	1	C17orf96|100170841	C17orf96|100170841	C17orf96|100170841
354	10	ALCAM|214	1	1	1	ALCAM|214	ALCAM|214	ALCAM|214

## Sheet: 1D
cluster #3
#Gene|GeneId	description	direction(for_geneset_enrichment)	harmonic_mean_rank	CorEx_category	#trials(200)	#trials(200)_by_cluster	ecDNA(+)_sum	ecDNA(+)_mean	ecDNA(+)_std	ecDNA(+)_median	ecDNA(-)_sum	ecDNA(-)_mean	ecDNA(-)_std	ecDNA(-)_median
TPX2|22974	TPX2, microtubule-associated	UP	2.67541	Core	194	200	2598.58	11.11	0.99	11.3	6590.77	10.36	1.48	10.67
SPAG5|10615	sperm associated antigen 5	UP	2.96472	Core	46	200	2319.41	9.91	0.96	10.06	5904.99	9.28	1.24	9.5
GSG2|83903	germ cell associated 2 (haspin)	UP	2.98281	Core	13	200	1531.54	6.55	1.02	6.61	3799.42	5.97	1.48	6.25
AURKA|6790	aurora kinase A	UP	2.86125	Core	184	200	2188.58	9.35	1.02	9.56	5486.01	8.63	1.41	8.93
KIF2C|11004	kinesin family member 2C	UP	2.79838	Core	190	200	2264.04	9.68	0.98	9.85	5673.69	8.92	1.64	9.27
TRIP13|9319	thyroid hormone receptor interactor 13	UP	2.97993	Core	15	200	2122.73	9.07	1.09	9.13	5335.34	8.39	1.39	8.65
BUB1|699	BUB1 mitotic checkpoint serine/threonine kinase	UP	2.97234	Core	35	200	2209.62	9.44	0.98	9.64	5536.29	8.7	1.55	9.12
CDCA5|113130	cell division cycle associated 5	UP	2.98403	Core	10	200	2256.47	9.64	0.95	9.7	5767.83	9.07	1.3	9.25
KIF4A|24137	kinesin family member 4A	UP	2.98159	Core	15	200	2181.64	9.32	0.99	9.47	5508.97	8.66	1.52	9.02
ORC1L|4998	origin recognition complex, subunit 1	UP	2.98685	co-expressed	0	200	1806.7	7.72	1.06	7.88	4565.04	7.18	1.63	7.47
RAD51|5888	RAD51 recombinase	UP	2.98652	co-expressed	1	200	1877.04	8.02	0.99	8.17	4695.62	7.38	1.44	7.71
CDC6|990	cell division cycle 6	UP	2.98762	co-expressed	0	200	2169.14	9.27	1.21	9.35	5518.36	8.68	1.49	9.02
RAD54L|8438	RAD54-like (S. cerevisiae)	UP	2.986	co-expressed	3	200	1880.2	8.04	1.04	8.21	4727.1	7.43	1.54	7.72
CDC45|8318	cell division cycle 45	UP	2.98785	co-expressed	0	200	1958.62	8.37	1.19	8.46	4858.56	7.64	1.76	8.02
CDC20|991	cell division cycle 20	UP	2.98694	co-expressed	0	200	2395.53	10.24	1.16	10.4	6074.15	9.55	1.82	10.02
FOXM1|2305	forkhead box M1	UP	2.98698	co-expressed	0	200	2482.66	10.61	1.02	10.65	6354.28	9.99	1.5	10.21
PLK1|5347	polo-like kinase 1	UP	2.9866	co-expressed	2	200	2300.38	9.83	1.09	10.04	5832.7	9.17	1.49	9.53
NCAPH|23397	non-SMC condensin I complex, subunit H	UP	2.98299	co-expressed	9	200	2079.18	8.89	1.04	9.08	5224.55	8.21	1.39	8.51
MCM10|55388	minichromosome maintenance complex component 10	UP	2.98674	co-expressed	0	200	1891.58	8.08	1.2	8.28	4693.35	7.38	1.64	7.65
CDCA8|55143	cell division cycle associated 8	UP	2.98678	co-expressed	0	200	2188.29	9.35	0.97	9.47	5550.22	8.73	1.56	9.14
KPNA2|3838	karyopherin alpha 2 (RAG cohort 1, importin alpha 1)	UP	2.98755	co-expressed	0	200	2746.62	11.74	0.82	11.87	7222.46	11.36	0.98	11.5
overall core							19672.6	9.34	1.51	9.59	49603.3	8.67	1.82	9
overall co-expressed							25775.9	9.18	1.6	9.15	65316.4	8.56	1.97	8.69
cluster #74
#Gene|GeneId	description	direction(for_geneset_enrichment)	harmonic_mean_rank	CorEx_category	#trials(200)	#trials(200)_by_cluster	ecDNA(+)_sum	ecDNA(+)_mean	ecDNA(+)_std	ecDNA(+)_median	ecDNA(-)_sum	ecDNA(-)_mean	ecDNA(-)_std	ecDNA(-)_median
RAE1|8480	ribonucleic acid export 1	UP	1	Core	200	200	2336.52	9.99	0.56	9.94	6121.37	9.62	0.57	9.56
CSTF1|1477	cleavage stimulation factor, 3' pre-RNA, subunit 1, 50kDa	UP	2.98686	co-expressed	0	200	2220.95	9.49	0.52	9.47	5940.23	9.34	0.47	9.33
overall core							2336.52	9.99	0.56	9.94	6121.37	9.62	0.57	9.56
overall co-expressed							2220.95	9.49	0.52	9.47	5940.23	9.34	0.47	9.33

## Sheet: 1E
Gene	TCGA	LUAD	BLCA	HNSC	BRCA	STAD	ESCA	CESC	LUSC	UCEC	SARC	LGG
SLC18A2|6571	-0.23046	-0.361559	-0.215909	-0.266071	-0.232016	-0.04	-0.0821256	-0.0649123	-0.610526	-0.342905	-0.231111	-0.310714
ELP3|55140	-0.272241	-0.170699	-0.262784	-0.49375	-0.369807	0.00235294	-0.0193237	-0.0350877	-0.463158	-0.336712	-0.226667	-0.461905
TACR1|6869	-0.305656	-0.360215	-0.264205	-0.285268	-0.420466	-0.111765	0.0676329	-0.182456	-0.326316	-0.349099	-0.226667	-0.495238
LEPROTL1|23484	-0.204537	-0.166667	-0.389205	-0.5	-0.173252	-0.172941	0.207729	-0.0561404	-0.631579	-0.242117	-0.04	-0.345238
EEF2|1938	-0.236844	-0.36828	-0.257102	-0.216071	-0.118541	-0.24	0.454106	0.133333	-0.473684	-0.537162	0.0488889	-0.62381
PSTPIP1|9051	-0.262377	-0.405914	-0.207386	-0.0839286	-0.209726	-0.462353	-0.193237	0.0842105	-0.273684	-0.217342	0.253333	-0.75
AKNA|80709	-0.304675	-0.288978	-0.174716	-0.331696	-0.33536	-0.509412	0.0821256	-0.0350877	-0.4	-0.182432	0.128889	-0.514286
FLT3|2322	-0.186207	-0.361559	0.0518466	-0.341964	-0.189463	-0.236471	0.0845411	0.340351	-0.557895	-0.0760135	0.0488889	-0.395238
FDFT1|2222	-0.147517	-0.193548	-0.0383523	-0.225	-0.187437	0.0423529	0.207729	0.136842	0.0526316	-0.0822072	-0.528889	-0.566667
EZH1|2145	-0.067086	-0.201613	-0.0923295	-0.180357	-0.00506586	-0.0823529	-0.0772947	-0.154386	0.105263	-0.0754505	-0.537778	-0.490476
MRPS27|23107	-0.20158	-0.297043	-0.1875	-0.167857	-0.157042	-0.350588	0.0531401	0.00701754	0.231579	-0.00112613	-0.555556	-0.616667
CBX7|23492	-0.193578	-0.443548	-0.278409	-0.0991071	-0.388045	-0.32	-0.0434783	-0.122807	0.0842105	-0.0146396	-0.404444	-0.459524
ALDH2|217	-0.262149	-0.200269	-0.170455	-0.189286	-0.339412	-0.272941	0.52657	0.0140351	0.136842	-0.138514	-0.324444	-0.711905
VPS37A|137492	-0.203247	-0.104839	-0.40625	-0.45	-0.306991	-0.195294	0.144928	-0.273684	0.147368	-0.118243	-0.44	-0.330952
FBXO25|26260	-0.181597	-0.0766129	-0.396307	-0.346429	-0.274569	0.0270588	0.231884	0.0947368	-0.0526316	-0.0495495	-0.12	-0.42619
EIF3L|51386	-0.210221	-0.400538	-0.137784	-0.10625	-0.181358	0.0282353	-0.057971	0.45614	-0.284211	-0.236486	-0.315556	-0.738095
SLC6A20|54716	-0.190621	-0.251344	0.0440341	0.251339	-0.0151976	-0.0176471	0.144928	0.154386	-0.2	-0.317568	-0.368889	-0.533333
EEF1B2|1933	-0.199437	-0.357527	-0.105114	-0.214732	-0.134752	0.0447059	0.178744	0.22807	-0.0421053	-0.166667	-0.182222	-0.742857
RPL3|6122	-0.243482	-0.424731	-0.177557	-0.104464	-0.10233	-0.191765	0.188406	0.294737	0.252632	-0.231982	-0.0311111	-0.714286
FRMPD2|143162	-0.200774	-0.268145	0.102273	-0.197768	-0.1692	0.04	0.0917874	0.022807	0.0631579	-0.365991	-0.168889	-0.469048
PCM1|5108	-0.28142	-0.0349462	-0.46733	-0.502679	-0.379939	-0.232941	-0.0289855	-0.410526	-0.694737	-0.252252	-0.324444	0.145238
TIRAP|114609	-0.197683	-0.247312	-0.0568182	-0.290179	-0.379939	-0.0411765	0.144928	-0.357895	-0.505263	-0.417793	-0.537778	-0.111905
ESR1|2099	-0.244853	-0.104839	-0.191761	-0.191964	-0.106383	-0.332941	-0.21256	-0.298246	-0.410526	-0.487613	-0.422222	-0.0333333
DOCK5|80005	-0.238591	-0.116935	-0.278409	-0.285714	-0.329281	-0.121176	-0.0483092	-0.294737	-0.515789	-0.51464	-0.253333	-0.0357143
XPO7|23039	-0.247474	-0.0510753	-0.427557	-0.538393	-0.347518	-0.0505882	0.144928	-0.410526	-0.4	-0.227477	-0.404444	-0.22381
KIAA1967|57805	-0.261235	-0.0846774	-0.5	-0.442857	-0.264438	-0.0858824	-0.00483092	-0.336842	-0.284211	-0.364865	-0.28	-0.119048
MCPH1|79648	-0.216114	-0.208333	-0.535511	-0.485714	-0.177305	-0.123529	0.231884	-0.312281	-0.273684	-0.190315	-0.36	-0.0809524
PER2|8864	-0.221859	0.0295699	-0.508523	-0.3875	-0.193516	0.145882	-0.0144928	-0.203509	-0.231579	-0.293919	-0.306667	-0.254762
ZNF516|9658	-0.223526	-0.0739247	-0.366477	-0.244643	0.0070922	-0.171765	0	-0.0912281	-0.178947	-0.432432	-0.28	-0.195238
CHMP7|91782	-0.316857	-0.403226	-0.640625	-0.536607	-0.0962513	-0.277647	-0.0193237	-0.154386	-0.347368	-0.420045	-0.404444	-0.316667
FAM160B2|64760	-0.242111	-0.163978	-0.666193	-0.360714	0.0233029	-0.283529	-0.0628019	-0.494737	-0.0315789	-0.381757	-0.324444	-0.0880952
RAI2|10742	-0.237274	-0.280914	-0.117898	-0.275	-0.177305	-0.0764706	0.0386473	-0.0807018	-0.252632	0.177928	-0.475556	-0.37619
ANKRD44|91526	-0.158274	-0.401882	-0.160511	-0.29375	-0.343465	-0.291765	-0.0386473	-0.0877193	-0.431579	0.036036	-0.555556	-0.240476
COL4A3BP|10087	-0.235634	-0.331989	-0.122159	-0.340179	-0.171226	-0.143529	-0.256039	-0.108772	-0.463158	-0.0563063	-0.368889	-0.309524
RSPO1|284654	-0.233229	-0.186828	0.0113636	-0.395536	-0.220871	-0.247059	-0.0700483	-0.157895	-0.257895	-0.0146396	-0.475556	-0.10119
CYP7B1|9420	-0.155815	-0.231183	-0.119318	-0.366071	-0.375887	-0.138824	0.0193237	-0.259649	-0.2	0.0185811	-0.342222	-0.252381
ZNF395|55893	-0.128245	-0.201613	-0.294034	-0.173214	-0.383992	-0.0282353	-0.10628	-0.221053	-0.210526	-0.0349099	-0.368889	-0.15
IPCEF1|26034	-0.301833	-0.189516	-0.383523	-0.363393	-0.227964	-0.308235	-0.130435	-0.129825	-0.305263	-0.192568	-0.484444	0.0047619
MFHAS1|9258	-0.177754	0.120968	-0.268466	-0.303571	-0.232016	-0.151765	-0.0966184	-0.192982	-0.210526	0.0382883	-0.413333	0.104762
SCUBE1|80274	-0.227289	-0.488575	-0.0738636	-0.396429	-0.120567	-0.334118	-0.00966184	0.0719298	-0.168421	-0.286036	-0.502222	-0.135714
C8orf41|80185	-0.199665	-0.391129	-0.409091	-0.41875	-0.217832	-0.261176	0.154589	-0.0175439	0.105263	-0.248874	-0.386667	-0.157143
R3HCC1|203069	-0.180374	-0.112903	-0.56108	-0.422321	-0.108409	-0.107059	0.125604	0.0245614	-0.0105263	-0.266892	-0.395556	-0.128571
GSR|2936	-0.186086	-0.334677	-0.338068	-0.254464	-0.132725	-0.181176	0.21256	-0.077193	0	-0.304054	-0.377778	0.178571
AGPAT3|56894	-0.210746	-0.172043	-0.149148	-0.389286	-0.035461	-0.567059	0.178744	0.00701754	-0.0210526	0.146396	-0.253333	-0.1
ERICH1|157697	-0.0949578	-0.258065	-0.40483	-0.434821	0.0982776	-0.144706	-0.154589	0.217544	0.0210526	0.0326577	-0.173333	0.0238095
ALCAM|214	-0.197898	-0.21371	0.0170455	-0.1125	-0.0840932	0.0552941	-0.231884	-0.231579	-0.515789	-0.323198	-0.253333	-0.583333
MLLT3|4300	-0.274069	-0.206989	-0.0553977	-0.140179	0.0172239	-0.135294	-0.231884	-0.182456	-0.705263	-0.0506757	0.0133333	-0.614286
TTC9|23508	-0.242851	-0.301075	-0.201705	-0.0964286	0.179331	0.0623529	-0.231884	-0.445614	-0.621053	-0.618243	0.182222	-0.333333
USP54|159195	-0.28572	-0.0456989	-0.142045	-0.377679	0.04154	-0.0188235	0.101449	-0.421053	-0.378947	-0.452703	-0.164444	-0.585714
FUT3|2525	-0.135583	-0.201613	-0.0440341	-0.186607	-0.0800405	0.0588235	-0.0241546	-0.396491	-0.2	-0.367117	-0.262222	-0.416667
FUT6|2528	-0.177216	-0.266129	0.0298295	-0.314286	-0.242148	0.22	-0.0772947	-0.364912	-0.284211	-0.403153	-0.328889	-0.235714
PCDH7|5099	-0.244947	-0.0967742	-0.386364	0.03125	-0.128673	-0.177647	-0.26087	-0.189474	0	-0.415541	-0.404444	-0.688095
KCNMA1|3778	-0.206492	-0.135753	-0.238636	-0.0508929	-0.286727	-0.224706	-0.193237	0.0210526	-0.210526	-0.307432	-0.511111	-0.266667
JHDM1D|80853	-0.195748	0.0228495	0.0355114	-0.0892857	-0.10233	-0.0282353	-0.280193	-0.192982	-0.0526316	-0.461712	-0.528889	-0.52381
C1orf230|284485	-0.182968	-0.189516	0.00852273	-0.119643	0.0921986	0.179412	-0.36715	0.00175439	0.0210526	-0.271959	-0.555556	-0.425
DAPL1|92196	-0.16797	-0.369624	-0.442472	-0.0754464	0.108409	0.09	-0.26087	-0.312281	-0.0947368	0.0872748	-0.297778	-0.830952
MIPOL1|145282	-0.082527	-0.00403226	-0.150568	0.0919643	0.179331	0.178824	0.0628019	-0.561404	0.0526316	-0.328829	-0.386667	-0.52619
SLC25A21|89874	-0.149754	-0.178763	-0.397727	0.08125	0.0739615	-0.0858824	-0.0676329	-0.438596	0.178947	-0.35473	-0.217778	-0.514286
IK|3550	-0.138022	-0.24328	-0.170455	-0.178571	0.183384	0.264706	-0.125604	0.164912	-0.463158	0.0720721	-0.52	-0.3
HKDC1|80201	-0.218594	-0.299731	-0.318182	0.0464286	0.183384	0.270588	0.0386473	-0.108772	-0.126316	-0.222973	-0.404444	-0.404762
SCEL|8796	-0.129522	-0.129032	-0.240767	-0.14375	-0.0699088	0.207059	-0.275362	-0.470175	-0.578947	0.301802	-0.217778	-0.290476
MUC4|4585	-0.103612	0.0806452	-0.278409	-0.190179	0.130699	0.190588	0.0821256	-0.361404	-0.431579	0.286036	-0.44	0.12381
C9orf169|375791	-0.0503548	-0.223118	-0.144886	-0.174107	0.175279	0.0858824	-0.0676329	-0.270175	-0.2	0.117117	-0.404444	0.0642857
XKRX|402415	-0.159141	-0.0188172	-0.34517	0.01875	0.18541	0.101176	-0.52657	-0.431579	-0.568421	-0.426802	-0.342222	0.366667
CDHR4|389118	-0.195842	-0.295027	-0.147727	0.191964	0.0101317	0.0288235	-0.318841	-0.0842105	-0.352632	-0.27759	-0.177778	0.12619
CCDC17|149483	-0.0705733	-0.0981183	-0.0241477	0.2125	0.120567	0.0952941	-0.236715	-0.0982456	-0.168421	-0.334459	-0.0933333	-0.109524
THEM5|284486	-0.0630006	-0.206989	-0.166193	0.110714	-0.0455927	0.0305882	-0.00483092	-0.463158	-0.294737	-0.0844595	-0.217778	0.128571
HEXIM2|124790	-0.129327	-0.0147849	0.0752841	0.124107	-0.0516717	-0.0588235	-0.111111	0.147368	0.452632	-0.412162	-0.422222	-0.502381
DGCR2|9993	-0.115553	0.0228495	-0.0696023	0.358036	0.0942249	-0.295294	-0.256039	0.045614	0.2	-0.32545	-0.0666667	-0.591667
ELMO3|79767	-0.042641	-0.247312	0.0113636	0.280357	0.159068	-0.171765	-0.246377	0.077193	0.673684	-0.332207	-0.422222	-0.0380952
MORN5|254956	-0.200525	-0.263441	-0.130682	0.171875	0.0253293	0.00235294	0.198068	0.166667	-0.178947	-0.313063	-0.8	0.0404762
DAK|26007	-0.196998	-0.384409	-0.0724432	0.0669643	0.144883	-0.174118	-0.120773	0.150877	0	-0.261261	-0.422222	-0.0857143
PTCD2|79810	-0.0118328	-0.193548	-0.0980114	0.04375	0.0273556	-0.0729412	-0.0676329	0.0877193	0.242105	0.351351	-0.617778	-0.152381
INTS5|80789	-0.220085	-0.198925	-0.105114	-0.0991071	-0.181358	-0.118824	0.0917874	-0.0596491	-0.378947	-0.0844595	-0.146667	-0.388095
ARMC4|55130	-0.231918	-0.0712366	-0.215199	-0.197321	-0.18541	0.111176	-0.10628	-0.0701754	-0.3	-0.233108	-0.146667	-0.314286
MS4A8B|83661	-0.160337	-0.22043	-0.00710227	0.00535714	-0.0314083	0.00588235	0.207729	0.00175439	-0.321053	-0.182432	-0.0755556	-0.146429
DMBT1|1755	-0.148934	-0.334677	0.056108	-0.0946429	-0.0212766	0.0905882	0.149758	-0.0596491	-0.263158	-0.211712	0.173333	-0.190476
TUBA4B|80086	-0.130832	-0.231183	-0.0255682	0.188393	-0.0526849	0.408235	0.111111	-0.242105	-0.263158	-0.219595	-0.4	-0.0238095
TMEM190|147744	-0.105581	-0.139785	0.143466	0.0589286	0	0.367059	0.253623	-0.147368	-0.4	-0.0765766	0.0577778	0.171429
ZBBX|79740	-0.186838	-0.133065	0.0681818	-0.0714286	-0.267477	0.289412	0.0821256	0.0947368	-0.431579	-0.184685	-0.12	-0.22619
ARMC3|219681	-0.237119	-0.137769	-0.00426136	-0.0741071	-0.163121	0.290588	-0.0652174	0.0421053	-0.115789	-0.38964	-0.208889	-0.17381
C20orf85|128602	-0.187389	-0.209677	-0.00852273	0.0830357	-0.218845	0.398824	0.0724638	0.0508772	-0.305263	-0.310811	-0.146667	-0.0571429
SNTN|132203	-0.169663	-0.346774	0.0752841	0.137054	-0.147923	0.267647	0.0434783	-0.0842105	-0.336842	-0.342905	-0.00444444	0.0166667
LDLRAD1|388633	-0.21553	-0.31922	-0.176136	-0.175446	0.00506586	0.364706	-0.152174	-0.173684	-0.389474	-0.189189	0	-0.0142857
FAM46C|54855	-0.249395	-0.0793011	-0.046875	-0.4	-0.264438	0.0317647	0.0144928	-0.0175439	-0.0947368	-0.42455	-0.555556	-0.0928571
EPB49|2039	-0.247964	-0.133065	-0.0894886	-0.322321	-0.262411	0.0858824	0.0241546	-0.298246	-0.0947368	-0.204955	-0.484444	0.0619048
BHLHA15|168620	-0.198772	-0.116935	0.015625	-0.320536	-0.227964	0.241176	0.207729	-0.14386	-0.0842105	-0.210023	-0.444444	0.0928571
CRB3|92359	-0.162474	-0.0483871	0.257102	-0.247321	0.0678825	-0.0564706	0.154589	-0.0561404	0.168421	-0.453829	-0.524444	0.0404762
CCDC108|255101	-0.233249	-0.139785	0.147727	0.0696429	-0.140831	0.131765	0.256039	-0.121053	-0.152632	-0.501126	-0.146667	-0.255952
BSPRY|54836	-0.198967	-0.0551075	0.136364	0.0598214	-0.130699	-0.167059	0.2657	-0.101754	0.0631579	-0.498874	-0.328889	-0.121429
C1orf192|257177	-0.184412	-0.177419	0.144886	-0.254464	-0.144883	0.0294118	0.541063	0.0385965	-0.2	-0.245495	-0.226667	0.052381
DCDC2B|149069	-0.120008	-0.100806	0.103693	-0.111607	0.029382	0.118824	0.200483	-0.210526	-0.178947	-0.245495	-0.288889	0.108333
APOBEC4|403314	-0.140495	-0.247312	-0.0127841	-0.0169643	-0.0587639	0.121765	0.253623	-0.140351	-0.0631579	-0.283784	-0.182222	0.280952
C1orf194|127003	-0.17729	-0.111559	0.0852273	-0.00178571	0.0658561	0.205882	-0.057971	0.0578947	-0.0947368	-0.356419	-0.226667	0.185714
C11orf16|56673	-0.182128	-0.219086	0.171875	-0.208036	-0.21074	0.0211765	-0.0483092	-0.164912	-0.110526	-0.238739	-0.142222	0.0928571
MUC5B|727897	-0.219467	-0.327957	-0.00568182	-0.121429	0.0131712	0.0423529	0.0821256	0.14386	-0.494737	-0.51464	-0.422222	0.00714286
PGR|5241	-0.253131	-0.139785	-0.015625	-0.174107	-0.183384	-0.257647	-0.0144928	-0.0350877	-0.505263	-0.48536	-0.28	-0.00238095
ENPP3|5169	-0.242253	-0.061828	0.0426136	-0.300893	-0.243161	-0.0882353	0.149758	-0.105263	-0.347368	-0.51295	-0.208889	0.154762
SLC40A1|30061	-0.152005	-0.252688	-0.0610795	-0.103571	-0.128673	0.0282353	0.164251	0.17193	-0.4	-0.466216	-0.04	0.114286
VWA3A|146177	-0.140562	-0.133065	-0.140625	0.1	0.0111449	0.143529	0.128019	0.077193	-0.315789	-0.442568	-0.0311111	0.0333333
FAM81B|153643	-0.193222	-0.353495	-0.181818	-0.00625	-0.158055	0.0152941	0.0821256	0.0421053	-0.294737	-0.225225	-0.0444444	0.154762
CCDC135|84229	-0.172425	-0.0954301	0.129261	-0.0678571	-0.140831	0.125882	0.0241546	0.1	-0.447368	-0.307995	0.0311111	0.340476
YSK4|80122	-0.15857	-0.22043	0.138494	0.120089	-0.109422	0.04	-0.137681	0.1	-0.242105	-0.302365	0.0222222	0.244048
RSPH4A|345895	-0.16494	-0.0564516	-0.105114	-0.0589286	-0.134752	0.0882353	-0.0483092	-0.0736842	-0.515789	-0.345721	-0.217778	0.614286
EYA2|2139	-0.051833	0.110215	-0.353693	-0.120536	0.0901722	0.194118	0.275362	-0.0175439	-0.284211	-0.433559	0.0133333	0.459524
BCL2L15|440603	-0.192066	-0.141129	-0.167614	-0.11875	-0.0618034	-0.0423529	0.0241546	-0.101754	-0.263158	-0.411036	-0.182222	0.357143
ST6GALNAC1|55808	-0.26528	-0.204301	-0.27983	-0.125	-0.163121	0.0211765	-0.00483092	-0.207018	0.0210526	-0.433559	-0.12	0.309524
GCHFR|2644	-0.19339	-0.25	-0.174716	0.00357143	0.0618034	0.158824	-0.2657	-0.221053	-0.0526316	-0.402027	-0.208889	0.302381
C6orf97|80129	-0.278477	-0.436828	-0.134943	-0.166071	-0.232016	0.00235294	0.00966184	-0.0666667	-0.652632	-0.358108	0.413333	-0.192857
IGF1|3479	-0.23937	-0.205645	-0.09375	-0.160714	-0.345491	-0.262353	-0.164251	-0.315789	-0.578947	-0.0743243	0.608889	-0.22619
RASGEF1B|153020	-0.23898	-0.415323	-0.234375	-0.175893	-0.0557244	-0.381176	-0.0917874	-0.2	-0.368421	0.0123874	0.484444	-0.402381
C10orf26|54838	-0.263156	-0.418011	-0.285511	-0.116964	-0.238095	-0.181176	-0.0434783	-0.140351	-0.189474	-0.260135	0.626667	-0.642857
FOLR2|2350	-0.092727	-0.400538	-0.0497159	0.0696429	-0.337386	-0.103529	-0.0724638	-0.0175439	-0.189474	-0.191441	0.6	-0.409524
ERLIN1|10613	-0.123192	-0.248656	-0.130682	-0.0839286	-0.304965	-0.322353	-0.169082	-0.0736842	0.210526	-0.310811	0.617778	-0.45
TRIM8|81603	-0.2509	-0.0215054	-0.184659	-0.301786	-0.191489	-0.117647	-0.0241546	-0.0175439	-0.126316	-0.0315315	0.626667	-0.85
CTBP2|1488	-0.197925	-0.0806452	-0.0866477	-0.075	0.0557244	-0.0952941	0.140097	-0.315789	-0.0315789	-0.277027	0.413333	-0.704762
BCR|613	-0.217116	-0.0967742	-0.00426136	-0.107143	-0.00911854	-0.242353	-0.140097	0.00701754	0.2	-0.114865	0.28	-0.75
FAM179A|165186	-0.267739	-0.294355	-0.181108	-0.230357	-0.00405268	-0.244706	-0.193237	-0.077193	-0.0105263	-0.301802	0.173333	-0.561905
HPS6|79803	-0.210504	-0.209677	-0.322443	-0.0321429	0.191489	-0.16	0.0531401	-0.0982456	0.252632	-0.0518018	0.288889	-0.780952
POLL|27343	-0.223889	-0.384409	-0.366477	-0.0901786	0.227964	-0.128235	0.0772947	0.17193	0.336842	0.0045045	0.164444	-0.771429
TCF25|22980	-0.223055	-0.485215	-0.267045	0.0267857	0.0739615	-0.396471	-0.304348	0.0701754	0.0947368	-0.509009	0.208889	-0.55
KCNRG|283518	-0.163912	-0.254032	0.129261	-0.0428571	-0.14691	-0.131176	-0.0483092	-0.22807	-0.210526	-0.463964	0.146667	-0.385714
KIAA1797|54914	-0.177707	-0.225806	0.230114	-0.0875	-0.0496454	-0.263529	-0.193237	-0.221053	-0.284211	-0.202703	0.297778	-0.307143
WWP2|11060	-0.150769	0.0201613	0.130682	-0.133929	0.258359	-0.224706	-0.144928	-0.25614	0.105263	-0.466216	0.511111	-0.380952
NLRX1|79671	-0.222142	-0.194892	-0.184659	0.0392857	-0.126646	-0.392941	-0.289855	-0.547368	0.252632	-0.172297	0.0222222	-0.397619
KCTD11|147040	-0.0834341	-0.0551075	-0.0965909	0.0991071	-0.0577508	-0.178824	-0.140097	-0.294737	-0.0526316	-0.26464	0.0488889	-0.359524
GLTP|51228	-0.0397852	0.0094086	-0.03125	-0.0883929	0.0253293	-0.238824	-0.222222	-0.333333	0.0842105	-0.168356	0.306667	-0.0809524
KLHL9|55958	-0.0819895	-0.0860215	0.127841	0.06875	-0.138804	-0.277647	-0.0966184	-0.0842105	-0.252632	0.236486	0.111111	-0.535714
DACH1|1602	-0.116527	0.0846774	-0.166193	-0.0973214	-0.035461	-0.161176	0.135266	-0.0736842	-0.221053	0.0135135	0.413333	-0.245238
LARP4B|23185	-0.0590429	0.0954301	0.444602	-0.21875	-0.104357	0.0682353	0.0724638	0.185965	0.178947	-0.0867117	0.155556	-0.607143
FBXO18|84893	-0.00288932	-0.00672043	0.288352	-0.178571	-0.136778	-0.114118	0.0676329	-0.0385965	0.178947	-0.0551802	0.546667	-0.609524
ATP6V1B2|526	-0.231354	-0.302419	-0.43608	-0.488393	-0.311044	-0.317647	-0.236715	-0.175439	-0.6	0.0743243	-0.0488889	-0.290476
PPP2R2A|5520	-0.120693	-0.077957	-0.34375	-0.564286	-0.223911	-0.0482353	-0.0966184	-0.333333	-0.568421	0.0574324	-0.128889	-0.0738095
TMEM66|51669	-0.220354	-0.302419	-0.484375	-0.458036	-0.438703	-0.249412	-0.00483092	-0.185965	-0.6	-0.36036	0.217778	-0.00714286
AMPD3|272	-0.240062	-0.392473	-0.396307	-0.340179	-0.51773	-0.237647	-0.135266	-0.077193	-0.442105	-0.131757	0.0933333	0.0880952
CCDC25|55246	-0.209368	-0.202957	-0.62358	-0.461607	-0.507599	-0.117647	0.135266	-0.249123	-0.526316	0.00337838	0.12	0.0714286
ENTPD4|9583	-0.228538	-0.0241935	-0.447443	-0.452679	-0.327254	-0.0541176	0.125604	-0.37193	-0.242105	-0.0968468	0.04	-0.0642857
PTK2B|2185	-0.211673	-0.446237	-0.382102	-0.296429	-0.244174	-0.265882	-0.584541	-0.224561	-0.284211	-0.0236486	-0.182222	0.228571
TRIM35|23087	-0.159181	-0.31586	-0.335227	-0.429464	-0.513678	-0.237647	-0.275362	-0.354386	-0.231579	-0.221847	-0.28	-0.0690476
KCTD9|54793	-0.0986534	-0.251344	-0.37642	-0.300893	-0.367781	-0.0788235	-0.154589	-0.42807	-0.105263	-0.0326577	-0.137778	0.0904762
TLR3|7098	-0.244947	-0.612903	-0.275568	-0.3125	-0.130699	-0.329412	-0.0434783	-0.42807	-0.442105	0.0844595	0.0133333	0.247619
C1orf186|440712	-0.20627	-0.461022	-0.18892	0.133929	-0.0861196	-0.221765	0.00724638	-0.257895	-0.157895	0.0912162	-0.177778	0.0047619
DTHD1|401124	-0.29035	-0.426075	-0.193182	-0.259375	-0.0192503	-0.521176	-0.396135	-0.0280702	-0.536842	-0.248311	0.182222	0.121429
LPXN|9404	-0.231703	-0.43414	-0.31108	-0.0410714	-0.179331	-0.395294	-0.285024	-0.0421053	-0.526316	-0.238739	0.0488889	0.247619
SNX20|124460	-0.258923	-0.450269	-0.15483	-0.286607	-0.329281	-0.467059	-0.198068	0.147368	-0.526316	-0.122748	0.368889	-0.159524
TAGAP|117289	-0.206983	-0.501344	-0.230114	-0.224107	-0.262411	-0.428235	-0.169082	0.0842105	-0.368421	-0.0934685	0.191111	-0.0428571
KIAA0748|9840	-0.209765	-0.438172	-0.207386	-0.303571	-0.37386	-0.381176	-0.149758	0.0912281	-0.347368	-0.0990991	0.244444	0.0309524
P2RY10|27334	-0.186495	-0.400538	-0.078125	-0.38125	-0.298886	-0.403529	-0.169082	0.14386	-0.442105	-0.0236486	0.351111	0.145238
THEMIS|387357	-0.189035	-0.377688	-0.0610795	-0.329464	-0.337386	-0.383529	-0.135266	0.0421053	-0.452632	-0.178491	0.106667	0.0130952
CCR4|1233	-0.16494	-0.491263	-0.071733	-0.428571	-0.237082	-0.321176	-0.120773	0.0280702	-0.389474	-0.101914	0.155556	0.107143
GPR174|84636	-0.161896	-0.393145	-0.0809659	-0.3	-0.282675	-0.385294	-0.149758	-0.0315789	-0.357895	-0.0608108	0.222222	0.122619
PARP8|79668	-0.292009	-0.611559	-0.122159	-0.245536	-0.473151	-0.112941	-0.2657	-0.0877193	-0.157895	-0.149775	0.102222	-0.428571
CDC42SE2|56990	-0.305764	-0.443548	-0.302557	-0.308929	-0.529889	-0.24	0.00966184	0.2	-0.115789	0.0743243	-0.0933333	-0.261905
KLRK1|22914	-0.245901	-0.275538	-0.21733	-0.266964	-0.286727	-0.504706	-0.294686	0.0105263	-0.273684	-0.119369	0.191111	-0.269048
FASLG|356	-0.224668	-0.239247	-0.258523	-0.261607	-0.236069	-0.518824	-0.0917874	-0.105263	-0.273684	-0.193131	0.0755556	-0.0142857
NLRC3|197358	-0.289886	-0.397849	-0.210227	-0.34375	-0.347518	-0.5	-0.227053	-0.0982456	-0.263158	-0.129505	0.12	0
CLNK|116449	-0.182854	-0.379704	-0.0568182	-0.373661	-0.308004	-0.351765	0.00966184	0.0105263	-0.152632	-0.0112613	0.182222	-0.220238
PRKCQ|5588	-0.246627	-0.346774	-0.0667614	-0.242857	-0.276596	-0.225882	-0.231884	0.0350877	-0.242105	0.0777027	0.0222222	-0.152381
IL5RA|3568	-0.230547	-0.284274	-0.12642	-0.392857	-0.189463	-0.122941	-0.164251	-0.142105	-0.147368	-0.11036	-0.00444444	-0.0666667
TNIP1|10318	-0.241883	-0.567204	-0.416193	-0.371429	-0.240122	-0.234118	-0.130435	0.147368	-0.231579	-0.0867117	0.04	-0.00714286
CNR2|1269	-0.162507	-0.565188	-0.185369	-0.233036	-0.195542	-0.351176	-0.15942	-0.112281	-0.189474	-0.0551802	-0.0222222	0.0452381
CTSB|1508	-0.168091	-0.337366	-0.424716	-0.14375	-0.238095	-0.323529	0.294686	0.2	-0.389474	-0.167793	-0.0577778	0.240476
TXNDC3|51314	-0.185521	-0.30914	-0.254972	-0.0754464	-0.372847	-0.217647	-0.169082	0.12807	-0.315789	-0.260698	-0.182222	0.239286
PIGR|5284	-0.250907	-0.348118	-0.170455	-0.215179	-0.130699	-0.292941	0.057971	0.077193	-0.157895	-0.402027	-0.0711111	0.254762
TIFAB|497189	-0.195002	-0.422043	-0.0369318	-0.198214	-0.280648	-0.402353	-0.0821256	0.287719	-0.442105	-0.13964	-0.0266667	0.0714286
MYBPC2|4606	-0.226106	-0.461022	-0.0980114	-0.153571	-0.309017	-0.389412	0.0507246	0.261404	-0.263158	-0.231982	-0.106667	0.255952
C5orf20|140947	-0.216255	-0.428091	-0.105114	-0.240179	-0.339412	-0.370588	-0.144928	0.189474	-0.168421	-0.220158	-0.0844444	0.0190476
GPR18|2841	-0.246089	-0.40793	-0.0213068	-0.261607	-0.256332	-0.422353	-0.164251	-0.0280702	-0.410526	-0.247185	-0.0311111	0.380952
CCR2|729230	-0.186952	-0.349462	-0.00852273	-0.305357	-0.258359	-0.242353	-0.207729	0.129825	-0.357895	-0.175113	-0.0844444	0.27619
SPN|6693	-0.227759	-0.442204	-0.109375	-0.229464	-0.349544	-0.454118	-0.26087	0.0982456	-0.494737	-0.131757	0.137778	0.490476
CD52|1043	-0.18966	-0.392473	-0.117898	-0.120536	-0.167173	-0.38	-0.376812	0.0596491	-0.378947	-0.147523	0.12	0.37619
ITGAL|3683	-0.236172	-0.383065	-0.0994318	-0.24375	-0.256332	-0.469412	-0.188406	0.133333	-0.421053	-0.288288	0.28	0.311905
CCR5|1234	-0.19945	-0.306452	-0.0767045	-0.291964	-0.262411	-0.502353	-0.144928	0.133333	-0.421053	-0.224099	0.0311111	0.35
CD2|914	-0.204187	-0.341398	-0.120739	-0.324107	-0.205674	-0.474118	-0.135266	0.178947	-0.326316	-0.163288	0.164444	0.421429
CD3E|916	-0.207856	-0.358871	-0.143466	-0.344643	-0.191489	-0.472941	-0.222222	0.150877	-0.315789	-0.208333	0.0844444	0.314286
CD40LG|959	-0.195399	-0.38172	-0.0887784	-0.402679	-0.266464	-0.314118	0.0772947	0.115789	-0.368421	-0.0045045	0.142222	0.421429
UBASH3A|53347	-0.225132	-0.399194	-0.150568	-0.35	-0.234043	-0.488235	-0.0193237	0.0491228	-0.336842	-0.132883	0.102222	0.35
CD5|921	-0.231387	-0.341398	-0.0909091	-0.423214	-0.238095	-0.411765	0.0144928	0.108772	-0.315789	-0.176802	0.0133333	0.32381
GZMK|3003	-0.21471	-0.216398	-0.143466	-0.391071	-0.242148	-0.425882	-0.198068	0.0140351	-0.326316	-0.0833333	0.164444	0.316667
CXCR3|2833	-0.233155	-0.280914	-0.136364	-0.317857	-0.1692	-0.381176	-0.0241546	0.105263	-0.305263	-0.150901	0.128889	0.411905
CXCR6|10663	-0.197334	-0.306452	-0.113636	-0.390179	-0.157042	-0.483529	-0.057971	0.0210526	-0.294737	-0.156532	0.253333	0.388095
SIT1|27240	-0.207104	-0.282258	-0.200284	-0.340179	-0.225937	-0.391765	-0.120773	0.189474	-0.210526	-0.195946	-0.00444444	0.528571
CD6|923	-0.198409	-0.31586	-0.0411932	-0.353571	-0.262411	-0.432941	-0.140097	0.136842	-0.136842	-0.14527	0.04	0.540476
CD3G|917	-0.163757	-0.379032	-0.0965909	-0.371429	-0.266464	-0.512941	-0.0772947	0.224561	-0.484211	-0.00788288	-0.0622222	0.35
CCR8|1237	-0.106938	-0.362231	0.024858	-0.363393	-0.0121581	-0.342353	-0.0338164	0.189474	-0.410526	-0.0332207	0.0844444	0.114286
SLFN12L|342615	-0.0822986	-0.225806	0.0213068	-0.392857	-0.120567	-0.428235	-0.0966184	0.154386	-0.389474	0.115991	0.102222	0.345238
CXCR5|643	-0.207964	-0.408602	-0.0255682	-0.342857	-0.219858	-0.388235	-0.207729	0.077193	-0.178947	-0.0281532	-0.146667	0.154762
CFLAR|8837	-0.0916788	-0.291667	-0.119318	-0.358036	-0.278622	-0.284706	-0.21256	0.224561	-0.147368	0.0990991	-0.102222	0.216667
MAP4K1|11184	-0.185145	-0.369624	-0.0355114	-0.333036	-0.173252	-0.395294	-0.169082	0.178947	-0.284211	0.269144	0.155556	0.257143
TBC1D10C|374403	-0.221792	-0.41129	-0.174716	-0.296429	-0.150963	-0.483529	-0.135266	0.0561404	-0.147368	0.239865	0.128889	0.230952
GPR171|29909	-0.208757	-0.34543	-0.109375	-0.275893	-0.144883	-0.497647	-0.246377	-0.0982456	-0.221053	-0.00281532	0.2	0.314286
LTB|4050	-0.216685	-0.352151	-0.15767	-0.21875	-0.179331	-0.356471	-0.0917874	0.0807018	-0.210526	0.00900901	0.146667	0.330952
RNF144B|255488	-0.163038	-0.158602	-0.173295	-0.257143	0.0192503	-0.36	-0.246377	0.115789	-0.410526	-0.148649	0.271111	0.0190476
SLAMF7|57823	-0.11263	-0.11828	-0.0525568	-0.0839286	-0.118541	-0.285882	-0.285024	0.0947368	-0.231579	-0.177928	0.155556	0.207143
ZNF831|128611	-0.205457	-0.392473	-0.0617898	-0.370536	-0.232016	-0.488235	-0.0869565	0.0245614	-0.273684	-0.0929054	0.191111	0.00238095
LY9|4063	-0.170745	-0.295699	-0.0440341	-0.247321	-0.171226	-0.376471	-0.0434783	0.0421053	-0.252632	-0.126689	0.111111	0.130952
GZMM|3004	-0.201621	-0.258065	-0.129972	-0.372321	-0.236069	-0.42	-0.0483092	0.0631579	-0.242105	-0.131757	0.164444	0.135714
PTPRCAP|5790	-0.220381	-0.325269	-0.143466	-0.315179	-0.142857	-0.405882	-0.135266	0.0982456	-0.157895	-0.220721	0.226667	0.0428571
CD27|939	-0.207292	-0.267473	-0.0752841	-0.355357	-0.128673	-0.341176	-0.125604	0.185965	-0.326316	-0.221847	0.111111	0.180952
CD3D|915	-0.184748	-0.314516	-0.193182	-0.340179	-0.179331	-0.42	-0.0869565	0.2	-0.221053	-0.227477	0.128889	0.253571
GZMH|2999	-0.18704	-0.231183	-0.183239	-0.316071	-0.219858	-0.491765	-0.193237	0.157895	-0.147368	-0.246622	0.12	0.355952
PDCD1|5133	-0.182229	-0.143817	-0.117898	-0.290179	-0.0982776	-0.482353	-0.0193237	0.249123	-0.189474	-0.154279	0.244444	0.302381
CD48|962	-0.157784	-0.366935	-0.0411932	-0.222321	-0.300912	-0.407059	-0.217391	0.210526	-0.178947	-0.149775	0.173333	0.307143
ACAP1|9744	-0.219279	-0.428763	-0.151989	-0.213393	-0.1692	-0.469412	-0.309179	0.157895	-0.147368	-0.269144	0.235556	0.235714
CNDP2|55748	-0.248307	-0.317204	-0.0568182	-0.0267857	-0.242148	-0.532941	-0.00483092	-0.14386	-0.557895	-0.380631	0.644444	0.338095
SIGLEC1|6614	-0.0374671	-0.341398	-0.103693	0.0696429	0.0455927	-0.295294	-0.111111	0.245614	-0.578947	0.296171	0.52	0.1
CD163|9332	-0.00061818	-0.331989	0.0113636	-0.0669643	-0.258359	-0.194118	-0.144928	0.105263	-0.578947	0.0146396	0.493333	0.114286
MS4A7|58475	-0.0346046	-0.418011	0.0227273	-0.0160714	-0.238095	-0.334118	-0.154589	0.0736842	-0.589474	-0.0427928	0.591111	0.047619
MS4A4A|51338	-0.0281944	-0.388441	-0.015625	0.0241071	-0.225937	-0.205882	-0.169082	0.133333	-0.473684	-0.0529279	0.608889	-0.0190476
MS4A6A|64231	-0.0483726	-0.422043	-0.0553977	-0.0830357	-0.266464	-0.275294	-0.0628019	0.22807	-0.378947	-0.118243	0.511111	0.214286
MPP1|4354	-0.0604607	-0.233871	-0.0823864	0.0794643	-0.25228	-0.209412	-0.299517	0.319298	-0.442105	0	0.235556	0.171429
LIME1|54923	-0.103666	-0.142473	-0.306818	-0.229464	0.108409	-0.198824	0.10628	-0.0280702	-0.284211	-0.0416667	0.146667	0.447619
GPR110|266977	-0.0907179	-0.200269	-0.267045	-0.229464	-0.00506586	0.0341176	0.144928	0.00350877	-0.263158	0.181306	0.288889	0.216667
CFTR|1080	-0.170947	-0.197581	-0.149858	-0.102679	0.108409	0.0176471	0.183575	-0.119298	-0.273684	-0.0884009	0.142222	0.254762
LCN2|3934	-0.141832	-0.267473	-0.132102	-0.163393	-0.0577508	0.105882	0.183575	-0.182456	-0.147368	-0.135135	0.0222222	0.0714286
SLPI|6590	-0.172365	-0.428763	-0.235795	-0.0723214	-0.144883	0.0929412	0.202899	-0.0666667	-0.168421	-0.149775	0.431111	0.0238095
AKR1A1|10327	-0.133258	-0.354839	-0.232955	-0.0633929	-0.0982776	-0.131765	0.193237	0.00350877	-0.0210526	-0.167793	0.288889	0.15
TMEM106A|113277	-0.109163	-0.13172	-0.122159	-0.266071	-0.264438	-0.270588	-0.149758	0.175439	-0.263158	0.109234	0.591111	0.27619
IL12B|3593	-0.0575042	-0.318548	-0.0127841	-0.125893	-0.0385005	-0.331765	0.0724638	0.0842105	-0.263158	0.165541	0.422222	0.230952
LYN|4067	-0.0844622	-0.267473	-0.183239	-0.303571	-0.136778	-0.328235	0.057971	0.214035	-0.0947368	0.208333	0.431111	0.309524
GMIP|51291	-0.117521	-0.313172	0.0667614	-0.302679	-0.047619	-0.224706	0.149758	-0.119298	-0.2	-0.0304054	0.582222	0.047619
MUC16|94025	-0.181987	0.00672043	-0.104403	-0.379464	-0.227964	-0.0411765	0.057971	0.150877	-0.442105	0.184685	0.324444	0.188095
WDR63|126820	-0.212782	-0.141801	-0.03125	-0.230357	-0.343465	-0.228824	-0.236715	-0.377193	-0.621053	-0.225225	0.315556	0.183333
IKZF2|22807	-0.190319	-0.0268817	-0.0582386	-0.36875	-0.0597771	-0.422353	-0.164251	-0.561404	-0.315789	-0.0495495	0.128889	0.00714286
FUT2|2524	-0.154558	-0.0376344	-0.196023	-0.110714	-0.108409	-0.0635294	0.0628019	-0.301754	-0.452632	-0.381757	0.342222	0.366667
PLEKHG7|440107	-0.25727	-0.236559	-0.169034	-0.100893	-0.18541	-0.101176	-0.0434783	-0.336842	-0.315789	-0.402027	0.204444	-0.145238
STX18|53407	-0.213265	-0.106183	-0.174716	0.00535714	-0.177305	-0.0211765	-0.057971	-0.105263	-0.410526	-0.370495	0.173333	0.116667
ATP9B|374868	-0.204053	-0.224462	-0.110795	-0.191964	-0.211753	-0.358824	-0.0338164	-0.498246	-0.463158	-0.629505	0.04	-0.0452381
CYP4X1|260293	-0.2423	-0.0510753	-0.375	-0.232143	-0.100304	-0.270588	0.0966184	-0.196491	-0.115789	-0.466216	0.111111	-0.109524
SORBS2|8470	-0.238577	-0.189516	-0.196023	-0.286607	-0.0678825	-0.231765	-0.00483092	-0.164912	-0.105263	-0.596847	0.2	0.0380952
CXCL17|284340	-0.196118	-0.0887097	-0.169034	-0.11875	0.130699	-0.155294	-0.0193237	-0.385965	-0.168421	-0.431306	0.0488889	0.0702381
C12orf74|338809	-0.235768	-0.221102	-0.161932	-0.163393	-0.319149	-0.171765	-0.190821	-0.154386	-0.194737	-0.365991	-0.0666667	-0.114286
ZNF385B|151126	-0.265602	-0.260753	-0.130682	-0.0151786	-0.487335	-0.265882	0.10628	-0.178947	-0.273684	-0.286036	-0.0666667	0.0738095
KIF13B|23303	-0.294388	-0.255376	-0.302557	-0.269643	-0.300912	-0.0764706	0.0386473	-0.515789	-0.442105	-0.632883	0.04	0.319048
C8orf79|57604	-0.205928	-0.127688	-0.434659	-0.23125	-0.37386	-0.169412	0.0193237	-0.424561	-0.389474	-0.390766	0.12	0.438095
INTS9|55756	-0.27935	-0.397849	-0.535511	-0.415179	-0.278622	-0.0741176	0.154589	-0.519298	-0.273684	-0.412162	0.235556	0.254762
ADAM28|10863	-0.307934	-0.428763	-0.421875	-0.265179	-0.339412	-0.0458824	0.140097	-0.287719	-0.0421053	-0.516892	0.04	0.111905
SYTL3|94120	-0.22401	0.104839	-0.386364	-0.352679	-0.00911854	-0.3	-0.15942	-0.0912281	-0.189474	-0.382883	0.173333	0.528571
NAT1|9	-0.165894	-0.108871	-0.332386	-0.317857	-0.0618034	-0.181176	0.0628019	-0.484211	-0.252632	-0.154279	0.351111	0.107143
UBXN8|7993	-0.067395	-0.27957	-0.357955	-0.2125	-0.0942249	0.0705882	0.193237	-0.333333	-0.252632	-0.247748	0.244444	0.245238
TNFRSF10B|8795	-0.151911	-0.143817	-0.4375	-0.390179	-0.134752	-0.110588	0.101449	-0.287719	-0.0421053	-0.425676	0.502222	0.264286
GTF2E2|2961	-0.116393	-0.0833333	-0.534091	-0.319643	-0.142857	0.0282353	0.0869565	0.0280702	-0.136842	-0.158784	0.164444	0.171429
BIN3|55909	-0.184056	-0.197581	-0.609375	-0.407143	-0.122594	-0.0352941	0.0483092	-0.175439	0.0631579	-0.260135	0.253333	0.27381
SQRDL|58472	-0.117387	-0.428763	-0.0340909	0.130357	-0.100304	-0.303529	-0.502415	-0.150877	-0.178947	-0.308559	-0.2	0.402381
MBD2|8932	-0.0795839	-0.208333	-0.237216	0.0526786	-0.0597771	-0.451765	-0.458937	-0.270175	-0.2	-0.177928	0.191111	0.521429
MKNK2|2872	-0.183841	-0.375	-0.0681818	-0.075	-0.187437	-0.341176	-0.357488	-0.252632	-0.0947368	-0.382883	0.182222	0.290476
RPS6KA1|6195	-0.192388	-0.192204	-0.200284	0.0973214	0.00506586	-0.409412	-0.115942	-0.175439	0.0631579	-0.244369	0.262222	0.32619
PAM|5066	-0.216323	-0.413978	-0.288352	0.0785714	-0.00101317	-0.22	-0.169082	-0.2	-0.105263	-0.441441	0.235556	-0.0309524
SYTL1|84958	-0.140246	-0.427419	-0.34517	0.00357143	0.14691	-0.142353	-0.246377	-0.312281	0.136842	-0.405405	0.0577778	0.366667
PLEKHA2|59339	-0.102954	-0.25672	-0.339489	-0.191964	-0.104357	-0.295294	-0.333333	-0.25614	-0.273684	0.368243	0.12	0.438095
CASP1|834	-0.0762243	-0.541667	-0.355114	-0.235714	-0.0658561	-0.58	-0.256039	-0.185965	0.0842105	0.272523	0.226667	0.452381
CARD16|114769	-0.0716014	-0.331989	-0.463068	-0.19375	-0.0212766	-0.398824	-0.202899	-0.0280702	0	0.088964	0.0933333	0.597619
C16orf54|283897	-0.233054	-0.407258	-0.443182	-0.153571	-0.321175	-0.471765	-0.202899	-0.185965	-0.326316	-0.0382883	0.244444	0.297619
KLRB1|3820	-0.21768	-0.430108	-0.159091	-0.323214	-0.278622	-0.422353	-0.0193237	-0.133333	-0.263158	-0.192568	0.404444	0.230952
IL2RB|3560	-0.194525	-0.237903	-0.180398	-0.252679	-0.260385	-0.491765	-0.120773	-0.0842105	-0.105263	-0.113739	0.413333	0.25
FCRL6|343413	-0.241426	-0.373656	-0.139205	-0.250893	-0.383992	-0.495294	-0.338164	-0.0947368	-0.147368	-0.113739	0.386667	0.371429
TNFRSF10A|8797	-0.13604	-0.177419	-0.224432	-0.477679	-0.0638298	-0.36	-0.188406	-0.175439	-0.210526	-0.22973	0.377778	0.183333
CLIC5|53405	-0.276165	-0.34543	-0.276989	-0.258929	-0.248227	-0.248235	-0.0531401	0.0666667	-0.294737	-0.318694	0.493333	0.230952
RASAL3|64926	-0.235876	-0.397849	-0.231534	-0.277679	-0.26849	-0.464706	-0.149758	0.0842105	-0.189474	-0.306306	0.386667	0.195238
STAT4|6775	-0.179863	-0.336022	-0.356534	-0.125	-0.191489	-0.503529	-0.285024	0.0736842	-0.189474	-0.115991	0.591111	0.0857143
FUT10|84750	-0.206727	-0.205645	-0.333807	-0.436607	-0.400203	-0.335294	0.26087	-0.0526316	-0.242105	-0.21509	0.368889	0.152381
SYK|6850	-0.237623	-0.44086	-0.477273	-0.175893	-0.0739615	-0.485882	0.0483092	-0.25614	-0.0736842	-0.263514	0.431111	0.111905
SERPINB1|1992	-0.146589	-0.349462	-0.190341	-0.154464	-0.39615	-0.1	-0.21256	-0.00701754	-0.136842	-0.212838	0.226667	0.364286
ITGB7|3695	-0.246372	-0.356183	-0.427557	-0.270536	-0.0840932	-0.392941	-0.115942	0.126316	-0.0736842	-0.163288	0.137778	0.340476
SEPT1|1731	-0.219669	-0.400538	-0.261364	-0.35	-0.223911	-0.394118	-0.202899	0.108772	-0.0105263	-0.103604	0.191111	0.266667
S1PR4|8698	-0.227692	-0.469086	-0.269886	-0.30625	-0.183384	-0.363529	-0.217391	-0.0210526	0.0105263	-0.22241	0.28	0.146429
TOM1|10043	-0.242111	-0.297043	-0.194602	0.0625	-0.122594	0.00235294	-0.507246	-0.0175439	-0.105263	-0.606982	0.466667	-0.140476
C8orf58|541565	-0.116325	0.0349462	-0.484375	-0.0616071	-0.114488	-0.0882353	-0.323671	-0.336842	-0.157895	-0.333333	0.44	-0.0190476
POLR3D|661	-0.101455	-0.0752688	-0.450284	-0.364732	-0.136778	-0.0576471	0.057971	0.0245614	0.210526	-0.150901	0.271111	-0.202381
NUDT18|79873	-0.263761	-0.337366	-0.569602	-0.299107	-0.284701	-0.138824	-0.21256	0.126316	0.0526316	-0.335586	0.28	-0.145238
MON1B|22879	-0.221127	-0.233871	-0.120739	-0.144643	-0.0618034	-0.343529	-0.0144928	-0.112281	0.368421	-0.655405	0.342222	-0.154762
STX19|415117	-0.235379	0.0094086	-0.289773	-0.153571	0.12462	-0.241176	0.231884	-0.25614	0.273684	-0.578829	0.0133333	0.104762
PSMB10|5699	-0.171263	-0.388441	-0.409091	-0.132143	0.12462	-0.376471	-0.183575	0.224561	0.273684	-0.184685	0.368889	0.257143
NOXO1|124056	-0.149183	-0.196237	-0.380682	-0.235714	0.029382	-0.384706	-0.164251	0.0245614	0.347368	-0.0596847	0.0977778	0.297619
CYBA|1535	-0.167419	-0.490591	-0.203125	-0.0821429	-0.114488	-0.214118	-0.0628019	0.0385965	0.273684	-0.286036	0.431111	0.197619
C10orf95|79946	-0.210369	-0.302419	-0.0951705	-0.0883929	0.236069	-0.242353	0.0338164	-0.0947368	0.252632	-0.198198	0.12	0.135714
C9orf171|389799	-0.0897839	-0.182124	0.113636	0.0785714	-0.00911854	0.122941	0.0748792	0.147368	0	-0.210586	0.0666667	0.157143
CIB1|10519	-0.108907	-0.0793011	-0.181818	0.0633929	-0.0739615	0.0941176	0.0144928	0.0245614	0.0105263	-0.43018	0.173333	0.0714286
CCDC64B|146439	-0.105373	-0.107527	0.119318	-0.128571	0.148936	-0.0729412	0.0676329	-0.536842	0.221053	-0.266892	-0.0311111	-0.216667
CHMP4C|92421	-0.0118664	0.0698925	0.242898	-0.0651786	-0.0212766	0.111765	0.0193237	-0.273684	0.178947	0.184685	0.288889	0.607143
TMED6|146456	-0.0877211	-0.0577957	0.0539773	0.395536	-0.0405268	-0.134118	0.0338164	-0.0140351	0.157895	-0.557432	0.262222	0.314286
C2orf39|92749	-0.0604136	-0.155914	-0.0887784	-0.0660714	-0.0151976	0.292353	-0.173913	0.152632	-0.278947	-0.126689	0.426667	0.416667
C6orf118|168090	-0.112495	0.0120968	-0.110085	-0.0803571	-0.131712	0.215882	0.178744	-0.294737	-0.221053	-0.197072	0.00444444	0.630952
C1orf172|126695	-0.00979681	0.326613	0.0667614	0.257589	0.0840932	-0.0788235	0.111111	-0.449123	0.284211	0.0833333	-0.12	0.0178571
C17orf72|92340	-0.105749	-0.0887097	-0.0639205	-0.197321	-0.120567	-0.00941176	0.0917874	0.129825	-0.4	-0.150901	0.662222	0.404762
WRN|7486	-0.102551	-0.0846774	-0.349432	-0.472321	-0.361702	-0.0564706	0.0869565	-0.263158	-0.105263	-0.105856	-0.342222	0.42381
KIAA1751|85452	-0.0555892	0.0584677	0.215199	0.320536	0.164134	0.192941	-0.108696	0	-0.0842105	-0.152027	-0.111111	-0.363095
ELF3|1999	-0.0339461	0.133065	0.0596591	-0.133929	-0.10233	0.288235	0.275362	-0.119298	0.315789	-0.0101351	-0.235556	0.302381
SEPP1|6414	-0.0585793	-0.275538	-0.207386	-0.275	0.0577508	0.0835294	0.0144928	-0.508772	0.231579	0.334459	0.751111	0.0452381
CLDN7|1366	-0.0707547	-0.00672043	0.18892	-0.108036	0.035461	-0.0635294	0.251208	-0.336842	0.294737	0.164414	0.44	0.133333
INTS10|55174	-0.202467	-0.114247	-0.511364	-0.319643	-0.390071	-0.107059	0.154589	-0.105263	-0.210526	-0.231982	-0.342222	0.283333
C20orf151|140893	-0.0524378	0.162634	0.178977	-0.0723214	0.377913	0.244706	0.0966184	-0.0526316	-0.0315789	-0.0461712	0	0.0416667
MUC20|200958	-0.0805515	-0.205645	-0.129261	-0.161607	0.179331	0.0494118	0.0193237	-0.133333	0.0526316	0.356982	-0.191111	0.32381
PLA2G4D|283748	-0.0079893	-0.102151	0.0454545	0.0160714	-0.108409	0.249412	0.057971	-0.133333	0.0526316	-0.0602477	0.0133333	0.122619
DUSP6|1848	-0.0123098	0.0887097	0.122159	0.0276786	0.047619	0.3	-0.31401	0.147368	-0.147368	-0.623874	0.368889	0.395238
ALOX12B|242	-0.00811025	0.112903	-0.0553977	0.0151786	0.0202634	0.188824	-0.115942	-0.25614	-0.0210526	0.365991	-0.248889	-0.521429
CTTNBP2NL|55917	-0.0198086	0.0107527	0.174716	-0.283929	-0.215805	-0.122353	-0.202899	-0.389474	-0.515789	0.195946	0.146667	0.4
PRSS8|5652	-0.14292	0.267473	0.129261	0.138393	0.0759878	0.00235294	0.154589	-0.238596	0.189474	-0.0709459	-0.137778	0.239286
CLDN4|1364	-0.0520615	0.125	0.125	-0.110714	-0.0314083	0.150588	0.0724638	0.129825	-0.0736842	0.0900901	0.653333	0.35
RAB36|9609	-0.0420228	0.13172	-0.340909	-0.158929	-0.339412	0.0964706	0.188406	0.266667	0.326316	-0.236486	0.0222222	0.688095
CNOT7|29883	-0.164154	0.0120968	-0.326705	-0.442857	-0.444782	-0.128235	0.193237	-0.266667	-0.126316	0.0292793	-0.395556	0.204762
PRSS22|64063	-0.0732812	0.141129	-0.18608	-0.0946429	0.148936	0.0917647	-0.00483092	-0.259649	-0.0315789	-0.155405	0.146667	0.0297619
TCTEX1D4|343521	-0.121311	0.0255376	-0.201705	-0.113393	-0.177305	-0.105882	-0.0483092	-0.0912281	0.157895	-0.162725	-0.173333	0.239286
SCNN1A|6337	-0.129428	0.0134409	0.0639205	-0.140179	-0.209726	0.349412	0.111111	-0.347368	-0.0210526	0.182432	-0.564444	0.269048
TMEM184A|202915	-0.0278584	0.0954301	0.0369318	-0.0125	0.106383	0.32	0.0821256	-0.357895	0.168421	-0.123874	0.2	-0.111905
CBLC|23624	-0.0216766	0.0725806	0.0909091	-0.01875	-0.126646	-0.0211765	-0.0289855	-0.0385965	0.0947368	0.103604	-0.4	0.0892857
RTDR1|27156	-0.0889104	-0.00537634	-0.0859375	0.0375	-0.0374873	0.208235	-0.26087	0.0561404	0.431579	-0.216216	-0.351111	0.333333
ST14|6768	-0.1199	0.294355	0.0184659	-0.146429	-0.0638298	-0.185882	0.0386473	-0.340351	0.0421053	-0.0168919	0.36	0.202381
CNKSR1|10256	-0.0271193	0.192204	0.0539773	0.264286	0.284701	0.0105882	0.00483092	-0.273684	0.0526316	0.0157658	0.244444	0.130952
ARSD|414	-0.15351	-0.244624	-0.078125	0.0669643	-0.0577508	0.0423529	0.15942	-0.115789	-0.0631579	-0.527027	-0.626667	0.583333
CCDC6|8030	-0.141543	-0.0672043	-0.137784	-0.0517857	-0.0435664	-0.18	-0.0289855	-0.112281	-0.189474	0.618243	-0.466667	-0.342857
AP1M2|10053	-0.0553069	0.0766129	0.28267	-0.00178571	0.327254	0.184706	0.285024	-0.164912	0.2	-0.135135	-0.182222	0.136905
STT3A|3703	-0.0586599	0.248656	0.237216	-0.361607	-0.246201	0.117647	0.10628	-0.277193	-0.252632	-0.171171	0.271111	0.230952
C7orf23|79161	-0.00134387	-0.318548	0.0383523	-0.116964	-0.428571	0.307059	-0.0724638	0.189474	0.0736842	0.152027	0.386667	0.157143
C1orf210|149466	-0.11689	-0.047043	0.259943	-0.00803571	-0.173252	-0.0247059	0.275362	-0.0315789	0.136842	0.336712	0.0933333	0.261905
CSDE1|7812	-0.0260845	0.0228495	-0.0340909	-0.132143	-0.39615	-0.123529	-0.217391	-0.00701754	-0.505263	0.447072	-0.315556	0.195238
C2orf54|79919	-0.13307	0.125	-0.0553977	-0.266071	-0.0597771	-0.112941	-0.2657	-0.442105	0.0315789	0.277027	-0.0577778	0.12381
TTLL10|254173	-0.106549	-0.112903	0.0553977	-0.00580357	-0.144883	0	0.0338164	-0.512281	0.0105263	-0.152027	0.435556	0.304762
PRRG2|5639	-0.100831	-0.0255376	0.0852273	-0.0875	-0.0820669	0.132941	0.101449	-0.175439	-0.0526316	-0.146396	0.386667	0.690476
MAK16|84549	-0.069478	-0.120968	-0.3125	-0.44375	-0.26849	-0.0376471	0.0338164	-0.077193	-0.0421053	0.0506757	-0.351111	0.566667
RAB25|57111	-0.0895151	-0.103495	-0.0142045	0.0794643	0.142857	0.0705882	0.0386473	-0.470175	-0.0105263	-0.0281532	0.0977778	0.142857
OVOL2|58495	-0.0589152	0.180108	0.178267	0.08125	0.25228	0.00235294	0.31401	-0.0315789	-0.178947	-0.349099	-0.262222	-0.308333
SRPR|6734	-0.123838	0.127688	-0.0838068	-0.400893	-0.333333	0.0329412	0.120773	-0.368421	-0.115789	-0.186937	0.182222	0.538095
SPINT2|10653	-0.0309896	0.106183	0.369318	0.125	-0.0233029	0.148235	0.057971	0.0140351	0.178947	-0.140766	0.12	-0.107143
LSR|51599	-0.0237999	-0.0134409	0.332386	-0.05	0.181358	0.107059	0.193237	-0.0947368	0.294737	-0.129505	-0.00444444	0.264286
PDZK1IP1|10158	-0.143875	-0.448925	-0.0802557	-0.0928571	-0.219858	-0.127059	0.135266	0.0385965	0.0842105	-0.0495495	-0.626667	0.604762
NPM2|10361	-0.0825942	0.119624	-0.0184659	-0.176786	-0.0070922	0.282353	-0.00966184	-0.273684	0.242105	-0.349099	0.128889	-0.0714286
ERI1|90459	-0.0988281	-0.11828	-0.140625	-0.570536	-0.179331	-0.169412	0.198068	-0.382456	-0.431579	-0.173423	-0.217778	0.602381
PINX1|54984	-0.0538085	-0.157258	-0.241477	-0.184821	0.0334347	-0.0882353	0.0434783	0.0561404	-0.168421	0.102477	-0.422222	0.52381
SLC35E3|55508	0.0353438	0.0443548	0.319602	-0.0642857	-0.128673	0.130588	0.15942	-0.17193	0.189474	-0.162162	0.573333	-0.214286
KRT1|3848	0.00569801	0.0645161	-0.0539773	0.0892857	-0.0314083	-0.0676471	-0.147343	-0.301754	-0.536842	-0.0765766	-0.373333	-0.0595238
FCGR3A|2214	0.0169328	-0.318548	0.0170455	-0.0741071	-0.140831	-0.261176	-0.0869565	0.280702	-0.442105	-0.0574324	0.226667	0.488095
FCGR2A|2212	0.0078482	-0.370968	0.0340909	0.025	-0.327254	-0.227059	-0.101449	0.270175	-0.221053	-0.0382883	0.333333	0.388095
INSL3|3640	0.00450196	0.134409	-0.113636	-0.209821	-0.0455927	-0.0764706	0.10628	0.238596	-0.357895	0.458333	0.168889	-0.0714286
C20orf106|200232	0.0483524	-0.288978	-0.181818	-0.0544643	0.158055	0.0564706	0.198068	-0.0561404	-0.178947	0.0703829	0.262222	-0.303571
C2orf74|339804	0.0211659	-0.0456989	-0.0610795	0.217857	0.157042	-0.0494118	-0.178744	0.168421	0.0631579	-0.00675676	-0.635556	-0.109524
SLC39A2|29986	8.06322e-05	0.0215054	-0.106534	0.16875	0.114488	-0.192353	-0.229469	-0.501754	-0.105263	-0.0343468	-0.2	-0.0119048
MSR1|4481	0.0355521	-0.30914	0.0184659	0.0276786	-0.177305	-0.221176	-0.120773	0.0736842	-0.284211	0.0641892	0.466667	0.461905
LIPG|9388	0.0389453	-0.111559	0.389205	0.0375	-0.0577508	-0.241176	0.0144928	0.0385965	-0.452632	-0.0371622	0.271111	0.485714
PRSS27|83886	0.00106166	0.00672043	-0.15483	-0.201786	-0.00506586	0.0882353	-0.0531401	-0.414035	0.136842	-0.170045	-0.484444	0.00714286
MLH1|4292	0.143431	-0.158602	-0.00142045	-0.203571	-0.260385	0.423529	0.193237	0.308772	0	0.275901	-0.333333	0.209524
ASMT|438	0.0660781	-0.123656	-0.261364	-0.0732143	-0.0162107	0.140588	0.125604	0.189474	0.0947368	0.170045	-0.0444444	0.0321429
FZD7|8324	0.178493	-0.0645161	-0.0767045	0.0616071	-0.0577508	-0.0647059	0.130435	0.182456	0.0210526	0.347973	0.0133333	0.254762
GATAD1|57798	0.0221066	-0.114247	-0.0539773	0.309821	-0.197568	0.215294	0.00966184	0.00701754	0.168421	-0.28491	-0.36	0.409524
CTTN|2017	0.0311643	-0.063172	-0.0397727	0.33125	0.0739615	0.188235	0.149758	0.0842105	0.347368	-0.216216	-0.235556	0.216667
HIAT1|64645	0.0341208	0.0188172	0.00142045	0.0607143	-0.481256	-0.0964706	-0.0531401	0.0842105	-0.115789	0.179054	-0.191111	0.247619
RBMXL1|494115	0.010966	-0.0362903	0.0894886	-0.29375	-0.390071	-0.212941	0.0193237	0.0877193	-0.0947368	0.399775	-0.528889	0.097619
DR1|1810	0.0987341	0.114247	0.225852	0.0767857	-0.570415	-0.157647	-0.21256	0.00701754	-0.263158	0.449324	0.0755556	0.366667
ZNHIT6|54680	0.104775	0.168011	0.27983	-0.0392857	-0.448835	0.00352941	0.00483092	-0.0140351	-0.294737	0.413288	0.0577778	0.411905
CPVL|54504	0.0696259	-0.310484	0.119318	-0.177679	-0.191489	0.0717647	0	0.284211	-0.231579	0.48536	0.217778	0.409524
DPAGT1|1798	0.00149841	0.107527	0.285511	-0.178571	-0.100304	0.249412	0.26087	-0.108772	-0.0736842	0.102477	0.137778	0.333333
VKORC1L1|154807	0.127291	0.00134409	0.382102	0.0732143	-0.282675	0.338824	0.227053	0.182456	0.126316	0.329955	-0.0222222	0.121429
CRCP|27297	0.129791	0.00134409	0.25142	0.130357	-0.0395137	0.209412	0.178744	-0.136842	0.252632	0.210586	-0.431111	0.697619
ATAD2|29028	0.247433	0.212366	0.319602	0.0508929	0.211753	0.283529	0.0676329	-0.126316	-0.147368	0.381757	-0.466667	0.62381
MTBP|27085	0.27642	0.0967742	0.291193	0.165179	0.240122	0.276471	0.15942	-0.0210526	-0.115789	0.362613	-0.288889	0.680952
FTSJ2|29960	0.235016	0.0672043	0.150568	0.2125	0.104357	0.130588	0.0821256	-0.0421053	0.0526316	0.373874	-0.351111	0.607143
DHX35|60625	0.243979	0.123656	0.0880682	0.0723214	0.236069	0.274118	0.173913	0.108772	0.105263	0.452703	-0.306667	0.440476
ZNF772|400720	0.111514	0.116935	0.144886	0.103571	-0.177305	0.449412	0.202899	-0.0350877	-0.357895	0.426802	-0.324444	0.266667
TMEM194A|23306	0.270843	0.337366	0.21733	0.139286	-0.106383	0.391765	0.202899	0.126316	-0.273684	0.320946	-0.271111	0.695238
MAP7D3|79649	0.184177	-0.00537634	0.0440341	0.170536	-0.0780142	0.156471	-0.241546	0.140351	-0.2	0.626126	-0.564444	0.492857
ZNF311|282890	0.124879	0.0416667	-0.0482955	0.195982	0.0577508	0.169412	-0.202899	-0.291228	-0.105263	0.427365	-0.368889	0.552381
DEK|7913	0.120774	0.106183	0.12358	-0.0330357	-0.00101317	0.0929412	-0.0386473	0.280702	-0.368421	0.416667	-0.262222	0.497619
STAC|6769	0.12666	-0.18414	0.0241477	0.104464	-0.134752	0.0717647	-0.0144928	-0.0245614	-0.273684	0.394144	-0.111111	0.635714
CHEK1|1111	0.132499	0.244624	0.1875	-0.151786	0.0151976	-0.0905882	0.0241546	-0.22807	-0.315789	0.356982	-0.475556	0.721429
MCM6|4175	0.143807	0.111559	0.0880682	-0.0955357	0.197568	-0.128235	0.0966184	-0.154386	-0.126316	0.220721	-0.333333	0.740476
WDR76|79968	0.114908	-0.0147849	-0.0369318	0.0303571	0.0314083	-0.161176	-0.0289855	-0.263158	-0.210526	0.141892	-0.351111	0.535714
CHAF1A|10036	0.188941	0.15457	0.0298295	-0.09375	0.256332	-0.0705882	0.164251	0.0140351	-0.273684	-0.0810811	-0.244444	0.771429
PTN|5764	0.0799871	0.150538	0.278409	-0.0705357	0.223911	-0.255294	0.149758	-0.101754	-0.136842	-0.0472973	-0.12	0.72381
EGFR|1956	0.125934	0.235215	0.275568	0.170536	-0.0151976	0.111765	-0.0338164	-0.122807	-0.115789	-0.126126	-0.324444	0.611905
SUN1|23353	0.186805	0.262097	0.258523	0.276786	0.168186	0.114118	-0.0144928	-0.0947368	0.0947368	-0.168919	-0.235556	0.664286
SAE1|10055	0.254179	0.204301	0.291193	0.0767857	0.177305	0.129412	0.101449	-0.136842	-0.157895	-0.0292793	0.0488889	0.62381
TYW1|55253	0.196635	0.0456989	0.366477	0.0955357	-0.0334347	0.238824	0.0772947	0.0280702	-0.147368	0.036036	0.0133333	0.571429
FAF1|11124	0.203764	0.426075	-0.0170455	0.141071	-0.0172239	0.196471	-0.0241546	-0.0526316	-0.242105	0.0664414	-0.173333	0.77619
SHOX2|6474	0.271119	0.228495	-0.00284091	-0.200893	-0.0496454	0.285882	0.00966184	-0.147368	-0.0315789	0.0630631	-0.0133333	0.778571
CALU|813	0.158254	0.163978	0.160511	-0.0464286	-0.276596	0.0705882	0.256039	0.0421053	0.0842105	0.0123874	-0.0577778	0.769048
USP1|7398	0.16023	0.33871	0.09375	-0.05	-0.213779	0.06	0.149758	-0.178947	-0.221053	0.335586	-0.0844444	0.730952
SIKE1|80143	0.216054	0.302419	0.24858	0.06875	-0.191489	0.1	0.0144928	-0.0105263	0.0210526	0.381757	0.173333	0.666667
MSL1|339287	0.185199	0.231183	0.18608	0.124107	0.187437	0.341176	-0.0193237	0	0.147368	-0.0855856	0.0933333	-0.302381
SDF2|6388	0.183861	0.176075	0.521307	0.0741071	0.181358	0.387059	0.231884	-0.0350877	0.284211	-0.0912162	0.28	-0.0190476
GRHL2|79977	0.0261786	0.176075	0.113636	-0.00625	0.225937	0.14	0.0917874	-0.214035	0.136842	-0.275901	-0.12	0.421429
DIDO1|11083	0.105715	0.291667	-0.000710227	-0.133929	0.250253	0.285882	0.188406	0.0736842	-0.189474	0.0900901	-0.493333	0.154762
RTEL1|51750	0.0857926	0.318548	-0.0681818	0.00535714	0.331307	0.0364706	0.376812	0.0385965	-0.126316	-0.0394144	0.164444	0.17619
SBSN|374897	0.0973365	0.106183	0.015625	0.0955357	0.135765	0.321176	-0.202899	-0.249123	-0.105263	0.0343468	-0.0844444	0.15
CNFN|84518	0.0112616	0.251344	0.09375	-0.0169643	0.173252	0.216471	-0.173913	-0.375439	-0.157895	0.097973	0.36	0.383333
RNF222|643904	0.0172754	0.260753	-0.172585	0.0553571	0.0486322	0.00117647	-0.299517	-0.55614	-0.0736842	0.177365	-0.00444444	0.177381
ALOXE3|59344	0.0755658	-0.180108	0.102273	0.0982143	0.0273556	0.128235	-0.21256	-0.375439	0.189474	0.560811	0.222222	-0.271429
C10orf99|387695	0.00904424	-0.0678763	-0.0795455	0.119643	0.198582	0.156471	-0.444444	-0.359649	-0.0315789	0.277027	0.12	-0.142857
NCCRP1|342897	0.0457991	0.111559	0.12642	-0.129464	-0.0840932	0.24	-0.241546	-0.273684	-0.126316	0.385135	0.146667	-0.097619
DSG1|1828	0.0960934	-0.0685484	0.104403	0.105357	-0.100304	0.234118	-0.241546	-0.354386	0.136842	0.0106982	0.466667	-0.0357143
CCDC152|100129792	0.0382667	-0.305108	-0.255682	-0.202679	0.0131712	0.235294	0.10628	-0.221053	0.252632	0.403153	0.866667	0.333333
FRS2|10818	0.127869	0.353495	0.22017	-0.146429	-0.302938	0.274118	0.26087	-0.112281	-0.105263	0.30518	0.644444	-0.269048
CNOT2|4848	0.153631	0.232527	0.00852273	0.159821	-0.161094	0.251765	0.202899	-0.382456	-0.0105263	0.333333	0.52	-0.216667
CTDSP2|10106	0.061052	0.125	-0.269886	-0.194643	-0.412361	0.0670588	0.304348	-0.161404	-0.252632	0.505631	0.768889	0.219048
MARCKS|4082	0.174206	-0.0295699	0.00852273	0.392857	-0.128673	0.0117647	-0.0724638	0.242105	0.0842105	0.0506757	0.786667	-0.340476
CUZD1|50624	0.108847	0.0725806	-0.0724432	0.124107	0.167173	-0.0470588	0.111111	-0.0912281	0.252632	0.218468	0.706667	-0.42619
FAM24B|196792	0.144325	-0.094086	-0.0539773	0.241071	0.260385	0.178824	-0.0338164	0.0877193	0.410526	0.367117	0.68	-0.240476
ISPD|729920	0.14796	0.11828	-0.130682	0.219643	0.132725	0.194118	-0.0676329	-0.0280702	0.284211	0.369369	0.324444	-0.114286
OLAH|55301	0.100481	0.0564516	0.109375	-0.0316964	0.0070922	0.06	-0.0289855	0.154386	0.252632	0.300113	0.368889	-0.0809524
HORMAD1|84072	0.0985123	-0.0329301	0.037642	0.0169643	0.10233	-0.0270588	-0.188406	0.0175439	0.484211	0.0974099	0.382222	0.188095
C10orf125|282969	0.0371042	-0.094086	0.0411932	0.0410714	0.136778	-0.08	-0.391304	0.378947	0.389474	0.55518	0.573333	-0.0119048
CNTFR|1271	0.11476	-0.0389785	0.0724432	0.24375	0.270517	0.0623529	-0.0338164	0.00701754	-0.0526316	0.338964	0.324444	-0.180952
PNPLA1|285848	0.16023	-0.0443548	0.0127841	0.13125	0.225937	0.195294	-0.0483092	-0.0666667	-0.105263	0.190878	0.16	0.108333
STMN1|3925	0.17639	0.221774	0.18892	0.291964	0.343465	0.125882	0.0724638	-0.136842	-0.0210526	0.222973	0.626667	0.154762
ADRA2B|151	0.184036	0.133065	0.112216	0.183929	0.165147	0.111765	0.444444	0.2	-0.126316	0.267455	0.448889	0.285714
TMEM203|94107	0.184083	-0.0927419	-0.125	0.2375	0.100304	0.163529	0.217391	0.529825	-0.0210526	0.289414	0.44	0.290476
FAM32A|26017	0.159275	-0.236559	-0.00426136	0.116071	0.236069	0.06	0.415459	0.277193	0.0842105	0.30518	0.28	-0.00714286
UCKL1|54963	0.279162	0.169355	0.275568	0.278571	0.499493	0.325882	0.497585	0.319298	0.0947368	0.197072	0.226667	0.0833333
ARFGAP1|55738	0.184036	0.319892	0.197443	0.182143	0.497467	0.210588	0.347826	0.161404	0.157895	-0.0292793	0.528889	0.0452381
TUBB|203068	0.244477	0.294355	0.252841	0.275	0.377913	0.0788235	0.144928	0.298246	0.0736842	0.22973	0.404444	0.204762
CCT2|10576	0.263445	0.127688	0.34517	-0.116071	-0.0334347	0.405882	0.275362	0.407018	0.273684	0.302928	0.413333	-0.0738095
YEATS4|8089	0.210436	0.149194	0.272727	0.0169643	-0.134752	0.235294	0.251208	0.147368	0.326316	0.240991	0.591111	-0.0428571
PDCD6|10016	0.137868	0.110215	0.149148	0.101786	0.140831	0.44	0.130435	0.192982	0.473684	0.197072	0.386667	0.0619048
TSFM|10102	0.204954	0.16129	0.0454545	0.189286	-0.118541	0.284706	0.386473	0.150877	0.494737	0.551802	0.617778	0.2
CDK4|1019	0.24785	0.301075	0.0497159	0.119643	0.0212766	0.291765	0.362319	0.252632	0.284211	0.198198	0.733333	0.261905
CDCA2|157313	0.073382	0.0819892	-0.0681818	-0.234821	-0.0739615	-0.00941176	0.0531401	-0.154386	-0.410526	0.262387	0.0488889	0.788095
ESRP2|80004	0.0015992	0.237903	0.125	-0.0651786	0.304965	-0.142353	0.00483092	-0.22807	0.0947368	-0.111486	0.324444	0.454762
MDM2|4193	0.00346718	0.00806452	-0.0198864	-0.141071	-0.444782	-0.124706	0.207729	-0.614035	-0.115789	-0.443694	0.742222	0.285714
C10orf114|399726	0.172781	-0.200269	0.144886	0.26875	0.0395137	-0.112941	-0.26087	-0.203509	0.147368	0.247748	0.475556	0.716667
ORC1L|4998	0.177418	0.0994624	0.0511364	-0.00625	0.10233	0.0317647	0.144928	-0.0631579	-0.0947368	0.364865	0.315556	0.783333
GSG2|83903	0.21221	0.0591398	0.257102	0.0544643	0.0780142	0.0235294	0.140097	-0.210526	0.0421053	0.413288	0.333333	0.719048
WDHD1|11169	0.149385	0.123656	0.119318	0.13125	0.163121	0.0576471	-0.115942	-0.308772	-0.389474	0.225225	-0.0577778	0.835714
TMEM79|84283	0.0772187	0.0430108	0.0553977	0.191071	-0.0314083	0.105882	-0.227053	-0.315789	-0.210526	0.242117	-0.0133333	0.652381
C10orf140|387640	0.185367	-0.198925	-0.127841	0.277679	0.159068	-0.0258824	-0.0966184	-0.278947	-0.0842105	0.246622	0.0666667	0.590476
REEP4|80346	0.0217976	-0.0846774	-0.34233	-0.151786	0.0314083	0.0635294	-0.0289855	-0.298246	0.0526316	0.208333	0.0844444	0.614286
HOXA5|3202	0.183391	0.28629	-0.166193	0.0526786	-0.183384	0.0470588	0.222222	-0.17193	-0.347368	0.267455	0.635556	0.92619
HOXA7|3204	0.219776	0.102151	-0.139205	-0.0491071	-0.100304	0.0317647	0.0966184	-0.245614	-0.147368	0.288288	0.537778	0.971429
HOXA9|3205	0.116601	0.193548	-0.375	-0.0758929	-0.167173	0.0329412	-0.0483092	-0.354386	-0.126316	0.0653153	0.68	0.985714
HOXA11|3207	0.124469	0.423387	-0.15625	0.0651786	0.122594	0.0641176	0.183575	-0.326316	-0.2	-0.331081	0.253333	0.747619
HOXA10|3206	0.123219	0.413978	-0.113636	-0.0258929	0.0111449	0.0811765	0.0917874	-0.445614	0	-0.0608108	0.173333	0.97619
AVIL|10677	0.127587	0.278226	-0.18608	0.08125	-0.0699088	0.172941	0.236715	-0.375439	-0.0526316	-0.185811	0.653333	0.754762
HOXA6|3203	0.17643	0.176075	-0.0852273	0.169643	-0.160081	0.0964706	0.154589	-0.547368	0.0421053	0.189189	0.36	0.847619
SPRY4|81848	0.0810756	0.102151	0.234375	0.0241071	0.0597771	0.371765	0.0869565	0.0561404	-0.536842	-0.31982	0.137778	0.540476
KDELR3|11015	0.0365264	-0.122312	0.43608	0.186607	0.0658561	0.245882	0.115942	-0.0666667	-0.136842	-0.228604	0.573333	0.542857
IGDCC4|57722	0.0763183	-0.00268817	0.0482955	-0.0473214	-0.205674	-0.22	0.0772947	0.119298	-0.294737	-0.117117	0.52	0.821429
FKBP9|11328	0.188572	0.276882	0.142045	0.0892857	0.110436	0.0364706	-0.0628019	0.0175439	-0.178947	-0.0135135	0.626667	0.719048
PBX4|80714	0.0940708	0.0241935	0.163352	0.01875	0.0597771	-0.194118	0.202899	0.196491	-0.0631579	0.15991	0.608889	0.404762
TNFAIP6|7130	0.222955	-0.0672043	-0.0525568	-0.00892857	0.0334347	-0.14	0.231884	0.25614	0.0210526	0.0822072	0.742222	0.688095
PTX3|5806	0.169596	-0.260753	-0.00426136	-0.0491071	-0.0597771	-0.0435294	0.0821256	0.0754386	0.252632	0.306306	0.786667	0.814286
FAM119B|25895	0.176101	0.290323	-0.115057	0.219643	-0.408308	0.421176	-0.0386473	0.157895	-0.105263	-0.164414	0.617778	0.914286
C7orf42|55069	0.140555	0.262097	0.210227	0.0991071	-0.430598	0.378824	-0.0628019	0.0596491	0.178947	0.027027	0.217778	0.7
KDELR2|11014	0.158765	0.221774	0.414773	0.145536	-0.0172239	0.403529	0.057971	0.105263	0.115789	-0.184685	0.404444	0.792857
OS9|10956	0.0738591	0.0846774	0	0.101786	-0.148936	0.207059	0.0386473	0.0947368	0	-0.13964	0.626667	0.195238
TSPAN31|6302	0.0773531	0.00268817	-0.0838068	-0.0196429	-0.0719352	0.302353	0.0338164	0.0842105	0.347368	0.0619369	0.688889	0.240476
MARCH9|92979	0.0701634	0.193548	-0.176136	0.144643	0.130699	0.178824	0.0338164	0.270175	0.178947	-0.239865	0.662222	0.388095
KRT10|3858	0.238429	0.278226	-0.0184659	0.0375	0.272543	0.435294	-0.193237	-0.119298	0.484211	-0.130631	0.44	0.345238
CYP27B1|1594	0.259152	0.219086	0.0738636	0.183036	0.0273556	0.498824	-0.0241546	0.214035	0.221053	-0.0326577	0.724444	0.592857
METTL1|4234	0.289644	0.223118	0.132102	0.2	0.209726	0.487059	0.169082	0.315789	0.442105	0.158784	0.706667	0.511905
HOXD13|3239	0.247312	0.0900538	-0.0965909	0.109821	-0.106383	0.345294	0.0144928	-0.133333	-0.357895	0.173423	0.235556	0.661905
IGF2BP2|10644	0.142544	0.0322581	0.0369318	0.0241071	-0.047619	0.195294	-0.154589	0.284211	-0.305263	0.386261	0.28	0.685714
HMGA2|8091	0.0847444	0.0967742	-0.0745739	0.0660714	0.155015	0.401176	-0.130435	0.182456	-0.273684	0.212838	0.288889	0.488095
RP9|6100	0.207587	0.366935	0.166193	0.116071	0.280648	0.118824	-0.294686	0.340351	-0.336842	-0.102477	0.315556	0.492857
SNRPA1|6627	0.107321	0.182796	0.0951705	0.227679	0.173252	0.247059	-0.0144928	0.22807	-0.221053	0.0247748	0.137778	0.264286
BLM|641	0.28486	0.153226	0.232955	-0.0232143	0.244174	0.355294	0.217391	0.22807	-0.505263	0.402027	0.191111	0.464286
CENPO|79172	0.276669	0.0430108	0.308239	-0.0205357	0.134752	0.258824	0.154589	0.438596	-0.357895	0.408784	0.395556	0.547619
C1orf112|55732	0.272335	0.155914	0.463068	-0.0553571	0.0151976	0.36	0.207729	0.154386	-0.242105	0.338964	0.413333	0.590476
SPRED2|200734	0.176033	0.108871	0.269886	-0.121429	0.0759878	0.434118	0.149758	0.0491228	-0.231579	0.138514	0.511111	0.488095
EPHB2|2048	0.170618	0.0672043	-0.0255682	-0.0303571	0.426545	-0.1	-0.0531401	0.414035	-0.0736842	0.666667	0.591111	0.607143
CDC25B|994	0.232973	0.0389785	-0.0610795	0.0339286	0.341439	0.201176	0.0241546	0.312281	-0.0421053	0.65991	0.306667	0.645238
GNAI3|2773	0.175711	0.116935	0.214489	0.104464	-0.10233	-0.0823529	-0.347826	0.0491228	-0.210526	0.356982	0.306667	0.547619
GARS|2617	0.202891	0.169355	0.142045	0.0258929	0.163121	0.0552941	-0.241546	0.252632	-0.221053	0.316441	0.431111	0.397619
NRAS|4893	0.120041	0.0584677	0.15767	-0.00803571	-0.0780142	-0.0623529	-0.275362	0.312281	0.0210526	0.369369	0.573333	0.464286
C1orf52|148423	0.227342	0.228495	0.0511364	0.396429	-0.0395137	0.178824	-0.111111	0.147368	0.157895	0.370495	0.528889	0.345238
C6orf145|221749	0.241265	0.0551075	-0.0482955	0.404464	0.130699	0.178824	-0.0966184	0.17193	0.0631579	0.387387	0.573333	0.514286
EYA4|2070	0.190635	0.0376344	-0.0724432	0.0232143	-0.317123	0.00588235	-0.0193237	-0.0210526	0.0526316	0.699887	0.0133333	0.57619
HOXA4|3201	0.282656	0.0376344	-0.0880682	-0.11875	-0.126646	0.110588	-0.0966184	0.22807	0.2	0.467342	0.0133333	0.933333
HOXA2|3199	0.237623	0.422043	-0.137784	0.139286	-0.177305	0.109412	-0.169082	-0.0807018	0.231579	0.385135	0.235556	0.80119
HOXA3|3200	0.20754	0.387097	-0.213068	-0.0625	-0.152989	0.0294118	-0.0628019	0.291228	0.221053	0.374437	0.413333	0.916667
HOXA1|3198	0.267054	0.224462	-0.0610795	0.119643	-0.0921986	0.258824	-0.101449	0.0526316	0.147368	0.306306	0.706667	0.830952
EXOC3|11336	0.00206284	-0.0228495	-0.03125	-0.115179	-0.0800405	0.274118	-0.193237	-0.00701754	0.389474	0.418919	-0.182222	-0.457143
EPM2AIP1|9852	0.0297667	0.126344	-0.0767045	-0.0589286	0.0374873	0.182353	0.0724638	0.136842	0.2	0.239865	-0.644444	-0.490476
MTHFD2|10797	0.0558109	0.0241935	0.12642	0.203571	0.0577508	0.137647	0.289855	0.284211	0.263158	0.394144	-0.608889	-0.685714
SLC4A5|57835	0.0495619	-0.0658602	0.204545	0.108929	0.126646	0.0682353	0.357488	0.4	0.0315789	0.233108	-0.235556	-0.545238
TEX19|400629	0.101019	0.142473	-0.0738636	0.286161	0.463019	0.187059	0.241546	0.201754	0.326316	0.208333	-0.28	-0.6
SDHA|6389	0.0304118	0.0954301	0.0568182	0.0678571	0.2077	0.08	0.130435	0.105263	0.221053	0.311937	-0.04	-0.428571
POLDIP2|26073	0.116823	0.245968	0.34375	-0.0375	0.438703	0.124706	0.0869565	0.0877193	0.378947	0.185811	-0.431111	-0.166667
TMEM199|147007	0.202736	0.263441	0.336648	0.03125	0.315096	0.124706	0.0869565	0.396491	0.168421	0.126126	-0.386667	-0.140476
GNB3|2784	0.172654	0.191532	0.161932	-0.0125	0.144883	0.0705882	0.0676329	0.322807	0.231579	0.341216	-0.386667	-0.102381
C17orf96|100170841	0.171908	0.258065	0.316761	0.124107	0.377913	0.229412	-0.0434783	0.389474	0.368421	0.291667	-0.0844444	-0.521429
ERAL1|26284	0.226267	0.420699	0.507102	0.11875	0.375887	0.177647	0.149758	0.287719	0.431579	0.368243	-0.0133333	-0.166667
PSMD3|5709	0.226805	0.303763	0.333807	0.0455357	0.400203	0.348235	-0.0917874	0.470175	0.621053	0.0202703	-0.0666667	-0.0809524
TTC7B|145567	0.220851	0.353495	0.321023	0.480357	0.189463	0.0423529	-0.130435	0.273684	-0.0210526	0.216216	-0.164444	-0.0952381
PFDN4|5203	0.266745	0.513441	0.383523	0.184821	0.355623	0.589412	0.0338164	0.382456	-0.0105263	0.39527	-0.0666667	-0.304762
ZNF622|90441	0.12033	0.0712366	0.198864	0	0.0557244	0.241176	0	0.42807	0.252632	0.460586	0.0222222	-0.72619
DLL3|10683	0.161479	0.291667	0.102983	0.227679	0.104357	0.351176	0.125604	0.34386	0.368421	0.452703	0.111111	-0.528571
GTPBP4|23560	0.155311	0.227151	0.556818	-0.0169643	0.0840932	0.191765	0.0289855	0.249123	0.105263	0.451577	0.173333	-0.488095
C9orf25|203259	0.20279	0.149194	0.0340909	0.109821	0.321175	0.265882	-0.0724638	0.270175	0.178947	0.380631	0.288889	-0.466667
BRD9|65980	0.115868	0.252688	0.0340909	-0.0178571	0.349544	0.338824	0.0434783	0.150877	0.231579	0.154279	0.377778	-0.402381
NKAIN1|79570	0.187208	0.547043	0.259943	0.046875	0.284701	0.198235	-0.227053	-0.0719298	0.0736842	0.210586	0.502222	-0.361905
MRPS17|51373	0.20404	0.237903	0.315341	0.2125	0.25228	0.231765	0.00966184	0.578947	0.189474	0.277027	-0.768889	0.545238
CCT6A|908	0.193007	0.111559	0.306818	0.105357	0.130699	0.144706	-0.0386473	0.42807	-0.0631579	0.195946	-0.688889	0.554762
METTL5|29081	0.126767	0.146505	0.177557	0.250893	0.205674	0.255294	0.0676329	0.607018	0.252632	0.175676	-0.777778	0.0857143
FAHD2B|151313	0.192899	-0.0819892	0.228693	0.116964	0.329281	0.401176	0.188406	0.540351	0.305263	0.201577	-0.6	0.478571
MITD1|129531	0.0659437	-0.0913978	0.102273	0.0892857	0.104357	0.203529	-0.140097	0.361404	0.136842	0.164414	-0.422222	0.371429
MED10|84246	0.264554	0.137097	0.255682	0.323214	0.383992	0.298824	-0.188406	0.245614	0.378947	0.365991	-0.448889	0.538095
ZNF883|169834	0.201809	0.325269	0.235795	0.204464	0.262411	0.282353	-0.241546	0.0491228	0.473684	0.373874	-0.208889	0.159524
FBXO17|115290	0.297667	0.319892	0.107955	0.224107	0.0395137	0.141176	0.057971	0.263158	0.284211	0.454955	-0.413333	0.654762
RPAP3|79657	0.180119	0.321237	0.0951705	-0.00982143	0.0942249	0.318824	0.222222	0.291228	0.378947	0.415541	-0.377778	0.442857
C5orf33|133686	0.204691	0.24328	0.207386	-0.132143	0.0921986	0.0870588	0.140097	0.0561404	0.505263	0.557432	-0.208889	0.338095
TPRKB|51002	0.165894	0.198925	0.303267	0.167857	0.26849	0.412941	-0.135266	0.249123	-0.273684	0.359234	-0.706667	-0.154762
INPP4A|3631	0.108316	0.0483871	0.177557	-0.0705357	-0.00303951	0.183529	0.149758	0.161404	-0.168421	0.536036	-0.644444	0.102381
CSTF1|1477	0.164248	0.0739247	0.21733	0.276786	0.110436	0.362353	0.231884	0.231579	-0.315789	0.443694	-0.511111	0
C20orf111|51526	0.243724	0.0430108	-0.0497159	0.233929	0.140831	0.505882	0.289855	0.403509	0.0210526	0.489865	-0.457778	0.0357143
C20orf107|388799	0.153685	0.176075	0.0568182	0.116518	0.225937	0.109412	0.405797	0.333333	-0.0210526	0.180743	-0.284444	-0.169048
DUSP12|11266	0.256477	0.0564516	0.133523	0.242857	0.286727	0.350588	0.323671	0.368421	-0.168421	0.143018	-0.2	0.102381
SLMO2|51012	0.19943	0.168011	0.306818	0.0133929	0.22999	0.208235	0.352657	0.435088	0.0631579	0.415541	-0.351111	0.228571
UQCC|55245	0.18321	0.153226	0.0269886	0.139286	0.236069	0.258824	0.275362	0.252632	0.231579	0.328829	-0.288889	0.135714
DHX16|8449	0.192133	0.385753	0.31108	0.171429	0.388045	0.202353	0.309179	0.350877	0.252632	0.137387	-0.271111	0.235714
ABCF1|23	0.223821	0.369624	0.161932	0.0973214	0.14691	0.374118	0.188406	0.42807	0.0315789	0.416667	-0.226667	0.157143
PCMT1|5110	0.230668	0.306452	0.194602	0.154464	0.00506586	0.361176	0.125604	0.249123	0.136842	0.275901	-0.155556	0.0738095
TMEFF1|8577	0.206351	0.370968	0.116477	0.195536	0.189463	0.207059	0.188406	0.266667	0.147368	0.393018	-0.0666667	0.0380952
TRIB3|57761	0.25465	0.396505	0.116477	0.189286	0.0921986	0.310588	0.101449	0.375439	0.431579	0.320946	0.0222222	0.169048
TAF4|6874	0.246721	0.438172	0.409091	0.171429	0.339412	0.329412	0.275362	0.0280702	-0.252632	0.352477	-0.235556	0.0666667
STAU1|6780	0.21432	0.321237	0.340909	0.132143	0.223911	0.405882	0.246377	0.147368	-0.442105	0.38964	-0.173333	0.328571
YWHAB|7529	0.215221	0.215054	0.428977	0.0803571	0.0253293	0.316471	0.357488	0.112281	-0.294737	0.515766	-0.164444	-0.116667
MURC|347273	0.201312	0.327957	0.0639205	0.0357143	0.371834	0.185882	0.362319	0.187719	-0.231579	0.336149	-0.0222222	0.111905
ZFP64|55734	0.235238	0.337366	0.130682	0.214286	0.0192503	0.345882	0.521739	0.214035	-0.252632	0.323198	0.00444444	0.164286
YTHDF1|54915	0.289416	0.517473	0.210227	0.31875	0.288754	0.351765	0.400966	0.238596	-0.336842	0.253378	0.217778	0.480952
DSCC1|79075	0.247433	0.0416667	0.349432	0.0678571	0.284701	0.378824	0.10628	0.315789	0.178947	0.26464	-0.351111	0.659524
CKS1B|1163	0.267054	0.104839	0.372159	0.361607	0.22999	0.474118	0.202899	0.449123	0.252632	0.435811	-0.244444	0.72619
CSE1L|1434	0.280654	0.294355	0.267045	0.148214	0.298886	0.298824	0.120773	0.442105	-0.126316	0.528153	-0.271111	0.561905
DPM1|8813	0.285868	0.322581	0.379261	0.183929	0.161094	0.412941	0.00966184	0.62807	0.0947368	0.418919	-0.235556	0.433333
AURKA|6790	0.308411	0.251344	0.299716	0.279464	0.219858	0.458824	0.42029	0.466667	-0.242105	0.472973	-0.128889	0.797619
DDX27|55661	0.276461	0.354839	0.390625	0.249107	0.379939	0.610588	0.111111	0.37193	-0.242105	0.452703	-0.102222	0.342857
PNPT1|87178	0.262028	0.270161	0.360795	0.1125	0.325228	0.337647	0.111111	0.368421	-0.189474	0.531532	-0.0488889	0.309524
RAE1|8480	0.372803	0.329301	0.336648	0.420536	0.337386	0.458824	0.198068	0.403509	-0.115789	0.529279	0.128889	0.421429
PSMA7|5688	0.293945	0.293011	0.166193	0.270536	0.444782	0.422353	0.183575	0.34386	0.0315789	0.272523	0.00444444	0.388095
CTNNBL1|56259	0.266019	0.0510753	0.31108	0.110714	0.319149	0.335294	-0.0869565	0.34386	0.178947	0.327703	-0.173333	-0.102381
CCDC127|133957	0.121943	0.0349462	0.122159	0.265179	0.242148	0.237647	-0.0676329	0.470175	0.368421	0.426802	-0.102222	0.0761905
IGF2BP1|10642	0.140226	0.137097	0.0113636	-0.141071	0.322188	0.261176	0.0628019	0.154386	0.210526	0.470158	-0.155556	0.0285714
WDR70|55100	0.234962	0.0551075	0.0596591	0.0928571	0.349544	0.251765	-0.0289855	0.245614	0.4	0.652027	-0.146667	0.0309524
NOP56|10528	0.264326	0.0766129	0.0951705	0.0964286	0.390071	0.174118	0.251208	0.364912	0.157895	0.658784	-0.111111	0.047619
C20orf27|54976	0.19177	-0.00537634	-0.113636	0.109821	0.266464	0.0905882	0.0724638	0.529825	0.210526	0.658784	-0.102222	0.0785714
ACTL8|81569	0.140804	0.136425	0.0696023	0.175893	0.100304	0.0711765	0	0.168421	0.0736842	0.737613	0.173333	-0.0857143
IDH3B|3420	0.185051	0.0201613	0.0284091	0.0294643	0.311044	0.128235	-0.0531401	0.315789	-0.0842105	0.546171	0.0133333	0.0785714
RNF114|55905	0.204792	0.229839	-0.0838068	0.0544643	0.0759878	0.310588	0.439614	0.578947	-0.105263	0.585586	0.173333	0.12381
C20orf4|25980	0.206862	0.325269	0.170455	0.151786	0.12462	0.354118	0.178744	0.129825	0.0736842	0.574324	-0.0666667	0.254762
XPO5|57510	0.219682	0.239247	0.221591	0.0160714	0.0618034	0.281176	0.169082	0.322807	-0.147368	0.588964	-0.04	0.392857
GAL|51083	0.223385	0.104839	0.117898	0.170536	0.0921986	0.271176	0.154589	0.338596	0.0526316	0.515766	0.262222	0.270238
MRPL36|64979	0.276058	0.153226	0.147727	0.183036	0.386018	0.391765	-0.0386473	0.368421	0.242105	0.551802	-0.0755556	0.359524
ANKLE1|126549	0.220811	0.108871	0.167614	0.0625	0.240122	0.312941	0.236715	0.361404	0.273684	0.472973	0.0222222	0.25
SPC25|57405	0.292923	0.127688	0.183239	0.158929	0.331307	0.198824	0.21256	0.392982	0.168421	0.377252	0.0133333	0.511905
NDUFS6|4726	0.170645	0.225806	-0.137784	0.04375	0.475177	0.324706	-0.00483092	0.22807	0.336842	0.368243	0.0844444	0.285714
LRFN1|57622	0.199712	0.0860215	0.0198864	0.0205357	0.365755	0.0788235	0.21256	0.378947	0.263158	0.492117	0.164444	0.140476
SNRPD1|6632	0.258359	0.209677	0.0511364	0.154464	0.33536	0.311765	0.256039	0.519298	0.305263	0.256757	0.155556	0.147619
NPEPL1|79716	0.13987	-0.0389785	-0.127841	0.215179	0.286727	-0.0823529	0.289855	0.487719	0.0947368	-0.00788288	-0.484444	0.557143
C19orf44|84167	0.0519809	-0.0725806	-0.122159	0.05625	0.345491	0.281176	0.512077	0.150877	0.189474	-0.0968468	-0.271111	0.469048
HOXC11|3227	0.236239	0.206989	0.113636	0.141071	0.452888	0.0847059	0.178744	-0.0666667	0.231579	-0.00788288	-0.44	0.508333
HOXC10|3226	0.237583	0.135753	0.193892	0.00714286	0.420466	0.165882	0.222222	0.0631579	0.215789	-0.0681306	-0.146667	0.683333
CDC6|990	0.210087	0.153226	0.392045	0.0705357	0.412361	0.389412	0.101449	0.122807	0.168421	-0.111486	-0.0488889	0.733333
WDR62|284403	0.235204	0.111559	-0.0326705	0.189286	0.254306	0.108235	0.299517	0.112281	0.126316	0.0743243	-0.12	0.854762
E2F1|1869	0.265522	0.174731	0.0553977	0.0696429	0.454914	0.165882	0.405797	0.17193	0.168421	0.382883	-0.102222	0.67381
CHCHD2|51142	0.133621	0.204301	0.31392	-0.0258929	0.284701	0.336471	-0.0241546	0.564912	0.336842	-0.036036	-0.271111	0.478571
ETV4|2118	0.0805918	0.127688	0.174716	0.0214286	0.0557244	0.368235	0.0966184	0.45614	0.0105263	-0.137387	-0.102222	0.547619
GJC1|10052	0.296243	0.262097	0.213068	0.116964	0.0151976	0.0317647	0.0338164	0.315789	-0.0947368	-0.143018	-0.351111	0.82381
SEC61G|23480	0.313914	0.384409	0.34233	0.292857	0.157042	0.417647	0.115942	0.357895	-0.147368	-0.0574324	-0.0222222	0.778571
CDC45|8318	0.235634	0.0819892	0.178977	0.180357	0.256332	0.0505882	-0.0193237	0.498246	0.263158	0.115991	-0.04	0.780952
NRM|11270	0.19556	0.229839	-0.00426136	0.264286	0.274569	0.189412	-0.0434783	0.161404	0.157895	0.0743243	-0.0222222	0.645238
SHCBP1|79801	0.257526	0.119624	0.225852	0.101786	0.201621	0.118824	-0.0917874	0.101754	0.210526	0.0934685	0.0933333	0.788095
NUDT1|4521	0.276676	0.150538	0.078125	0.171429	0.430598	0.181176	-0.21256	0.189474	0.242105	0.203829	0.377778	0.404762
KIAA0415|9907	0.171646	0.18414	0.228693	0.303571	0.361702	0.0811765	-0.140097	0.140351	0.136842	-0.0720721	0.297778	0.564286
MPV17L|255027	0.181261	0.103495	-0.132102	0.0169643	0.0070922	0.156471	0.21256	0.0912281	0.305263	0.314189	-0.0577778	0.566667
C4orf21|55345	0.192644	0.217742	-0.0511364	0.104464	0.197568	-0.0117647	-0.0241546	-0.0666667	0.157895	0.218468	0.00444444	0.533333
CENPN|55839	0.205625	0.0967742	-0.0511364	0.180357	0.132725	-0.0952941	-0.0144928	0.0245614	0.557895	0.125	0.2	0.871429
PPFIA1|8500	0.19511	0.122312	0.184659	0.521429	-0.181358	0.172941	0.246377	0.214035	0.231579	0.153153	-0.102222	0.6
BET1|10282	0.100226	0.0255376	0.295455	0.391964	-0.159068	0.214118	0.362319	0.150877	0.315789	-0.108108	0.0755556	0.45
FADD|8772	0.157112	0.00806452	-0.03125	0.549107	-0.00911854	0.0223529	0.183575	0.207018	0.410526	0.111486	0.173333	0.540476
ORAOV1|220064	0.261853	0.221774	0.261364	0.517857	0.10233	0.227059	0.164251	0.319298	0.326316	-0.0247748	0.102222	0.171429
MAP6D1|79929	0.233961	0.15457	0.441761	0.304464	0.161094	0.208235	0.0628019	0.25614	0.621053	0.118806	0.244444	0.359524
SNRPG|6637	0.174797	0.119624	0.28125	0.227679	0.221884	0.392941	0.10628	0.242105	0.168421	0.120495	-0.146667	0.371429
PPP5C|5536	0.158698	0.047043	0.336648	0.0491071	0.221884	0.181176	0.101449	0.0947368	0.0210526	0.0304054	0.0222222	0.330952
HOXC9|3225	0.297882	0.270833	0.271307	0.0517857	0.458967	0.269412	0.309179	-0.0561404	0.347368	0.0608108	0.128889	0.280952
ERBB2|2064	0.0595872	-0.0913978	0.240057	-0.125893	0.398176	0.404706	0.0917874	-0.0210526	-0.0105263	0.38964	0.0133333	0.535714
GRB7|2886	0.104755	0.0215054	0.28267	0.0357143	0.47923	0.434118	-0.0241546	0.0736842	0.178947	0.425676	0.168889	0.292857
NUP107|57122	0.272711	0.369624	0.417614	-0.05	-0.155015	0.416471	0.371981	0.0140351	0.178947	0.493243	0.208889	0.430952
IFT52|51098	0.225528	0.358871	0.221591	0.227679	-0.138804	0.337647	0.463768	0.105263	0.105263	0.289414	0.351111	0.278571
HOXC8|3224	0.269977	0.329973	0.00568182	0.142857	0.0253293	0.316471	0.328502	-0.0947368	0.0631579	0.158784	0.137778	0.347619
HOXC6|3223	0.253299	0.258737	0.0852273	0.1375	0.116515	0.398824	0.2657	0.0491228	0.105263	0.188063	0.164444	0.47619
DDIT3|1649	0.247984	0.395161	-0.078125	0.208929	0.388045	0.449412	0.376812	0.37193	0.431579	0.0349099	-0.111111	0.147619
RILPL1|353116	0.164624	0.420699	-0.09375	0.308036	0.329281	0.0882353	0.0966184	0.273684	0.589474	-0.227477	0.0577778	0.145238
C17orf37|84299	0.133621	-0.16129	0.0383523	0.113393	0.544073	0.605882	0	0.14386	0.663158	0.131757	0.0933333	0.0285714
STARD3|10948	0.166593	0.016129	0.224432	0.06875	0.327254	0.4	0.0434783	0.421053	0.631579	-0.177928	0.448889	0.00714286
IFT20|90410	0.150796	0.016129	0.292614	0.0830357	0.37386	0.24	0.275362	0.245614	0.4	-0.31982	0.36	0.297619
ORMDL3|94103	0.0772322	0.0685484	0.245739	0.0642857	0.341439	0.154118	0.120773	0.266667	0.305263	-0.115991	0.457778	0.442857
KPNA2|3838	0.208138	0.108871	0.3125	0.0169643	0.270517	0.129412	-0.0676329	0.224561	-0.231579	0.206081	-0.04	0.75
TCF19|6941	0.202212	0.270161	0.0951705	0.05	0.140831	-0.0105882	0.0338164	0.22807	-0.2	0.238739	0.0488889	0.795238
ARHGAP11A|9824	0.223882	0.112903	0.122159	0.0633929	0.108409	0.150588	0.115942	0.00350877	-0.147368	0.272523	-0.0488889	0.807143
CENPF|1063	0.248629	0.236559	0.116477	0.0678571	0.286727	0.188235	0.154589	-0.00350877	-0.0736842	0.394144	-0.0222222	0.8
ASPM|259266	0.233269	0.178763	0.0454545	0.114286	0.150963	0.181176	0.198068	-0.115789	-0.136842	0.418919	0.0755556	0.821429
KIF14|9928	0.248602	0.114247	0.12358	0.133929	0.264438	0.282353	0.256039	0.126316	-0.136842	0.332207	-0.0666667	0.72381
PRC1|9055	0.286956	0.137097	0.12358	0.0491071	0.203647	0.296471	0.207729	0.0526316	-0.105263	0.431306	0.0577778	0.733333
NDC80|10403	0.270252	0.077957	0.0681818	0.102679	0.302938	0.282353	0.183575	0.0736842	-0.263158	0.460586	0.00444444	0.795238
NUSAP1|51203	0.249301	0.13172	0.125	0.200893	0.280648	0.202353	0.169082	-0.164912	-0.305263	0.364865	0.182222	0.695238
HMGB2|3148	0.233034	0.321237	0.176136	0.05625	0.278622	0.0729412	0.0869565	0.101754	0.0631579	0.522523	-0.146667	0.652381
C5orf34|375444	0.27931	0.282258	0.0923295	-0.000892857	0.236069	0.330588	0.149758	-0.0105263	0.0842105	0.615991	-0.0577778	0.821429
BUB1|699	0.299078	0.196237	0.440341	0.153571	0.175279	0.288235	0.207729	0.2	0.0210526	0.454955	-0.0933333	0.797619
TOP2A|7153	0.322367	0.264785	0.332386	0.110714	0.331307	0.367059	0.173913	0.157895	0.115789	0.31982	0.0133333	0.728571
CKAP2L|150468	0.300583	0.130376	0.386364	0.0776786	0.219858	0.227059	0.0434783	0.192982	0.126316	0.346847	0.04	0.754762
RACGAP1|29127	0.27552	0.139785	0.25142	-0.0508929	0.138804	0.302353	0.130435	0.0736842	0.294737	0.431306	-0.00444444	0.578571
KIF23|9493	0.285236	0.231183	0.232955	0.208929	0.173252	0.268235	0.140097	0.168421	-0.284211	0.45045	0.111111	0.807143
KIF4A|24137	0.258305	0.163978	0.146307	0.153571	0.175279	0.196471	0.120773	0.168421	-0.263158	0.404279	0.0844444	0.788095
SGOL2|151246	0.295651	0.217742	0.245739	0.0964286	0.0638298	0.365882	0.130435	0.150877	-0.126316	0.387387	0.04	0.833333
CENPL|91687	0.277926	0.115591	0.328125	0.203571	0.114488	0.283529	0.202899	0.108772	-0.0736842	0.368243	0.0577778	0.840476
CCNB2|9133	0.281541	0.165323	0.323864	0.14375	0.122594	0.234118	0.241546	0.214035	-0.0736842	0.488739	0.128889	0.742857
TTK|7272	0.261114	0.204301	0.315341	0.125	0.100304	0.282353	0.149758	0.164912	-0.0315789	0.532658	0.0755556	0.709524
TPX2|22974	0.310582	0.205645	0.252841	0.0892857	0.240122	0.376471	0.101449	0.312281	-0.0315789	0.564189	0.128889	0.792857
IGF2BP3|10643	0.211149	0.169355	0.117898	0.0901786	0.0273556	0.28	-0.0338164	0.112281	-0.0526316	0.362613	0.137778	0.9
KIF2C|11004	0.27978	0.219086	0.234375	0.198214	0.104357	0.235294	0.0869565	0.126316	-0.0526316	0.510135	0.191111	0.82381
CDC20|991	0.199269	0.204301	0.160511	0.235714	0.120567	0.28	0.0869565	0.263158	0	0.426802	0.137778	0.871429
FOXM1|2305	0.231508	0.0954301	0.125	0.0991071	0.0678825	0.107059	0.00483092	0.189474	-0.0842105	0.483108	0.0133333	0.740476
RAD54L|8438	0.224057	0.196237	0.184659	0.129464	0.0800405	0.0788235	0.00483092	0.319298	0.0315789	0.370495	0.155556	0.809524
CDCA8|55143	0.230232	0.22043	0.18608	0.229464	0.0739615	0.257647	0.125604	-0.0421053	0.0947368	0.426802	0.102222	0.835714
DEPDC1|55635	0.244396	0.155914	0.176136	0.129464	0.0982776	0.285882	0.154589	-0.0350877	0.0315789	0.421171	0.0133333	0.883333
PSRC1|84722	0.205343	0.0994624	0.181818	0.321429	0.0739615	0.125882	0.154589	0.364912	0.147368	0.506757	-0.102222	0.67619
MAD2L1|4085	0.254818	0.13172	0.163352	0.219643	0.0577508	0.14	0.352657	0.298246	0.294737	0.376126	-0.0488889	0.642857
CDCA5|113130	0.252621	0.202957	0.163352	0.125893	0.128673	0.164706	0.280193	0.470175	-0.0315789	0.418919	0.0133333	0.67381
FANCD2|2177	0.245579	0.0645161	0.257102	-0.0607143	0.18541	-0.00588235	0.149758	0.4	0.178947	0.504505	-0.191111	0.792857
CDC25A|993	0.254502	0.200269	0.15483	-0.0401786	0.327254	-0.0435294	0.0676329	0.326316	0.136842	0.422297	0.0577778	0.752381
SPC24|147841	0.265065	0.104839	0.0923295	-0.0241071	0.238095	-0.0223529	0.198068	0.294737	0.189474	0.363739	0.0488889	0.785714
HOXC4|3221	0.245081	0.228495	0.18608	-0.139286	0.0496454	0.0847059	0.275362	0.17193	0.136842	0.28491	0.368889	0.719048
MCM10|55388	0.253373	0.108871	0.370739	-0.0803571	0.181358	0.147059	0.178744	0.192982	0.210526	0.494369	0.36	0.564286
TRIP13|9319	0.275184	0.147849	0.28267	0.000892857	0.203647	0.237647	0.15942	0.350877	0.347368	0.668919	0.404444	0.738095
RAD51|5888	0.254717	0.030914	0.242898	0.133036	0.197568	0.154118	0.217391	0.217544	-0.0210526	0.306306	0.333333	0.771429
PLK1|5347	0.258856	0.0685484	0.129261	0.15	0.262411	0.254118	0.280193	0.347368	0.136842	0.411036	0.226667	0.747619
WDR67|93594	0.287467	0.0322581	0.244318	0.189286	0.33536	0.191765	0.0483092	0.252632	-0.0105263	0.445946	0.191111	0.666667
KIF15|56992	0.300516	0.137097	0.333807	0.0196429	0.349544	0.0729412	0.164251	0.287719	0.0210526	0.386261	0.235556	0.719048
SKA3|221150	0.244638	0.189516	0.159091	-0.0294643	0.1692	0.32	0.318841	0.0982456	-0.0210526	0.42455	0.235556	0.771429
CCDC150|284992	0.246748	0.268817	0.0369318	0.114286	0.298886	0.168235	0.222222	-0.0315789	0.136842	0.334459	0.235556	0.828571
NCAPG|64151	0.271213	0.163978	0.150568	0.136607	0.266464	0.102353	0.236715	0.147368	0.0105263	0.358108	0.102222	0.82619
FAM64A|54478	0.331492	0.0725806	0.274148	0.266964	0.341439	0.130588	0.2657	-0.0666667	0.147368	0.376126	0.182222	0.761905
CDK1|983	0.211135	0.149194	0.174716	0.117857	0.317123	0.151765	0.0966184	0.0596491	0.221053	0.364865	0.36	0.671429
MAD2L2|10459	0.236185	0.303763	0.146307	0.25	0.392097	0.295294	0.135266	0.178947	0.252632	0.143018	0.342222	0.438095
HOXC5|3222	0.247628	0.33871	0.09375	0.139286	0.242148	0.227059	0.405797	0.245614	0.231579	0.110923	0.386667	0.488095
C20orf20|55257	0.322515	0.288978	0.120739	0.34375	0.388045	0.309412	0.169082	0.284211	0.273684	0.454955	0.52	0.430952
MYBL2|4605	0.279659	0.255376	0.18892	0.172321	0.26849	0.249412	0.280193	0.312281	0.368421	0.372748	0.475556	0.766667
PDRG1|81572	0.295813	0.282258	0.455966	0.241964	0.25228	0.325882	0.164251	0.326316	0.305263	0.36036	0.0577778	0.519048
NCAPH|23397	0.286567	0.155914	0.295455	0.15625	0.288754	0.255294	0.0289855	0.235088	0.442105	0.406532	0.0844444	0.714286
NEK2|4751	0.212318	0.188172	0.183239	0.149107	0.284701	0.357647	0.0821256	0.214035	0.4	0.251126	0.128889	0.730952
SPAG5|10615	0.297519	0.262097	0.349432	0.0910714	0.487335	0.204706	0.241546	0.2	0.252632	0.324324	0.182222	0.761905
NUF2|83540	0.31503	0.130376	0.205966	0.241964	0.388045	0.274118	0.101449	0.259649	0.189474	0.411036	0.0577778	0.797619
EME1|146956	0.288865	0.216398	0.12642	0.0875	0.495441	0.243529	0.193237	0.519298	0.578947	0.175676	0.155556	0.709524
UBE2C|11065	0.296673	0.170699	0.298295	0.333036	0.280648	0.435294	0.236715	0.431579	0.147368	0.448198	0.288889	0.72619
FAM72B|653820	0.322596	0.163978	0.305398	0.19375	0.292806	0.449412	0.135266	0.361404	0.357895	0.335586	0.315556	0.75
FAM72D|728833	0.301873	0.100806	0.292614	0.161607	0.402229	0.467059	0.140097	0.280702	0.126316	0.323198	0.368889	0.771429

## Sheet: 1F
Top 643 |LFC| genes
gene	name	direction(for_geneset_enrichment)	LFC_direction	posteriorLFC	DESeq2_padj	abs(posteriorLFC)	ecDNA(+)_sum	ecDNA(-)_sum	ecDNA(+)_mean	ecDNA(-)_mean	ecDNA(+)_std	ecDNA(-)_std	ecDNA(+)_var	ecDNA(-)_var	#trials(200)	#trials(200)_by_cluster
CLDN18|51208	claudin 18	DOWN	DOWN	-4.50936	7.41755e-50	4.50936	743.93	2323.07	3.18	3.65	3.83	4.39	14.64	19.28
ITLN1|55600	intelectin 1	UP	UP	3.92492	3.99083e-36	3.92492	510.62	1074.91	2.18	1.69	3.39	2.27	11.52	5.15
SST|6750	somatostatin	UP	UP	3.73665	0.00263138	3.73665	496.2	1345.16	2.12	2.12	3.29	2.87	10.79	8.22
TM4SF20|79853	transmembrane 4 L six family member 20	DOWN	DOWN	-3.63283	1.4453e-20	3.63283	338.58	837.32	1.45	1.32	2.59	2.53	6.73	6.42
DPCR1|135656	mucin like 3	DOWN	DOWN	-3.1915	4.92345e-17	3.1915	491.5	1614.62	2.1	2.54	3.11	3.21	9.64	10.31
CYP1A1|1543	cytochrome P450 family 1 subfamily A member 1	UP	UP	3.08362	0.00934571	3.08362	372.86	1057.55	1.59	1.66	2.18	1.91	4.77	3.66
TFF2|7032	trefoil factor 2	DOWN	DOWN	-2.93403	9.18685e-07	2.93403	473.98	1281.74	2.03	2.02	3.44	3.31	11.86	10.94
PNMT|5409	phenylethanolamine N-methyltransferase	UP	UP	2.89382	2.87375e-23	2.89382	729.13	1662.15	3.12	2.61	2.61	2.13	6.84	4.54
AGXT|189	alanine--glyoxylate and serine--pyruvate aminotransferase	UP	UP	2.85086	4.89872e-05	2.85086	189.16	341.05	0.81	0.54	1.48	1.19	2.18	1.41
GP2|2813	glycoprotein 2	DOWN	DOWN	-2.67288	2.73653e-08	2.67288	347.5	1187.04	1.49	1.87	2.81	3.15	7.89	9.93
CA4|762	carbonic anhydrase 4	UP	UP	2.66529	0.00384831	2.66529	660.86	1672.13	2.82	2.63	3.11	2.65	9.7	7.04
HP|3240	haptoglobin	DOWN	DOWN	-2.62104	3.02669e-37	2.62104	865.56	3262.38	3.7	5.13	2.93	3.69	8.58	13.62
LBP|3929	lipopolysaccharide binding protein	DOWN	DOWN	-2.50234	0.0151929	2.50234	500.14	1409.54	2.14	2.22	2.32	2.74	5.4	7.53
PM20D1|148811	peptidase M20 domain containing 1	UP	UP	2.46096	6.56219e-46	2.46096	486.15	930.53	2.08	1.46	2.85	1.68	8.14	2.82
SERPINA6|866	serpin family A member 6	DOWN	DOWN	-2.45774	0.00249472	2.45774	280.68	1091.69	1.2	1.72	1.83	2.58	3.34	6.66
XPNPEP2|7512	X-prolyl aminopeptidase 2	UP	UP	2.43634	4.15577e-30	2.43634	795.56	2002.1	3.4	3.15	2.7	2.17	7.29	4.72
PRH2|5555	proline rich protein HaeIII subfamily 2	DOWN	DOWN	-2.31621	9.81061e-07	2.31621	526.86	1515.98	2.25	2.38	1.15	1.36	1.31	1.86
SFTPD|6441	surfactant protein D	DOWN	DOWN	-2.31056	5.85509e-17	2.31056	876.15	3117.46	3.74	4.9	2.47	3.26	6.09	10.6
C20orf85|128602	chromosome 20 open reading frame 85	DOWN	DOWN	-2.28835	2.51028e-07	2.28835	221.56	1419.64	0.95	2.23	1.95	3.32	3.81	11.03	34	111
CLCA1|1179	chloride channel accessory 1	UP	UP	2.27858	2.22644e-07	2.27858	169.35	254.2	0.72	0.4	1.77	1.29	3.13	1.66
SCARA5|286133	scavenger receptor class A member 5	UP	UP	2.2532	1.07644e-19	2.2532	830.19	2383.06	3.55	3.75	2.98	2.55	8.9	6.52
WNT8B|7479	Wnt family member 8B	UP	UP	2.16926	1.75677e-05	2.16926	315.23	648.72	1.35	1.02	1.43	1.02	2.05	1.04
FCAMR|83953	Fc fragment of IgA and IgM receptor	DOWN	DOWN	-2.16438	3.71019e-07	2.16438	303.65	1102.3	1.3	1.73	1.65	1.94	2.73	3.75
TKTL1|8277	transketolase like 1	UP	UP	2.15708	3.0934e-13	2.15708	502.39	1171.21	2.15	1.84	2.82	2.38	7.95	5.69
ALPI|248	alkaline phosphatase, intestinal	UP	UP	2.14248	3.18377e-06	2.14248	200.19	467.79	0.86	0.74	2.08	1.74	4.34	3.01
MATN4|8785	matrilin 4	UP	UP	2.12523	6.65328e-29	2.12523	481.03	1056.04	2.06	1.66	1.86	1.39	3.46	1.93
SLC14A2|8170	solute carrier family 14 member 2	DOWN	DOWN	-2.09164	2.26182e-19	2.09164	319.09	1276.65	1.36	2.01	1.63	2.05	2.66	4.2
SNTN|132203	sentan, cilia apical structure protein	DOWN	DOWN	-2.08855	1.20973e-09	2.08855	272.85	1400.08	1.17	2.2	1.68	2.75	2.82	7.54	73	111
ANKRD33|341405	ankyrin repeat domain 33	UP	UP	2.07928	2.04005e-13	2.07928	239.29	374.67	1.02	0.59	1.46	1.03	2.12	1.06
UGT2A3|79799	UDP glucuronosyltransferase family 2 member A3	UP	UP	2.07631	0.000234429	2.07631	280.46	701.26	1.2	1.1	2.43	2.39	5.91	5.7
CDHR4|389118	cadherin related family member 4	DOWN	DOWN	-2.06529	9.96456e-13	2.06529	253.71	1348.61	1.08	2.12	1.69	2.85	2.84	8.15	18	111
PTX3|5806	pentraxin 3	UP	UP	2.04938	4.93285e-12	2.04938	1230.92	2799.94	5.26	4.4	2.64	2.11	6.95	4.47	26	26
MSMP|692094	microseminoprotein, prostate associated	UP	UP	2.04921	1.99563e-06	2.04921	1177.4	3079.07	5.03	4.84	1.29	0.79	1.68	0.63
SFTPA2|729238	surfactant protein A2	DOWN	DOWN	-2.01079	6.20925e-17	2.01079	763.08	2808.84	3.26	4.42	3.79	5.06	14.35	25.59
PRSS33|260429	serine protease 33	UP	UP	1.99449	3.76813e-08	1.99449	419.02	1179.79	1.79	1.86	2.43	2.45	5.91	6.01
DCDC2B|149069	doublecortin domain containing 2B	DOWN	DOWN	-1.97374	1.16941e-11	1.97374	102.28	570.33	0.44	0.9	0.8	1.54	0.64	2.37	0	111
CYP2B6|1555	cytochrome P450 family 2 subfamily B member 6	UP	UP	1.9674	1.83576e-07	1.9674	379.46	1150.15	1.62	1.81	2.67	2.63	7.12	6.91
APOBEC4|403314	apolipoprotein B mRNA editing enzyme catalytic polypeptide like 4	DOWN	DOWN	-1.95701	8.25162e-10	1.95701	168.73	897.32	0.72	1.41	1.28	2.1	1.63	4.43	0	111
FABP3|2170	fatty acid binding protein 3	UP	UP	1.94599	0.00535237	1.94599	1602.09	4259.6	6.85	6.7	2.02	1.76	4.09	3.1
DSG4|147409	desmoglein 4	DOWN	DOWN	-1.94005	0.00205872	1.94005	220.11	705.59	0.94	1.11	1.29	1.65	1.65	2.73
AKAP14|158798	A-kinase anchoring protein 14	DOWN	DOWN	-1.93862	8.95239e-10	1.93862	178.5	822.73	0.76	1.29	1.17	1.86	1.36	3.45
MOGAT3|346606	monoacylglycerol O-acyltransferase 3	UP	UP	1.93531	0.00014256	1.93531	225.11	499.93	0.96	0.79	2.11	1.89	4.44	3.59
TCL1A|8115	T cell leukemia/lymphoma 1A	DOWN	DOWN	-1.90517	4.71475e-05	1.90517	433.74	1525.62	1.85	2.4	1.9	2.36	3.59	5.59
CALCB|797	calcitonin related polypeptide beta	UP	UP	1.89029	6.74386e-05	1.89029	299.16	625.01	1.28	0.98	1.89	1.53	3.59	2.33
ADH4|127	alcohol dehydrogenase 4 (class II), pi polypeptide	DOWN	DOWN	-1.88391	6.0611e-05	1.88391	234.36	784.34	1	1.23	1.66	1.96	2.77	3.82
C11orf88|399949	chromosome 11 open reading frame 88	DOWN	DOWN	-1.88384	9.61779e-14	1.88384	346.51	1332.67	1.48	2.1	1.44	2.22	2.07	4.94
SLC38A4|55089	solute carrier family 38 member 4	UP	UP	1.88381	1.17012e-08	1.88381	934.19	2302.45	3.99	3.62	2.7	2.21	7.28	4.87
MUC17|140453	mucin 17, cell surface associated	DOWN	DOWN	-1.84271	1.11979e-05	1.84271	403.5	1104.13	1.72	1.74	3.64	3.58	13.22	12.8
HPSE2|60495	heparanase 2 (inactive)	DOWN	DOWN	-1.83467	1.50075e-13	1.83467	350.98	1285.15	1.5	2.02	1.81	2.49	3.26	6.2
CLEC3B|7123	C-type lectin domain family 3 member B	UP	UP	1.82664	2.66426e-07	1.82664	1493.06	4223.66	6.38	6.64	2.05	1.58	4.21	2.49
SLC26A7|115111	solute carrier family 26 member 7	UP	UP	1.8261	6.91864e-16	1.8261	721.9	1768.09	3.09	2.78	2.41	1.92	5.8	3.7
TMEM190|147744	transmembrane protein 190	DOWN	DOWN	-1.82098	9.2693e-10	1.82098	279.63	1140.78	1.2	1.79	1.46	2.34	2.13	5.49	0	111
F2|2147	coagulation factor II, thrombin	UP	UP	1.80547	1.93295e-05	1.80547	194.37	420.19	0.83	0.66	1.65	1.32	2.72	1.75
C13orf30|144809	family with sequence similarity 216 member B	DOWN	DOWN	-1.78749	2.77122e-08	1.78749	300.51	1503.45	1.28	2.36	1.88	2.76	3.52	7.6
NHLH1|4807	nescient helix-loop-helix 1	UP	UP	1.78059	2.61691e-21	1.78059	681.72	1573.22	2.91	2.47	1.69	1.2	2.86	1.45
AMY2A|279	amylase, alpha 2A (pancreatic)	DOWN	DOWN	-1.77767	0.0476078	1.77767	255.34	993.92	1.09	1.56	1.43	1.75	2.04	3.05
NMUR2|56923	neuromedin U receptor 2	DOWN	DOWN	-1.77271	3.62715e-11	1.77271	345.21	1374.19	1.48	2.16	1.7	2.23	2.89	4.98
VIT|5212	vitrin	UP	UP	1.7659	0.00406877	1.7659	612.85	1510.3	2.62	2.37	2.64	2.19	6.97	4.78
INHBE|83729	inhibin subunit beta E	UP	UP	1.75296	2.82514e-07	1.75296	649.97	1547.82	2.78	2.43	1.66	1.44	2.77	2.07
SPRR3|6707	small proline rich protein 3	DOWN	DOWN	-1.74757	8.6117e-06	1.74757	1019.33	2933.67	4.36	4.61	4.57	5.09	20.88	25.87
SERPINA1|5265	serpin family A member 1	DOWN	DOWN	-1.74706	1.5802e-19	1.74706	2323.67	6863.6	9.93	10.79	2.23	2.76	4.95	7.64
VIP|7432	vasoactive intestinal peptide	DOWN	DOWN	-1.7326	0.00526621	1.7326	348.7	1051.54	1.49	1.65	1.5	1.81	2.25	3.26
LDHAL6A|160287	lactate dehydrogenase A like 6A	UP	UP	1.7268	9.41908e-16	1.7268	230.52	431.14	0.99	0.68	1.4	0.96	1.95	0.92
CDHR2|54825	cadherin related family member 2	DOWN	DOWN	-1.70652	1.51901e-09	1.70652	535.8	1540.78	2.29	2.42	3.03	2.94	9.16	8.62
SLC39A5|283375	solute carrier family 39 member 5	UP	UP	1.69974	3.86778e-09	1.69974	492.58	1336.04	2.11	2.1	2.84	2.71	8.06	7.34
DNAI2|64446	dynein axonemal intermediate chain 2	DOWN	DOWN	-1.69534	1.49398e-08	1.69534	234.96	1074.17	1	1.69	1.38	2.3	1.89	5.28
ABCA9|10350	ATP binding cassette subfamily A member 9	UP	UP	1.69462	6.01382e-24	1.69462	1067.02	3005.87	4.56	4.73	2.22	1.64	4.93	2.69
FGF20|26281	fibroblast growth factor 20	DOWN	DOWN	-1.68835	3.14203e-06	1.68835	191.22	893.67	0.82	1.41	1.34	1.98	1.8	3.93
PRR4|11272	proline rich 4	DOWN	DOWN	-1.68786	7.49979e-08	1.68786	1167.12	3200.28	4.99	5.03	1.31	1.43	1.7	2.05
TGM3|7053	transglutaminase 3	DOWN	DOWN	-1.68759	2.45948e-09	1.68759	806.33	2531.75	3.45	3.98	3.08	3.42	9.49	11.73
SLC46A2|57864	solute carrier family 46 member 2	DOWN	DOWN	-1.68487	9.73867e-13	1.68487	652.62	2127	2.79	3.34	1.52	2.16	2.3	4.66
C17orf37|84299	migration and invasion enhancer 1	UP	UP	1.66695	3.00977e-51	1.66695	2401.02	6238.41	10.26	9.81	1.45	0.71	2.09	0.5	89	89
CAPSL|133690	calcyphosine like	DOWN	DOWN	-1.66124	2.1601e-07	1.66124	312.14	1532.36	1.33	2.41	1.89	2.85	3.56	8.13
GALNT9|50614	polypeptide N-acetylgalactosaminyltransferase 9	DOWN	DOWN	-1.65953	5.66478e-07	1.65953	367.69	1393.46	1.57	2.19	2.18	2.68	4.77	7.2
ISX|91464	intestine specific homeobox	UP	UP	1.65658	0.00125756	1.65658	170.11	414.72	0.73	0.65	1.8	1.78	3.23	3.16
DKK4|27121	dickkopf WNT signaling pathway inhibitor 4	DOWN	DOWN	-1.65459	1.87768e-05	1.65459	304.54	1246.63	1.3	1.96	1.79	3.13	3.2	9.82
CR2|1380	complement C3d receptor 2	DOWN	DOWN	-1.65127	0.00014309	1.65127	698.8	2405.25	2.99	3.78	2.73	2.96	7.44	8.77
MYBPC2|4606	myosin binding protein C, fast type	DOWN	DOWN	-1.64453	6.25965e-11	1.64453	460.11	1862.72	1.97	2.93	2.3	2.75	5.27	7.57	21	21
CCDC33|80125	coiled-coil domain containing 33	DOWN	DOWN	-1.63234	4.58454e-08	1.63234	287.47	1123.43	1.23	1.77	1.64	2.24	2.68	5.03
PLAC9|219348	placenta specific 9	UP	UP	1.62529	1.04942e-08	1.62529	1050.4	2794.02	4.49	4.39	2.18	1.72	4.73	2.95
EMILIN3|90187	elastin microfibril interfacer 3	UP	UP	1.62444	4.12486e-15	1.62444	1185.32	2841.68	5.07	4.47	2.86	2.15	8.18	4.62
TPSAB1|7177	tryptase alpha/beta 1	UP	UP	1.62202	0.0373607	1.62202	1477.05	4340.18	6.31	6.82	3	3.03	8.98	9.18
CALN1|83698	calneuron 1	DOWN	DOWN	-1.62104	3.53784e-08	1.62104	513.16	1758.82	2.19	2.77	2.74	3.46	7.53	11.99
TNXB|7148	tenascin XB	UP	UP	1.61972	1.10803e-09	1.61972	1875.83	5177.41	8.02	8.14	2.38	1.87	5.65	3.49
KNG1|3827	kininogen 1	DOWN	DOWN	-1.61465	0.00031814	1.61465	119.34	390.41	0.51	0.61	1.04	1.2	1.08	1.45
MYH11|4629	myosin heavy chain 11	DOWN	DOWN	-1.60799	3.42894e-11	1.60799	2077.83	6003.46	8.88	9.44	2.74	2.83	7.49	7.99
CTSE|1510	cathepsin E	DOWN	DOWN	-1.60657	2.32815e-06	1.60657	994.54	3414.64	4.25	5.37	4.48	4.72	20.03	22.29
SSX4|6759	SSX family member 4	UP	UP	1.60549	0.0122279	1.60549	214.7	277.64	0.92	0.44	1.7	1.47	2.89	2.16
CDK4|1019	cyclin dependent kinase 4	UP	UP	1.59913	5.36444e-70	1.59913	2813.25	7260.32	12.02	11.42	1.43	0.61	2.05	0.37	188	200
FCRL1|115350	Fc receptor like 1	DOWN	DOWN	-1.59702	6.50807e-09	1.59702	301.53	1176.2	1.29	1.85	1.44	1.93	2.07	3.71
ORM1|5004	orosomucoid 1	DOWN	DOWN	-1.59095	0.00342698	1.59095	537.18	2079.8	2.3	3.27	2.76	3.24	7.59	10.49
ZBBX|79740	zinc finger B-box domain containing	DOWN	DOWN	-1.58354	2.04833e-06	1.58354	298.13	1361.51	1.27	2.14	1.67	2.35	2.78	5.54	7	19
SEC61G|23480	Sec61 translocon gamma subunit	UP	UP	1.58156	1.93669e-60	1.58156	2512.74	6398.9	10.74	10.06	1.3	0.8	1.68	0.64	200	200
C1QTNF9B|387911	C1q and TNF related 9B	UP	UP	1.58141	1.03782e-18	1.58141	410.96	989.41	1.76	1.56	1.49	1.15	2.22	1.32
APOA1|335	apolipoprotein A1	UP	UP	1.58132	0.0108448	1.58132	559.53	1361.79	2.39	2.14	2.51	2.19	6.28	4.8
GPC3|2719	glypican 3	UP	UP	1.58044	0.00235609	1.58044	1552.46	3965.49	6.63	6.24	2.81	2.53	7.89	6.39
CLEC18B|497190	C-type lectin domain family 18 member B	UP	UP	1.56547	5.28181e-14	1.56547	766.9	1717.38	3.28	2.7	2.38	1.87	5.65	3.49
FAM119B|25895	EEF1A lysine methyltransferase 3	UP	UP	1.56212	6.94733e-62	1.56212	1899.94	4851.87	8.12	7.63	1.35	0.68	1.83	0.46	38	181
NOTUM|147111	notum, palmitoleoyl-protein carboxylesterase	DOWN	DOWN	-1.55532	4.17442e-09	1.55532	972.59	3068.47	4.16	4.82	2.34	3.03	5.46	9.16
MDM2|4193	MDM2 proto-oncogene	UP	UP	1.55369	1.58991e-50	1.55369	2644.26	6966.77	11.3	10.95	1.62	0.72	2.61	0.53	194	194
MARCH9|92979	membrane associated ring-CH-type finger 9	UP	UP	1.54451	7.44429e-58	1.54451	2113.06	5503.09	9.03	8.65	1.49	0.73	2.23	0.53	111	190
FAM92B|339145	family with sequence similarity 92 member B	DOWN	DOWN	-1.54314	8.03664e-09	1.54314	331.31	1463.69	1.42	2.3	1.63	2.42	2.65	5.84
CAPN14|440854	calpain 14	DOWN	DOWN	-1.53534	5.71256e-16	1.53534	675.87	2091.52	2.89	3.29	1.95	2.44	3.78	5.97
SLC26A9|115019	solute carrier family 26 member 9	DOWN	DOWN	-1.53393	4.7037e-11	1.53393	1021.82	3399.93	4.37	5.35	2.67	2.97	7.11	8.82
HRNBP3|146713	RNA binding fox-1 homolog 3	DOWN	DOWN	-1.5285	3.71019e-07	1.5285	496.3	1477.6	2.12	2.32	2.13	2.62	4.52	6.87
DMBT1|1755	deleted in malignant brain tumors 1	DOWN	DOWN	-1.52422	3.45153e-07	1.52422	1136.07	3708.69	4.86	5.83	4.33	4.3	18.76	18.47	0	88
SFTPA1|653509	surfactant protein A1	DOWN	DOWN	-1.51971	1.49657e-07	1.51971	400.07	1671.71	1.71	2.63	3.66	5.2	13.38	27
ERBB2|2064	erb-b2 receptor tyrosine kinase 2	UP	UP	1.51384	6.96348e-33	1.51384	2839.79	7471.84	12.14	11.75	1.82	1.23	3.3	1.5	16	16
APOH|350	apolipoprotein H	DOWN	DOWN	-1.51208	1.27999e-09	1.51208	198.77	820.91	0.85	1.29	1.75	2.28	3.07	5.22
CNN1|1264	calponin 1	DOWN	DOWN	-1.51032	2.15032e-11	1.51032	1752.07	4817.96	7.49	7.58	2.22	2.61	4.93	6.84
DNAH8|1769	dynein axonemal heavy chain 8	UP	UP	1.5082	0.00237414	1.5082	263.4	782.71	1.13	1.23	1.4	1.16	1.96	1.36
MS4A1|931	membrane spanning 4-domains A1	DOWN	DOWN	-1.50499	5.29703e-06	1.50499	778.04	2713.11	3.32	4.27	2.54	2.98	6.44	8.85
MS4A8B|83661	membrane spanning 4-domains A8	DOWN	DOWN	-1.49534	1.93295e-05	1.49534	496.24	1978.64	2.12	3.11	2.66	3.4	7.07	11.54	0	88
CLEC18C|283971	C-type lectin domain family 18 member C	UP	UP	1.48788	1.93125e-10	1.48788	408.36	944.53	1.75	1.49	1.97	1.66	3.87	2.76
LOC153328|153328	solute carrier family 25 member 48	DOWN	DOWN	-1.48675	8.20224e-07	1.48675	404.32	1401.43	1.73	2.2	2.07	2.67	4.28	7.12
ITGA8|8516	integrin subunit alpha 8	DOWN	DOWN	-1.48574	2.47557e-13	1.48574	926.5	2816.55	3.96	4.43	2.03	2.34	4.13	5.48
LYVE1|10894	lymphatic vessel endothelial hyaluronan receptor 1	UP	UP	1.48317	2.19496e-17	1.48317	1286.97	3705.15	5.5	5.83	2.11	1.82	4.44	3.31
CASQ2|845	calsequestrin 2	DOWN	DOWN	-1.48284	0.000784101	1.48284	846.9	2477.58	3.62	3.9	2.46	2.61	6.03	6.83
B3GNT6|192134	UDP-GlcNAc:betaGal beta-1,3-N-acetylglucosaminyltransferase 6	DOWN	DOWN	-1.48096	3.59482e-08	1.48096	340.47	1501.93	1.45	2.36	2.25	2.84	5.06	8.08
NODAL|4838	nodal growth differentiation factor	UP	UP	1.47995	1.36783e-21	1.47995	653.53	1439	2.79	2.26	1.77	1.28	3.12	1.63
PGR|5241	progesterone receptor	DOWN	DOWN	-1.47917	5.15428e-11	1.47917	1083.31	3772.27	4.63	5.93	2.46	3.09	6.06	9.54	28	28
KLK4|9622	kallikrein related peptidase 4	UP	UP	1.47771	4.30942e-08	1.47771	486.87	1489.16	2.08	2.34	2.08	2.2	4.34	4.84
MYH7B|57644	myosin heavy chain 7B	DOWN	DOWN	-1.47448	6.1992e-06	1.47448	780.12	2446.46	3.33	3.85	1.49	2.24	2.21	5.03
LDLRAD1|388633	low density lipoprotein receptor class A domain containing 1	DOWN	DOWN	-1.46979	8.72469e-06	1.46979	204.4	1130.94	0.87	1.78	1.53	2.28	2.33	5.21	34	111
CYP3A7|1551	cytochrome P450 family 3 subfamily A member 7	DOWN	DOWN	-1.45785	0.00827437	1.45785	252.31	796.91	1.08	1.25	1.43	1.61	2.03	2.59
SLC6A4|6532	solute carrier family 6 member 4	DOWN	DOWN	-1.44467	0.01683	1.44467	485.81	1267.75	2.08	1.99	1.77	2.11	3.14	4.45
KLRC2|3822	killer cell lectin like receptor C2	DOWN	DOWN	-1.44398	5.30624e-09	1.44398	631.3	2159.59	2.7	3.4	2.02	2.55	4.08	6.52
HMGCLL1|54511	3-hydroxymethyl-3-methylglutaryl-CoA lyase like 1	DOWN	DOWN	-1.44229	2.33396e-08	1.44229	434.95	1579.98	1.86	2.48	1.73	2.32	3	5.39
SPINK5|11005	serine peptidase inhibitor, Kazal type 5	DOWN	DOWN	-1.44173	4.24677e-11	1.44173	1327.93	3964.14	5.67	6.23	3.63	3.9	13.19	15.2
HOXA2|3199	homeobox A2	UP	UP	1.43969	9.35506e-16	1.43969	950.88	2011.14	4.06	3.16	1.94	1.86	3.78	3.48	162	195
CD248|57124	CD248 molecule	UP	UP	1.43942	4.26522e-22	1.43942	2206.57	5713.04	9.43	8.98	1.72	1.64	2.95	2.7
ARC|23237	activity regulated cytoskeleton associated protein	UP	UP	1.4381	6.25965e-11	1.4381	1112.93	2749.13	4.76	4.32	3.04	2.37	9.25	5.61
CNR2|1269	cannabinoid receptor 2	DOWN	DOWN	-1.43424	6.6656e-10	1.43424	239.53	972.64	1.02	1.53	1.18	1.67	1.39	2.79	13	13
LANCL2|55915	LanC like 2	UP	UP	1.43368	3.05947e-29	1.43368	2225.46	5842.94	9.51	9.19	1.48	0.82	2.19	0.67
LMO1|4004	LIM domain only 1	UP	UP	1.43147	1.3778e-07	1.43147	636.45	1382.48	2.72	2.17	2.74	2.13	7.52	4.56
ST8SIA5|29906	ST8 alpha-N-acetyl-neuraminide alpha-2,8-sialyltransferase 5	UP	UP	1.42369	3.73058e-10	1.42369	620.35	1431.67	2.65	2.25	2.45	1.86	6.01	3.47
GRB7|2886	growth factor receptor bound protein 7	UP	UP	1.42275	1.7317e-12	1.42275	1932.65	5161.33	8.26	8.12	3.76	3.2	14.14	10.21	16	16
HMP19|51617	neuronal vesicle trafficking associated 2	DOWN	DOWN	-1.41968	0.000243387	1.41968	474.86	1357.15	2.03	2.13	3.08	3.55	9.47	12.62
CRABP1|1381	cellular retinoic acid binding protein 1	UP	UP	1.41455	1.02335e-05	1.41455	950.42	2122.09	4.06	3.34	3.55	3.02	12.6	9.13
EBF2|64641	early B cell factor 2	UP	UP	1.41209	3.08837e-11	1.41209	499.05	1140.93	2.13	1.79	1.95	1.68	3.82	2.81
FAM81B|153643	family with sequence similarity 81 member B	DOWN	DOWN	-1.4041	1.22078e-05	1.4041	316.12	1473.79	1.35	2.32	1.8	2.59	3.22	6.69	19	19
PGAP3|93210	post-GPI attachment to proteins 3	UP	UP	1.40194	1.67689e-27	1.40194	2302.34	6046.5	9.84	9.51	1.39	0.79	1.93	0.62
SCGB3A1|92304	secretoglobin family 3A member 1	DOWN	DOWN	-1.39625	2.06418e-06	1.39625	705.76	2671.97	3.02	4.2	3.27	3.94	10.68	15.5
PRL|5617	prolactin	DOWN	DOWN	-1.39586	0.00956805	1.39586	154.29	382.68	0.66	0.6	1.25	1.24	1.56	1.54
TAT|6898	tyrosine aminotransferase	DOWN	DOWN	-1.39582	0.00444951	1.39582	305.49	975.48	1.31	1.53	1.6	1.9	2.56	3.59
SLC26A10|65012	solute carrier family 26 member 10	UP	UP	1.39304	8.45492e-15	1.39304	936.28	2244.3	4	3.53	2.24	1.82	5	3.33
TSPAN8|7103	tetraspanin 8	DOWN	DOWN	-1.38935	1.94037e-06	1.38935	1143.28	3910.72	4.89	6.15	4.41	4.18	19.46	17.49
DTHD1|401124	death domain containing 1	DOWN	DOWN	-1.38755	3.42841e-12	1.38755	402.97	1655.51	1.72	2.6	1.46	1.84	2.15	3.37	168	168
KCNB1|3745	potassium voltage-gated channel subfamily B member 1	DOWN	DOWN	-1.38662	8.19797e-07	1.38662	515.2	1644.38	2.2	2.59	2.2	2.75	4.86	7.54
TMEM146|257062	cation channel sperm associated auxiliary subunit delta	DOWN	DOWN	-1.3853	0.000280005	1.3853	103.02	606.07	0.44	0.95	0.87	1.68	0.75	2.83
TTR|7276	transthyretin	UP	UP	1.38509	1.71745e-06	1.38509	289.8	568.45	1.24	0.89	2.24	1.88	5	3.54
C19orf77|284422	small integral membrane protein 24	UP	UP	1.38196	1.15452e-08	1.38196	893.7	2509.1	3.82	3.95	3.24	3.05	10.51	9.31
SLC24A4|123041	solute carrier family 24 member 4	DOWN	DOWN	-1.37519	4.13036e-11	1.37519	593.26	1921.27	2.54	3.02	1.79	2.09	3.21	4.39
ALDOB|229	aldolase, fructose-bisphosphate B	DOWN	DOWN	-1.37458	1.95965e-08	1.37458	589.17	1767.92	2.52	2.78	2.68	2.71	7.19	7.32
ACAN|176	aggrecan	DOWN	DOWN	-1.3652	0.00414437	1.3652	1410.35	3749.08	6.03	5.89	1.89	2.07	3.57	4.3
COL19A1|1310	collagen type XIX alpha 1 chain	DOWN	DOWN	-1.36387	6.83302e-09	1.36387	345.18	1173.18	1.48	1.84	1.58	2.08	2.5	4.34
KLHDC8A|55220	kelch domain containing 8A	UP	UP	1.35574	9.35426e-10	1.35574	1118.2	2851.21	4.78	4.48	2.96	2.28	8.76	5.2
CSMD3|114788	CUB and Sushi multiple domains 3	DOWN	DOWN	-1.35563	0.000125734	1.35563	444.96	1246.05	1.9	1.96	2.31	3.02	5.33	9.1
ANKRD55|79722	ankyrin repeat domain 55	DOWN	DOWN	-1.34734	7.32757e-09	1.34734	345.86	1141.82	1.48	1.8	1.19	1.55	1.42	2.4
EGFR|1956	epidermal growth factor receptor	UP	UP	1.34387	7.9385e-18	1.34387	2402.29	6134.3	10.27	9.65	2.54	1.95	6.43	3.79	195	195
SLC28A1|9154	solute carrier family 28 member 1	UP	UP	1.34346	7.2595e-10	1.34346	444.01	1019.51	1.9	1.6	1.77	1.36	3.14	1.84
WT1|7490	Wilms tumor 1	UP	UP	1.34343	5.29703e-06	1.34343	847.69	1971.95	3.62	3.1	3.11	2.82	9.65	7.95
PHYHIPL|84457	phytanoyl-CoA 2-hydroxylase interacting protein like	DOWN	DOWN	-1.33904	4.48691e-06	1.33904	998	3169.3	4.26	4.98	3.38	3.64	11.43	13.23
VAT1L|57687	vesicle amine transport 1 like	DOWN	DOWN	-1.33818	5.29021e-08	1.33818	1014.02	2823.46	4.33	4.44	2.45	2.91	6.01	8.49
MEP1A|4224	meprin A subunit alpha	UP	UP	1.33655	6.43896e-08	1.33655	525.69	1513.93	2.25	2.38	2.47	2.24	6.09	5.02
GAL|51083	galanin and GMAP prepropeptide	UP	UP	1.33611	2.66426e-07	1.33611	992.62	1994.1	4.24	3.14	2.88	2.58	8.28	6.66	19	19
CLCA4|22802	chloride channel accessory 4	DOWN	DOWN	-1.335	3.18377e-06	1.335	793.86	2472.75	3.39	3.89	3.3	3.71	10.9	13.75
FAM123C|205147	APC membrane recruitment protein 3	DOWN	DOWN	-1.33433	2.00211e-08	1.33433	258.47	903.64	1.1	1.42	1.81	2.47	3.28	6.12
CPLX2|10814	complexin 2	DOWN	DOWN	-1.32302	1.97955e-07	1.32302	632.92	2095.71	2.7	3.3	3.42	4	11.7	15.98
TSPAN31|6302	tetraspanin 31	UP	UP	1.31851	1.67532e-44	1.31851	2375.57	6202.66	10.15	9.75	1.44	0.7	2.08	0.49	190	190
LRRN2|10446	leucine rich repeat neuronal 2	UP	UP	1.31681	1.34306e-10	1.31681	1569.26	4272.66	6.71	6.72	2.9	2.57	8.41	6.59
HMGCS2|3158	3-hydroxy-3-methylglutaryl-CoA synthase 2	UP	UP	1.31418	0.00105014	1.31418	860.21	2169.75	3.68	3.41	4.51	3.8	20.36	14.46
METTL1|4234	methyltransferase like 1	UP	UP	1.31072	6.72235e-52	1.31072	2122.01	5394.29	9.07	8.48	1.23	0.68	1.51	0.46	197	200
DPT|1805	dermatopontin	UP	UP	1.30852	0.00232861	1.30852	1352.23	3770.43	5.78	5.93	3.18	3.03	10.12	9.2
MUC2|4583	mucin 2, oligomeric mucus/gel-forming	DOWN	DOWN	-1.30467	0.000615468	1.30467	666.14	1993.76	2.85	3.13	3.52	3.47	12.41	12.04
SLC35E3|55508	solute carrier family 35 member E3	UP	UP	1.30383	2.53223e-37	1.30383	1901.68	4994.26	8.13	7.85	1.38	0.73	1.9	0.53	17	194
CLEC18A|348174	C-type lectin domain family 18 member A	UP	UP	1.29742	3.1959e-15	1.29742	966.39	2347.31	4.13	3.69	2.01	1.65	4.06	2.72
LMOD1|25802	leiomodin 1	DOWN	DOWN	-1.29531	1.07411e-11	1.29531	1799.41	5108.92	7.69	8.03	1.71	1.99	2.93	3.98
IL17REL|400935	interleukin 17 receptor E like	DOWN	DOWN	-1.29167	6.64242e-06	1.29167	323.93	1077.9	1.38	1.69	1.78	2.02	3.15	4.09
PIPOX|51268	pipecolic acid and sarcosine oxidase	UP	UP	1.27972	2.7593e-11	1.27972	1244.75	3124.92	5.32	4.91	2.59	2.02	6.71	4.08
SPIB|6689	Spi-B transcription factor	DOWN	DOWN	-1.27858	6.78669e-07	1.27858	805.19	2666.88	3.44	4.19	2.2	2.58	4.83	6.65
RHBG|57127	Rh family B glycoprotein (gene/pseudogene)	UP	UP	1.27805	3.21178e-13	1.27805	623.58	1306.23	2.66	2.05	2.35	1.88	5.52	3.54
KRTAP5-10|387273	keratin associated protein 5-10	UP	UP	1.27775	2.7454e-08	1.27775	228.09	552.63	0.97	0.87	1.27	1.1	1.61	1.21
BHMT|635	betaine--homocysteine S-methyltransferase	UP	UP	1.27035	3.9829e-24	1.27035	496.81	1145.71	2.12	1.8	2.61	1.83	6.8	3.35
CCDC37|348807	cilia and flagella associated protein 100	DOWN	DOWN	-1.26815	0.000319068	1.26815	197.99	956.05	0.85	1.5	1.54	2.33	2.38	5.41
MUC13|56667	mucin 13, cell surface associated	DOWN	DOWN	-1.26812	0.000103604	1.26812	928.52	3102.28	3.97	4.88	4.39	4.46	19.3	19.89
GRM5|2915	glutamate metabotropic receptor 5	DOWN	DOWN	-1.26178	1.12485e-08	1.26178	509.69	1692.07	2.18	2.66	2.3	2.66	5.27	7.1
PLA2G2A|5320	phospholipase A2 group IIA	UP	UP	1.26088	5.28323e-05	1.26088	1244.88	2896.19	5.32	4.55	3.86	3.66	14.91	13.43
SLC10A4|201780	solute carrier family 10 member 4	UP	UP	1.25886	9.38122e-05	1.25886	759.14	1818	3.24	2.86	2.45	2.18	6	4.74
CCDC108|255101	cilia and flagella associated protein 65	DOWN	DOWN	-1.25811	1.06653e-06	1.25811	429.35	1864.43	1.83	2.93	1.85	2.61	3.43	6.82	151	151
H2AFB1|474382	H2A histone family member B1	UP	UP	1.25329	2.1017e-10	1.25329	346.78	927.22	1.48	1.46	1.31	1.3	1.71	1.69
KRT13|3860	keratin 13	DOWN	DOWN	-1.24747	0.000330308	1.24747	1344.05	3858.94	5.74	6.07	5.44	5.72	29.6	32.75
GNGT1|2792	G protein subunit gamma transducin 1	UP	UP	1.24182	2.12214e-06	1.24182	439.59	1084.72	1.88	1.71	1.76	1.74	3.11	3.02
PRAP1|118471	proline rich acidic protein 1	UP	UP	1.23727	0.00015173	1.23727	658.6	1656.09	2.81	2.6	3.26	2.96	10.6	8.76
DES|1674	desmin	DOWN	DOWN	-1.23595	3.70539e-05	1.23595	1716.31	4515.92	7.33	7.1	3.55	4.05	12.63	16.42
APOBEC1|339	apolipoprotein B mRNA editing enzyme catalytic subunit 1	DOWN	DOWN	-1.23503	0.00694123	1.23503	223.4	680.83	0.95	1.07	1.92	1.94	3.68	3.76
WDR49|151790	WD repeat domain 49	DOWN	DOWN	-1.23123	1.68427e-05	1.23123	421.94	1761.16	1.8	2.77	2.15	2.53	4.63	6.38
FTCD|10841	formimidoyltransferase cyclodeaminase	UP	UP	1.23085	1.62812e-07	1.23085	465.99	1016.6	1.99	1.6	1.87	1.55	3.5	2.41
MIA2|117153	MIA SH3 domain ER export factor 2	DOWN	DOWN	-1.23016	0.000290474	1.23016	281.76	1168.04	1.2	1.84	1.94	2.23	3.77	4.96
EYA4|2070	EYA transcriptional coactivator and phosphatase 4	UP	UP	1.22898	1.0203e-07	1.22898	1050.64	2267.85	4.49	3.57	2.68	2.41	7.2	5.82	23	23
ARMC3|219681	armadillo repeat containing 3	DOWN	DOWN	-1.22465	4.87371e-05	1.22465	503.94	2168.29	2.15	3.41	2.37	3.09	5.63	9.55	30	30
MEGF11|84465	multiple EGF like domains 11	DOWN	DOWN	-1.22222	1.07755e-05	1.22222	664.85	2173.99	2.84	3.42	2.65	3.13	7.01	9.8
KCNIP2|30819	potassium voltage-gated channel interacting protein 2	DOWN	DOWN	-1.22098	1.0675e-09	1.22098	1008.6	2873.15	4.31	4.52	1.68	2.14	2.81	4.58
BTNL8|79908	butyrophilin like 8	DOWN	DOWN	-1.22024	3.35108e-06	1.22024	503.49	1339.32	2.15	2.11	2.52	2.38	6.36	5.67
RASL10A|10633	RAS like family 10 member A	DOWN	DOWN	-1.21294	1.97297e-08	1.21294	725.31	2069.08	3.1	3.25	1.86	2.25	3.46	5.07
HSPA6|3310	heat shock protein family A (Hsp70) member 6	UP	UP	1.21101	0.00862947	1.21101	1845.01	4813.3	7.88	7.57	1.7	1.6	2.89	2.55
HPR|3250	haptoglobin-related protein	DOWN	DOWN	-1.21055	0.000521025	1.21055	359.91	1614.64	1.54	2.54	2.13	2.98	4.55	8.86
TMEM72|643236	transmembrane protein 72	DOWN	DOWN	-1.20972	0.000160076	1.20972	69.11	394.24	0.3	0.62	0.87	1.2	0.77	1.44
MADCAM1|8174	mucosal vascular addressin cell adhesion molecule 1	DOWN	DOWN	-1.20972	2.78781e-08	1.20972	364.17	1258.69	1.56	1.98	1.44	1.78	2.08	3.15
PSD|5662	pleckstrin and Sec7 domain containing	DOWN	DOWN	-1.2094	3.18894e-09	1.2094	1362.01	3992.67	5.82	6.28	2.02	2.28	4.08	5.21
CHGB|1114	chromogranin B	DOWN	DOWN	-1.2068	7.87715e-05	1.2068	928.78	2705.9	3.97	4.25	3.06	3.56	9.33	12.68
LIPC|3990	lipase C, hepatic type	UP	UP	1.20488	1.47551e-09	1.20488	772.86	1851.22	3.3	2.91	2.12	1.77	4.51	3.12
RASGRF1|5923	Ras protein specific guanine nucleotide releasing factor 1	DOWN	DOWN	-1.20479	1.22505e-08	1.20479	1080.17	3507.12	4.62	5.51	2.26	2.72	5.12	7.38
ROS1|6098	ROS proto-oncogene 1, receptor tyrosine kinase	DOWN	DOWN	-1.20351	0.00025584	1.20351	636.07	2126.04	2.72	3.34	2.97	3.53	8.82	12.49
TUBA4B|80086	tubulin alpha 4b	DOWN	DOWN	-1.20288	5.51352e-05	1.20288	250.99	1021.44	1.07	1.61	1.44	2.01	2.07	4.03	0	111
FAM129C|199786	family with sequence similarity 129 member C	DOWN	DOWN	-1.19931	0.000133928	1.19931	437.69	1398.03	1.87	2.2	1.21	1.58	1.47	2.48
KIAA1409|57578	unc-79 homolog%2C NALCN channel complex subunit	DOWN	DOWN	-1.19748	7.30619e-07	1.19748	714.73	2169.15	3.05	3.41	2.18	2.51	4.77	6.32
REG1A|5967	regenerating family member 1 alpha	UP	UP	1.19637	0.0118753	1.19637	504.1	1367	2.15	2.15	3.94	3.56	15.49	12.66
TRIM67|440730	tripartite motif containing 67	DOWN	DOWN	-1.1938	0.00134226	1.1938	567.88	1583.52	2.43	2.49	2.03	2.45	4.14	5.99
REG4|83998	regenerating family member 4	DOWN	DOWN	-1.1927	0.000962736	1.1927	566.4	1357.23	2.42	2.13	4.18	3.69	17.45	13.6
EFCAB3|146779	EF-hand calcium binding domain 3	UP	UP	1.18666	4.10035e-08	1.18666	198.11	502.77	0.85	0.79	0.88	0.88	0.77	0.78
USH1C|10083	USH1 protein network component harmonin	DOWN	DOWN	-1.18618	0.000225598	1.18618	871.07	2798.05	3.72	4.4	3.63	3.98	13.2	15.83
SYNPO2|171024	synaptopodin 2	DOWN	DOWN	-1.18101	7.5657e-10	1.18101	1980.47	5738.18	8.46	9.02	1.97	2.12	3.89	4.48
COL9A3|1299	collagen type IX alpha 3 chain	UP	UP	1.17904	1.13784e-07	1.17904	1426.64	3409.14	6.1	5.36	2.78	2.34	7.75	5.46
MYOC|4653	myocilin	UP	UP	1.17552	0.00584058	1.17552	410.05	1315.56	1.75	2.07	2.42	2.29	5.83	5.23
PTH2R|5746	parathyroid hormone 2 receptor	UP	UP	1.17437	3.21467e-05	1.17437	711.98	1707.59	3.04	2.68	2.97	2.61	8.83	6.83
FAM179A|165186	TOG array regulator of axonemal microtubules 2	DOWN	DOWN	-1.17279	4.39411e-12	1.17279	784.89	2702.82	3.35	4.25	1.51	1.94	2.27	3.78	115	115
ADRA1D|146	adrenoceptor alpha 1D	UP	UP	1.172	0.00318146	1.172	686.39	1539.96	2.93	2.42	2.02	1.64	4.08	2.69
LRRC18|474354	leucine rich repeat containing 18	DOWN	DOWN	-1.16833	4.73012e-06	1.16833	212.33	953.49	0.91	1.5	1.18	1.77	1.39	3.15
C1orf187|374946	dorsal inhibitory axon guidance protein	UP	UP	1.16503	1.07573e-08	1.16503	652.4	1521.23	2.79	2.39	2.12	1.63	4.5	2.67
SNX31|169166	sorting nexin 31	UP	UP	1.16453	0.0329886	1.16453	698.45	1492.89	2.98	2.35	3.11	2.59	9.7	6.72
B4GALNT1|2583	beta-1,4-N-acetyl-galactosaminyltransferase 1	UP	UP	1.16218	8.24112e-10	1.16218	1477.39	3600.2	6.31	5.66	2.53	2.33	6.38	5.45
SNAP91|9892	synaptosome associated protein 91	DOWN	DOWN	-1.16061	0.000596031	1.16061	626.73	1775.61	2.68	2.79	2.9	3.3	8.4	10.89
PPYR1|5540	neuropeptide Y receptor Y4	DOWN	DOWN	-1.16058	0.000211736	1.16058	505.85	1542.63	2.16	2.43	1.71	1.96	2.93	3.83
GCGR|2642	glucagon receptor	UP	UP	1.15907	0.000824669	1.15907	285.18	590.24	1.22	0.93	1.77	1.44	3.13	2.09
GPR25|2848	G protein-coupled receptor 25	DOWN	DOWN	-1.15775	3.13135e-07	1.15775	264.78	1092.5	1.13	1.72	1.42	1.71	2.03	2.94
GRIN1|2902	glutamate ionotropic receptor NMDA type subunit 1	DOWN	DOWN	-1.15708	8.97586e-10	1.15708	831.64	2571.6	3.55	4.04	2.41	2.66	5.79	7.07
FRMD1|79981	FERM domain containing 1	DOWN	DOWN	-1.15456	0.00127112	1.15456	225.75	655.76	0.96	1.03	1.44	1.54	2.06	2.38
UGT3A2|167127	UDP glycosyltransferase family 3 member A2	UP	UP	1.14921	0.000253796	1.14921	408.98	1054.7	1.75	1.66	1.98	1.67	3.93	2.79
ACTG2|72	actin, gamma 2, smooth muscle, enteric	DOWN	DOWN	-1.14782	7.25561e-06	1.14782	1891.04	4999.53	8.08	7.86	2.68	3.12	7.16	9.73
P2RX2|22953	purinergic receptor P2X 2	UP	UP	1.14326	0.0476078	1.14326	309.22	911.05	1.32	1.43	1.9	1.66	3.59	2.76
WIF1|11197	WNT inhibitory factor 1	DOWN	DOWN	-1.14308	0.00118295	1.14308	544.2	2283.39	2.33	3.59	2.76	3.51	7.61	12.35
BPIL1|80341	BPI fold containing family B member 2	DOWN	DOWN	-1.14218	0.0181734	1.14218	295.57	1107.37	1.26	1.74	2.46	2.95	6.04	8.73
MYOCD|93649	myocardin	DOWN	DOWN	-1.1411	7.4097e-20	1.1411	734	2254.41	3.14	3.54	2.35	2.49	5.51	6.22
OGN|4969	osteoglycin	UP	UP	1.13566	2.76958e-05	1.13566	1089.75	3069.9	4.66	4.83	3.11	2.88	9.7	8.28
ELN|2006	elastin	UP	UP	1.12964	4.95709e-10	1.12964	2181.38	5920.1	9.32	9.31	2.65	2	7.04	3.99
PLAC8|51316	placenta specific 8	DOWN	DOWN	-1.12942	4.30944e-08	1.12942	1319.5	3957.45	5.64	6.22	2.55	2.77	6.51	7.67
CST1|1469	cystatin SN	DOWN	DOWN	-1.12635	0.000342568	1.12635	1247.53	3705.81	5.33	5.83	3.83	4.07	14.67	16.54
CUX2|23316	cut like homeobox 2	DOWN	DOWN	-1.12581	2.41983e-08	1.12581	518.88	1842.49	2.22	2.9	2.14	2.66	4.57	7.08
UNC80|285175	unc-80 homolog, NALCN channel complex subunit	DOWN	DOWN	-1.12567	0.000213626	1.12567	587.48	1643.54	2.51	2.58	2.76	3.06	7.64	9.39
RP1|6101	RP1, axonemal microtubule associated	DOWN	DOWN	-1.12479	3.3163e-06	1.12479	463.92	1728.4	1.98	2.72	1.7	2.16	2.9	4.69
GRIK1|2897	glutamate ionotropic receptor kainate type subunit 1	UP	UP	1.12048	0.000175306	1.12048	499.01	1042.9	2.13	1.64	2.82	1.91	7.97	3.65
FER1L6|654463	fer-1 like family member 6	DOWN	DOWN	-1.11663	0.00031199	1.11663	576.45	1627.21	2.46	2.56	2.92	2.64	8.51	6.96
NKD1|85407	naked cuticle homolog 1	DOWN	DOWN	-1.11402	3.59643e-08	1.11402	1216.93	3695.92	5.2	5.81	1.87	2.27	3.51	5.14
BAAT|570	bile acid-CoA:amino acid N-acyltransferase	UP	UP	1.11328	0.000122385	1.11328	522.43	1510.43	2.23	2.37	2.39	2.29	5.72	5.22
CD1C|911	CD1c molecule	DOWN	DOWN	-1.11316	5.30624e-09	1.11316	812.2	2663.1	3.47	4.19	1.97	2.22	3.88	4.94
SGCA|6442	sarcoglycan alpha	DOWN	DOWN	-1.11285	1.17178e-06	1.11285	834.37	2442.15	3.57	3.84	2.14	2.4	4.59	5.78
CLEC9A|283420	C-type lectin domain containing 9A	DOWN	DOWN	-1.11087	3.44198e-07	1.11087	413.35	1491.28	1.77	2.34	1.54	1.87	2.38	3.49
CST4|1472	cystatin S	DOWN	DOWN	-1.11062	0.000414262	1.11062	429.66	1412.55	1.84	2.22	2.02	2.58	4.1	6.66
SEZ6L|23544	seizure related 6 homolog like	DOWN	DOWN	-1.10758	0.0027012	1.10758	469	1625.67	2	2.56	3.41	3.66	11.62	13.37
ADAM28|10863	ADAM metallopeptidase domain 28	DOWN	DOWN	-1.10736	1.5338e-13	1.10736	1530.71	4821.44	6.54	7.58	1.94	2.03	3.76	4.13	193	193
CPA3|1359	carboxypeptidase A3	UP	UP	1.10644	0.000688593	1.10644	1228.11	3738.26	5.25	5.88	3.07	3.14	9.44	9.88
ZNF385B|151126	zinc finger protein 385B	DOWN	DOWN	-1.1057	1.34341e-06	1.1057	806.09	2939.37	3.44	4.62	2.31	2.64	5.35	6.97	90	90
TM4SF5|9032	transmembrane 4 L six family member 5	DOWN	DOWN	-1.10339	0.0144069	1.10339	360.71	905.05	1.54	1.42	3.04	2.78	9.21	7.7
MIA|8190	MIA SH3 domain containing	DOWN	DOWN	-1.10256	0.000219159	1.10256	811.75	2372.16	3.47	3.73	2.92	3.17	8.51	10.07
CSDC2|27254	cold shock domain containing C2	DOWN	DOWN	-1.10018	5.95963e-07	1.10018	1096.66	3479.39	4.69	5.47	2.33	2.67	5.42	7.11
FIGF|2277	vascular endothelial growth factor D	UP	UP	1.09706	3.21666e-05	1.09706	670.68	1834.32	2.87	2.88	2.3	2	5.27	4
GRIN3A|116443	glutamate ionotropic receptor NMDA type subunit 3A	DOWN	DOWN	-1.09599	4.44417e-11	1.09599	931.25	2793.35	3.98	4.39	1.23	1.62	1.52	2.62
CLLU1OS|574016	chronic lymphocytic leukemia up-regulated 1 opposite strand	UP	UP	1.09396	0.012351	1.09396	224.84	543.68	0.96	0.85	1.35	1.13	1.82	1.27
KRT4|3851	keratin 4	DOWN	DOWN	-1.09352	3.60579e-05	1.09352	967.25	2903.02	4.13	4.56	4.09	4.54	16.76	20.62
C20orf114|92747	BPI fold containing family B member 1	DOWN	DOWN	-1.09197	0.00590292	1.09197	866.96	2772.57	3.7	4.36	4.03	4.42	16.28	19.52
PRSS50|29122	serine protease 50	UP	UP	1.08843	0.000138523	1.08843	629.13	1640.86	2.69	2.58	2.48	2.27	6.17	5.14
PLAC1|10761	placenta specific 1	UP	UP	1.08842	5.36352e-07	1.08842	799.77	1619.46	3.42	2.55	2.25	2.02	5.05	4.08
NKAIN1|79570	sodium/potassium transporting ATPase interacting 1	UP	UP	1.08633	0.00230324	1.08633	1086.98	2452.92	4.65	3.86	2.81	2.71	7.87	7.36	15	15
SLC30A2|7780	solute carrier family 30 member 2	UP	UP	1.08299	0.000219346	1.08299	671.18	1672.44	2.87	2.63	2.82	2.42	7.98	5.88
VPREB3|29802	V-set pre-B cell surrogate light chain 3	DOWN	DOWN	-1.0826	0.00113254	1.0826	655.39	2078.78	2.8	3.27	1.67	1.85	2.79	3.42
CCR4|1233	C-C motif chemokine receptor 4	DOWN	DOWN	-1.08061	1.62718e-08	1.08061	730.09	2372.77	3.12	3.73	1.8	2.22	3.26	4.92	115	115
DYSFIP1|116729	protein phosphatase 1 regulatory subunit 27	DOWN	DOWN	-1.07971	0.0166455	1.07971	244.3	652.12	1.04	1.03	1.51	1.72	2.28	2.94
TCTE1|202500	t-complex-associated-testis-expressed 1	DOWN	DOWN	-1.07832	8.90908e-06	1.07832	284.82	1177.39	1.22	1.85	1.31	1.96	1.71	3.85
GALNT13|114805	polypeptide N-acetylgalactosaminyltransferase 13	DOWN	DOWN	-1.07596	0.000107787	1.07596	998.6	2705.09	4.27	4.25	2.91	3.55	8.44	12.58
KLRC3|3823	killer cell lectin like receptor C3	DOWN	DOWN	-1.07114	1.88529e-05	1.07114	491.15	1681.17	2.1	2.64	1.93	2.43	3.72	5.92
ENDOU|8909	endonuclease, poly(U) specific	DOWN	DOWN	-1.06762	5.47675e-07	1.06762	664.24	2025.42	2.84	3.18	2.12	2.46	4.48	6.03
C22orf15|150248	chromosome 22 open reading frame 15	DOWN	DOWN	-1.0668	1.57143e-07	1.0668	314.4	1187.41	1.34	1.87	1.08	1.78	1.17	3.17
CALB2|794	calbindin 2	UP	UP	1.06378	0.00328384	1.06378	1132.7	3001.17	4.84	4.72	2.89	2.56	8.38	6.55
SVOP|55530	SV2 related protein	DOWN	DOWN	-1.06325	0.00115837	1.06325	354.69	1033.22	1.52	1.62	2.12	2.65	4.49	7.01
MRVI1|10335	murine retrovirus integration site 1 homolog	DOWN	DOWN	-1.06164	2.88851e-12	1.06164	1902.21	5421.76	8.13	8.52	1.49	1.76	2.23	3.09
CD36|948	CD36 molecule	UP	UP	1.05921	2.02718e-07	1.05921	1757.45	4580.35	7.51	7.2	2.65	2.35	7	5.51
CDHR3|222256	cadherin related family member 3	DOWN	DOWN	-1.05909	8.31624e-08	1.05909	1009.21	3055.4	4.31	4.8	1.78	2.26	3.16	5.13
FCRL2|79368	Fc receptor like 2	DOWN	DOWN	-1.05885	6.18507e-05	1.05885	464.04	1682.18	1.98	2.64	1.94	2.24	3.76	5.04
UPK2|7379	uroplakin 2	UP	UP	1.05855	4.55676e-12	1.05855	877.02	1996.62	3.75	3.14	3.6	2.72	13	7.38
EPS8L3|79574	EPS8 like 3	DOWN	DOWN	-1.05777	0.00899578	1.05777	577.34	1988.38	2.47	3.13	3.89	3.95	15.13	15.59
GPR128|84873	adhesion G protein-coupled receptor G7	DOWN	DOWN	-1.05742	0.00986901	1.05742	413.97	994.53	1.77	1.56	2.57	2.71	6.61	7.33
CXCR5|643	C-X-C motif chemokine receptor 5	DOWN	DOWN	-1.05669	4.91814e-07	1.05669	683.44	2329.43	2.92	3.66	1.82	2.11	3.33	4.44	25	25
CAMK2A|815	calcium/calmodulin dependent protein kinase II alpha	DOWN	DOWN	-1.05574	0.000251101	1.05574	873.6	2402.17	3.73	3.78	2.68	2.9	7.18	8.39
BLK|640	BLK proto-oncogene, Src family tyrosine kinase	DOWN	DOWN	-1.05248	1.21458e-05	1.05248	498.93	1882.61	2.13	2.96	1.96	2.27	3.86	5.15
LRIT2|340745	leucine rich repeat, Ig-like and transmembrane domains 2	DOWN	DOWN	-1.05185	0.00176418	1.05185	213.48	651.15	0.91	1.02	1.12	1.56	1.25	2.44
NEK10|152110	NIMA related kinase 10	DOWN	DOWN	-1.05116	2.31577e-07	1.05116	555.44	1755.73	2.37	2.76	1.46	1.82	2.13	3.31
C9orf24|84688	chromosome 9 open reading frame 24	DOWN	DOWN	-1.04793	4.83105e-06	1.04793	706.15	2289.21	3.02	3.6	1.79	2.6	3.21	6.74
PPARG|5468	peroxisome proliferator activated receptor gamma	UP	UP	1.04555	9.98469e-08	1.04555	1705.67	4458.17	7.29	7.01	2.65	2.29	7.03	5.27
TPSB2|64499	tryptase beta 2 (gene/pseudogene)	UP	UP	1.04205	0.0138337	1.04205	1544.44	4607.61	6.6	7.24	2.97	2.98	8.85	8.86
DMRT1|1761	doublesex and mab-3 related transcription factor 1	UP	UP	1.04122	0.00146971	1.04122	362.96	721.4	1.55	1.13	1.87	1.61	3.49	2.6
GPR17|2840	G protein-coupled receptor 17	DOWN	DOWN	-1.0373	2.89539e-05	1.0373	611.21	1888.2	2.61	2.97	2.54	3.12	6.47	9.77
BCL2L15|440603	BCL2 like 15	DOWN	DOWN	-1.03344	6.36073e-06	1.03344	983.85	3340.62	4.2	5.25	2.66	2.95	7.08	8.69	7	88
CTNNA3|29119	catenin alpha 3	DOWN	DOWN	-1.03148	0.000626423	1.03148	303.12	1032.46	1.3	1.62	1.7	2.15	2.89	4.63
TCF15|6939	transcription factor 15	UP	UP	1.02614	1.7468e-08	1.02614	832.01	1860.84	3.56	2.93	2.04	1.69	4.18	2.84
C20orf201|198437	LKAAEAR motif containing 1	UP	UP	1.0256	1.41568e-05	1.0256	259.86	700.14	1.11	1.1	1.83	1.64	3.33	2.68
SCN3A|6328	sodium voltage-gated channel alpha subunit 3	DOWN	DOWN	-1.02453	0.00014256	1.02453	858.11	2647.77	3.67	4.16	2.76	2.96	7.63	8.74
C19orf59|199675	mast cell expressed membrane protein 1	DOWN	DOWN	-1.02417	4.86351e-05	1.02417	710.2	2011.97	3.04	3.16	2.17	2.55	4.72	6.51
WDR65|149465	cilia and flagella associated protein 57	DOWN	DOWN	-1.02295	2.57413e-06	1.02295	400.49	1416.65	1.71	2.23	1.33	1.74	1.77	3.03
GDF10|2662	growth differentiation factor 10	DOWN	DOWN	-1.02249	8.78849e-08	1.02249	543.28	1995.01	2.32	3.14	2.04	2.52	4.16	6.33
DNAI1|27019	dynein axonemal intermediate chain 1	DOWN	DOWN	-1.02127	0.000760255	1.02127	398.95	1660.99	1.7	2.61	1.88	2.78	3.55	7.72
VTN|7448	vitronectin	UP	UP	1.0197	0.00515686	1.0197	772.75	1899.79	3.3	2.99	2.05	1.93	4.18	3.74
SSTR3|6753	somatostatin receptor 3	DOWN	DOWN	-1.01908	4.94583e-05	1.01908	180.81	756.6	0.77	1.19	0.97	1.3	0.94	1.69
PRKCB|5579	protein kinase C beta	DOWN	DOWN	-1.01829	4.74365e-10	1.01829	1563.78	4654.54	6.68	7.32	1.76	2.07	3.09	4.27
NRAP|4892	nebulin related anchoring protein	DOWN	DOWN	-1.01684	0.00245349	1.01684	347.72	1249.36	1.49	1.96	2.21	2.57	4.87	6.6
SSTR1|6751	somatostatin receptor 1	DOWN	DOWN	-1.01665	9.62628e-05	1.01665	799.55	2631	3.42	4.14	2.69	2.86	7.26	8.18
TLR10|81793	toll like receptor 10	DOWN	DOWN	-1.01195	2.49581e-08	1.01195	839.46	2745.87	3.59	4.32	1.73	1.85	2.98	3.44
CYP3A4|1576	cytochrome P450 family 3 subfamily A member 4	DOWN	DOWN	-1.01052	0.000344403	1.01052	242.33	625.55	1.04	0.98	1.82	1.95	3.33	3.79
TEKT5|146279	tektin 5	UP	UP	1.00956	0.040014	1.00956	428.73	1117.77	1.83	1.76	1.65	1.33	2.71	1.77
GRIA4|2893	glutamate ionotropic receptor AMPA type subunit 4	DOWN	DOWN	-1.00178	0.00578568	1.00178	581.64	1716.58	2.49	2.7	3.32	3.56	11.05	12.68
ACSM5|54988	acyl-CoA synthetase medium chain family member 5	DOWN	DOWN	-1.0002	3.4377e-05	1.0002	611.88	1866.25	2.61	2.93	2.18	2.38	4.75	5.66
CDH4|1002	cadherin 4	UP	UP	0.999376	0.000548754	0.999376	612.31	1401.8	2.62	2.2	3.05	2.56	9.32	6.53
ARMC4|55130	armadillo repeat containing 4	DOWN	DOWN	-0.998819	2.76958e-05	0.998819	508.14	1934.62	2.17	3.04	1.86	2.2	3.47	4.83	13	13
SYNPO2L|79933	synaptopodin 2 like	DOWN	DOWN	-0.997519	0.00630403	0.997519	568.37	1790.63	2.43	2.82	1.87	2.19	3.49	4.82
NAPSA|9476	napsin A aspartic peptidase	DOWN	DOWN	-0.997165	0.0031906	0.997165	843.81	3004.08	3.61	4.72	3.38	4.49	11.42	20.14
ADAMTS16|170690	ADAM metallopeptidase with thrombospondin type 1 motif 16	UP	UP	0.995915	6.36073e-06	0.995915	990.99	2686.68	4.23	4.22	2.47	2.25	6.09	5.07
LMOD3|56203	leiomodin 3	DOWN	DOWN	-0.995552	6.81828e-08	0.995552	573.2	1644.55	2.45	2.59	1.67	1.77	2.8	3.14
STARD3|10948	StAR related lipid transfer domain containing 3	UP	UP	0.991869	1.462e-23	0.991869	2399.38	6339.24	10.25	9.97	1.06	0.55	1.12	0.3	47	47
OS9|10956	OS9, endoplasmic reticulum lectin	UP	UP	0.991186	9.43998e-36	0.991186	3042.35	8085.72	13	12.71	1.14	0.45	1.3	0.2	179	181
HSD17B1|3292	hydroxysteroid 17-beta dehydrogenase 1	UP	UP	0.988663	0.00171292	0.988663	1542.92	4035.04	6.59	6.34	1.48	1.2	2.19	1.45
FCRL6|343413	Fc receptor like 6	DOWN	DOWN	-0.988244	1.22466e-08	0.988244	613.41	2119.84	2.62	3.33	1.45	1.75	2.1	3.06	41	41
C6|729	complement C6	DOWN	DOWN	-0.987825	0.00180669	0.987825	434.3	1600.14	1.86	2.52	2.13	2.5	4.54	6.27
TMSB15A|11013	thymosin beta 15a	UP	UP	0.986818	3.64534e-06	0.986818	1015.39	2573.28	4.34	4.05	2.47	2.1	6.08	4.39
LEFTY1|10637	left-right determination factor 1	DOWN	DOWN	-0.985779	0.000319068	0.985779	840.79	2614.75	3.59	4.11	2.34	2.92	5.48	8.55
HS3ST2|9956	heparan sulfate-glucosamine 3-sulfotransferase 2	DOWN	DOWN	-0.985167	1.6743e-07	0.985167	1006.71	2967.42	4.3	4.67	1.89	2.26	3.57	5.1
TSPO2|222642	translocator protein 2	UP	UP	0.983694	0.000393416	0.983694	160.13	370.9	0.68	0.58	1.21	0.97	1.46	0.94
FRS2|10818	fibroblast growth factor receptor substrate 2	UP	UP	0.983604	2.19457e-12	0.983604	2282.83	6006.29	9.76	9.44	1.25	0.75	1.55	0.57	17	23
GPR15|2838	G protein-coupled receptor 15	DOWN	DOWN	-0.982763	0.000408895	0.982763	358.72	1191.38	1.53	1.87	1.67	2.01	2.78	4.02
GAS2L2|246176	growth arrest specific 2 like 2	DOWN	DOWN	-0.98241	0.0001007	0.98241	454.36	1734.53	1.94	2.73	1.74	2.35	3.03	5.53
C4BPA|722	complement component 4 binding protein alpha	DOWN	DOWN	-0.981184	0.0415697	0.981184	685.12	2684.88	2.93	4.22	3.48	4.35	12.13	18.91
MCF2|4168	MCF.2 cell line derived transforming sequence	DOWN	DOWN	-0.979893	0.000362725	0.979893	358.02	1154.76	1.53	1.82	1.6	2.1	2.55	4.42
ADAMTS5|11096	ADAM metallopeptidase with thrombospondin type 1 motif 5	UP	UP	0.976132	2.86648e-11	0.976132	1615.43	4340.78	6.9	6.83	1.73	1.5	2.98	2.26
RETN|56729	resistin	DOWN	DOWN	-0.975605	0.0303016	0.975605	264.85	802.26	1.13	1.26	1.42	1.75	2.01	3.06
UNC45B|146862	unc-45 myosin chaperone B	DOWN	DOWN	-0.974347	4.71502e-08	0.974347	336.97	1058.11	1.44	1.66	1.71	1.78	2.94	3.18
SIAH3|283514	siah E3 ubiquitin protein ligase family member 3	DOWN	DOWN	-0.973226	0.000230362	0.973226	315.2	1077.37	1.35	1.69	1.43	1.83	2.03	3.34
C8orf80|389643	nuclear GTPase%2C germinal center associated	DOWN	DOWN	-0.972719	3.18377e-06	0.972719	606.1	2020.49	2.59	3.18	1.8	2.04	3.22	4.15
HLA-DRB5|3127	major histocompatibility complex, class II, DR beta 5	DOWN	DOWN	-0.971861	6.13603e-09	0.971861	2198.91	6376.85	9.4	10.03	1.78	2.06	3.18	4.24
CCL18|6362	C-C motif chemokine ligand 18	DOWN	DOWN	-0.971724	5.73258e-05	0.971724	1530.45	4482.06	6.54	7.05	3.22	3.45	10.35	11.91
TPSD1|23430	tryptase delta 1	UP	UP	0.969759	0.000930702	0.969759	491.7	1621.49	2.1	2.55	2.17	2.43	4.69	5.9
CRYBB3|1417	crystallin beta B3	UP	UP	0.96902	4.2577e-07	0.96902	288.09	758.93	1.23	1.19	1.17	1.06	1.37	1.12
NAP1L3|4675	nucleosome assembly protein 1 like 3	DOWN	DOWN	-0.968512	1.12508e-05	0.968512	1222.57	3540.74	5.22	5.57	2.36	2.46	5.59	6.06
YSK4|80122	mitogen-activated protein kinase kinase kinase 19	DOWN	DOWN	-0.968286	0.00201989	0.968286	281.66	1231.69	1.2	1.94	1.73	2.36	2.98	5.58	0	19
TTN|7273	titin	DOWN	DOWN	-0.968235	3.90596e-06	0.968235	1572.93	4371.24	6.72	6.87	1.54	1.72	2.37	2.97
KCNF1|3754	potassium voltage-gated channel modifier subfamily F member 1	UP	UP	0.967673	0.000194115	0.967673	969.71	2439.47	4.14	3.84	3.13	2.59	9.78	6.72
IL5RA|3568	interleukin 5 receptor subunit alpha	DOWN	DOWN	-0.966659	0.000527534	0.966659	216.51	1009.45	0.93	1.59	1.34	1.77	1.81	3.12	31	31
SCEL|8796	sciellin	DOWN	DOWN	-0.96616	0.00131855	0.96616	1134.29	3638.13	4.85	5.72	3.57	3.97	12.75	15.79	30	30
KREMEN2|79412	kringle containing transmembrane protein 2	UP	UP	0.966155	4.52401e-06	0.966155	1255.31	3114.77	5.36	4.9	2.4	2.14	5.78	4.58
MFAP5|8076	microfibril associated protein 5	UP	UP	0.96505	5.65364e-05	0.96505	1531.05	4121.89	6.54	6.48	3.35	2.88	11.24	8.3
GOLGA6L1|283767	golgin A6 family-like 1	DOWN	DOWN	-0.964338	0.00292263	0.964338	175.12	664.38	0.75	1.04	1.35	1.66	1.83	2.77
THRSP|7069	thyroid hormone responsive	DOWN	DOWN	-0.964266	9.95924e-05	0.964266	318.82	900.15	1.36	1.42	1.81	2.03	3.28	4.1
ADH6|130	alcohol dehydrogenase 6 (class V)	UP	UP	0.962241	0.0020024	0.962241	461.13	1606.5	1.97	2.53	2.51	2.68	6.28	7.17
MSLN|10232	mesothelin	DOWN	DOWN	-0.96182	0.00144664	0.96182	1467.43	4850.07	6.27	7.63	4.21	4.26	17.72	18.15
TDGF1|6997	teratocarcinoma-derived growth factor 1	DOWN	DOWN	-0.959174	0.000140405	0.959174	430.05	1653.3	1.84	2.6	1.94	2.28	3.78	5.22
C13orf33|84935	mesenteric estrogen dependent adipogenesis	UP	UP	0.958146	1.63151e-07	0.958146	1431.64	3678.29	6.12	5.78	2.23	2.12	4.97	4.48
NUP107|57122	nucleoporin 107	UP	UP	0.957539	1.24934e-32	0.957539	2381.25	6162.91	10.18	9.69	1.11	0.65	1.22	0.42	196	196
PEBP4|157310	phosphatidylethanolamine binding protein 4	DOWN	DOWN	-0.956768	7.04217e-10	0.956768	452.24	1698.79	1.93	2.67	2.26	2.87	5.1	8.26
SLC26A3|1811	solute carrier family 26 member 3	DOWN	DOWN	-0.956703	0.0259263	0.956703	199.8	517.52	0.85	0.81	1.89	2.13	3.58	4.54
RGS7BP|401190	regulator of G protein signaling 7 binding protein	DOWN	DOWN	-0.955985	0.000191893	0.955985	676.49	2252.92	2.89	3.54	2.3	2.5	5.28	6.25
CXCL13|10563	C-X-C motif chemokine ligand 13	DOWN	DOWN	-0.95405	9.24639e-05	0.95405	1403.45	4264.47	6	6.71	3	3.2	9.02	10.25
KLHL4|56062	kelch like family member 4	UP	UP	0.95317	6.3229e-05	0.95317	983.92	2400.88	4.2	3.77	2.97	2.44	8.81	5.95
ZDHHC19|131540	zinc finger DHHC-type containing 19	UP	UP	0.952059	7.41912e-06	0.952059	353.23	775.58	1.51	1.22	1.62	1.24	2.62	1.55
ORAOV1|220064	LTO1 maturation factor of ABCE1	UP	UP	0.949285	5.39325e-24	0.949285	1985.42	5096.13	8.48	8.01	1.17	0.72	1.37	0.52	168	177
SLC8A3|6547	solute carrier family 8 member A3	DOWN	DOWN	-0.947022	0.00073379	0.947022	539.29	1844.47	2.3	2.9	2.46	2.7	6.07	7.29
PGM5|5239	phosphoglucomutase 5	DOWN	DOWN	-0.946334	9.81441e-06	0.946334	1432.1	4226.3	6.12	6.65	2.31	2.28	5.33	5.18
PDE8B|8622	phosphodiesterase 8B	DOWN	DOWN	-0.94396	6.79272e-06	0.94396	1202.43	3430.2	5.14	5.39	1.99	2.29	3.94	5.25
APOD|347	apolipoprotein D	DOWN	DOWN	-0.943102	2.94502e-05	0.943102	1910.42	5478.56	8.16	8.61	2.78	2.78	7.71	7.7
FAM78B|149297	family with sequence similarity 78 member B	UP	UP	0.941587	0.0497777	0.941587	1030.95	2591.35	4.41	4.07	1.73	1.37	2.99	1.89
MEOX2|4223	mesenchyme homeobox 2	UP	UP	0.939165	5.64556e-05	0.939165	1032.57	2481.31	4.41	3.9	2.88	2.51	8.28	6.28
VGF|7425	VGF nerve growth factor inducible	UP	UP	0.938683	7.72918e-08	0.938683	1031.65	2324.3	4.41	3.65	3.06	2.57	9.37	6.59
METTL7B|196410	methyltransferase like 7B	UP	UP	0.938608	1.17469e-05	0.938608	1580.96	3988.71	6.76	6.27	2.81	2.58	7.9	6.65
CTCFL|140690	CCCTC-binding factor like	UP	UP	0.938586	5.38887e-05	0.938586	913.12	2452.91	3.9	3.86	2.1	1.78	4.42	3.15
ACER2|340485	alkaline ceramidase 2	UP	UP	0.937527	1.70676e-08	0.937527	1450.09	3749.33	6.2	5.9	2.04	1.55	4.16	2.41
SLC12A3|6559	solute carrier family 12 member 3	UP	UP	0.934501	0.0181012	0.934501	344.23	1143.12	1.47	1.8	1.52	1.51	2.33	2.3
ATP6V0D2|245972	ATPase H+ transporting V0 subunit d2	DOWN	DOWN	-0.934484	1.41568e-05	0.934484	739.36	2221.24	3.16	3.49	1.88	2.15	3.53	4.61
FCRL3|115352	Fc receptor like 3	DOWN	DOWN	-0.932599	3.58943e-05	0.932599	603.43	2010.13	2.58	3.16	1.83	2.16	3.36	4.68
HKDC1|80201	hexokinase domain containing 1	DOWN	DOWN	-0.932293	3.59353e-05	0.932293	1173.33	3947.48	5.01	6.21	3.21	3.09	10.3	9.53	16	16
MSTN|2660	myostatin	DOWN	DOWN	-0.930978	0.000123164	0.930978	524.67	1481.78	2.24	2.33	2.38	2.54	5.67	6.44
SLC9A4|389015	solute carrier family 9 member A4	UP	UP	0.929687	0.0053211	0.929687	559.11	1574.44	2.39	2.48	2.58	2.49	6.64	6.22
RBP7|116362	retinol binding protein 7	UP	UP	0.927873	5.53377e-08	0.927873	1367.37	3496.77	5.84	5.5	1.89	1.7	3.57	2.9
PTN|5764	pleiotrophin	UP	UP	0.926882	5.73258e-05	0.926882	1952.63	4982.5	8.34	7.83	3.27	2.65	10.67	7.04	53	53
MYBPH|4608	myosin binding protein H	DOWN	DOWN	-0.92601	4.80422e-05	0.92601	445.78	1348.04	1.91	2.12	2.61	2.75	6.83	7.58
ZBTB16|7704	zinc finger and BTB domain containing 16	DOWN	DOWN	-0.925577	0.0002169	0.925577	815.7	2518.4	3.49	3.96	2.54	2.94	6.48	8.64
MORN5|254956	MORN repeat containing 5	DOWN	DOWN	-0.925243	0.00371621	0.925243	340.44	1557.71	1.45	2.45	1.9	2.58	3.61	6.65	12	19
ISL1|3670	ISL LIM homeobox 1	DOWN	DOWN	-0.925218	0.00460456	0.925218	503.71	1442.04	2.15	2.27	2.43	2.57	5.9	6.62
HOXA4|3201	homeobox A4	UP	UP	0.924445	5.38746e-07	0.924445	1313.93	2855.18	5.62	4.49	1.95	2.21	3.82	4.9	186	195
P2RY12|64805	purinergic receptor P2Y12	DOWN	DOWN	-0.921154	0.000763582	0.921154	718.52	2227.67	3.07	3.5	2.62	2.9	6.87	8.39
ACSL6|23305	acyl-CoA synthetase long chain family member 6	DOWN	DOWN	-0.919928	0.000431569	0.919928	752.67	2264.19	3.22	3.56	2.47	2.71	6.13	7.34
WNT10B|7480	Wnt family member 10B	UP	UP	0.919872	4.54587e-05	0.919872	928.9	2330.2	3.97	3.66	1.99	1.8	3.98	3.22
RTN1|6252	reticulon 1	DOWN	DOWN	-0.917858	7.04226e-05	0.917858	1496.14	4382.89	6.39	6.89	2.49	2.67	6.21	7.13
YEATS4|8089	YEATS domain containing 4	UP	UP	0.917541	7.67786e-21	0.917541	2084.93	5366.86	8.91	8.44	1.19	0.75	1.41	0.56	105	185
VOPP1|81552	VOPP1, WBP1/VOPP1 family member	UP	UP	0.916871	6.29948e-11	0.916871	2442.55	6573.71	10.44	10.34	1.12	0.7	1.26	0.49
CCT2|10576	chaperonin containing TCP1 subunit 2	UP	UP	0.915706	1.4512e-25	0.915706	2839.54	7432.05	12.13	11.69	1.11	0.57	1.23	0.33	184	185
P2RY10|27334	P2Y receptor family member 10	DOWN	DOWN	-0.914797	2.05177e-06	0.914797	811.63	2626.18	3.47	4.13	1.86	2.16	3.45	4.66	11	78
NTNG2|84628	netrin G2	DOWN	DOWN	-0.913709	2.48913e-06	0.913709	1086.78	3138.48	4.64	4.93	1.74	1.96	3.04	3.86
CNGA4|1262	cyclic nucleotide gated channel alpha 4	DOWN	DOWN	-0.913661	3.3934e-06	0.913661	395.13	1425.23	1.69	2.24	1.18	1.86	1.4	3.46
SNTG2|54221	syntrophin gamma 2	DOWN	DOWN	-0.912117	0.0044673	0.912117	142.58	550.34	0.61	0.87	1.03	1.34	1.06	1.8
MYLK|4638	myosin light chain kinase	DOWN	DOWN	-0.912093	1.02668e-07	0.912093	2420.75	6710.46	10.35	10.55	1.44	1.64	2.07	2.69
TSFM|10102	Ts translation elongation factor, mitochondrial	UP	UP	0.910751	3.09193e-33	0.910751	2280.86	5961.73	9.75	9.37	1.04	0.47	1.08	0.22	164	200
SLC6A14|11254	solute carrier family 6 member 14	DOWN	DOWN	-0.910591	0.00234693	0.910591	1241.94	4051.74	5.31	6.37	3.87	3.99	15.01	15.9
SUSD5|26032	sushi domain containing 5	DOWN	DOWN	-0.910306	0.000163445	0.910306	1224.63	3574.42	5.23	5.62	1.99	2.32	3.96	5.4
ADAMTS8|11095	ADAM metallopeptidase with thrombospondin type 1 motif 8	DOWN	DOWN	-0.909446	4.41975e-05	0.909446	946.27	3194.99	4.04	5.02	2.23	2.51	4.97	6.32
SH3GL2|6456	SH3 domain containing GRB2 like 2, endophilin A1	DOWN	DOWN	-0.908649	0.00423746	0.908649	689.82	1997	2.95	3.14	2.91	3.36	8.45	11.28
MAP1A|4130	microtubule associated protein 1A	DOWN	DOWN	-0.907469	3.62673e-06	0.907469	2021.97	5661.57	8.64	8.9	1.91	2.2	3.66	4.84
MYOT|9499	myotilin	DOWN	DOWN	-0.907091	4.72104e-05	0.907091	477.54	1493.31	2.04	2.35	2.11	2.47	4.45	6.12
A2ML1|144568	alpha-2-macroglobulin like 1	DOWN	DOWN	-0.905631	0.00590292	0.905631	1319.38	3721.9	5.64	5.85	4.26	4.38	18.17	19.15
PYY|5697	peptide YY	UP	UP	0.905235	0.0051147	0.905235	183.77	865.94	0.79	1.36	1.74	2.34	3.02	5.46
ZNF804A|91752	zinc finger protein 804A	DOWN	DOWN	-0.903679	2.65494e-05	0.903679	681.77	2148.97	2.91	3.38	1.8	2.14	3.23	4.6
VIPR2|7434	vasoactive intestinal peptide receptor 2	DOWN	DOWN	-0.90224	0.00124058	0.90224	835.18	2787.4	3.57	4.38	2.73	2.94	7.43	8.65
TCEAL2|140597	transcription elongation factor A like 2	DOWN	DOWN	-0.90191	0.00234988	0.90191	910.81	2740.66	3.89	4.31	3.13	3.33	9.8	11.07
ACTC1|70	actin, alpha, cardiac muscle 1	DOWN	DOWN	-0.901559	3.20489e-06	0.901559	908.16	2321.66	3.88	3.65	2.97	3.38	8.82	11.46
SCG3|29106	secretogranin III	DOWN	DOWN	-0.900552	0.000596031	0.900552	765.39	1991.36	3.27	3.13	3.84	4.13	14.75	17.08
DSCAML1|57453	DS cell adhesion molecule like 1	DOWN	DOWN	-0.898672	0.00212314	0.898672	720.02	2169.9	3.08	3.41	2.79	3.14	7.81	9.85
CHRNG|1146	cholinergic receptor nicotinic gamma subunit	DOWN	DOWN	-0.898402	0.00506125	0.898402	178.67	616.08	0.76	0.97	1.21	1.55	1.46	2.39
AVIL|10677	advillin	UP	UP	0.894445	2.43437e-17	0.894445	1279.13	3193.95	5.47	5.02	1.76	1.29	3.11	1.66	174	174
DNAH6|1768	dynein axonemal heavy chain 6	DOWN	DOWN	-0.892886	9.01758e-06	0.892886	798.14	2629.32	3.41	4.13	1.96	2.26	3.84	5.1
C1QTNF9|338872	C1q and TNF related 9	UP	UP	0.892769	2.77761e-05	0.892769	408.03	1206.28	1.74	1.9	1.61	1.51	2.6	2.27
WDFY4|57705	WDFY family member 4	DOWN	DOWN	-0.892681	2.05603e-09	0.892681	1535.09	4576.31	6.56	7.2	1.59	1.78	2.54	3.18
SLC3A1|6519	solute carrier family 3 member 1	DOWN	DOWN	-0.891661	0.000219697	0.891661	745.24	2268.98	3.18	3.57	2.24	2.44	5.02	5.97
FABP1|2168	fatty acid binding protein 1	DOWN	DOWN	-0.891303	0.0183944	0.891303	301.85	723.84	1.29	1.14	2.84	2.69	8.07	7.24
IGF2|3481	insulin like growth factor 2	UP	UP	0.891256	5.20324e-08	0.891256	2384.98	6294.09	10.19	9.9	2.92	2.61	8.55	6.81
CD19|930	CD19 molecule	DOWN	DOWN	-0.890948	0.0183944	0.890948	648.13	2186.45	2.77	3.44	2.18	2.31	4.74	5.35
KRT83|3889	keratin 83	UP	UP	0.890113	0.00504316	0.890113	375.56	1031.28	1.6	1.62	1.94	1.85	3.78	3.41
XKR4|114786	XK related 4	DOWN	DOWN	-0.889867	0.000163445	0.889867	265.51	1158.13	1.13	1.82	1.87	2.18	3.51	4.73
CPXM1|56265	carboxypeptidase X, M14 family member 1	UP	UP	0.888897	1.79578e-07	0.888897	2016.39	5410.46	8.62	8.51	2.02	1.77	4.07	3.14
CNGA3|1261	cyclic nucleotide gated channel alpha 3	UP	UP	0.888261	0.00629549	0.888261	586.31	1430.39	2.51	2.25	3.09	2.46	9.56	6.07
EBF3|253738	early B cell factor 3	UP	UP	0.887558	3.60796e-05	0.887558	1041.41	2572.93	4.45	4.05	2.33	2.15	5.42	4.62
NLRP2|55655	NLR family pyrin domain containing 2	UP	UP	0.887443	0.000703566	0.887443	1515.73	3853.26	6.48	6.06	3.62	3.32	13.08	11
KLK13|26085	kallikrein related peptidase 13	DOWN	DOWN	-0.887227	0.000709986	0.887227	842.24	2493.27	3.6	3.92	3.32	3.56	11.03	12.68
ZNF492|57615	zinc finger protein 492	UP	UP	0.885092	0.000167794	0.885092	608.53	1508.99	2.6	2.37	2.26	1.81	5.11	3.27
TNIP3|79931	TNFAIP3 interacting protein 3	DOWN	DOWN	-0.884025	0.00010688	0.884025	715.28	2355.89	3.06	3.7	2.11	2.29	4.44	5.26
KCNE1L|23630	potassium voltage-gated channel subfamily E regulatory subunit 5	UP	UP	0.880851	4.69597e-08	0.880851	610.07	1528.51	2.61	2.4	2.12	1.59	4.48	2.52
UPK1B|7348	uroplakin 1B	UP	UP	0.879477	0.0243502	0.879477	1009.74	2726.23	4.32	4.29	4.49	4.29	20.17	18.37
NUP210L|91181	nucleoporin 210 like	DOWN	DOWN	-0.877643	0.0404462	0.877643	203.54	725.84	0.87	1.14	1.19	1.51	1.42	2.29
SPATS1|221409	spermatogenesis associated serine rich 1	UP	UP	0.875568	0.0083518	0.875568	162.49	650.13	0.69	1.02	1.28	1.54	1.64	2.37
LPO|4025	lactoperoxidase	DOWN	DOWN	-0.871923	0.00156274	0.871923	384.87	1062.65	1.64	1.67	1.49	1.78	2.23	3.16
SHD|56961	Src homology 2 domain containing transforming protein D	DOWN	DOWN	-0.86869	0.0146265	0.86869	629.8	1763.85	2.69	2.77	3.14	3.35	9.89	11.23
KRTAP5-9|3846	keratin associated protein 5-9	UP	UP	0.867617	7.26514e-05	0.867617	461.92	1181.71	1.97	1.86	1.69	1.46	2.85	2.14
EMR3|84658	adhesion G protein-coupled receptor E3	DOWN	DOWN	-0.866817	0.000240906	0.866817	341.52	1171.36	1.46	1.84	1.5	1.65	2.26	2.73
CHIT1|1118	chitinase 1	DOWN	DOWN	-0.866452	0.000216422	0.866452	1134.6	3652.76	4.85	5.74	2.95	3.04	8.69	9.22
RBP4|5950	retinol binding protein 4	UP	UP	0.865917	0.00174469	0.865917	995.86	2582.29	4.26	4.06	2.87	2.69	8.23	7.24
KCNH1|3756	potassium voltage-gated channel subfamily H member 1	DOWN	DOWN	-0.864613	0.000115661	0.864613	813.29	2428.26	3.48	3.82	2.08	2.36	4.32	5.59
FAM155A|728215	family with sequence similarity 155 member A	DOWN	DOWN	-0.863897	7.75561e-05	0.863897	1054.14	3205.24	4.5	5.04	2.02	2.36	4.07	5.58
DLG2|1740	discs large MAGUK scaffold protein 2	DOWN	DOWN	-0.863818	0.000244756	0.863818	982.83	3145.26	4.2	4.95	2.61	2.54	6.8	6.44
GPR174|84636	G protein-coupled receptor 174	DOWN	DOWN	-0.862569	2.28129e-05	0.862569	489.63	1661.82	2.09	2.61	1.48	1.8	2.2	3.24	52	52
TNNI3|7137	troponin I3, cardiac type	UP	UP	0.862057	0.00154266	0.862057	824.63	2095.65	3.52	3.3	2.72	2.58	7.38	6.64
DUSP26|78986	dual specificity phosphatase 26	DOWN	DOWN	-0.86198	0.00191056	0.86198	727.33	2217.62	3.11	3.49	2.61	2.93	6.79	8.57
SNAP25|6616	synaptosome associated protein 25	DOWN	DOWN	-0.861925	0.000972968	0.861925	1063.6	2908.19	4.55	4.57	2.91	3.16	8.47	9.99
GAL3ST2|64090	galactose-3-O-sulfotransferase 2	DOWN	DOWN	-0.861685	0.00029716	0.861685	447.46	1381.57	1.91	2.17	1.66	1.89	2.77	3.57
DUSP15|128853	dual specificity phosphatase 15	UP	UP	0.860741	2.73657e-05	0.860741	958.14	2325.65	4.09	3.66	2.46	2.04	6.04	4.17
STAP1|26228	signal transducing adaptor family member 1	DOWN	DOWN	-0.860647	8.45356e-05	0.860647	548.66	1771.52	2.34	2.79	1.62	1.88	2.61	3.53
LRIG1|26018	leucine rich repeats and immunoglobulin like domains 1	DOWN	DOWN	-0.860291	1.53336e-07	0.860291	2403.78	7010.76	10.27	11.02	1.85	1.93	3.41	3.71
SMAD9|4093	SMAD family member 9	DOWN	DOWN	-0.860123	2.76958e-05	0.860123	1058.72	3142.24	4.52	4.94	2.02	2.2	4.07	4.82
KHDRBS2|202559	KH RNA binding domain containing, signal transduction associated 2	DOWN	DOWN	-0.859828	0.0075957	0.859828	274.94	1076.6	1.17	1.69	1.57	1.97	2.47	3.87
ABCG8|64241	ATP binding cassette subfamily G member 8	UP	UP	0.858378	0.00708781	0.858378	220.48	462.17	0.94	0.73	1.74	1.39	3.04	1.94
TSPAN1|10103	tetraspanin 1	DOWN	DOWN	-0.857156	0.000262829	0.857156	1876.23	5881.51	8.02	9.25	3.5	3.43	12.26	11.74
MAPT|4137	microtubule associated protein tau	DOWN	DOWN	-0.853295	0.00107483	0.853295	1445.13	3917.68	6.18	6.16	3.13	3.31	9.77	10.94
C16orf54|283897	chromosome 16 open reading frame 54	DOWN	DOWN	-0.852745	1.95965e-08	0.852745	1144.05	3542.82	4.89	5.57	1.53	1.7	2.35	2.9	44	44
FIBCD1|84929	fibrinogen C domain containing 1	DOWN	DOWN	-0.851589	0.000153224	0.851589	930.64	2616.85	3.98	4.11	2.11	2.25	4.44	5.05
ZP1|22917	zona pellucida glycoprotein 1	UP	UP	0.85154	0.000666031	0.85154	336.97	637.06	1.44	1	1.49	1.2	2.23	1.44
SLIT1|6585	slit guidance ligand 1	DOWN	DOWN	-0.851466	0.00438044	0.851466	943.32	2617.44	4.03	4.12	3.04	3.29	9.22	10.85
C18orf34|374864	coiled-coil domain containing 178	DOWN	DOWN	-0.849918	0.000138241	0.849918	367.28	1318.14	1.57	2.07	1.38	1.59	1.92	2.52
SYBU|55638	syntabulin	DOWN	DOWN	-0.849912	7.25561e-06	0.849912	1661.74	5028.04	7.1	7.91	2.35	2.3	5.52	5.3
CYTL1|54360	cytokine like 1	UP	UP	0.849695	0.0476078	0.849695	983.72	2598.09	4.2	4.09	2.2	1.9	4.85	3.6
CPM|1368	carboxypeptidase M	UP	UP	0.849391	0.00934571	0.849391	2194.83	6116.49	9.38	9.62	1.95	1.72	3.8	2.97
FREM2|341640	FRAS1 related extracellular matrix protein 2	UP	UP	0.848517	0.000797253	0.848517	1389.87	3775.48	5.94	5.94	3.54	3.16	12.56	9.97
PRSS21|10942	serine protease 21	UP	UP	0.847735	0.00460456	0.847735	964.74	2405.29	4.12	3.78	3.53	3.12	12.49	9.74
NOG|9241	noggin	DOWN	DOWN	-0.847253	0.000474767	0.847253	659.05	2217.27	2.82	3.49	2.07	2.48	4.3	6.13
SFTPB|6439	surfactant protein B	DOWN	DOWN	-0.846803	0.0037699	0.846803	681.51	2571.18	2.91	4.04	4.44	5.73	19.69	32.86
SLC47A2|146802	solute carrier family 47 member 2	UP	UP	0.845561	0.00178597	0.845561	790.4	1924.26	3.38	3.03	2.89	2.34	8.33	5.46
ROPN1L|83853	rhophilin associated tail protein 1 like	DOWN	DOWN	-0.844385	0.000592663	0.844385	527.42	1861.81	2.25	2.93	1.85	2.53	3.43	6.38
SLC34A2|10568	solute carrier family 34 member 2	DOWN	DOWN	-0.843498	0.0137004	0.843498	1364.27	4581.21	5.83	7.2	4.59	5.31	21.08	28.17
KSR2|283455	kinase suppressor of ras 2	DOWN	DOWN	-0.842128	0.000107214	0.842128	959.78	3051.23	4.1	4.8	2.23	2.35	4.96	5.5
PTCHD2|57540	dispatched RND transporter family member 3	DOWN	DOWN	-0.841636	0.00986138	0.841636	802.55	2406.53	3.43	3.78	2.86	3.06	8.16	9.36
GRM6|2916	glutamate metabotropic receptor 6	UP	UP	0.840389	9.07442e-05	0.840389	474.53	1116.55	2.03	1.76	1.8	1.44	3.25	2.06
TPRG1|285386	tumor protein p63 regulated 1	DOWN	DOWN	-0.840153	4.72104e-05	0.840153	1156.77	3344.72	4.94	5.26	1.76	2.16	3.09	4.69
CD209|30835	CD209 molecule	UP	UP	0.839928	5.12046e-06	0.839928	1419.16	3922.16	6.06	6.17	2.23	2	4.96	4
FRMPD1|22844	FERM and PDZ domain containing 1	DOWN	DOWN	-0.839657	0.00187894	0.839657	597.42	1733.16	2.55	2.73	2.06	2.45	4.25	5.98
RGS9|8787	regulator of G protein signaling 9	DOWN	DOWN	-0.838737	5.68419e-05	0.838737	914.97	2784.12	3.91	4.38	1.92	2.09	3.7	4.37
SMOC1|64093	SPARC related modular calcium binding 1	DOWN	DOWN	-0.838673	0.00306537	0.838673	1313.28	3969.53	5.61	6.24	3.33	3.66	11.12	13.39
NR1I2|8856	nuclear receptor subfamily 1 group I member 2	DOWN	DOWN	-0.838199	0.000503675	0.838199	579.96	1508.82	2.48	2.37	2.27	2.22	5.16	4.94
INMT|11185	indolethylamine N-methyltransferase	DOWN	DOWN	-0.837811	9.01758e-06	0.837811	1308.5	3844.01	5.59	6.04	1.84	2.08	3.4	4.31
CYP27B1|1594	cytochrome P450 family 27 subfamily B member 1	UP	UP	0.83651	1.07356e-07	0.83651	1517.74	3585.41	6.49	5.64	1.77	1.76	3.12	3.09	159	159
GRB14|2888	growth factor receptor bound protein 14	UP	UP	0.836059	0.000149568	0.836059	1113.46	2878.84	4.76	4.53	2.3	2.41	5.27	5.82
CCL24|6369	C-C motif chemokine ligand 24	DOWN	DOWN	-0.834944	0.0039088	0.834944	330.56	1105.48	1.41	1.74	1.83	1.95	3.36	3.81
GALR2|8811	galanin receptor 2	UP	UP	0.833433	0.000161614	0.833433	440.68	1122.07	1.88	1.76	1.65	1.43	2.72	2.04
CHST13|166012	carbohydrate sulfotransferase 13	UP	UP	0.832647	4.33237e-06	0.832647	680.09	1766.36	2.91	2.78	1.64	1.49	2.69	2.21
GOLGA6L6|727832	golgin A6 family-like 6	DOWN	DOWN	-0.832514	0.0116221	0.832514	247.72	852.82	1.06	1.34	1.52	1.81	2.31	3.29
CD24|100133941	CD24 molecule	UP	UP	0.831566	5.72267e-07	0.831566	2988.86	8160.21	12.77	12.83	2.61	2.18	6.79	4.77
JPH4|84502	junctophilin 4	DOWN	DOWN	-0.828816	0.00187894	0.828816	981.4	2885.35	4.19	4.54	2.72	2.8	7.43	7.83
FCRLB|127943	Fc receptor like B	UP	UP	0.827814	0.00578568	0.827814	1114.05	2752.9	4.76	4.33	1.83	1.51	3.36	2.29
RGS6|9628	regulator of G protein signaling 6	UP	UP	0.827426	0.000934844	0.827426	910.75	2352.95	3.89	3.7	2.67	2.45	7.13	6
SRPX|8406	sushi repeat containing protein X-linked	UP	UP	0.823294	2.83351e-05	0.823294	1770.36	4481.16	7.57	7.05	2.42	2.21	5.85	4.88
DUOX2|50506	dual oxidase 2	DOWN	DOWN	-0.822749	0.00232811	0.822749	1490.66	4119.46	6.37	6.48	3.47	3.38	12.02	11.41
RXFP1|59350	relaxin family peptide receptor 1	DOWN	DOWN	-0.822416	0.000502128	0.822416	464.93	1742.49	1.99	2.74	1.69	2.15	2.87	4.61
STK32A|202374	serine/threonine kinase 32A	DOWN	DOWN	-0.822353	0.00476349	0.822353	603.98	1920.94	2.58	3.02	2.54	2.99	6.48	8.92
NALCN|259232	sodium leak channel, non-selective	DOWN	DOWN	-0.822178	0.00180844	0.822178	935.04	2782.65	4	4.38	2.77	2.93	7.66	8.6
OTC|5009	ornithine carbamoyltransferase	DOWN	DOWN	-0.821956	0.025929	0.821956	184.69	573.83	0.79	0.9	1.62	1.85	2.63	3.43
ST6GALNAC1|55808	ST6 N-acetylgalactosaminide alpha-2,6-sialyltransferase 1	DOWN	DOWN	-0.821828	0.000264327	0.821828	1469.74	4931.31	6.28	7.75	3.22	3.01	10.35	9.06	64	88
FGL2|10875	fibrinogen like 2	DOWN	DOWN	-0.821149	6.43896e-08	0.821149	1906.84	5481.12	8.15	8.62	1.53	1.71	2.35	2.93
CD3G|917	CD3g molecule	DOWN	DOWN	-0.821027	1.57112e-05	0.821027	862.45	2704.85	3.69	4.25	1.85	2.21	3.41	4.86	74	78
HOXA7|3204	homeobox A7	UP	UP	0.819709	0.000125734	0.819709	1500.1	3423.41	6.41	5.38	2.49	2.64	6.21	6.95	51	195
PTPRR|5801	protein tyrosine phosphatase, receptor type R	UP	UP	0.819566	0.00047326	0.819566	1086.93	2740.19	4.64	4.31	2.44	2.2	5.96	4.83
FAIM2|23017	Fas apoptotic inhibitory molecule 2	DOWN	DOWN	-0.819196	0.00368418	0.819196	1244.22	3787.2	5.32	5.95	3.2	3.38	10.22	11.45
DNASE2B|58511	deoxyribonuclease 2 beta	DOWN	DOWN	-0.818599	0.00425708	0.818599	352.45	1020.6	1.51	1.6	1.47	1.67	2.16	2.77
CRYBB2|1415	crystallin beta B2	UP	UP	0.817824	3.48967e-06	0.817824	448.32	1068.74	1.92	1.68	1.32	1.21	1.75	1.47
KCNN3|3782	potassium calcium-activated channel subfamily N member 3	DOWN	DOWN	-0.817788	1.62906e-05	0.817788	1192.89	3584.42	5.1	5.64	1.79	1.99	3.19	3.97
MUC6|4588	mucin 6, oligomeric mucus/gel-forming	DOWN	DOWN	-0.816059	0.0180749	0.816059	858.28	2794.05	3.67	4.39	3.92	4.04	15.39	16.31
ZNF713|349075	zinc finger protein 713	UP	UP	0.814212	1.46825e-11	0.814212	1350.2	3579.78	5.77	5.63	1.38	1.09	1.92	1.19
PAX5|5079	paired box 5	DOWN	DOWN	-0.812598	0.00208775	0.812598	519.73	1705.03	2.22	2.68	2	2.31	4	5.32
FRMPD2|143162	FERM and PDZ domain containing 2	DOWN	DOWN	-0.811833	0.00521703	0.811833	273.04	1199.19	1.17	1.89	1.43	1.95	2.03	3.8	3	19
GABBR1|2550	gamma-aminobutyric acid type B receptor subunit 1	DOWN	DOWN	-0.811529	8.32224e-05	0.811529	1959.37	5261.11	8.37	8.27	1.86	2.23	3.46	4.99
TRIM31|11074	tripartite motif containing 31	DOWN	DOWN	-0.81048	0.0106208	0.81048	928.65	2823	3.97	4.44	3.61	3.59	13.05	12.86
DBC1|1620	BMP/retinoic acid inducible neural specific 1	DOWN	DOWN	-0.80993	0.00584058	0.80993	740.89	2267.74	3.17	3.57	2.88	3.31	8.28	10.95
SLC15A2|6565	solute carrier family 15 member 2	DOWN	DOWN	-0.809348	4.20343e-06	0.809348	1716.45	4994.31	7.34	7.85	1.82	2.13	3.32	4.53
ZIC1|7545	Zic family member 1	UP	UP	0.808316	0.0259263	0.808316	884.69	2262.68	3.78	3.56	3.85	3.61	14.81	13.06
DOC2B|8447	double C2 domain beta	DOWN	DOWN	-0.806488	7.58076e-05	0.806488	802.87	2638.95	3.43	4.15	2.04	2.09	4.18	4.35
CYP2W1|54905	cytochrome P450 family 2 subfamily W member 1	UP	UP	0.806214	0.014636	0.806214	684.43	1667.65	2.92	2.62	2.98	2.86	8.87	8.19
GNAO1|2775	G protein subunit alpha o1	DOWN	DOWN	-0.805872	0.000711257	0.805872	1499.63	4327.1	6.41	6.8	2.65	2.71	7.02	7.33
SLC6A1|6529	solute carrier family 6 member 1	DOWN	DOWN	-0.805849	0.00352413	0.805849	1086.57	3011.21	4.64	4.73	2.79	2.97	7.78	8.82
TM4SF4|7104	transmembrane 4 L six family member 4	DOWN	DOWN	-0.805499	0.0378008	0.805499	464.44	1405.32	1.98	2.21	3.12	3.02	9.76	9.15
CYP2A6|1548	cytochrome P450 family 2 subfamily A member 6	DOWN	DOWN	-0.805412	2.28753e-06	0.805412	204.13	700.36	0.87	1.1	1.6	1.73	2.55	3.01
CCNE1|898	cyclin E1	UP	UP	0.805105	6.50807e-09	0.805105	1857.39	4728.85	7.94	7.44	1.52	1.43	2.3	2.06
DNMT3B|1789	DNA methyltransferase 3 beta	UP	UP	0.805016	6.59586e-10	0.805016	1739.88	4305.03	7.44	6.77	1.47	1.44	2.15	2.06
TXNDC3|51314	NME/NM23 family member 8	DOWN	DOWN	-0.804682	6.9069e-05	0.804682	271.06	990.8	1.16	1.56	0.97	1.23	0.95	1.52	10	10
DCN|1634	decorin	UP	UP	0.803549	3.00873e-06	0.803549	2744.26	7371.16	11.73	11.59	2.01	1.87	4.05	3.5
SLC8A2|6543	solute carrier family 8 member A2	DOWN	DOWN	-0.803028	1.88823e-07	0.803028	825.72	2232.79	3.53	3.51	2.3	2.67	5.3	7.14
POU2AF1|5450	POU class 2 associating factor 1	DOWN	DOWN	-0.802602	0.000227909	0.802602	1333.71	4072.47	5.7	6.4	2.59	2.65	6.72	7.01
DNAH7|56171	dynein axonemal heavy chain 7	DOWN	DOWN	-0.802135	0.000112094	0.802135	849.16	2788.5	3.63	4.38	1.96	2.2	3.85	4.82
C2orf39|92749	dynein regulatory complex subunit 1	DOWN	DOWN	-0.801932	0.00969617	0.801932	509.16	1689.39	2.18	2.66	2.05	2.63	4.19	6.9	0	19
IL7R|3575	interleukin 7 receptor	DOWN	DOWN	-0.801617	4.35188e-05	0.801617	1227.76	3642.35	5.25	5.73	2.19	2.51	4.79	6.31
PIGR|5284	polymeric immunoglobulin receptor	DOWN	DOWN	-0.801266	0.0129038	0.801266	1483.78	5422.2	6.34	8.53	4.48	4.99	20.05	24.91	50	88
GPR141|353345	G protein-coupled receptor 141	DOWN	DOWN	-0.800525	5.36279e-06	0.800525	530.76	1743.92	2.27	2.74	1.34	1.57	1.8	2.48
SPARCL1|8404	SPARC like 1	DOWN	DOWN	-0.800212	4.19507e-05	0.800212	2696.98	7457.07	11.53	11.72	1.93	2.13	3.73	4.56
TMPRSS6|164656	transmembrane serine protease 6	DOWN	DOWN	-0.799198	3.82012e-06	0.799198	654.86	1814.05	2.8	2.85	1.8	2.34	3.25	5.46
LTF|4057	lactotransferrin	DOWN	DOWN	-0.797325	0.00974263	0.797325	1571.97	4988.29	6.72	7.84	3.7	4.09	13.69	16.69
GPR171|29909	G protein-coupled receptor 171	DOWN	DOWN	-0.796793	3.28983e-05	0.796793	846.52	2704.75	3.62	4.25	1.72	1.96	2.94	3.83	39	39
RLN1|6013	relaxin 1	UP	UP	0.796535	3.08741e-05	0.796535	274.15	622.14	1.17	0.98	1.12	0.88	1.26	0.77
AMBP|259	alpha-1-microglobulin/bikunin precursor	DOWN	DOWN	-0.795673	0.0135763	0.795673	450.61	1510.34	1.93	2.37	2.18	2.44	4.77	5.97
IGDCC4|57722	immunoglobulin superfamily DCC subclass member 4	UP	UP	0.795528	9.8074e-06	0.795528	1512.42	3830.48	6.46	6.02	2.21	1.77	4.87	3.12	83	83
BEND4|389206	BEN domain containing 4	DOWN	DOWN	-0.794736	0.00711485	0.794736	449.07	1493.33	1.92	2.35	1.66	1.87	2.76	3.51
CD40LG|959	CD40 ligand	DOWN	DOWN	-0.794348	4.80422e-05	0.794348	659.49	2192.11	2.82	3.45	1.74	1.94	3.02	3.76	4	11
C16orf89|146556	chromosome 16 open reading frame 89	DOWN	DOWN	-0.792339	0.000135846	0.792339	1009.32	3312.94	4.31	5.21	3.33	3.74	11.09	13.99
MMRN1|22915	multimerin 1	DOWN	DOWN	-0.789866	5.08263e-06	0.789866	1226.24	3852.09	5.24	6.06	2.03	2	4.11	4
P2RX7|5027	purinergic receptor P2X 7	DOWN	DOWN	-0.788141	5.64748e-05	0.788141	1264.07	3722.13	5.4	5.85	2.09	2.26	4.37	5.1
DAAM2|23500	dishevelled associated activator of morphogenesis 2	DOWN	DOWN	-0.787909	0.000308335	0.787909	1914.33	5436.42	8.18	8.55	2.08	2.34	4.33	5.47
SPSB4|92369	splA/ryanodine receptor domain and SOCS box containing 4	UP	UP	0.787409	0.00143244	0.787409	881.55	2111.69	3.77	3.32	2.82	2.36	7.93	5.59
CD226|10666	CD226 molecule	DOWN	DOWN	-0.786906	3.81622e-08	0.786906	851.1	2635.7	3.64	4.14	1.32	1.52	1.73	2.31
PLN|5350	phospholamban	DOWN	DOWN	-0.786842	0.00142657	0.786842	1183.1	3483.6	5.06	5.48	2.29	2.4	5.23	5.74
MSX1|4487	msh homeobox 1	DOWN	DOWN	-0.786315	0.000198821	0.786315	1507.87	4446.81	6.44	6.99	2.2	3.16	4.82	10.01
GDPD2|54857	glycerophosphodiester phosphodiesterase domain containing 2	UP	UP	0.785957	0.00699723	0.785957	929.89	2113.63	3.97	3.32	3.33	3.01	11.11	9.09
CBLN1|869	cerebellin 1 precursor	DOWN	DOWN	-0.785621	3.33567e-06	0.785621	525.01	1851.12	2.24	2.91	2.08	2.44	4.34	5.96
CYP21A2|1589	cytochrome P450 family 21 subfamily A member 2	UP	UP	0.784733	0.000177478	0.784733	984.06	2634.82	4.21	4.14	2.15	1.87	4.62	3.48
SELP|6403	selectin P	DOWN	DOWN	-0.784512	0.000284442	0.784512	1042.33	3370.34	4.45	5.3	2.52	2.57	6.37	6.58
PSRC1|84722	proline and serine rich coiled-coil 1	UP	UP	0.784117	1.27609e-11	0.784117	1955.28	4989.78	8.36	7.85	1.38	1.09	1.9	1.19	16	18
LRP4|4038	LDL receptor related protein 4	DOWN	DOWN	-0.78408	0.000222819	0.78408	1919.04	5293	8.2	8.32	2.01	2.41	4.06	5.8
SOX11|6664	SRY-box 11	UP	UP	0.783903	0.00532249	0.783903	1216.73	2806.17	5.2	4.41	3.21	3.06	10.28	9.34
HIST1H3F|8968	histone cluster 1 H3 family member f	UP	UP	0.782948	0.000317017	0.782948	236.04	528.91	1.01	0.83	1.33	1.19	1.77	1.43
XRCC6BP1|91419	ATP23 metallopeptidase and ATP synthase assembly factor homolog	UP	UP	0.782927	4.92329e-18	0.782927	1663.82	4317.84	7.11	6.79	1.16	0.81	1.34	0.65
CD79A|973	CD79a molecule	DOWN	DOWN	-0.782886	0.00101145	0.782886	1273.8	3972.76	5.44	6.25	2.68	2.83	7.2	8.01
PARP15|165631	poly(ADP-ribose) polymerase family member 15	DOWN	DOWN	-0.782778	3.64534e-06	0.782778	785.49	2358.4	3.36	3.71	1.48	1.81	2.2	3.28
XKRX|402415	XK related X-linked	DOWN	DOWN	-0.782679	0.000244498	0.782679	969.96	3026.15	4.15	4.76	2	2.21	4.01	4.88	16	16
C11orf16|56673	chromosome 11 open reading frame 16	DOWN	DOWN	-0.782602	0.00843954	0.782602	260.97	1194.61	1.12	1.88	1.5	2.16	2.26	4.65	37	111
HPCAL4|51440	hippocalcin like 4	DOWN	DOWN	-0.782489	0.000156059	0.782489	789.58	2149.04	3.37	3.38	2.79	3.06	7.79	9.35
AMPD1|270	adenosine monophosphate deaminase 1	DOWN	DOWN	-0.780944	0.0167107	0.780944	320.68	1158.44	1.37	1.82	1.83	2.03	3.33	4.13
C3orf57|165679	serine palmitoyltransferase small subunit B	UP	UP	0.77894	0.00234969	0.77894	1326.76	3494.73	5.67	5.49	3.11	2.74	9.68	7.49
MEST|4232	mesoderm specific transcript	UP	UP	0.77888	1.14113e-08	0.77888	2430.39	6384.3	10.39	10.04	1.76	1.53	3.11	2.34
LILRA1|11024	leukocyte immunoglobulin like receptor A1	DOWN	DOWN	-0.778619	1.08532e-05	0.778619	549.54	1854.98	2.35	2.92	1.5	1.58	2.26	2.5
CD5|921	CD5 molecule	DOWN	DOWN	-0.777684	1.22287e-05	0.777684	1272.07	3920.63	5.44	6.16	1.89	2.14	3.57	4.58	123	123
GPR18|2841	G protein-coupled receptor 18	DOWN	DOWN	-0.777531	7.02889e-06	0.777531	621.62	2065.6	2.66	3.25	1.36	1.6	1.84	2.54	192	192
ADRA1A|148	adrenoceptor alpha 1A	DOWN	DOWN	-0.77719	6.4158e-06	0.77719	304.89	946.97	1.3	1.49	1.55	2.1	2.4	4.43
GABRB3|2562	gamma-aminobutyric acid type A receptor beta3 subunit	DOWN	DOWN	-0.776183	0.00405246	0.776183	1074.99	3115.21	4.59	4.9	3.04	3.22	9.25	10.35
TLX2|3196	T cell leukemia homeobox 2	UP	UP	0.775927	0.00373246	0.775927	364.17	799.25	1.56	1.26	1.74	1.53	3.03	2.34
C9orf117|286207	cilia and flagella associated protein 157	DOWN	DOWN	-0.775461	2.48913e-06	0.775461	712.17	2173	3.04	3.42	1.06	1.63	1.12	2.67
FBXO27|126433	F-box protein 27	UP	UP	0.77512	3.60178e-06	0.77512	1714.87	4274.51	7.33	6.72	2.25	1.98	5.04	3.93
DTX3|196403	deltex E3 ubiquitin ligase 3	UP	UP	0.774742	4.30942e-08	0.774742	2144.23	5700.48	9.16	8.96	1.65	1.46	2.73	2.14
CHD5|26038	chromodomain helicase DNA binding protein 5	DOWN	DOWN	-0.774557	0.000275685	0.774557	632.34	1595.95	2.7	2.51	2.32	2.62	5.36	6.88
FOLR1|2348	folate receptor 1	DOWN	DOWN	-0.774228	0.0138574	0.774228	1135.32	3746.94	4.85	5.89	3.63	3.94	13.16	15.49
C9orf173|441476	sperm-tail PG-rich repeat containing 3	UP	UP	0.773151	0.00211003	0.773151	307.45	765.94	1.31	1.2	1.56	1.24	2.43	1.54
DMRT3|58524	doublesex and mab-3 related transcription factor 3	UP	UP	0.773015	0.00628247	0.773015	622.79	1411.42	2.66	2.22	2.21	2.09	4.9	4.35
FCRL5|83416	Fc receptor like 5	DOWN	DOWN	-0.771103	0.00448135	0.771103	885.7	2848.78	3.79	4.48	2.8	3.01	7.85	9.08
AKAP6|9472	A-kinase anchoring protein 6	DOWN	DOWN	-0.770995	0.000332278	0.770995	1498.12	4426.72	6.4	6.96	2.21	2.3	4.87	5.27
KCNN2|3781	potassium calcium-activated channel subfamily N member 2	DOWN	DOWN	-0.77068	0.000618696	0.77068	910.59	2759.16	3.89	4.34	2.08	2.4	4.32	5.77
CNTN1|1272	contactin 1	DOWN	DOWN	-0.770446	0.00499149	0.770446	1306.72	4069.27	5.58	6.4	3.45	3.36	11.92	11.26
DOK6|220164	docking protein 6	DOWN	DOWN	-0.770351	0.000192573	0.770351	1081.06	3142.16	4.62	4.94	1.95	2.15	3.81	4.61
MYO1A|4640	myosin IA	DOWN	DOWN	-0.767902	0.00711608	0.767902	572.2	1686.28	2.45	2.65	2.98	2.87	8.88	8.24
FBXO17|115290	F-box protein 17	UP	UP	0.766671	2.19558e-06	0.766671	1741.8	4188.14	7.44	6.59	1.91	1.74	3.64	3.02	200	200
SLC9A3|6550	solute carrier family 9 member A3	UP	UP	0.765159	0.00385333	0.765159	848.08	2085.59	3.62	3.28	2.93	2.51	8.58	6.29
SLC18A1|6570	solute carrier family 18 member A1	UP	UP	0.764592	0.019502	0.764592	227.78	558.17	0.97	0.88	1.64	1.28	2.68	1.64
ZG16B|124220	zymogen granule protein 16B	UP	UP	0.762479	0.0104074	0.762479	1141.24	3212.59	4.88	5.05	3.37	3.25	11.39	10.58
ACY3|91703	aminoacylase 3	DOWN	DOWN	-0.761372	0.000282754	0.761372	1004.39	3331.53	4.29	5.24	2.4	2.31	5.76	5.34
UBASH3A|53347	ubiquitin associated and SH3 domain containing A	DOWN	DOWN	-0.760638	7.24048e-05	0.760638	788.62	2584.19	3.37	4.06	1.75	2.02	3.05	4.09	85	85
FGF8|2253	fibroblast growth factor 8	DOWN	DOWN	-0.760222	0.0122315	0.760222	175.76	584.39	0.75	0.92	0.94	1.42	0.89	2.01
VASH2|79805	vasohibin 2	UP	UP	0.759826	2.5588e-06	0.759826	1427.18	3635.24	6.1	5.72	1.81	1.58	3.28	2.49
LRRN4CL|221091	LRRN4 C-terminal like	UP	UP	0.759749	0.00292584	0.759749	1207.07	3255.54	5.16	5.12	2.16	1.86	4.68	3.46
PPARGC1A|10891	PPARG coactivator 1 alpha	UP	UP	0.759455	0.00100221	0.759455	1308.33	3406.02	5.59	5.36	2.84	2.51	8.07	6.29
SORBS1|10580	sorbin and SH3 domain containing 1	DOWN	DOWN	-0.758868	6.06777e-05	0.758868	2044.86	5786.15	8.74	9.1	1.96	2.11	3.83	4.45
ATP6V1G2|534	ATPase H+ transporting V1 subunit G2	DOWN	DOWN	-0.758728	0.00512186	0.758728	970.87	2627.54	4.15	4.13	2.51	2.79	6.31	7.8
ATP8A1|10396	ATPase phospholipid transporting 8A1	DOWN	DOWN	-0.758144	1.13339e-05	0.758144	1773.39	5278.33	7.58	8.3	1.93	1.89	3.73	3.57
PPP1R12B|4660	protein phosphatase 1 regulatory subunit 12B	DOWN	DOWN	-0.757644	2.1836e-06	0.757644	2238.58	6281.48	9.57	9.88	1.24	1.43	1.54	2.04
C10orf82|143379	chromosome 10 open reading frame 82	UP	UP	0.756657	0.0180749	0.756657	478.9	1341.94	2.05	2.11	2.28	2.35	5.2	5.52
PHYHIP|9796	phytanoyl-CoA 2-hydroxylase interacting protein	DOWN	DOWN	-0.756169	1.62568e-06	0.756169	1197.18	3387.72	5.12	5.33	2.09	2.3	4.35	5.28
CH25H|9023	cholesterol 25-hydroxylase	DOWN	DOWN	-0.755736	1.18831e-05	0.755736	1314.41	3853.74	5.62	6.06	1.74	1.89	3.01	3.59
KRTAP5-8|57830	keratin associated protein 5-8	UP	UP	0.755626	0.0022154	0.755626	234.54	576.77	1	0.91	1.26	1.05	1.59	1.1
UNC13A|23025	unc-13 homolog A	DOWN	DOWN	-0.755367	0.00609519	0.755367	1057.95	2814.98	4.52	4.43	2.57	2.79	6.6	7.76
SERPINI1|5274	serpin family I member 1	DOWN	DOWN	-0.754892	1.6402e-05	0.754892	1514.33	4314.56	6.47	6.78	1.54	1.72	2.37	2.96
FLRT1|23769	fibronectin leucine rich transmembrane protein 1	DOWN	DOWN	-0.75443	0.0018072	0.75443	909.68	2606.58	3.89	4.1	2.05	2.41	4.21	5.79
CD22|933	CD22 molecule	DOWN	DOWN	-0.754301	0.0249147	0.754301	1152.39	3539.81	4.92	5.57	1.96	2.07	3.85	4.28
LRRC4C|57689	leucine rich repeat containing 4C	DOWN	DOWN	-0.753733	0.00407217	0.753733	879.07	2689.53	3.76	4.23	2.71	2.74	7.34	7.5
ZNF98|148198	zinc finger protein 98	UP	UP	0.753369	0.00537072	0.753369	523.5	1255.83	2.24	1.97	2.11	1.81	4.46	3.28
ACTA1|58	actin, alpha 1, skeletal muscle	DOWN	DOWN	-0.753156	8.6117e-06	0.753156	666.1	1893.49	2.85	2.98	2.59	2.86	6.73	8.18
GAS1|2619	growth arrest specific 1	UP	UP	0.75155	1.68104e-05	0.75155	1873.36	4761.72	8.01	7.49	2.2	1.98	4.85	3.91
SERPIND1|3053	serpin family D member 1	DOWN	DOWN	-0.750876	2.5693e-05	0.750876	493.51	1525.7	2.11	2.4	2.01	2.34	4.05	5.49
CXCR2|3579	C-X-C motif chemokine receptor 2	DOWN	DOWN	-0.750588	0.000182174	0.750588	974.96	2802.94	4.17	4.41	1.89	2.14	3.58	4.57
C10orf95|79946	chromosome 10 open reading frame 95	DOWN	DOWN	-0.750092	2.4111e-05	0.750092	806.58	2621.39	3.45	4.12	1.48	1.89	2.2	3.57	153	153
C6orf103|79747	androglobin	DOWN	DOWN	-0.749966	0.0484363	0.749966	105.09	650.33	0.45	1.02	1.07	1.71	1.14	2.92
DDIT3|1649	DNA damage inducible transcript 3	UP	UP	0.749545	1.93204e-14	0.749545	2101.51	5419.58	8.98	8.52	1.14	0.86	1.3	0.73	95	95
TAGAP|117289	T cell activation RhoGTPase activating protein	DOWN	DOWN	-0.749486	1.70676e-08	0.749486	1501.84	4418.38	6.42	6.95	1.4	1.63	1.96	2.64	44	44
CLIC5|53405	chloride intracellular channel 5	DOWN	DOWN	-0.749466	6.542e-05	0.749466	1434.8	4545.29	6.13	7.15	2.04	2.09	4.16	4.39	90	130
KCNMB1|3779	potassium calcium-activated channel subfamily M regulatory beta subunit 1	DOWN	DOWN	-0.749444	0.00010998	0.749444	1441.11	4037.06	6.16	6.35	1.62	1.76	2.62	3.08
FAM55D|54827	neurexophilin and PC-esterase domain family member 4	DOWN	DOWN	-0.749142	0.0227962	0.749142	111.93	448.49	0.48	0.71	0.9	1.12	0.81	1.26
HOXC11|3227	homeobox C11	UP	UP	0.747768	0.00972838	0.747768	1112.04	2242.54	4.75	3.53	2.77	2.93	7.66	8.57	3	144
CD1E|913	CD1e molecule	DOWN	DOWN	-0.747622	0.00105637	0.747622	708.17	2350.08	3.03	3.7	1.97	2.22	3.86	4.91
PKHD1L1|93035	PKHD1 like 1	DOWN	DOWN	-0.745735	0.00866408	0.745735	507.35	2082.76	2.17	3.27	2.26	2.99	5.09	8.94
DMBX1|127343	diencephalon/mesencephalon homeobox 1	UP	UP	0.745467	0.00614562	0.745467	822.5	1885.6	3.51	2.96	2.46	2.33	6.05	5.42
MCF2L2|23101	MCF.2 cell line derived transforming sequence-like 2	DOWN	DOWN	-0.745004	0.000119931	0.745004	938.57	2631.46	4.01	4.14	1.62	1.98	2.62	3.93
FAM19A1|407738	family with sequence similarity 19 member A1, C-C motif chemokine like	DOWN	DOWN	-0.744683	0.00129619	0.744683	318.47	898.88	1.36	1.41	1.59	1.86	2.53	3.45
HOXC5|3222	homeobox C5	UP	UP	0.742752	0.00108947	0.742752	975.23	2080.11	4.17	3.27	2	2.1	4.02	4.42	37	144
DLGAP2|9228	DLG associated protein 2	DOWN	DOWN	-0.741514	5.51353e-05	0.741514	343.97	1131.72	1.47	1.78	1.84	1.95	3.4	3.81
KCNJ9|3765	potassium voltage-gated channel subfamily J member 9	DOWN	DOWN	-0.741223	0.045096	0.741223	331.31	877.05	1.42	1.38	2.53	2.93	6.41	8.59
CLDN2|9075	claudin 2	DOWN	DOWN	-0.740544	0.0244397	0.740544	799.57	2539.51	3.42	3.99	3.42	3.45	11.72	11.92
AVPR2|554	arginine vasopressin receptor 2	UP	UP	0.739595	0.000623361	0.739595	603.76	1734.84	2.58	2.73	1.86	1.58	3.46	2.49
DCUN1D5|84259	defective in cullin neddylation 1 domain containing 5	UP	UP	0.739111	2.26611e-05	0.739111	2122.5	5580.7	9.07	8.77	0.98	0.74	0.97	0.55
CRISPLD1|83690	cysteine rich secretory protein LCCL domain containing 1	UP	UP	0.738879	0.000170204	0.738879	1777.35	4744.39	7.6	7.46	2.56	2.2	6.58	4.86

## Sheet: 1G
Direction	Gene	EntrezID	Cliff_delta	Posterior_LFC
UP	ALDH8A1|64577	64577	-0.00638338	0.426494
UP	ADAT2|134637	134637	0.0821709	0.202934
UP	PLTP|5360	5360	0.0763452	0.573887
UP	ZNRD1|30834	30834	0.129764	0.161798
UP	FAM100B|283991	283991	0.131014	0.284956
UP	PSMC3IP|29893	29893	0.203032	0.231553
UP	TRMT1|55621	55621	0.115694	0.228311
UP	CBX8|57332	57332	0.0263264	0.141196
UP	C1orf91|56063	56063	0.049703	0.146842
UP	ZFAND2A|90637	90637	0.120679	0.188709
UP	ATP5G1|516	516	0.0701769	0.244525
UP	ATF5|22809	22809	0.00514702	0.142977
UP	ATP6AP1|537	537	0.0782804	0.157055
UP	CHI3L2|1117	1117	-0.0484868	0.703043
UP	GDF6|392255	392255	0.0817207	0.581014
UP	SGCG|6445	6445	0.0266825	0.877105
UP	DHODH|1723	1723	0.106965	0.140436
UP	LOC388789|388789	388789	0.0605682	0.152019
UP	GATA1|2623	2623	-0.0127533	0.705154
UP	PUS7|54517	54517	0.19005	0.260273
UP	SNCG|6623	6623	0.0717089	0.239741
UP	PYCR1|5831	5831	0.0326829	0.1585
UP	ZNF556|80032	80032	0.11652	0.378327
UP	CCT4|10575	10575	0.187739	0.16956
UP	BEGAIN|57596	57596	0.0797116	0.145798
UP	BCL7C|9274	9274	0.0656883	0.346401
UP	GXYLT1|283464	283464	0.0806254	0.229684
UP	CDKN1C|1028	1028	-0.0465248	0.230424
UP	FGFBP2|83888	83888	-0.0317892	0.426344
UP	FAM195B|348262	348262	0.0342015	0.207963
UP	ADAMTS15|170689	170689	-0.0165968	0.185269
UP	DLGAP5|9787	9787	0.19818	0.259183
UP	AKR1E2|83592	83592	0.0907918	0.22681
UP	HSPA6|3310	3310	0.0838978	1.21101
UP	MARCH9|92979	92979	0.0701634	1.54451
UP	YY2|404281	404281	0.0951527	0.152684
UP	PNLDC1|154197	154197	0.0227047	0.823841
UP	MAGOH|4116	4116	0.157743	0.160756
UP	ILVBL|10994	10994	0.187214	0.301079
UP	TCF15|6939	6939	0.16584	1.02614
UP	DENND2A|27147	27147	-0.0124442	0.617679
UP	MASTL|84930	84930	0.175886	0.188487
UP	FANCM|57697	57697	0.144271	0.165545
UP	COL28A1|340267	340267	0.0393485	0.158102
UP	TSC22D2|9819	9819	0.168165	0.0593113
UP	PIK3CA|5290	5290	0.0168252	0.218256
UP	C8orf38|137682	137682	0.179554	0.195731
UP	MSI1|4440	4440	0.0871432	0.414503
UP	RINL|126432	126432	0.023343	0.195902
UP	SALL4|57167	57167	0.197522	0.456178
UP	GRB7|2886	2886	0.104755	1.42275
UP	WDR85|92715	92715	0.103478	0.206431
UP	ABCB9|23457	23457	0.0985459	0.239088
UP	UCKL1|54963	54963	0.279162	0.333068
UP	PGK1|5230	5230	0.136631	0.170869
UP	KLF1|10661	10661	0.0173023	0.193539
UP	FLOT1|10211	10211	0.108598	0.237892
UP	FCHO1|23149	23149	0.0567382	0.213046
UP	IGFN1|91156	91156	-0.109035	1.11768
UP	ORC5L|5001	5001	0.162837	0.19333
UP	FZD2|2535	2535	0.0890179	0.480165
UP	B4GALT7|11285	11285	0.0409611	0.14586
UP	ATAD2|29028	29028	0.247433	0.290086
UP	ACSS3|79611	79611	0.00804978	0.242408
UP	TPCN2|219931	219931	0.092055	0.275569
UP	SLC38A3|10991	10991	0.0342082	0.441365
UP	TPTE|7179	7179	-0.0563417	0.594346
UP	RAC3|5881	5881	0.0423184	0.201834
UP	EBF3|253738	253738	0.0962345	0.887558
UP	CRY1|1407	1407	0.117575	0.16294
UP	YIF1B|90522	90522	0.121781	0.300709
UP	RHPN2|85415	85415	-0.0494544	0.182343
UP	C7orf11|136647	136647	0.160431	0.172636
UP	SGOL2|151246	151246	0.295651	0.357162
UP	C17orf89|284184	284184	0.113281	0.206083
UP	PCID2|55795	55795	0.0789523	0.224556
UP	TPD52L2|7165	7165	0.12881	0.180085
UP	TIGD1|200765	200765	0.0780586	0.213642
UP	ZNF444|55311	55311	-0.0155284	0.172289
UP	MYOC|4653	4653	-0.10671	1.17552
UP	ARF5|381	381	0.00938021	0.144339
UP	EFNB3|1949	1949	0.0931167	0.382068
UP	PLIN2|123	123	0.195264	0.401254
UP	LRRC14B|389257	389257	0.0022241	1.01854
UP	C18orf54|162681	162681	0.218338	0.249841
UP	LRFN4|78999	78999	0.136564	0.302261
UP	FIZ1|84922	84922	0.0285035	0.171613
UP	C1orf59|113802	113802	0.20197	0.304117
UP	TIGD7|91151	91151	0.102	0.140704
UP	XRCC3|7517	7517	0.162003	0.259777
UP	KCTD15|79047	79047	0.124268	0.214158
UP	ISG15|9636	9636	0.0870693	0.349861
UP	SDK2|54549	54549	0.00747191	0.173549
UP	EXOSC10|5394	5394	0.198624	0.117214
UP	YJEFN3|374887	374887	0.0854768	0.309257
UP	CD177|57126	57126	-0.0621002	0.215846
UP	APCDD1L|164284	164284	0.0890515	0.272225
UP	C6orf182|285753	285753	0.193678	0.254726
UP	C17orf75|64149	64149	0.179958	0.319191
UP	USP42|84132	84132	0.171773	0.187607
UP	CHRNE|1145	1145	0.032011	0.386653
UP	RAN|5901	5901	0.160243	0.12034
UP	RAD18|56852	56852	0.194922	0.230207
UP	CLDND2|125875	125875	0.0235043	0.228395
UP	ARHGAP11B|89839	89839	0.191165	0.224073
UP	FKBP1B|2281	2281	0.062369	0.151571
UP	TMTC1|83857	83857	0.0286513	0.355551
UP	KIAA1841|84542	84542	0.111313	0.167842
UP	ADAMTS16|170690	170690	-0.0202588	0.995915
UP	PLAC1|10761	10761	0.22233	1.08842
UP	TRAF4|9618	9618	0.12463	0.369765
UP	LMX1B|4010	4010	0.0847646	0.525549
UP	TBC1D3C|414060	414060	0.00602053	0.338415
UP	SLC10A4|201780	201780	0.0752164	1.25886
UP	PPIH|10465	10465	0.155405	0.207811
UP	C1orf53|388722	388722	0.0340402	0.161756
UP	PAF1|54623	54623	0.0887491	0.165551
UP	AKAP8L|26993	26993	0.170577	0.222842
UP	CGB7|94027	94027	0.0638069	0.213108
UP	FAM70A|55026	55026	-0.00321857	0.215498
UP	GDF15|9518	9518	-0.00811697	0.533256
UP	KPNA2|3838	3838	0.208138	0.267007
UP	TMEM81|388730	388730	0.182605	0.296084
UP	MARK4|57787	57787	0.0884871	0.138355
UP	MRPL15|29088	29088	0.141886	0.216653
UP	SLC25A39|51629	51629	0.0381659	0.181402
UP	FAM91A1|157769	157769	0.183129	0.227016
UP	ERAL1|26284	26284	0.226267	0.253678
UP	SNRPB|6628	6628	0.167728	0.285455
UP	PAK4|10298	10298	0.0589152	0.314105
UP	CCNE2|9134	9134	0.15308	0.421216
UP	C4orf7|260436	260436	-0.0865989	1.39696
UP	RAP1B|5908	5908	0.126552	0.573495
UP	TMEM205|374882	374882	-0.039671	0.157308
UP	C20orf107|388799	388799	0.153685	0.410175
UP	ZNF527|84503	84503	0.0572757	0.192443
UP	SUMO4|387082	387082	0.146583	0.344493
UP	FAM169B|283777	283777	-0.0596476	0.433026
UP	FAM128A|653784	653784	-0.0182229	0.173247
UP	PCOLCE|5118	5118	-0.00306402	0.369522
UP	HIST1H3G|8355	8355	0.0850468	0.610489
UP	SPATS1|221409	221409	-0.133218	0.875568
UP	IGFBP5|3488	3488	0.0282616	0.284546
UP	RNF139|11236	11236	0.150439	0.116046
UP	ACOT6|641372	641372	0.0947562	0.468897
UP	METTL13|51603	51603	0.0512283	0.182783
UP	TBX3|6926	6926	0.0887357	0.438525
UP	MRPL4|51073	51073	0.120921	0.206507
UP	SCNN1G|6340	6340	-0.0774606	0.446705
UP	HIST1H2AK|8330	8330	0.0268236	0.250483
UP	ABCA9|10350	10350	-0.115747	1.69462
UP	ZNF627|199692	199692	0.0561603	0.23859
UP	CHST8|64377	64377	0.0141913	0.634093
UP	NEU1|4758	4758	0.0825001	0.257703
UP	MDK|4192	4192	0.0237059	0.266277
UP	LTC4S|4056	4056	-0.108007	0.146672
UP	ACOT8|10005	10005	0.116782	0.242041
UP	RTN4R|65078	65078	0.0453959	0.180424
UP	RMND1|55005	55005	-0.017309	0.278275
UP	MED27|9442	9442	0.163448	0.226189
UP	ZDHHC19|131540	131540	0.0616702	0.952059
UP	DDX39|10212	10212	0.224789	0.367077
UP	ZNF883|169834	169834	0.201809	0.451016
UP	ADM|133	133	0.097444	0.268321
UP	SIX2|10736	10736	0.125457	0.235568
UP	FGFR4|2264	2264	0.0415054	0.31546
UP	ZIK1|284307	284307	0.106965	0.536991
UP	TDRD12|91646	91646	0.07271	0.362708
UP	PHTF1|10745	10745	-0.00424663	0.180948
UP	GJA4|2701	2701	-0.017645	0.162679
UP	TTC32|130502	130502	0.112274	0.275032
UP	TIMM16|51025	51025	0.0888163	0.29561
UP	ADRA1D|146	146	0.121143	1.172
UP	KLRG2|346689	346689	0.125128	0.640266
UP	UBE2V1|7335	7335	0.174884	0.195728
UP	MTP18|51537	51537	0.00688061	0.206481
UP	AMH|268	268	-0.0328374	0.168832
UP	FAHD2A|51011	51011	0.0674488	0.201308
UP	ALKBH6|84964	84964	0.106764	0.185623
UP	SNRPG|6637	6637	0.174797	0.233114
UP	CDCA8|55143	55143	0.230232	0.276594
UP	GSTM2|2946	2946	0.0065312	0.411009
UP	PPP5C|5536	5536	0.158698	0.100282
UP	TSLP|85480	85480	0.0245592	0.37171
UP	LMAN2L|81562	81562	0.114175	0.232242
UP	ELAVL1|1994	1994	0.152254	0.112428
UP	ATG4D|84971	84971	0.0625302	0.216313
UP	ABCA10|10349	10349	-0.0256746	0.466537
UP	NAT2|10	10	0.00147826	1.76329
UP	RFNG|5986	5986	0.0430307	0.163691
UP	HAUS7|55559	55559	0.193645	0.364022
UP	PDRG1|81572	81572	0.295813	0.35176
UP	TRIM28|10155	10155	0.057531	0.166679
UP	SPC25|57405	57405	0.292923	0.418138
UP	ZNF565|147929	147929	0.148592	0.150473
UP	POLR2D|5433	5433	0.185199	0.133829
UP	TNFRSF11B|4982	4982	0.0727168	0.163824
UP	NEIL3|55247	55247	0.182041	0.170504
UP	C11orf95|65998	65998	0.0602927	0.297636
UP	MRTO4|51154	51154	0.201345	0.215664
UP	ZGLP1|100125288	100125288	0.0734828	0.530143
UP	BRF1|2972	2972	0.0310165	0.177724
UP	TIGD5|84948	84948	0.114162	0.208674
UP	SNAI2|6591	6591	0.0997151	0.177041
UP	KBTBD2|25948	25948	0.19343	0.111805
UP	PPIA|5478	5478	0.180226	0.17681
UP	ZNF286A|57335	57335	0.100132	0.166309
UP	SLC16A13|201232	201232	0.0675563	0.212775
UP	SMPD2|6610	6610	-0.0152932	0.198455
UP	PRG4|10216	10216	-0.0403833	1.25136
UP	TRIM63|84676	84676	-0.00434742	0.893698
UP	CCNE1|898	898	0.159867	0.805105
UP	C8orf76|84933	84933	0.260187	0.290283
UP	BARX2|8538	8538	-0.0121351	0.165151
UP	TPX2|22974	22974	0.310582	0.412767
UP	HAP1|9001	9001	0.132626	0.140592
UP	TNFAIP6|7130	7130	0.222955	0.451321
UP	TET3|200424	200424	0.0875598	0.141114
UP	RFPL2|10739	10739	0.0693302	0.22118
UP	PPP4C|5531	5531	0.0864511	0.207369
UP	ANLN|54443	54443	0.173252	0.127535
UP	KIR2DL3|3804	3804	-0.0273074	0.363929
UP	ECT2|1894	1894	0.151132	0.176196
UP	ISYNA1|51477	51477	0.0515105	0.207828
UP	IGSF9|57549	57549	0.0516583	0.274868
UP	S100PBP|64766	64766	0.156467	0.0925508
UP	TIMELESS|8914	8914	0.184191	0.128913
UP	CACNA1G|8913	8913	-0.060165	0.146911
UP	PSMB4|5692	5692	0.0748401	0.153939
UP	C16orf13|84326	84326	0.0222545	0.180674
UP	CHMP2B|25978	25978	0.0330659	0.145903
UP	DCAF15|90379	90379	0.18915	0.261152
UP	PAICS|10606	10606	0.16074	0.170564
UP	HOXD13|3239	3239	0.247312	0.596951
UP	HOXA11|3207	3207	0.124469	0.144074
UP	KATNA1|11104	11104	0.225313	0.207238
UP	CCDC142|84865	84865	0.165605	0.234803
UP	IGDCC4|57722	57722	0.0763183	0.795528
UP	PSMA4|5685	5685	0.127533	0.165592
UP	CHAF1A|10036	10036	0.188941	0.131226
UP	ATP6V1B1|525	525	0.0570271	0.49881
UP	NADSYN1|55191	55191	-0.0283288	0.195867
UP	C1orf56|54964	54964	0.0301564	0.143734
UP	BVES|11149	11149	0.0894479	0.324353
UP	LRRC34|151827	151827	0.0264877	0.178464
UP	MYO7B|4648	4648	0.0264205	0.532211
UP	UGT3A2|167127	167127	-0.0233027	1.14921
UP	SPCS1|28972	28972	0.0523571	0.170893
UP	IER5L|389792	389792	0.0259098	0.155923
UP	CDK6|1021	1021	0.14241	0.36874
UP	MLL4|9757	9757	0.0805986	0.171098
UP	ESM1|11082	11082	0.155123	0.533496
UP	SNRPF|6636	6636	0.164436	0.529379
UP	MT3|4504	4504	-0.0652314	0.17847
UP	AIMP2|7965	7965	0.142188	0.145403
UP	XPOT|11260	11260	0.176195	0.202694
UP	TMEM183A|92703	92703	0.05272	0.177212
UP	C14orf2|9556	9556	0.110708	0.174098
UP	DPF3|8110	8110	-0.0257418	0.23111
UP	AGAP6|414189	414189	0.0833871	0.198447
UP	CILP2|148113	148113	0.0742622	0.371865
UP	SLC5A12|159963	159963	0.159128	0.425623
UP	H2AFB1|474382	474382	0.0428829	1.25329
UP	RSPO4|343637	343637	0.0550113	0.723431
UP	UBL4A|8266	8266	0.117857	0.15585
UP	NDUFA4L2|56901	56901	0.0852954	0.40319
UP	SLC35C2|51006	51006	0.116016	0.172536
UP	ACER2|340485	340485	0.0273343	0.937527
UP	PSRC1|84722	84722	0.205343	0.784117
UP	PTGES|9536	9536	0.125155	0.268709
UP	HIST1H2AE|3012	3012	0.0237327	0.343004
UP	ZNF446|55663	55663	0.0235849	0.144617
UP	ARL6IP1|23204	23204	0.192516	0.192673
UP	KAT2A|2648	2648	0.110157	0.173276
UP	EVC2|132884	132884	0.0385556	0.15511
UP	PLAGL1|5325	5325	0.0667433	0.404165
UP	EPHA6|285220	285220	-0.0639279	0.404029
UP	DDX28|55794	55794	0.117871	0.144419
UP	OIP5|11339	11339	0.237193	0.335407
UP	BCL2L10|10017	10017	0.0486817	0.244864
UP	NGF|4803	4803	0.00979681	0.455076
UP	PIGF|5281	5281	0.144668	0.151908
UP	KCNK15|60598	60598	-0.0299212	0.214639
UP	IFT52|51098	51098	0.225528	0.2604
UP	ADAM11|4185	4185	0.152018	0.429656
UP	GLO1|2739	2739	0.162447	0.264853
UP	TSEN54|283989	283989	0.0240485	0.159182
UP	BDKRB1|623	623	0.102121	0.362612
UP	TBX2|6909	6909	0.0746587	0.383614
UP	CD36|948	948	0.0310703	1.05921
UP	NID1|4811	4811	0.148175	0.166643
UP	C5orf13|9315	9315	0.0463097	0.285669
UP	POLN|353497	353497	-0.0741144	0.414003
UP	FIGNL1|63979	63979	0.18411	0.13281
UP	PPP2R3B|28227	28227	0.117575	0.161392
UP	RBM44|375316	375316	0.159806	0.191876
UP	CARM1|10498	10498	0.0395501	0.157615
UP	SEMA6D|80031	80031	0.00592646	0.273479
UP	BIRC5|332	332	0.218103	0.471492
UP	TRMT6|51605	51605	0.179635	0.142129
UP	UBE2T|29089	29089	0.242125	0.461316
UP	MYCN|4613	4613	-0.0804373	0.706956
UP	GALNT8|26290	26290	0.132499	0.363976
UP	SLC5A6|8884	8884	0.132344	0.226822
UP	PDE6G|5148	5148	-0.0193988	0.239342
UP	EPO|2056	2056	0.159249	-0.0742117
UP	RPL23|9349	9349	0.0365264	0.144543
UP	DEPDC1|55635	55635	0.244396	0.284372
UP	CHPF|79586	79586	0.0118126	0.182462
UP	PPT2|9374	9374	0.158993	0.0190819
UP	NUP155|9631	9631	0.1879	0.239542
UP	FBXO39|162517	162517	0.185897	0.586057
UP	MAGIX|79917	79917	-0.0559318	0.169365
UP	L3MBTL|26013	26013	0.0349406	0.161627
UP	FSD1|79187	79187	0.130154	0.279634
UP	KIF23|9493	9493	0.285236	0.426005
UP	ROR1|4919	4919	-0.0914436	0.152207
UP	AATF|26574	26574	0.107657	0.334557
UP	KDELR2|11014	11014	0.158765	0.225516
UP	FBN1|2200	2200	0.0118664	0.383371
UP	DOK5|55816	55816	0.0207359	0.237782
UP	ALG1L|200810	200810	0.0134521	0.50631
UP	FAM110A|83541	83541	0.0435682	0.172156
UP	CDC42EP2|10435	10435	0.0194324	0.269666
UP	SLC12A8|84561	84561	0.0321319	0.212398
UP	C21orf58|54058	54058	0.0611326	0.245993
UP	UBE2M|9040	9040	0.0199363	0.163899
UP	DHRS11|79154	79154	0.0743428	0.389828
UP	FAM104B|90736	90736	0.0864645	0.184104
UP	MRPS9|64965	64965	0.104163	0.160328
UP	GNAS|2778	2778	0.0696527	0.278969
UP	LCN10|414332	414332	-0.111145	0.179076
UP	MEOX2|4223	4223	0.0778235	0.939165
UP	RACGAP1|29127	29127	0.27552	0.30809
UP	THOC1|9984	9984	0.104728	0.229291
UP	GUCY2D|3000	3000	0.0504287	0.686186
UP	NPDC1|56654	56654	-0.0356529	0.212732
UP	CCNB2|9133	9133	0.281541	0.432755
UP	HIST1H2BF|8343	8343	-0.0274149	0.370735
UP	C16orf93|90835	90835	-0.00980353	0.188539
UP	C5orf60|285679	285679	-0.00426679	0.202241
UP	USP39|10713	10713	0.163199	0.0977261
UP	FAM72B|653820	653820	0.322596	0.586844
UP	FAM174B|400451	400451	-0.0528006	0.169917
UP	CALCB|797	797	0.0836021	1.89029
UP	SBK1|388228	388228	-0.0560125	0.218653
UP	TBX1|6899	6899	0.196474	0.688652
UP	DARS2|55157	55157	0.145917	0.195583
UP	FOXS1|2307	2307	0.00547627	0.296263
UP	LGALS2|3957	3957	-0.101355	0.374283
UP	WBSCR28|135886	135886	0.0229734	0.454591
UP	PABPN1|8106	8106	0.0601247	0.149289
UP	CRIPT|9419	9419	0.109552	0.176934
UP	ZNF354B|117608	117608	0.0580417	0.144489
UP	LGR6|59352	59352	-0.0226039	0.21021
UP	ADRA2B|151	151	0.184036	0.63532
UP	COX7A2|1347	1347	0.0638875	0.186937
UP	SMN1|6606	6606	0.0406386	0.269406
UP	FUT1|2523	2523	0.0719239	0.150022
UP	CBX2|84733	84733	0.136295	0.491799
UP	GALNT6|11226	11226	-0.0417406	0.141152
UP	PPDPF|79144	79144	0.0419287	0.189813
UP	TPSAB1|7177	7177	-0.127903	1.62202
UP	RHBDD3|25807	25807	0.0308552	0.165469
UP	TSEN34|79042	79042	0.0707278	0.170053
UP	DZIP1|22873	22873	0.113611	0.376971
UP	HSP90AA1|3320	3320	0.130678	0.145223
UP	GSTM1|2944	2944	-0.0367212	0.528947
UP	CD34|947	947	-0.0475461	0.320863
UP	TMEM9|252839	252839	0.0286782	0.161103
UP	GPR156|165829	165829	0.201641	0.517735
UP	LOC613037|613037	613037	-0.0299952	0.203865
UP	MRPL9|65005	65005	0.161076	0.195003
UP	C1QL4|338761	338761	0.0644856	0.421562
UP	FLG|2312	2312	-0.111622	0.157579
UP	SIVA1|10572	10572	0.104916	0.333175
UP	SLC7A8|23428	23428	0.0202387	0.236035
UP	HOXC6|3223	3223	0.253299	0.585827
UP	WDR53|348793	348793	0.149855	0.19015
UP	CDCA4|55038	55038	0.168252	0.423712
UP	MAPRE1|22919	22919	0.228525	0.132845
UP	C12orf24|29902	29902	0.14327	0.26511
UP	NDUFAF4|29078	29078	0.161882	0.244811
UP	ORC6L|23594	23594	0.199968	0.508926
UP	GTPBP2|54676	54676	0.124543	0.164839
UP	DCUN1D5|84259	84259	0.166579	0.739111
UP	C2CD4B|388125	388125	-0.0519473	0.437262
UP	FAM166A|401565	401565	-0.0101932	0.196852
UP	RNF34|80196	80196	0.0596409	0.160554
UP	MCCC1|56922	56922	0.0720583	0.150786
UP	GATM|2628	2628	0.0283691	0.199116
UP	HIST1H4H|8365	8365	0.0515374	0.299355
UP	SHOX2|6474	6474	0.271119	0.604693
UP	C20orf152|140894	140894	0.135556	0.254249
UP	TBP|6908	6908	0.162138	0.167192
UP	CHKA|1119	1119	0.0522362	0.257071
UP	CA9|768	768	0.0658026	0.323056
UP	CENPF|1063	1063	0.248629	0.385916
UP	TRIO|7204	7204	0.122682	0.215111
UP	EGFLAM|133584	133584	0.0846369	0.174866
UP	MORN3|283385	283385	-0.0321386	0.139649
UP	OR13A1|79290	79290	0.0758816	0.296197
UP	CCDC77|84318	84318	0.200156	0.265096
UP	LY6E|4061	4061	0.0330189	0.242551
UP	BST2|684	684	0.00912487	0.291421
UP	HJURP|55355	55355	0.248481	0.380855
UP	ULBP2|80328	80328	0.204174	0.100234
UP	TOMM6|100188893	100188893	0.128124	0.32579
UP	BLOC1S3|388552	388552	0.157206	0.176624
UP	TBX20|57057	57057	0.123226	0.203739
UP	BANF1|8815	8815	0.114592	0.212652
UP	LZTR1|8216	8216	0.0664879	0.230842
UP	WIPI2|26100	26100	0.161802	0.141955
UP	OLFML1|283298	283298	-0.054803	0.311456
UP	NUDT14|256281	256281	-0.0445761	0.152262
UP	HOXA13|3209	3209	0.186086	0.137194
UP	NEDD1|121441	121441	0.158503	0.0267322
UP	UBA52|7311	7311	0.0772725	0.197739
UP	ATP6V0A2|23545	23545	0.115962	0.21131
UP	HPGD|3248	3248	-0.106757	0.537795
UP	CHSY3|337876	337876	0.0309493	0.191964
UP	ALG11|440138	440138	0.100763	0.186176
UP	PAMR1|25891	25891	-0.0285572	0.425851
UP	HIST1H1E|3008	3008	0.0560461	0.452632
UP	C3orf31|132001	132001	0.0883997	0.224609
UP	C3orf21|152002	152002	0.125672	0.240489
UP	HOXB9|3219	3219	0.0680132	0.271001
UP	UCK2|7371	7371	0.139574	0.157084
UP	VKORC1|79001	79001	0.0401615	0.186796
UP	SMUG1|23583	23583	0.118207	0.232082
UP	PDGFRA|5156	5156	-0.0114094	0.173557
UP	MMP1|4312	4312	0.0804373	0.147988
UP	TUBB3|10381	10381	0.061052	0.281564
UP	CITED1|4435	4435	0.0122762	0.150813
UP	TBX18|9096	9096	0.0603263	0.235182
UP	C19orf60|55049	55049	0.140031	0.352746
UP	TTL|150465	150465	0.20193	0.169937
UP	MESP1|55897	55897	-0.0426544	0.425624
UP	C4orf49|84709	84709	0.0337916	0.277877
UP	LYSMD4|145748	145748	0.12799	0.220688
UP	OAS1|4938	4938	0.107751	0.201398
UP	EGFL7|51162	51162	0.0637935	0.377953
UP	BOLA2|552900	552900	0.131847	0.298268
UP	TOMM20L|387990	387990	0.0928345	0.151105
UP	C5orf39|389289	389289	0.0641698	0.271966
UP	KRT20|54474	54474	0.00152529	0.348012
UP	PHPT1|29085	29085	-0.0328307	0.14476
UP	ZNF676|163223	163223	0.0286244	0.232441
UP	AHNAK2|113146	113146	0.00399129	0.159769
UP	DCAF12L2|340578	340578	-0.0253521	0.442812
UP	SLC35A2|7355	7355	0.0926867	0.157471
UP	LIPT2|387787	387787	0.0244181	0.156492
UP	ZNF257|113835	113835	0.0304454	0.568294
UP	FUCA2|2519	2519	0.113187	0.185881
UP	DNM1|1759	1759	0.17008	0.0948721
UP	ARC|23237	23237	0.0538421	1.4381
UP	ZNF285|26974	26974	0.0834543	0.240483
UP	WDR62|284403	284403	0.235204	0.299382
UP	VAPB|9217	9217	0.164422	0.119562
UP	COMMD2|51122	51122	0.14753	0.195115
UP	WNT9B|7484	7484	-0.0472908	0.185326
UP	NFS1|9054	9054	0.195331	0.149079
UP	C13orf27|93081	93081	0.145024	0.205876
UP	PAPPA2|60676	60676	0.0882116	0.307736
UP	PBX4|80714	80714	0.0940708	0.467916
UP	PDK3|5165	5165	0.0917325	0.211796
UP	GJA1|2697	2697	0.0241426	0.14431
UP	TWIST2|117581	117581	-0.0284497	0.210757
UP	PXMP2|5827	5827	0.0134521	0.181799
UP	GPBAR1|151306	151306	-0.00376283	0.350215
UP	STON2|85439	85439	0.0458797	0.210082
UP	TMEM116|89894	89894	-0.0216363	0.153478
UP	FXYD4|53828	53828	0.03699	1.93714
UP	C9orf173|441476	441476	-0.000241896	0.773151
UP	BLCAP|10904	10904	0.155486	0.167893
UP	PLEKHA6|22874	22874	-0.0746788	0.19192
UP	KCNK7|10089	10089	0.0412568	0.386365
UP	SYCE1L|100130958	100130958	-0.0351422	0.435538
UP	COMMD4|54939	54939	0.0839784	0.211168
UP	C1QTNF2|114898	114898	0.060669	0.659653
UP	ZNF695|57116	57116	0.1122	0.471809
UP	AMMECR1L|83607	83607	0.16496	0.109087
UP	DNMT3B|1789	1789	0.245525	0.805016
UP	SCARA5|286133	286133	-0.0878017	2.2532
UP	GALK1|2584	2584	0.0389991	0.144343
UP	NFKBIB|4793	4793	0.07441	0.255177
UP	PALM|5064	5064	0.0551255	0.308452
UP	KRT23|25984	25984	-0.0514971	0.539004
UP	GAP43|2596	2596	0.103088	0.587163
UP	LOXHD1|125336	125336	-0.0379643	0.650496
UP	DPH3|285381	285381	0.158234	0.137609
UP	PSMD11|5717	5717	0.190534	0.278922
UP	MT1G|4495	4495	-0.0156695	0.190358
UP	C19orf73|55150	55150	0.0716954	0.284337
UP	TBC1D7|51256	51256	0.0605816	0.261622
UP	COX6B2|125965	125965	0.0424663	0.236191
UP	AVIL|10677	10677	0.127587	0.894445
UP	AVPR1A|552	552	0.0593789	0.187139
UP	FAM22F|54754	54754	0.0730998	0.513373
UP	JAG1|182	182	0.105279	0.139617
UP	FBN3|84467	84467	0.00452212	0.711296
UP	KRAS|3845	3845	0.0566172	0.418869
UP	NECAB2|54550	54550	0.0876808	0.787716
UP	KRTAP5-1|387264	387264	-0.115324	0.14379
UP	MSH2|4436	4436	0.16875	0.170468
UP	LRWD1|222229	222229	0.0837902	0.178278
UP	PNPT1|87178	87178	0.262028	0.236182
UP	UTS2|10911	10911	-0.0156695	2.76665
UP	AKR1B1|231	231	0.158913	0.241979
UP	HHIPL1|84439	84439	0.0648014	0.171075
UP	ANKRD27|84079	84079	0.132613	0.201262
UP	CNR1|1268	1268	-0.0560461	0.353274
UP	HOXC10|3226	3226	0.237583	0.484251
UP	H3F3A|3020	3020	0.0496291	0.16722
UP	LAMA1|284217	284217	0.0131094	0.22439
UP	PDCD6|10016	10016	0.137868	0.178914
UP	PYY|5697	5697	-0.119618	0.905235
UP	ESRRB|2103	2103	0.114222	0.148467
UP	PFKFB4|5210	5210	0.0677579	0.189495
UP	MFSD2A|84879	84879	0.0181691	0.294583
UP	MYL12B|103910	103910	0.076829	0.224328
UP	ADAMTS5|11096	11096	-0.0386026	0.976132
UP	DLX1|1745	1745	0.136544	0.627308
UP	MAGEA11|4110	4110	0.166384	0.156261
UP	KLHL29|114818	114818	0.141913	0.292961
UP	XRCC6BP1|91419	91419	0.137894	0.782927
UP	LHX4|89884	89884	0.132768	0.558252
UP	UBXN2A|165324	165324	0.154599	0.116497
UP	CTNNBL1|56259	56259	0.266019	0.21188
UP	UNG|7374	7374	0.166203	0.131998
UP	CDC34|997	997	0.118368	0.248733
UP	QPRT|23475	23475	-0.0383272	0.154136
UP	CALB2|794	794	0.0118395	1.06378
UP	CEP152|22995	22995	0.167446	0.168181
UP	IMPDH1|3614	3614	0.0795033	0.190675
UP	PKD1L1|168507	168507	0.0566642	0.417104
UP	DBF4B|80174	80174	0.160256	0.28516
UP	DLX4|1748	1748	0.0850736	0.287825
UP	EIF1|10209	10209	0.170524	0.10599
UP	RNF2|6045	6045	0.198073	0.150965
UP	GRB10|2887	2887	0.107295	0.1703
UP	GCNT7|140687	140687	0.0923507	0.38414
UP	AURKC|6795	6795	0.161036	0.469791
UP	CREB3L4|148327	148327	-0.0699014	0.223294
UP	C19orf69|100170765	100170765	0.0980353	0.611163
UP	MCM4|4173	4173	0.156561	0.109051
UP	HOXA2|3199	3199	0.237623	1.43969
UP	SOX15|6665	6665	0.0275426	0.168448
UP	COX6C|1345	1345	0.109109	0.186144
UP	PSMA7|5688	5688	0.293945	0.280287
UP	TRIM50|135892	135892	-0.0392477	0.493913
UP	PSMD3|5709	5709	0.226805	0.444527
UP	CEACAM16|388551	388551	0.0405647	1.15577
UP	CHST7|56548	56548	0.0636053	0.328063
UP	ZNF764|92595	92595	0.0252983	0.138723
UP	PIF1|80119	80119	0.254757	0.591289
UP	UAP1L1|91373	91373	0.0737381	0.20208
UP	VN1R1|57191	57191	0.157394	0.40646
UP	RNF8|9025	9025	0.0418212	0.161
UP	C19orf48|84798	84798	0.100118	0.157211
UP	LYPD6B|130576	130576	0.086646	0.359692
UP	LZIC|84328	84328	0.187174	0.13534
UP	OGFR|11054	11054	0.0774606	0.156643
UP	GPR172A|79581	79581	0.0596275	0.193777
UP	RCCD1|91433	91433	0.0912487	0.14666
UP	ALPK2|115701	115701	0.0759488	0.216385
UP	U2AF1|7307	7307	0.0748535	0.139013
UP	ZNF813|126017	126017	0.0670322	0.165746
UP	LCLAT1|253558	253558	0.143996	0.175998
UP	C3orf72|401089	401089	0.0721255	0.289388
UP	LOXL1|4016	4016	0.0504085	0.441371
UP	CYP39A1|51302	51302	-0.0643982	0.181361
UP	CIRH1A|84916	84916	0.158442	0.117411
UP	KLHDC8A|55220	55220	0.00583239	1.35574
UP	CDK16|5127	5127	0.119638	0.191811
UP	TCFL5|10732	10732	0.225138	0.237789
UP	CSE1L|1434	1434	0.280654	0.314953
UP	SLC22A16|85413	85413	-0.00262726	0.305333
UP	RNF128|79589	79589	0.0455303	0.591209
UP	SLC22A13|9390	9390	0.119302	0.193614
UP	HEATR4|399671	399671	0.105158	0.260374
UP	TIPIN|54962	54962	0.154962	0.103376
UP	SOAT2|8435	8435	0.0595267	0.648112
UP	FNDC5|252995	252995	0.101953	0.594086
UP	C7orf46|340277	340277	0.0323201	0.333199
UP	C17orf96|100170841	100170841	0.171908	0.396786
UP	SPNS1|83985	83985	0.176343	0.249341
UP	CHCHD2|51142	51142	0.133621	0.527289
UP	TPRA1|131601	131601	0.106891	0.22893
UP	YEATS2|55689	55689	0.102672	0.143844
UP	C20orf24|55969	55969	0.18841	0.178046
UP	RPF1|80135	80135	0.14753	0.0883136
UP	C19orf2|8725	8725	0.183478	0.509084
UP	FTSJ2|29960	29960	0.235016	0.134891
UP	SLC38A4|55089	55089	0.0594998	1.88381
UP	TMSB10|9168	9168	0.0306402	0.177258
UP	ANO7|50636	50636	0.102967	0.195062
UP	SPESP1|246777	246777	0.0255268	0.36999
UP	SNAPC1|6617	6617	0.0894412	0.239651
UP	MXRA8|54587	54587	0.0421706	0.231305
UP	ZNF416|55659	55659	0.149694	0.191074
UP	MRM1|79922	79922	0.033422	0.256546
UP	CKS2|1164	1164	0.185286	0.316785
UP	PTH2R|5746	5746	0.0452817	1.17437
UP	ZNF43|7594	7594	0.0315944	0.303125
UP	DOCK6|57572	57572	0.113113	0.152363
UP	CRTC2|200186	200186	0.0399398	0.156965
UP	NUDT19|390916	390916	0.0744235	0.298839
UP	RAD23A|5886	5886	0.0842606	0.180023
UP	TMED2|10959	10959	0.0690211	0.147792
UP	SFMBT1|51460	51460	0.155123	0.160558
UP	SLC38A8|146167	146167	-0.062537	0.1619
UP	CCNL2|81669	81669	0.0996949	0.145179
UP	CHRD|8646	8646	-0.030479	0.474758
UP	NAALAD2|10003	10003	0.0297936	0.167049
UP	PDE7A|5150	5150	0.0836895	0.253671
UP	PTX3|5806	5806	0.169596	2.04938
UP	PALM3|342979	342979	0.0452414	0.319311
UP	CYP26B1|56603	56603	0.0736037	0.249744
UP	EMD|2010	2010	0.0558243	0.173374
UP	TUBE1|51175	51175	0.1122	0.25626
UP	C11orf84|144097	144097	0.125746	0.270706
UP	TXNL4A|10907	10907	0.00206956	0.15255
UP	KRTAP5-10|387273	387273	0.0444485	1.27775
UP	CACNA1F|778	778	-0.0515911	0.324931
UP	ZNF491|126069	126069	0.0191501	0.18736
UP	ZNF383|163087	163087	0.087123	0.143995
UP	PTCH2|8643	8643	-0.0592512	0.262469
UP	CHST12|55501	55501	0.0682887	0.183801
UP	FBXW9|84261	84261	0.0726899	0.209866
UP	FBN2|2201	2201	0.070795	0.680736
UP	NCBP2|22916	22916	0.158052	0.108542
UP	POLDIP2|26073	26073	0.116823	0.179278
UP	FAM98C|147965	147965	0.0278987	0.195622
UP	NANP|140838	140838	0.183539	0.127155
UP	FUNDC1|139341	139341	0.159403	0.191026
UP	C2orf82|389084	389084	0.00449524	1.14538
UP	WT1|7490	7490	0.0883124	1.34343
UP	ZNF768|79724	79724	0.00737784	0.150031
UP	C20orf118|140711	140711	-0.0413777	0.187654
UP	COX4I2|84701	84701	0.0908993	0.707523
UP	ACYP1|97	97	0.215106	0.319097
UP	GPR19|2842	2842	0.163549	0.183772
UP	CHAC1|79094	79094	-0.0118126	0.175127
UP	ATP6V1E2|90423	90423	0.146663	0.277117
UP	AAGAB|79719	79719	0.115008	0.153857
UP	KIAA1024|23251	23251	0.0594797	0.260329
UP	GPR172B|55065	55065	0.00939365	0.217317
UP	GRK5|2869	2869	0.0362912	0.32356
UP	GLT25D1|79709	79709	0.144063	0.25603
UP	MDM2|4193	4193	0.00346718	1.55369
UP	PRKRIP1|79706	79706	0.0735231	0.150109
UP	ZNF639|51193	51193	0.156615	0.115968
UP	PLSCR2|57047	57047	0.0428896	0.181364
UP	DNAJB11|51726	51726	0.143337	0.145567
UP	RSBN1|54665	54665	-0.0612267	0.217097
UP	RPUSD1|113000	113000	0.0565433	0.143681
UP	SOX13|9580	9580	-0.0568188	0.201415
UP	PCNA|5111	5111	0.197831	0.166942
UP	ZNF781|163115	163115	0.0239276	0.231599
UP	KCNK9|51305	51305	0.0881108	0.730129
UP	C16orf59|80178	80178	0.158254	0.425748
UP	TMEM194A|23306	23306	0.270843	0.291312
UP	TOPBP1|11073	11073	0.156184	0.0764018
UP	AMHR2|269	269	-0.0724211	1.62472
UP	NOX1|27035	27035	-0.104036	1.16435
UP	PGC|5225	5225	-0.0599231	0.327278
UP	TPST1|8460	8460	0.137048	0.382682
UP	NFYA|4800	4800	0.0102336	0.244845
UP	HPD|3242	3242	0.0630879	0.246649
UP	DCAF13|25879	25879	0.199591	0.211692
UP	UTP6|55813	55813	0.17098	0.14866
UP	YDJC|150223	150223	0.0103881	0.218293
UP	SS18L1|26039	26039	0.137505	0.185492
UP	VGLL3|389136	389136	0.00545611	0.68374
UP	TNFRSF8|943	943	-0.0824397	0.433857
UP	ZNF773|374928	374928	0.0979949	0.178692
UP	DEK|7913	7913	0.120774	0.155867
UP	SOX11|6664	6664	0.144459	0.783903
UP	TCEB1|6921	6921	0.160613	0.162295
UP	ITGA7|3679	3679	0.0759824	0.161028
UP	GCLM|2730	2730	0.0840053	0.146335
UP	C14orf153|84334	84334	0.084395	0.190524
UP	TAZ|6901	6901	0.154652	0.217773
UP	CCDC8|83987	83987	0.103196	0.555614
UP	NTNG1|22854	22854	-0.0364256	0.241639
UP	NEURL2|140825	140825	0.109942	0.36502
UP	NETO2|81831	81831	0.184554	0.21587
UP	FKBP1A|2280	2280	0.145501	0.155323
UP	POU2F3|25833	25833	0.0101126	0.178863
UP	ALAS2|212	212	0.119295	0.183741
UP	SIP1|8487	8487	0.149895	0.142417
UP	KNTC1|9735	9735	0.174918	0.128928
UP	CPS1|1373	1373	0.00238537	0.593307
UP	INHBB|3625	3625	0.0514299	0.331939
UP	HSPA1A|3303	3303	0.100199	0.368625
UP	HOXC5|3222	3222	0.247628	0.742752
UP	EBF2|64641	64641	0.0864645	1.41209
UP	SPSB4|92369	92369	0.0693235	0.787409
UP	FZD4|8322	8322	0.00186798	0.141323
UP	RFX4|5992	5992	0.0743496	0.223255
UP	B4GALNT1|2583	2583	0.137962	1.16218
UP	TMEM52|339456	339456	0.0101059	0.19861
UP	KRTCAP2|200185	200185	0.0652852	0.174192
UP	HSD17B2|3294	3294	-0.00491856	0.186571
UP	CCR10|2826	2826	-0.0346785	0.13792
UP	ITLN1|55600	55600	0.0259232	3.92492
UP	APLN|8862	8862	0.127708	0.582756
UP	ASIP|434	434	0.0631215	1.05503
UP	PIK3C2B|5287	5287	0.037373	0.279897
UP	TRAPPC2P1|10597	10597	0.111017	0.184001
UP	B3GNT9|84752	84752	0.0149169	0.204485
UP	ALPI|248	248	-0.00863436	2.14248
UP	KIF14|9928	9928	0.248602	0.411169
UP	ITGA5|3678	3678	0.127708	0.441916
UP	MAGEA2|4101	4101	0.170772	0.838406
UP	RPS26|6231	6231	0.00460947	0.173947
UP	CCDC58|131076	131076	0.0945479	0.250219
UP	ILF2|3608	3608	0.188451	0.208092
UP	PABPC1|26986	26986	0.0256746	0.204847
UP	PPIL1|51645	51645	0.14833	0.128298
UP	RECQL4|9401	9401	0.196359	0.393225
UP	GPSM1|26086	26086	0.0669113	0.172621
UP	COPE|11316	11316	0.00909799	0.138578
UP	FAM189B|10712	10712	0.0816266	0.202989
UP	ADCYAP1|116	116	-0.0115371	2.25708
UP	GSC|145258	145258	0.109532	0.675477
UP	CABLES2|81928	81928	0.172029	0.226424
UP	FAM163A|148753	148753	-0.050516	0.321064
UP	AK3L1|205	205	0.137196	0.242881
UP	MRPL34|64981	64981	0.0259501	0.141702
UP	RBP7|116362	116362	0.0782535	0.927873
UP	POU5F1B|5462	5462	-0.013694	0.210327
UP	FAM69B|138311	138311	-0.00352094	0.398216
UP	IGFBP4|3487	3487	-0.00495888	0.166129
UP	ERBB2|2064	2064	0.0595872	1.51384
UP	QSOX2|169714	169714	0.135475	0.2092
UP	LSM10|84967	84967	0.112751	0.140518
UP	TINAGL1|64129	64129	0.0234371	0.449351
UP	GPS1|2873	2873	0.0532172	0.148146
UP	MARVELD1|83742	83742	0.0844084	0.146887
UP	YAP1|10413	10413	-0.0443477	0.444442
UP	WNT2B|7482	7482	0.0330054	0.228334
UP	THUMPD2|80745	80745	0.135072	0.154737
UP	GET4|51608	51608	0.156232	0.208594
UP	SFRS3|6428	6428	0.149882	0.130937
UP	BCAT1|586	586	0.0400473	0.368749
UP	SNF8|11267	11267	0.145743	0.210721
UP	KDELC1|79070	79070	0.181026	0.330415
UP	EFEMP2|30008	30008	0.0878219	0.322812
UP	DNAH8|1769	1769	-0.0994127	1.5082
UP	PHB|5245	5245	0.148484	0.148191
UP	FAM83D|81610	81610	0.214361	0.178051
UP	SNRPD1|6632	6632	0.258359	0.299641
UP	ZCCHC3|85364	85364	0.11605	0.197167
UP	PRDM13|59336	59336	0.183465	0.721245
UP	B4GALT4|8702	8702	0.053822	0.199759
UP	UPK1B|7348	7348	-0.0155015	0.879477
UP	EFS|10278	10278	0.130113	0.151141
UP	C6orf203|51250	51250	0.0701634	0.532337
UP	NDUFB10|4716	4716	0.0206821	0.148513
UP	ZNF737|100129842	100129842	-0.0178197	0.394078
UP	KRBA1|84626	84626	0.116433	0.238053
UP	ALPP|250	250	-0.124617	0.509502
UP	HIST1H3H|8357	8357	0.0328778	0.204408
UP	GCM1|8521	8521	0.0690077	0.626318
UP	CXorf49B|100132994	100132994	0.0572152	0.21823
UP	DTYMK|1841	1841	0.174824	0.31165
UP	DCAF4L1|285429	285429	0.0701231	0.344778
UP	EEF1E1|9521	9521	0.117548	0.144553
UP	PSMB1|5689	5689	0.108779	0.196461
UP	C17orf104|284071	284071	0.188155	0.398609
UP	C19orf52|90580	90580	0.202924	0.205452
UP	B4GALT5|9334	9334	0.0999234	0.18642
UP	FLVCR1|28982	28982	0.0745982	0.150981
UP	TRPV1|7442	7442	0.0291687	0.138723
UP	BMP7|655	655	0.0674219	0.255301
UP	FLYWCH2|114984	114984	0.00487824	0.146066
UP	BMPER|168667	168667	0.0754717	0.248728
UP	THOC6|79228	79228	0.0145272	0.159675
UP	C17orf67|339210	339210	0.0145003	0.268233
UP	TNFRSF25|8718	8718	0.0253051	0.177
UP	PLA2G16|11145	11145	0.0244248	0.36699
UP	ACTN3|89	89	0.0399935	2.41121
UP	IDI2|91734	91734	0.0760496	0.173395
UP	POPDC3|64208	64208	0.107664	0.211483
UP	ARFGAP1|55738	55738	0.184036	0.2801
UP	GPR137C|283554	283554	-0.00632962	0.150622
UP	ZMYND8|23613	23613	0.0366809	0.154067
UP	RAD9A|5883	5883	0.121177	0.221541
UP	C5orf28|64417	64417	0.138822	0.201689
UP	CNIH4|29097	29097	0.180428	0.165189
UP	RARRES1|5918	5918	0.0604069	0.41026
UP	FAM64A|54478	54478	0.331492	0.692724
UP	NHSL1|57224	57224	0.108034	0.171076
UP	PITX2|5308	5308	0.119618	0.170949
UP	TFDP1|7027	7027	0.0362643	0.157356
UP	FAM196A|642938	642938	0.030741	0.590579
UP	B3GALNT1|8706	8706	0.143566	0.358163
UP	ZNF566|84924	84924	0.0634978	0.178155
UP	EIF4EBP1|1978	1978	0.110681	0.393597
UP	SUV420H1|51111	51111	0.0845025	0.164631
UP	ECE2|9718	9718	0.0819559	0.165356
UP	ZNF436|80818	80818	0.161184	0.213671
UP	HSD17B1|3292	3292	0.0881847	0.988663
UP	HIST1H2BJ|8970	8970	0.10456	0.18549
UP	SNAI1|6615	6615	0.081976	0.184364
UP	ARRDC4|91947	91947	0.00138419	0.188844
UP	C13orf37|440145	440145	0.145313	0.210044
UP	E2F5|1875	1875	-0.00381659	0.147864
UP	PKMYT1|9088	9088	0.191374	0.339246
UP	TIMM8A|1678	1678	0.170954	0.199921
UP	NRTN|4902	4902	-0.123065	0.162216
UP	SUN1|23353	23353	0.186805	0.189243
UP	MRPS14|63931	63931	0.168777	0.1458
UP	SPHK1|8877	8877	0.106878	0.234452
UP	ZNF793|390927	390927	0.0192039	0.220996
UP	PEX3|8504	8504	0.157555	0.167731
UP	TRMT12|55039	55039	0.172808	0.278132
UP	ADRM1|11047	11047	0.104486	0.210026
UP	ZNF77|58492	58492	0.125746	0.237102
UP	EIF4A3|9775	9775	0.205787	0.126023
UP	GLI2|2736	2736	0.0906171	0.478011
UP	DDC|1644	1644	-0.0814788	0.138503
UP	ZNHIT1|10467	10467	0.0160458	0.189245
UP	MTA1|9112	9112	0.046471	0.194514
UP	BUD31|8896	8896	0.14663	0.222656
UP	IGHMBP2|3508	3508	0.0584852	0.252162
UP	CHRNA5|1138	1138	0.163079	0.152644
UP	MYNN|55892	55892	0.0922432	0.162824
UP	NDUFB11|54539	54539	0.0266422	0.158083
UP	TSFM|10102	10102	0.204954	0.910751
UP	SNRPD2|6633	6633	0.161063	0.281713
UP	GPR64|10149	10149	-0.0503481	0.260831
UP	RAD51|5888	5888	0.254717	0.335235
UP	CPT1A|1374	1374	0.105857	0.212687
UP	HOXC9|3225	3225	0.297882	0.712256
UP	SLC25A35|399512	399512	0.0117454	0.208245
UP	ABCG5|64240	64240	0.107872	0.660994
UP	APOL4|80832	80832	0.0594125	0.544682
UP	IZUMO1|284359	284359	0.108195	0.491198
UP	CCDC150|284992	284992	0.246748	0.537543
UP	NLRP11|204801	204801	0.0449659	0.891234
UP	CPSF6|11052	11052	0.184977	0.342011
UP	HAVCR1|26762	26762	-0.0335228	0.989303
UP	MX1|4599	4599	0.0461485	0.227701
UP	MAP3K10|4294	4294	0.0985728	0.170912
UP	RBL1|5933	5933	0.20664	0.164793
UP	ZNF146|7705	7705	0.196635	0.175488
UP	SPP1|6696	6696	0.0179138	0.15404
UP	C6orf130|221443	221443	-0.0409275	0.148631
UP	E2F3|1871	1871	0.103747	0.41649
UP	CCT6A|908	908	0.193007	0.578013
UP	KISS1|3814	3814	-0.0935199	0.195139
UP	TBCE|6905	6905	0.181436	0.177879
UP	C11orf45|219833	219833	0.0976052	0.214787
UP	UTP18|51096	51096	0.212735	0.216049
UP	ALDH1A3|220	220	-0.02126	0.210479
UP	C21orf7|56911	56911	0.12752	0.176383
UP	PPP1R3D|5509	5509	0.0750685	0.146506
UP	FANCE|2178	2178	0.128084	0.151377
UP	ENPEP|2028	2028	0.185588	0.50544
UP	SMO|6608	6608	0.183532	0.64882
UP	POLQ|10721	10721	0.197697	0.230079
UP	ZNF273|10793	10793	0.198154	0.353492
UP	UQCC|55245	55245	0.18321	0.144116
UP	PUS1|80324	80324	0.109794	0.210615
UP	RRP1B|23076	23076	0.135368	0.144465
UP	CDR2|1039	1039	0.131121	0.145243
UP	POLR2H|5437	5437	0.0606623	0.206747
UP	PLAC2|257000	257000	0.0757136	0.215873
UP	FKBP14|55033	55033	0.0585389	0.149455
UP	FATE1|89885	89885	-0.0356529	0.140449
UP	RAB32|10981	10981	0.128111	0.239222
UP	KCNK2|3776	3776	0.130234	0.570017
UP	GSG2|83903	83903	0.21221	0.233175
UP	B4GALNT4|338707	338707	0.0222545	0.148157
UP	ZNF93|81931	81931	0.0720448	0.310084
UP	TRPA1|8989	8989	0.101261	1.16014
UP	C1QTNF6|114904	114904	0.0258695	0.186032
UP	DBI|1622	1622	0.128205	0.248612
UP	C2orf61|285051	285051	0.131901	0.205033
UP	ACN9|57001	57001	0.0779444	0.29545
UP	HTRA3|94031	94031	0.0145003	0.375969
UP	HIST1H2AD|3013	3013	0.0402018	0.309068
UP	C8orf85|441376	441376	-0.0178667	1.02643
UP	EIF2AK2|5610	5610	0.0991372	0.169717
UP	C1orf86|199990	199990	0.0178063	0.221414
UP	ZNF217|7764	7764	0.144338	0.388426
UP	ZNF320|162967	162967	0.0461485	0.195148
UP	PRAP1|118471	118471	0.00995807	1.23727
UP	NUP37|79023	79023	0.146784	0.19917
UP	HSD17B3|3293	3293	0.136241	0.401695
UP	EMID2|136227	136227	-0.0537951	0.413908
UP	MEX3D|399664	399664	0.09821	0.200003
UP	MAGEA6|4105	4105	0.172801	0.258364
UP	FANCD2|2177	2177	0.245579	0.371536
UP	GPC3|2719	2719	0.0651239	1.58044
UP	OLFML2B|25903	25903	-0.00662527	0.14028
UP	UBA2|10054	10054	0.206862	0.158922
UP	NR6A1|2649	2649	0.145864	0.153518
UP	LSM3|27258	27258	0.183687	0.242335
UP	GOLGA7|51125	51125	0.0278718	0.141505
UP	EPS15L1|58513	58513	0.155728	0.183306
UP	LOC550643|550643	550643	0.137034	0.258759
UP	B3GALT6|126792	126792	0.0835484	0.205051
UP	RHEBL1|121268	121268	0.118476	0.169156
UP	LSM14B|149986	149986	0.143928	0.178186
UP	USP35|57558	57558	-0.0273813	0.401887
UP	TIMM13|26517	26517	0.0752298	0.180233
UP	RPF2|84154	84154	0.140448	0.264899
UP	EFCAB3|146779	146779	0.0547291	1.18666
UP	C7orf47|221908	221908	0.0609982	0.140499
UP	CPXM1|56265	56265	-0.00205612	0.888897
UP	TMEM201|199953	199953	0.125034	0.206458
UP	ROMO1|140823	140823	0.151252	0.482878
UP	ETNK2|55224	55224	0.0649895	0.54021
UP	CYP27B1|1594	1594	0.259152	0.83651
UP	HIC1|3090	3090	-0.0346987	0.510309
UP	TMEM176A|55365	55365	0.0167581	0.199565
UP	NDUFA11|126328	126328	-0.0227248	0.200609
UP	GPATCH1|55094	55094	0.162998	0.226769
UP	UQCR11|10975	10975	-0.0313928	0.168196
UP	DNAJC2|27000	27000	0.193127	0.254257
UP	HIST1H4B|8366	8366	0.0530694	0.511282
UP	POGK|57645	57645	0.117011	0.169372
UP	C19orf45|374877	374877	0.000174703	0.18437
UP	ATOH7|220202	220202	0.0907784	0.224011
UP	ZNF610|162963	162963	-0.0104419	0.157708
UP	PLAG1|5324	5324	0.125235	0.443894
UP	B3GALTL|145173	145173	0.0757942	0.201534
UP	GSTM3|2947	2947	0.0406789	0.165339
UP	TPSB2|64499	64499	-0.146623	1.04205
UP	ANKRD33|341405	341405	0.179548	2.07928
UP	MST4|51765	51765	0.102067	0.155431
UP	COL4A1|1282	1282	0.126539	0.300904
UP	NKX2-2|4821	4821	0.0290343	0.165766
UP	PAQR7|164091	164091	0.052384	0.170208
UP	FBP2|8789	8789	0.0151521	0.847339
UP	MTCP1NB|100272147	100272147	0.0160996	0.216666
UP	SLC18A3|6572	6572	0.0140838	1.94755
UP	PABPC1L|80336	80336	0.154431	0.436872
UP	CPNE4|131034	131034	0.012545	0.291965
UP	CBWD6|644019	644019	0.0839582	0.154673
UP	SGK2|10110	10110	-0.00370908	0.518316
UP	C20orf108|116151	116151	0.0198624	0.187552
UP	SIX3|6496	6496	0.135979	0.509602
UP	ATG5|9474	9474	0.129401	0.23859
UP	STIL|6491	6491	0.150527	0.12125
UP	NR1I3|9970	9970	0.114498	0.423778
UP	METTL8|79828	79828	0.132579	0.150893
UP	SSBP4|170463	170463	0.0247944	0.219831
UP	CCNF|899	899	0.207319	0.241849
UP	C7orf27|221927	221927	0.0984922	0.194314
UP	AOX1|316	316	0.0144197	0.177101
UP	CBS|875	875	0.134763	0.157338
UP	GAMT|2593	2593	0.024324	0.184759
UP	GDPD5|81544	81544	0.0515105	0.267021
UP	SNX3|8724	8724	0.106166	0.143422
UP	ADH6|130	130	-0.131538	0.962241
UP	KL|9365	9365	-0.0904021	0.168825
UP	CDC20|991	991	0.199269	0.337879
UP	RASL11B|65997	65997	0.0397651	0.187251
UP	CKAP2|26586	26586	0.270319	0.319491
UP	NPFF|8620	8620	0.0549374	0.35083
UP	HIST1H2AL|8332	8332	0.100535	0.406939
UP	HIST1H3J|8356	8356	0.0481912	0.312303
UP	TMEM161A|54929	54929	0.0778638	0.224794
UP	KIF20B|9585	9585	0.143001	0.226611
UP	DNLZ|728489	728489	0.110399	0.273908
UP	SLC39A5|283375	283375	-0.0255604	1.69974
UP	C17orf42|79736	79736	0.198503	0.214463
UP	DTX3|196403	196403	0.035411	0.774742
UP	MMP14|4323	4323	0.0903147	0.17302
UP	ALS2CR4|65062	65062	0.201634	0.275869
UP	PIGZ|80235	80235	0.0766946	0.255509
UP	KLK4|9622	9622	-0.0722934	1.47771
UP	PEG10|23089	23089	0.066535	0.16469
UP	ADAMTS2|9509	9509	0.00907112	0.261013
UP	PPARG|5468	5468	0.0393082	1.04555
UP	DEGS1|8560	8560	0.121412	0.148963
UP	TFAP4|7023	7023	0.0967989	0.168309
UP	TTYH3|80727	80727	0.156265	0.340265
UP	ZNF486|90649	90649	0.0877345	0.544074
UP	CHI3L1|1116	1116	0.0119739	0.580821
UP	PRMT1|3276	3276	0.100831	0.149077
UP	EMILIN3|90187	90187	0.0847511	1.62444
UP	MMP23B|8510	8510	-0.00162608	0.480432
UP	EXT2|2132	2132	0.116742	0.14329
UP	S1PR5|53637	53637	0.10124	0.391489
UP	GPX8|493869	493869	0.0280062	0.205607
UP	RNASEH2A|10535	10535	0.233484	0.322768
UP	TGFB2|7042	7042	0.00110197	0.219273
UP	DTNB|1838	1838	-0.000685373	0.191578
UP	C20orf7|79133	79133	0.144291	0.161007
UP	ZNF606|80095	80095	0.0560192	0.200846
UP	PNO1|56902	56902	0.226576	0.190583
UP	TPRKB|51002	51002	0.165894	0.202731
UP	ZNF138|7697	7697	0.115949	0.182106
UP	SPC24|147841	147841	0.265065	0.498742
UP	KIF18B|146909	146909	0.270319	0.411478
UP	PHF5A|84844	84844	0.147691	0.129478
UP	COL6A1|1291	1291	0.0792077	0.297478
UP	GAS2|2620	2620	-0.0785357	0.697289
UP	SLC2A8|29988	29988	0.0235983	0.138262
UP	C1orf96|126731	126731	0.152986	0.122571
UP	FNDC8|54752	54752	0.0761033	0.200339
UP	NIF3L1|60491	60491	0.167097	0.121909
UP	NDUFB9|4715	4715	0.130207	0.254599
UP	RADIL|55698	55698	0.043071	0.478129
UP	ZNF107|51427	51427	0.134253	0.234324
UP	CDKAL1|54901	54901	0.167352	0.343102
UP	GPR133|283383	283383	-0.0827622	0.251856
UP	BRMS1|25855	25855	0.0890851	0.206588
UP	TCTE3|6991	6991	0.127049	0.51331
UP	RECK|8434	8434	0.0276165	0.188425
UP	ZNF558|148156	148156	0.0545745	0.164076
UP	ZNF681|148213	148213	-0.0108853	0.139519
UP	TOMM34|10953	10953	0.0920013	0.289755
UP	FSCN3|29999	29999	-0.00495216	0.210603
UP	TGFBR1|7046	7046	0.127385	0.180604
UP	EMP3|2014	2014	0.101691	0.286079
UP	PPIL5|122769	122769	0.187322	0.184804
UP	LLPH|84298	84298	0.182497	0.289884
UP	SOCS2|8835	8835	0.0770575	0.280841
UP	CNIH3|149111	149111	0.0243509	0.279793
UP	ACLY|47	47	0.171941	0.13444
UP	SDK1|221935	221935	-0.0327098	0.188056
UP	RAB3IL1|5866	5866	-0.0273477	0.331385
UP	RBP4|5950	5950	0.0279189	0.865917
UP	ENTPD2|954	954	-0.00809009	0.553271
UP	MYLK2|85366	85366	0.0539765	0.1966
UP	STARD3|10948	10948	0.166593	0.991869
UP	TMEM147|10430	10430	0.146146	0.273465
UP	TRIM33|51592	51592	0.0169462	0.174509
UP	LMO2|4005	4005	-0.0891523	0.283501
UP	CYTL1|54360	54360	-0.00380315	0.849695
UP	SDCCAG3|10807	10807	0.168716	0.169966
UP	C12orf48|55010	55010	0.185051	0.341136
UP	C16orf79|283870	283870	0.0990969	0.348641
UP	OAF|220323	220323	0.034094	0.210354
UP	ZNF343|79175	79175	0.209939	0.170709
UP	PXN|5829	5829	0.10032	0.158949
UP	PARP2|10038	10038	0.141126	0.149758
UP	MMP3|4314	4314	0.087197	0.164855
UP	HDAC2|3066	3066	0.219037	0.244698
UP	MPPED2|744	744	-0.0372722	0.271264
UP	AS3MT|57412	57412	-0.0465113	0.156354
UP	ITPRIPL1|150771	150771	0.0487153	0.332106
UP	B4GALT6|9331	9331	0.0500188	0.232586
UP	ZNF492|57615	57615	0.00542923	0.885092
UP	BRP44|25874	25874	0.0547895	0.157061
UP	MED26|9441	9441	0.0970072	0.183187
UP	PCMT1|5110	5110	0.230668	0.15285
UP	RBM45|129831	129831	0.154847	0.0575462
UP	DCHS1|8642	8642	-0.000215019	0.277643
UP	CHST13|166012	166012	0.0176316	0.832647
UP	SHC4|399694	399694	0.050973	0.276151
UP	CPSF4|10898	10898	0.182592	0.216615
UP	CCDC23|374969	374969	0.159423	0.17605
UP	ADNP|23394	23394	0.197643	0.149696
UP	FADD|8772	8772	0.157112	0.573606
UP	ACOXL|55289	55289	-0.0269513	0.345819
UP	FAM127A|8933	8933	0.0957104	0.151622
UP	TRMU|55687	55687	0.106488	0.17478
UP	SUMF2|25870	25870	-0.00206956	0.30932
UP	ROBO3|64221	64221	0.0759555	0.504626
UP	POMZP3|22932	22932	0.0382196	0.280095
UP	TUBA8|51807	51807	0.0697267	0.1606
UP	ZNF684|127396	127396	0.112213	0.141802
UP	FKBP7|51661	51661	0.0546283	0.219619
UP	TUBA1A|7846	7846	0.0142988	0.333373
UP	IL13RA2|3598	3598	0.0638271	0.290441
UP	NUDCD1|84955	84955	0.126673	0.159698
UP	ATXN7L2|127002	127002	0.114726	0.232995
UP	RAD54L|8438	8438	0.224057	0.315916
UP	GNL1|2794	2794	0.0711176	0.145901
UP	LAPTM4B|55353	55353	0.0622749	0.206408
UP	CYP4A11|1579	1579	-0.0902341	0.351046
UP	ISOC2|79763	79763	0.0231683	0.17146
UP	PDCD2L|84306	84306	0.101865	0.164182
UP	NSFL1C|55968	55968	0.161835	0.146966
UP	NES|10763	10763	0.0862697	0.265274
UP	C1orf52|148423	148423	0.227342	0.191097
UP	C6orf167|253714	253714	0.167399	0.139665
UP	GNAI3|2773	2773	0.175711	0.0876729
UP	ZNF626|199777	199777	0.0114901	0.36706
UP	CLNS1A|1207	1207	0.0162608	0.155955
UP	DSEL|92126	92126	-0.0230205	0.166933
UP	CXorf36|79742	79742	-0.056765	0.145736
UP	ZBTB8B|728116	728116	0.0954954	0.334735
UP	PTGS2|5743	5743	-0.0157569	0.339023
UP	TSN|7247	7247	0.177471	0.0959288
UP	AKT2|208	208	0.0510133	0.204485
UP	BZW2|28969	28969	0.138902	0.206888
UP	METT11D1|64745	64745	0.0899385	0.155919
UP	PLOD1|5351	5351	0.0676773	0.251309
UP	VAX2|25806	25806	0.0450062	0.174171
UP	TMEM90A|646658	646658	-0.0609109	0.836786
UP	PHEX|5251	5251	-0.00569129	0.687324
UP	STK35|140901	140901	0.166438	0.174157
UP	C1orf109|54955	54955	0.193262	0.129296
UP	HOXC11|3227	3227	0.236239	0.747768
UP	H1FX|8971	8971	0.0917056	0.216841
UP	EIF2B3|8891	8891	0.21088	0.127968
UP	MCM2|4171	4171	0.192724	0.137321
UP	SLC19A1|6573	6573	0.0382465	0.174849
UP	RGS16|6004	6004	0.125491	0.246611
UP	CCDC152|100129792	100129792	0.0382667	0.598116
UP	ERP27|121506	121506	-0.0268908	0.42767
UP	SNRPA1|6627	6627	0.107321	0.153813
UP	NDUFA13|51079	51079	0.0286916	0.275626
UP	SKA3|221150	221150	0.244638	0.389406
UP	SERPINA10|51156	51156	0.114202	0.269087
UP	ELF4|2000	2000	0.08504	0.150754
UP	PDCL3|79031	79031	0.172445	0.220269
UP	C19orf46|163183	163183	-0.024445	0.348545
UP	FXYD3|5349	5349	0.0487153	0.193672
UP	SUV39H2|79723	79723	0.212331	0.22592
UP	SLC29A1|2030	2030	0.085591	0.845787
UP	ENTHD1|150350	150350	0.0448718	0.659704
UP	ZNF211|10520	10520	0.0735634	0.219342
UP	ONECUT2|9480	9480	0.106031	0.371173
UP	SNRPD3|6634	6634	0.0973633	0.172743
UP	MND1|84057	84057	0.172801	0.25477
UP	KLC4|89953	89953	-0.0190964	0.221212
UP	POFUT1|23509	23509	0.183331	0.141513
UP	DLX6|1750	1750	0.0210114	0.263338
UP	ANKRD20A3|441425	441425	-0.00939365	0.490307
UP	FAM72D|728833	728833	0.301873	0.593982
UP	C1orf9|51430	51430	0.112536	0.299297
UP	ZFAT|57623	57623	-0.0585524	0.218061
UP	PRRX2|51450	51450	0.106233	0.490401
UP	ARL9|132946	132946	0.0927068	0.221398
UP	KIAA0101|9768	9768	0.136201	0.180345
UP	C19orf53|28974	28974	0.0478216	0.217474
UP	FGFR1|2260	2260	-0.0605682	0.671612
UP	PIM1|5292	5292	0.131094	0.42611
UP	HMMR|3161	3161	0.175845	0.268604
UP	USP6|9098	9098	0.0888029	0.166551
UP	GRID2IP|392862	392862	0.0504757	0.146971
UP	MAT1A|4143	4143	-0.0893203	0.209485
UP	NPEPL1|79716	79716	0.13987	0.29319
UP	ZNF418|147686	147686	0.0608706	0.323309
UP	NOTCH4|4855	4855	0.000403161	0.294687
UP	GPC6|10082	10082	-0.0223485	0.282148
UP	LRP5L|91355	91355	0.0269379	0.175264
UP	DUSP23|54935	54935	-0.0172418	0.182436
UP	DEDD|9191	9191	0.0711982	0.162383
UP	ARHGAP33|115703	115703	0.0717223	0.201347
UP	JAGN1|84522	84522	0.0838574	0.151371
UP	ORC1L|4998	4998	0.177418	0.126613
UP	TTC7B|145567	145567	0.220851	0.274866
UP	GATA5|140628	140628	-0.0771583	0.312863
UP	EBNA1BP2|10969	10969	0.163737	0.126812
UP	PPP1R3G|648791	648791	0.0932645	0.298669
UP	ASCL1|429	429	0.00280197	0.196709
UP	SLC18A1|6570	6570	-0.0194592	0.764592
UP	FLRT2|23768	23768	-0.0413643	0.379379
UP	TCEB2|6923	6923	0.0356058	0.278718
UP	HIST1H3E|8353	8353	0.0691757	0.226383
UP	RNF175|285533	285533	-0.0339999	0.141588
UP	LMX1A|4009	4009	-0.0750685	1.67301
UP	ISPD|729920	729920	0.14796	0.203824
UP	FOSL1|8061	8061	0.0947159	0.175217
UP	SLC9A3|6550	6550	0.0397987	0.765159
UP	SHISA5|51246	51246	0.0933586	0.196532
UP	TFDP2|7029	7029	0.0711041	0.224254
UP	CAND1|55832	55832	0.0826883	0.245297
UP	AFAP1L1|134265	134265	0.129186	0.180496
UP	COL5A2|1290	1290	0.115425	0.199316
UP	MEX3A|92312	92312	0.073429	0.625536
UP	CD14|929	929	-0.0870155	0.225903
UP	TAF11|6882	6882	0.171021	0.186998
UP	PGF|5228	5228	0.142497	0.642484
UP	C17orf76|388341	388341	0.0562275	0.267439
UP	PXDNL|137902	137902	0.118012	0.538643
UP	RGS6|9628	9628	0.0205142	0.827426
UP	C6orf62|81688	81688	0.101865	0.139691
UP	ASAP3|55616	55616	0.123206	0.237954
UP	CBX1|10951	10951	0.181073	0.193107
UP	TOR2A|27433	27433	0.0539967	0.172717
UP	RFWD2|64326	64326	0.148914	0.120059
UP	CCDC116|164592	164592	0.0404841	0.293814
UP	PAFAH1B3|5050	5050	0.0351959	0.174451
UP	ARHGAP29|9411	9411	0.0920954	0.162645
UP	WHSC2|7469	7469	0.0168924	0.144928
UP	SIRT5|23408	23408	0.0893539	0.162211
UP	WDR43|23160	23160	0.180361	0.182815
UP	KDM5B|10765	10765	0.0665484	0.153962
UP	PVALB|5816	5816	0.0245055	0.335168
UP	HAUS5|23354	23354	0.157636	0.221414
UP	PREP|5550	5550	0.102752	0.200167
UP	CHERP|10523	10523	0.112307	0.199918
UP	PLK4|10733	10733	0.220166	0.307749
UP	TMEM106C|79022	79022	0.0788448	0.17962
UP	GALR2|8811	8811	0.0111944	0.833433
UP	ZNF572|137209	137209	0.152731	0.328301
UP	C16orf74|404550	404550	0.180186	0.297433
UP	KIF11|3832	3832	0.189311	0.26406
UP	FAM119B|25895	25895	0.176101	1.56212
UP	SLC10A3|8273	8273	0.0441999	0.176718
UP	ENPP6|133121	133121	0.0619994	0.425628
UP	BCORL1|63035	63035	0.10843	0.18705
UP	MSL1|339287	339287	0.185199	0.23231
UP	C1orf135|79000	79000	0.232772	0.470523
UP	LXN|56925	56925	-0.00744504	0.269369
UP	C8G|733	733	0.0169664	0.261085
UP	RASGEF1A|221002	221002	0.0926329	0.145305
UP	WBP5|51186	51186	0.1845	0.247626
UP	PRSS45|377047	377047	0.0140434	0.453312
UP	DCAF4|26094	26094	0.132526	0.204365
UP	ZBTB10|65986	65986	0.0485137	0.156426
UP	ALG8|79053	79053	0.0867199	0.263739
UP	HIST1H3C|8352	8352	0.124247	0.377414
UP	VPS16|64601	64601	0.160391	0.148568
UP	CAPN11|11131	11131	0.0520749	0.630913
UP	GSDMB|55876	55876	0.0787911	0.155847
UP	MAGED2|10916	10916	0.01063	0.161983
UP	CAPRIN2|65981	65981	0.114189	0.168513
UP	GYG2|8908	8908	0.00092727	0.139205
UP	NPIPL3|23117	23117	0.0368355	0.234976
UP	MCM10|55388	55388	0.253373	0.372789
UP	CPA2|1358	1358	0.136208	0.227846
UP	STRN4|29888	29888	0.099836	0.147834
UP	NRAS|4893	4893	0.120041	0.341528
UP	ZNF653|115950	115950	0.034309	0.164977
UP	OCM|654231	654231	0.0251438	0.303143
UP	DPF1|8193	8193	0.124805	0.489844
UP	CPSF4L|642843	642843	0.014198	0.234767
UP	NOTCH3|4854	4854	0.0422378	0.165637
UP	CHST14|113189	113189	0.0745041	0.245544
UP	RRM2|6241	6241	0.14835	0.126272
UP	ATP5E|514	514	0.122937	0.223953
UP	ADAD2|161931	161931	0.0768021	0.716302
UP	RAB3IP|117177	117177	0.0609982	0.399917
UP	IL24|11009	11009	0.0896025	0.299217
UP	POU6F2|11281	11281	0.0831586	0.521416
UP	LAMA4|3910	3910	0.0749342	0.23907
UP	NRM|11270	11270	0.19556	0.33838
UP	ZNF593|51042	51042	0.015992	0.265084
UP	SLC20A1|6574	6574	0.150997	0.166471
UP	FAM96B|51647	51647	0.027892	0.164889
UP	CCDC130|81576	81576	0.0902811	0.213413
UP	FOXRED1|55572	55572	-0.0244315	0.140449
UP	C17orf58|284018	284018	0.133043	0.356423
UP	VAMP4|8674	8674	0.0687927	0.17789
UP	TMEM139|135932	135932	-0.10415	0.221778
UP	ACCN3|9311	9311	0.06378	0.340213
UP	APOA1|335	335	0.0494409	1.58132
UP	PSMD14|10213	10213	0.208253	0.150603
UP	CLSPN|63967	63967	0.173567	0.128696
UP	SLC2A1|6513	6513	0.0739262	0.338799
UP	IFT20|90410	90410	0.150796	0.269754
UP	CAD|790	790	0.10544	0.142698
UP	ZNF69|7620	7620	0.00171343	0.25035
UP	C4orf48|401115	401115	0.0245794	0.640556
UP	ACTL6A|86	86	0.186502	0.212312
UP	DAB2|1601	1601	-0.0329114	0.357296
UP	PDPN|10630	10630	0.198382	0.563774
UP	C19orf44|84167	84167	0.0519809	0.222413
UP	UFSP1|402682	402682	0.0886551	0.14512
UP	C4orf46|201725	201725	0.154054	0.180846
UP	TROAP|10024	10024	0.241238	0.494781
UP	KIF4B|285643	285643	0.202568	0.189076
UP	C11orf24|53838	53838	0.0915578	0.234985
UP	C9orf119|375757	375757	0.158751	0.288415
UP	LOC389493|389493	389493	0.0593789	0.670918
UP	C7orf28B|221960	221960	0.124913	0.183279
UP	ZNF286B|729288	729288	0.0832057	0.259732
UP	METTL11A|28989	28989	0.142403	0.144143
UP	ST3GAL4|6484	6484	0.116849	0.183286
UP	CNOT2|4848	4848	0.153631	0.535327
UP	CNGB1|1258	1258	0.0361165	0.387266
UP	NTHL1|4913	4913	0.0169193	0.225552
UP	RALBP1|10928	10928	0.0581358	0.313893
UP	RAD21|5885	5885	0.168145	0.151302
UP	CREB5|9586	9586	0.0168252	0.59663
UP	ZNF100|163227	163227	0.0711108	0.183227
UP	SPRY1|10252	10252	-0.0163616	0.29922
UP	PTRH2|51651	51651	0.0812772	0.158965
UP	TMPRSS9|360200	360200	0.114632	0.414817
UP	TIAM2|26230	26230	0.0706069	0.360177
UP	HIST1H2BG|8339	8339	0.0576318	0.455656
UP	LEPREL2|10536	10536	0.152462	0.52624
UP	C9orf43|257169	257169	-0.00970946	0.237118
UP	LIG3|3980	3980	0.153779	0.247238
UP	CDX1|1044	1044	-0.0172015	0.632416
UP	EGFR|1956	1956	0.125934	1.34387
UP	C9orf66|157983	157983	0.0538085	0.166652
UP	AVPR2|554	554	-0.0952266	0.739595
UP	ZNF311|282890	282890	0.124879	0.298533
UP	BIRC2|329	329	0.0450734	0.380061
UP	PHF14|9678	9678	0.158147	0.0809226
UP	CDK12|51755	51755	0.0805784	0.258275
UP	LEPREL1|55214	55214	0.0471833	0.227023
UP	PFDN4|5203	5203	0.266745	0.39819
UP	BCAM|4059	4059	-0.0239746	0.17758
UP	TEKT3|64518	64518	0.00702172	0.323011
UP	MT1H|4496	4496	0.0224628	0.883701
UP	TGIF1|7050	7050	0.0652045	0.200355
UP	FKBP6|8468	8468	-0.0363987	0.2736
UP	TCTEX1D2|255758	255758	0.0234169	0.137809
UP	PRKCSH|5589	5589	0.0379643	0.160962
UP	ZNF677|342926	342926	-0.0121755	0.169401
UP	TMEM120B|144404	144404	0.0676101	0.171543
UP	SUB1|10923	10923	0.147476	0.175858
UP	PLA2G2A|5320	5320	0.117555	1.26088
UP	CATSPERG|57828	57828	0.00688733	0.22003
UP	CLCA1|1179	1179	0.112361	2.27858
UP	ASPM|259266	259266	0.233269	0.315498
UP	EIF2S2|8894	8894	0.201742	0.157674
UP	HSPH1|10808	10808	0.160781	0.277927
UP	LYRM5|144363	144363	-0.0214616	0.184596
UP	TMEM31|203562	203562	0.0828563	0.459948
UP	CCDC103|388389	388389	-0.113772	0.152741
UP	PRSS21|10942	10942	0.0336639	0.847735
UP	TTC27|55622	55622	0.140609	0.143517
UP	ANO1|55107	55107	0.0166237	0.431168
UP	PAPD7|11044	11044	0.214925	0.191099
UP	MAF|4094	4094	0.0256948	0.236418
UP	C6orf125|84300	84300	0.0461283	0.189747
UP	C19orf62|29086	29086	0.0876472	0.242421
UP	MBD3|53615	53615	0.0168118	0.156551
UP	TEX11|56159	56159	0.0129415	0.411141
UP	KAZALD1|81621	81621	-0.0963957	0.294408
UP	SKAP2|8935	8935	0.155969	0.176372
UP	ZNF623|9831	9831	0.114404	0.149907
UP	ART5|116969	116969	0.060884	0.659606
UP	LPCAT1|79888	79888	0.117494	0.210501
UP	RIPPLY1|92129	92129	0.128971	0.753485
UP	LAMB4|22798	22798	-0.0146146	0.385153
UP	H2AFX|3014	3014	0.100038	0.247685
UP	TULP1|7287	7287	0.221342	0.637387
UP	STK3|6788	6788	0.137908	0.15983
UP	CCDC80|151887	151887	-0.0395232	0.356289
UP	DTL|51514	51514	0.189741	0.210459
UP	BEND5|79656	79656	0.00449524	0.153466
UP	FAM162A|26355	26355	0.0306469	0.155127
UP	C1QTNF9|338872	338872	-0.0775883	0.892769
UP	WDR88|126248	126248	0.0819559	0.43985
UP	IGF2BP3|10643	10643	0.211149	0.459175
UP	XPO1|7514	7514	0.179595	0.166686
UP	HSP90AB1|3326	3326	0.0933183	0.178161
UP	DPT|1805	1805	-0.0531567	1.30852
UP	SLC16A11|162515	162515	0.0249086	0.164557
UP	KRT7|3855	3855	0.0130355	0.242767
UP	MATN2|4147	4147	0.0372117	0.179616
UP	LEAP2|116842	116842	0.0499315	0.458775
UP	HOXA7|3204	3204	0.219776	0.819709
UP	OSR2|116039	116039	0.0524243	0.303606
UP	GRIN2D|2906	2906	0.0824867	0.333141
UP	LRRN2|10446	10446	-0.0223351	1.31681
UP	ZNF765|91661	91661	0.158241	0.213469
UP	EPN3|55040	55040	0.00431382	0.201624
UP	NDC80|10403	10403	0.270252	0.471116
UP	EIF2B1|1967	1967	0.186717	0.136994
UP	HIST1H1B|3009	3009	0.134918	0.550929
UP	ZNF44|51710	51710	0.0271327	0.158246
UP	SAMD13|148418	148418	0.0250363	0.141743
UP	HSPBAP1|79663	79663	0.163273	0.186804
UP	PLA2G5|5322	5322	0.00756598	0.367023
UP	MAGED4|728239	728239	0.110264	0.448692
UP	SMC4|10051	10051	0.217828	0.247166
UP	TMEM82|388595	388595	0.0195063	0.400514
UP	PLIN5|440503	440503	0.0166774	0.575314
UP	SLC47A2|146802	146802	0.0278047	0.845561
UP	ZNF114|163071	163071	0.139097	0.415311
UP	C16orf63|123811	123811	0.105789	0.158375
UP	C19orf36|113177	113177	-0.088823	0.140512
UP	COL15A1|1306	1306	-0.0178264	0.285759
UP	IQGAP3|128239	128239	0.196917	0.314208
UP	PROCR|10544	10544	0.173252	0.565119
UP	GPIHBP1|338328	338328	-0.0812974	0.218309
UP	CCDC123|84902	84902	0.235271	0.392827
UP	RPIA|22934	22934	0.0586532	0.206102
UP	TUFT1|7286	7286	0.164261	0.269808
UP	MICA|4276	4276	0.0876337	0.195837
UP	SHROOM2|357	357	0.0274956	0.155271
UP	ABCG8|64241	64241	0.0254932	0.858378
UP	DUSP10|11221	11221	0.0547895	0.150343
UP	EPOR|2057	2057	0.00647745	0.175943
UP	FFAR2|2867	2867	0.0415457	0.140794
UP	FAM176B|55194	55194	0.0147624	0.173617
UP	NAA25|80018	80018	0.157582	0.142678
UP	DOM3Z|1797	1797	0.0748266	0.203365
UP	NMNAT3|349565	349565	0.0773531	0.162409
UP	C15orf61|145853	145853	0.193067	0.503556
UP	BOC|91653	91653	-0.0351422	0.25755
UP	C2orf76|130355	130355	0.141644	0.215032
UP	SLC38A11|151258	151258	0.0445694	0.611481
UP	CALHM3|119395	119395	0.085329	0.383924
UP	PFDN6|10471	10471	0.0560125	0.151905
UP	MRPL55|128308	128308	0.0566575	0.172188
UP	C13orf34|79866	79866	0.186684	0.262585
UP	ERI3|79033	79033	0.137424	0.161234
UP	TBC1D22B|55633	55633	0.0311912	0.160505
[truncated: 5,881 more rows]

## Sheet: 1H
GO id	GO term	p-value	padj	#genes	#CorEx genes	#Core genes	CorEx genes
[truncated: 187 more rows]

[truncated: 10 more sheets: 1I, 1J, 1K, 1L, 1M, 1N, 1O, 1P, 1Q, 1R]
